# Supplementary material for: Formononetin relieves the facilitating effect of lncRNA AFAP1-AS1-miR-195/miR-545 axis on progression and chemo-resistance of triple-negative breast cancer
Source: Aging (Albany NY). 2021 Jul 21;13(14):18191–222. doi: 10.18632/aging.203156 (PMC8351708; doi:10.18632/aging.203156)
Supplement: Supplementary Table 1 [file aging-13-203156-s002.xlsx]

## Sheet: Differentially-expressed ncRNAs
Supplementary Table 1. Differentially-expressed long non-coding RNAs (lncRNAs) between MDA-MB-231 cell line and cisplatin-resistant MDA-MB-231 (MDA-MB-231/DDP) cell line according to results of microarray analysis.
Probe Set ID	ncRNA	Description	type	P-value	FDR	Geom mean of intensities in MDA-MB-231/DDP	Geom mean of intensities in MDA-MB-231	Fold-change(naiyao/feinaiyao)	style	Cytoband	ncRNA Accession	ncRNA Source	ncRna - Description	Chromosome	Strand	Start	Stop	GO Biological Process ID	GO Biological Process Term	GO Biological Process Evidence	GO Cellular Component ID	GO Cellular Component Term	GO Cellular Component Evidence	GO Molecular Function ID	GO Molecular Function Term	GO Molecular Function Evidence	Pathway Source	Pathway Name	Protein Domains - Source	Protein Domains - Accession or domain name	Protein Domains - Description	category	up stream.10kb	intersense	down stream.10kb	antisense
TC0X001941.hg.1	---	linc-CHM-1 chrX:-:86979060-86983512	noncoding	0.0010975	0.133	56.25	229.59	0.24	down	---	TCONS_00017351-XLOC_008194	Rinn lincRNAs	linc-CHM-1 chrX:-:86979060-86983512	chrX	-	86979061	86983512	---	---	---	---	---	---	---	---	---	---	---	---	---	---	main
TC14000918.hg.1	SNORD9	small nucleolar RNA, C/D box 9	noncoding	0.0012547	0.136	113.03	436.13	0.26	down	14q11.2	NR_003029	RefSeq // ENSEMBL // UCSC Genes	Homo sapiens small nucleolar RNA, C/D box 9 (SNORD9), small nucleolar RNA. // ncrna:snoRNA chromosome:GRCh37:14:21860309:21860412:-1 gene:ENSG00000199436 gene_biotype:snoRNA transcript_biotype:snoRNA // ---	chr14	-	21860309	21860412	---	---	---	---	---	---	---	---	---	---	---	---	---	---	main		CHD8	SUPT16H 7884bp;
TC0X001420.hg.1	SNORD61	small nucleolar RNA, C/D box 61	noncoding	0.0004734	0.107	142.28	510.95	0.28	down	Xq26.3	NR_002735	RefSeq // ENSEMBL // UCSC Genes	Homo sapiens small nucleolar RNA, C/D box 61 (SNORD61), small nuclear RNA. // ncrna:snoRNA chromosome:GRCh37:X:135961358:135961430:-1 gene:ENSG00000206979 gene_biotype:snoRNA transcript_biotype:snoRNA // ---	chrX	-	135961358	135961430	---	---	---	---	---	---	---	---	---	---	---	---	---	---	main		RBMX
TC14001821.hg.1	---	accn=AJ294851 class=mRNAlike lncRNA name=NULL ref=H-invitational v7.5 transcriptId=HIT000246658 cpcScore=-0.8530460 cnci=-0.2424470 | accn=AY126456 class=mRNAlike lncRNA name=NULL ref=H-invitational v7.5 transcriptId=HIT000250729 cpcScore=-0.7976560 cnci=-0.1799725	noncoding	0.0014505	0.139	254.71	870.48	0.29	down	---	n334829	NONCODE // NONCODE	accn=AJ294851 class=mRNAlike lncRNA name=NULL ref=H-invitational v7.5 transcriptId=HIT000246658 cpcScore=-0.8530460 cnci=-0.2424470 // accn=AY126456 class=mRNAlike lncRNA name=NULL ref=H-invitational v7.5 transcriptId=HIT000250729 cpcScore=-0.7976560 cnci=-0.1799725	chr14	+	94577084	94582176	---	---	---	---	---	---	---	---	---	---	---	---	---	---	main	IFI27L1 6892bp;	IFI27
TC01005780.hg.1	SNORA59B	small nucleolar RNA, H/ACA box 59B	noncoding	0.0027513	0.169	76.24	236.51	0.32	down	17p11.2	NR_003022	RefSeq // ENSEMBL // RefSeq	Homo sapiens small nucleolar RNA, H/ACA box 59B (SNORA59B), small nucleolar RNA. // ncrna:snoRNA chromosome:GRCh37:1:12567300:12567451:1 gene:ENSG00000239149 gene_biotype:snoRNA transcript_biotype:snoRNA // Homo sapiens small nucleolar RNA, H/ACA box 59A (SNORA59A), small nucleolar RNA.	chr1	+	12567300	12567451	---	---	---	---	---	---	---	---	---	---	---	---	---	---	main		VPS13D
TC10001589.hg.1	SNORA12	small nucleolar RNA, H/ACA box 12	noncoding	0.0078287	0.231	91.35	286.79	0.32	down	10q24.31	NR_002954	RefSeq // ENSEMBL // UCSC Genes	Homo sapiens small nucleolar RNA, H/ACA box 12 (SNORA12), small nucleolar RNA. // ncrna:snoRNA chromosome:GRCh37:10:101996913:101997059:-1 gene:ENSG00000212464 gene_biotype:snoRNA transcript_biotype:snoRNA // ---	chr10	-	101996913	101997059	---	---	---	---	---	---	---	---	---	---	---	---	---	---	main		CWF19L1	CHUK 7537bp;
TC17000242.hg.1	SNORA59B	small nucleolar RNA, H/ACA box 59B	noncoding	0.0027513	0.169	76.24	236.51	0.32	down	17p11.2	NR_003022	RefSeq // ENSEMBL // RefSeq	Homo sapiens small nucleolar RNA, H/ACA box 59B (SNORA59B), small nucleolar RNA. // ncrna:snoRNA chromosome:GRCh37:17:19460873:19461024:1 gene:ENSG00000238977 gene_biotype:snoRNA transcript_biotype:snoRNA // Homo sapiens small nucleolar RNA, H/ACA box 59A (SNORA59A), small nucleolar RNA.	chr17	+	19460873	19461024	---	---	---	---	---	---	---	---	---	---	---	---	---	---	main		SLC47A1
TC6_mcf_hap5000046.hg.1	HCP5	HLA complex P5 (non-protein coding)	noncoding	0.0214043	0.304	26.06	81.56	0.32	down	6p21.3	NR_040662	RefSeq // Havana transcript // Havana transcript	Homo sapiens HLA complex P5 (non-protein coding) (HCP5), non-coding RNA. // cdna:all chromosome:VEGA50:6-MCF:2721242:2722705:1 Gene:OTTHUMG00000149480 // cdna:all chromosome:VEGA50:6-MCF:2721242:2722705:1 Gene:OTTHUMG00000149480	chr6_mcf_hap5	+	2811904	2813367	GO:0006952	defense response	traceable author statement	---	---	---	---	---	---	---	---	---	---	---	main
TC02001417.hg.1	SCARNA6	small Cajal body-specific RNA 6	noncoding	0.0014003	0.138	116.56	348.78	0.33	down	2q37.1	NR_003006	RefSeq // ENSEMBL // UCSC Genes	Homo sapiens small Cajal body-specific RNA 6 (SCARNA6), guide RNA. // ncrna:snoRNA chromosome:GRCh37:2:234197322:234197586:1 gene:ENSG00000251791 gene_biotype:snoRNA transcript_biotype:snoRNA // ---	chr2	+	234197322	234197587	---	---	---	---	---	---	---	---	---	---	---	---	---	---	main		ATG16L1
TC16001253.hg.1	SNORD71	small nucleolar RNA, C/D box 71	noncoding	0.0047854	0.201	333.86	1019.87	0.33	down	16q22.2	NR_003059	RefSeq // ENSEMBL // UCSC Genes	Homo sapiens small nucleolar RNA, C/D box 71 (SNORD71), small nucleolar RNA. // ncrna:snoRNA chromosome:GRCh37:16:71792305:71792390:-1 gene:ENSG00000223224 gene_biotype:snoRNA transcript_biotype:snoRNA // ---	chr16	-	71792305	71792390	---	---	---	---	---	---	---	---	---	---	---	---	---	---	main		AP1G1
TC02003893.hg.1	---	accn=AY077738 class=scaRNA name=U88 ref=NONCODE v2.0 transcriptId=NULL cpcScore=-1.5906100 cnci=-0.2343171	noncoding	0.0018151	0.147	109.84	320.1	0.34	down	---	n3892	NONCODE	accn=AY077738 class=scaRNA name=U88 ref=NONCODE v2.0 transcriptId=NULL cpcScore=-1.5906100 cnci=-0.2343171	chr2	+	234197322	234197587	---	---	---	---	---	---	---	---	---	---	---	---	---	---	main		ATG16L1
TC14000919.hg.1	SNORD8	small nucleolar RNA, C/D box 8	noncoding	0.003358	0.182	132.14	385.32	0.34	down	14q11.2	NR_002916	RefSeq // ENSEMBL // UCSC Genes	Homo sapiens small nucleolar RNA, C/D box 8 (SNORD8), small nucleolar RNA. // ncrna:snoRNA chromosome:GRCh37:14:21865451:21865560:-1 gene:ENSG00000200785 gene_biotype:snoRNA transcript_biotype:snoRNA // ---	chr14	-	21865451	21865560	---	---	---	---	---	---	---	---	---	---	---	---	---	---	main		CHD8
TC18000522.hg.1	SNORA37	small nucleolar RNA, H/ACA box 37	noncoding	0.0005049	0.109	139.46	406.27	0.34	down	18q21.2	NR_002970	RefSeq // ENSEMBL // UCSC Genes	Homo sapiens small nucleolar RNA, H/ACA box 37 (SNORA37), small nucleolar RNA. // ncrna:snoRNA chromosome:GRCh37:18:51748654:51748782:-1 gene:ENSG00000207233 gene_biotype:snoRNA transcript_biotype:snoRNA // ---	chr18	-	51748654	51748782	---	---	---	---	---	---	---	---	---	---	---	---	---	---	main		MBD2
TC02001255.hg.1	---	ncrna:snoRNA chromosome:GRCh37:2:215711671:215711805:1 gene:ENSG00000207274 gene_biotype:snoRNA transcript_biotype:snoRNA	noncoding	1.09e-05	0.0388	234.15	673.07	0.35	down	---	ENST00000384544	ENSEMBL	ncrna:snoRNA chromosome:GRCh37:2:215711671:215711805:1 gene:ENSG00000207274 gene_biotype:snoRNA transcript_biotype:snoRNA	chr2	+	215711671	215711805	---	---	---	---	---	---	---	---	---	---	---	---	---	---	main
TC14000880.hg.1	---	ncrna:snoRNA chromosome:GRCh37:14:20791338:20791485:-1 gene:ENSG00000222489 gene_biotype:snoRNA transcript_biotype:snoRNA	noncoding	0.0020195	0.153	208.93	599.38	0.35	down	---	ENST00000410557	ENSEMBL // UCSC Genes	ncrna:snoRNA chromosome:GRCh37:14:20791338:20791485:-1 gene:ENSG00000222489 gene_biotype:snoRNA transcript_biotype:snoRNA // ---	chr14	-	20791338	20791485	---	---	---	---	---	---	---	---	---	---	---	---	---	---	main		CCNB1IP1
TC6_dbb_hap3000062.hg.1	SNORA38	small nucleolar RNA, H/ACA box 38	noncoding	0.0121698	0.262	38.22	109.62	0.35	down	6p21.33	NR_002971	RefSeq // UCSC Genes	Homo sapiens small nucleolar RNA, H/ACA box 38 (SNORA38), small nucleolar RNA. // ---	chr6_dbb_hap3	+	2876431	2876562	---	---	---	---	---	---	---	---	---	---	---	---	---	---	main	AIF1 6058bp;	PRRC2A
TC6_mcf_hap5000057.hg.1	SNORA38	small nucleolar RNA, H/ACA box 38	noncoding	0.0121698	0.262	38.22	109.62	0.35	down	6p21.33	NR_002971	RefSeq // UCSC Genes	Homo sapiens small nucleolar RNA, H/ACA box 38 (SNORA38), small nucleolar RNA. // ---	chr6_mcf_hap5	+	2970549	2970680	---	---	---	---	---	---	---	---	---	---	---	---	---	---	main	AIF1 6057bp;	PRRC2A
TC02001416.hg.1	SCARNA5	small Cajal body-specific RNA 5	noncoding	0.0051968	0.206	211.01	579.37	0.36	down	2q37.1	NR_003008	RefSeq // ENSEMBL // UCSC Genes	Homo sapiens small Cajal body-specific RNA 5 (SCARNA5), guide RNA. // ncrna:snoRNA chromosome:GRCh37:2:234184373:234184648:1 gene:ENSG00000252010 gene_biotype:snoRNA transcript_biotype:snoRNA // ---	chr2	+	234184372	234184649	---	---	---	---	---	---	---	---	---	---	---	---	---	---	main		ATG16L1
TC02001189.hg.1	SNORD70	small nucleolar RNA, C/D box 70	noncoding	0.0043875	0.194	53.2	143.45	0.37	down	2q33.1	NR_003058	RefSeq // ENSEMBL // UCSC Genes	Homo sapiens small nucleolar RNA, C/D box 70 (SNORD70), small nucleolar RNA. // ncrna:snoRNA chromosome:GRCh37:2:203141154:203141241:1 gene:ENSG00000212534 gene_biotype:snoRNA transcript_biotype:snoRNA // ---	chr2	+	203141154	203141241	---	---	---	---	---	---	---	---	---	---	---	---	---	---	main		NOP58
TC07000478.hg.1	SNORA14A	small nucleolar RNA, H/ACA box 14A	noncoding	0.0359292	0.351	63.07	170.45	0.37	down	7q11.23	NR_002955	RefSeq // ENSEMBL // UCSC Genes	Homo sapiens small nucleolar RNA, H/ACA box 14A (SNORA14A), small nucleolar RNA. // ncrna:snoRNA chromosome:GRCh37:7:75573100:75573234:1 gene:ENSG00000201643 gene_biotype:snoRNA transcript_biotype:snoRNA // ---	chr7	+	75573100	75573234	---	---	---	---	---	---	---	---	---	---	---	---	---	---	main		POR
TC14000798.hg.1	SNORA28	small nucleolar RNA, H/ACA box 28	noncoding	0.0086	0.236	13.26	35.8	0.37	down	14q32.32	NR_002964	RefSeq // ENSEMBL // UCSC Genes	Homo sapiens small nucleolar RNA, H/ACA box 28 (SNORA28), small nucleolar RNA. // ncrna:snoRNA chromosome:GRCh37:14:103804186:103804311:1 gene:ENSG00000207315 gene_biotype:snoRNA transcript_biotype:snoRNA // ---	chr14	+	103804186	103804311	---	---	---	---	---	---	---	---	---	---	---	---	---	---	main		EIF5
TC14000881.hg.1	SNORD126	small nucleolar RNA, C/D box 126	noncoding	0.005504	0.21	11.92	32.6	0.37	down	14q11.2	NR_003693	RefSeq // ENSEMBL // UCSC Genes	Homo sapiens small nucleolar RNA, C/D box 126 (SNORD126), small nucleolar RNA. // ncrna:snoRNA chromosome:GRCh37:14:20794609:20794685:-1 gene:ENSG00000238344 gene_biotype:snoRNA transcript_biotype:snoRNA // ---	chr14	-	20794600	20794698	---	---	---	---	---	---	---	---	---	---	---	---	---	---	main		CCNB1IP1
TC16001373.hg.1	---	accn=AF180951 class=mRNAlike lncRNA name=NULL ref=H-invitational v7.5 transcriptId=HIT000072807 cpcScore=4.7364600 cnci=-0.1839000	noncoding	6.37e-05	0.0742	78.18	210.91	0.37	down	---	n333033	NONCODE	accn=AF180951 class=mRNAlike lncRNA name=NULL ref=H-invitational v7.5 transcriptId=HIT000072807 cpcScore=4.7364600 cnci=-0.1839000	chr16	+	816054	818865	---	---	---	---	---	---	---	---	---	---	---	---	---	---	main		MSLN
TC17000992.hg.1	SNORD91B	small nucleolar RNA, C/D box 91B	noncoding	0.0056018	0.211	261.97	700.18	0.37	down	17p13.3	NR_003073	RefSeq // ENSEMBL // UCSC Genes	Homo sapiens small nucleolar RNA, C/D box 91B (SNORD91B), small nucleolar RNA. // ncrna:snoRNA chromosome:GRCh37:17:2232413:2232507:-1 gene:ENSG00000212552 gene_biotype:snoRNA transcript_biotype:snoRNA // ---	chr17	-	2232413	2232507	---	---	---	---	---	---	---	---	---	---	---	---	---	---	main		TSR1
TC02003892.hg.1	---	accn=AY077737 class=scaRNA name=U87 ref=NONCODE v2.0 transcriptId=NULL cpcScore=-1.5906100 cnci=-0.3106881	noncoding	0.0064512	0.217	181.03	480.41	0.38	down	---	n3891	NONCODE	accn=AY077737 class=scaRNA name=U87 ref=NONCODE v2.0 transcriptId=NULL cpcScore=-1.5906100 cnci=-0.3106881	chr2	+	234184372	234184649	---	---	---	---	---	---	---	---	---	---	---	---	---	---	main		ATG16L1
TC18000504.hg.1	SNORD58C	small nucleolar RNA, C/D box 58C	noncoding	0.0056449	0.211	38.21	101.13	0.38	down	18q21.1	NR_003701	RefSeq // ENSEMBL // UCSC Genes	Homo sapiens small nucleolar RNA, C/D box 58C (SNORD58C), small nucleolar RNA. // ncrna:snoRNA chromosome:GRCh37:18:47015615:47015678:-1 gene:ENSG00000202093 gene_biotype:snoRNA transcript_biotype:snoRNA // ---	chr18	-	47015605	47015694	---	---	---	---	---	---	---	---	---	---	---	---	---	---	main			C18orf32 1961bp;
TC01003327.hg.1	SCARNA4	small Cajal body-specific RNA 4	noncoding	0.00532	0.208	82.37	209.82	0.39	down	1q22	NR_003005	RefSeq // ENSEMBL // UCSC Genes	Homo sapiens small Cajal body-specific RNA 4 (SCARNA4), guide RNA. // ncrna:snoRNA chromosome:GRCh37:1:155895749:155895877:-1 gene:ENSG00000252808 gene_biotype:snoRNA transcript_biotype:snoRNA // ---	chr1	-	155895749	155895877	---	---	---	---	---	---	---	---	---	---	---	---	---	---	main		KIAA0907
TC05001505.hg.1	SNORA47	small nucleolar RNA, H/ACA box 47	noncoding	0.0016262	0.144	254.86	660	0.39	down	5q13.3	NR_003014	RefSeq // ENSEMBL // UCSC Genes	Homo sapiens small nucleolar RNA, H/ACA box 47 (SNORA47), small nucleolar RNA. // ncrna:snoRNA chromosome:GRCh37:5:76376259:76376396:-1 gene:ENSG00000238961 gene_biotype:snoRNA transcript_biotype:snoRNA // ---	chr5	-	76376259	76376396	---	---	---	---	---	---	---	---	---	---	---	---	---	---	main		ZBED3
TC03001957.hg.1	SCARNA7	small Cajal body-specific RNA 7	noncoding	0.0040269	0.19	276.46	686.07	0.4	down	3q25.22	NR_003001	RefSeq // ENSEMBL // UCSC Genes	Homo sapiens small Cajal body-specific RNA 7 (SCARNA7), guide RNA. // ncrna:snoRNA chromosome:GRCh37:3:160232695:160233024:-1 gene:ENSG00000238741 gene_biotype:snoRNA transcript_biotype:snoRNA // ---	chr3	-	160232695	160233024	---	---	---	---	---	---	---	---	---	---	---	---	---	---	main		KPNA4
TC0X000324.hg.1	SNORA11	small nucleolar RNA, H/ACA box 11	noncoding	0.0202458	0.301	60.89	154.1	0.4	down	Xp11.21	NR_002953	RefSeq // ENSEMBL // UCSC Genes	Homo sapiens small nucleolar RNA, H/ACA box 11 (SNORA11), small nucleolar RNA. // ncrna:snoRNA chromosome:GRCh37:X:54840803:54840930:1 gene:ENSG00000221716 gene_biotype:snoRNA transcript_biotype:snoRNA // ---	chrX	+	54840803	54840933	---	---	---	---	---	---	---	---	---	---	---	---	---	---	main		MAGED2
TC20001671.hg.1	---	accn=AJ308021 class=mRNAlike lncRNA name=NULL ref=H-invitational v7.5 transcriptId=HIT000246970 cpcScore=-1.3785700 cnci=-0.2220721	noncoding	0.0139357	0.273	85.54	212.54	0.4	down	---	n334841	NONCODE	accn=AJ308021 class=mRNAlike lncRNA name=NULL ref=H-invitational v7.5 transcriptId=HIT000246970 cpcScore=-1.3785700 cnci=-0.2220721	chr20	-	56224550	56224992	---	---	---	---	---	---	---	---	---	---	---	---	---	---	main		PMEPA1
TC03003185.hg.1	---	accn=AY077740 class=scaRNA name=U90 ref=NONCODE v2.0 transcriptId=NULL cpcScore=-1.5906100 cnci=-0.6129707	noncoding	0.003751	0.186	313.67	770.3	0.41	down	---	n3894	NONCODE	accn=AY077740 class=scaRNA name=U90 ref=NONCODE v2.0 transcriptId=NULL cpcScore=-1.5906100 cnci=-0.6129707	chr3	-	160232695	160233024	---	---	---	---	---	---	---	---	---	---	---	---	---	---	main		KPNA4
TC06000375.hg.1	SNORA38	small nucleolar RNA, H/ACA box 38	noncoding	0.0216728	0.305	75.15	181.25	0.41	down	6p21.33	NR_002971	RefSeq // ENSEMBL // UCSC Genes	Homo sapiens small nucleolar RNA, H/ACA box 38 (SNORA38), small nucleolar RNA. // ncrna:snoRNA chromosome:GRCh37:6:31590856:31590987:1 gene:ENSG00000200816 gene_biotype:snoRNA transcript_biotype:snoRNA // ---	chr6	+	31590856	31590987	---	---	---	---	---	---	---	---	---	---	---	---	---	---	main	AIF1 6058bp;	PRRC2A
TC08001459.hg.1	SNORA72	small nucleolar RNA, H/ACA box 72	noncoding	0.0008834	0.125	24.91	61.48	0.41	down	8q22	NR_002581	RefSeq // ENSEMBL // UCSC Genes	Homo sapiens small nucleolar RNA, H/ACA box 72 (SNORA72), small nucleolar RNA. // ncrna:snoRNA chromosome:GRCh37:8:99054314:99054445:-1 gene:ENSG00000207067 gene_biotype:snoRNA transcript_biotype:snoRNA // ---	chr8	-	99054314	99054445	---	---	---	---	---	---	---	---	---	---	---	---	---	---	main		RPL30		SNORA72
TC09000934.hg.1	SCARNA8	small Cajal body-specific RNA 8	noncoding	0.0108017	0.253	22.62	54.69	0.41	down	9p22.1	NR_003009	RefSeq // ENSEMBL // UCSC Genes	Homo sapiens small Cajal body-specific RNA 8 (SCARNA8), guide RNA. // ncrna:snoRNA chromosome:GRCh37:9:19063654:19063784:-1 gene:ENSG00000251733 gene_biotype:snoRNA transcript_biotype:snoRNA // ---	chr9	-	19063654	19063784	---	---	---	---	---	---	---	---	---	---	---	---	---	---	main		HAUS6
TC14001369.hg.1	SNORA79	small nucleolar RNA, H/ACA box 79	noncoding	0.0208065	0.304	30.3	73.51	0.41	down	14q31.1	NR_003021	RefSeq // ENSEMBL // UCSC Genes	Homo sapiens small nucleolar RNA, H/ACA box 79 (SNORA79), small nucleolar RNA. // ncrna:snoRNA chromosome:GRCh37:14:81669039:81669178:-1 gene:ENSG00000221303 gene_biotype:snoRNA transcript_biotype:snoRNA // ---	chr14	-	81669039	81669178	---	---	---	---	---	---	---	---	---	---	---	---	---	---	main		GTF2A1
TC6_cox_hap2000071.hg.1	SNORA38	small nucleolar RNA, H/ACA box 38	noncoding	0.0216728	0.305	75.15	181.25	0.41	down	6p21.33	NR_002971	RefSeq // UCSC Genes	Homo sapiens small nucleolar RNA, H/ACA box 38 (SNORA38), small nucleolar RNA. // ---	chr6_cox_hap2	+	3100470	3100601	---	---	---	---	---	---	---	---	---	---	---	---	---	---	main	AIF1 6054bp;	PRRC2A
TC6_mann_hap4000062.hg.1	SNORA38	small nucleolar RNA, H/ACA box 38	noncoding	0.0216728	0.305	75.15	181.25	0.41	down	6p21.33	NR_002971	RefSeq // UCSC Genes	Homo sapiens small nucleolar RNA, H/ACA box 38 (SNORA38), small nucleolar RNA. // ---	chr6_mann_hap4	+	2933737	2933868	---	---	---	---	---	---	---	---	---	---	---	---	---	---	main		PRRC2A
TC6_qbl_hap6000062.hg.1	SNORA38	small nucleolar RNA, H/ACA box 38	noncoding	0.0216728	0.305	75.15	181.25	0.41	down	6p21.33	NR_002971	RefSeq // UCSC Genes	Homo sapiens small nucleolar RNA, H/ACA box 38 (SNORA38), small nucleolar RNA. // ---	chr6_qbl_hap6	+	2884494	2884625	---	---	---	---	---	---	---	---	---	---	---	---	---	---	main	AIF1 6055bp;	PRRC2A
TC6_ssto_hap7000058.hg.1	SNORA38	small nucleolar RNA, H/ACA box 38	noncoding	0.0216728	0.305	75.15	181.25	0.41	down	6p21.33	NR_002971	RefSeq // UCSC Genes	Homo sapiens small nucleolar RNA, H/ACA box 38 (SNORA38), small nucleolar RNA. // ---	chr6_ssto_hap7	+	2921656	2921787	---	---	---	---	---	---	---	---	---	---	---	---	---	---	main	AIF1 6051bp;	PRRC2A
TC06001529.hg.1	SNORD117	small nucleolar RNA, C/D box 117	noncoding	0.0053711	0.208	359.74	850.15	0.42	down	6p21.33	NR_003140	RefSeq // ENSEMBL // UCSC Genes	Homo sapiens small nucleolar RNA, C/D box 117 (SNORD117), small nucleolar RNA. // ncrna:snoRNA chromosome:GRCh37:6:31504151:31504226:-1 gene:ENSG00000201785 gene_biotype:snoRNA transcript_biotype:snoRNA // ---	chr6	-	31504151	31504226	---	---	---	---	---	---	---	---	---	---	---	---	---	---	main	ATP6V1G2 8002bp;	DDX39B
TC07001584.hg.1	---	ncrna:snoRNA chromosome:GRCh37:7:88078407:88078546:-1 gene:ENSG00000207094 gene_biotype:snoRNA transcript_biotype:snoRNA	noncoding	0.0008476	0.124	26.34	62.98	0.42	down	---	ENST00000384366	ENSEMBL // UCSC Genes	ncrna:snoRNA chromosome:GRCh37:7:88078407:88078546:-1 gene:ENSG00000207094 gene_biotype:snoRNA transcript_biotype:snoRNA // ---	chr7	-	88078407	88078546	---	---	---	---	---	---	---	---	---	---	---	---	---	---	main
TC09000101.hg.1	---	ncrna:snoRNA chromosome:GRCh37:9:20786926:20787054:1 gene:ENSG00000202189 gene_biotype:snoRNA transcript_biotype:snoRNA	noncoding	0.0052043	0.206	77.61	185.18	0.42	down	---	ENST00000365319	ENSEMBL // UCSC Genes	ncrna:snoRNA chromosome:GRCh37:9:20786926:20787054:1 gene:ENSG00000202189 gene_biotype:snoRNA transcript_biotype:snoRNA // ---	chr9	+	20786926	20787054	---	---	---	---	---	---	---	---	---	---	---	---	---	---	main		FOCAD
TC12001052.hg.1	SNORA49	small nucleolar RNA, H/ACA box 49	noncoding	0.0004396	0.107	277.14	658.56	0.42	down	12q24.33	NR_002979	RefSeq // ENSEMBL // UCSC Genes	Homo sapiens small nucleolar RNA, H/ACA box 49 (SNORA49), small nucleolar RNA. // ncrna:snoRNA chromosome:GRCh37:12:132515769:132515904:1 gene:ENSG00000208892 gene_biotype:snoRNA transcript_biotype:snoRNA // ---	chr12	+	132515769	132515905	---	---	---	---	---	---	---	---	---	---	---	---	---	---	main		EP400
TC6_apd_hap1000080.hg.1	SNORD117	small nucleolar RNA, C/D box 117	noncoding	0.0053711	0.208	359.74	850.15	0.42	down	6p21.33	NR_003140	RefSeq // UCSC Genes	Homo sapiens small nucleolar RNA, C/D box 117 (SNORD117), small nucleolar RNA. // ---	chr6_apd_hap1	-	2818839	2818914	---	---	---	---	---	---	---	---	---	---	---	---	---	---	main		DDX39B
TC6_cox_hap2000158.hg.1	SNORD117	small nucleolar RNA, C/D box 117	noncoding	0.0053711	0.208	359.74	850.15	0.42	down	6p21.33	NR_003140	RefSeq // UCSC Genes	Homo sapiens small nucleolar RNA, C/D box 117 (SNORD117), small nucleolar RNA. // ---	chr6_cox_hap2	-	3013813	3013888	---	---	---	---	---	---	---	---	---	---	---	---	---	---	main	ATP6V1G2 7999bp;	DDX39B
TC6_dbb_hap3000147.hg.1	SNORD117	small nucleolar RNA, C/D box 117	noncoding	0.0053711	0.208	359.74	850.15	0.42	down	6p21.33	NR_003140	RefSeq // UCSC Genes	Homo sapiens small nucleolar RNA, C/D box 117 (SNORD117), small nucleolar RNA. // ---	chr6_dbb_hap3	-	2789731	2789806	---	---	---	---	---	---	---	---	---	---	---	---	---	---	main	ATP6V1G2 8000bp;	DDX39B
TC6_mann_hap4000135.hg.1	SNORD117	small nucleolar RNA, C/D box 117	noncoding	0.0053711	0.208	359.74	850.15	0.42	down	6p21.33	NR_003140	RefSeq // UCSC Genes	Homo sapiens small nucleolar RNA, C/D box 117 (SNORD117), small nucleolar RNA. // ---	chr6_mann_hap4	-	2847065	2847140	---	---	---	---	---	---	---	---	---	---	---	---	---	---	main	ATP6V1G2 7984bp;	DDX39B
TC6_mcf_hap5000135.hg.1	SNORD117	small nucleolar RNA, C/D box 117	noncoding	0.0053711	0.208	359.74	850.15	0.42	down	6p21.33	NR_003140	RefSeq // UCSC Genes	Homo sapiens small nucleolar RNA, C/D box 117 (SNORD117), small nucleolar RNA. // ---	chr6_mcf_hap5	-	2883901	2883976	---	---	---	---	---	---	---	---	---	---	---	---	---	---	main	ATP6V1G2 7999bp;	DDX39B
TC6_qbl_hap6000150.hg.1	SNORD117	small nucleolar RNA, C/D box 117	noncoding	0.0053711	0.208	359.74	850.15	0.42	down	6p21.33	NR_003140	RefSeq // UCSC Genes	Homo sapiens small nucleolar RNA, C/D box 117 (SNORD117), small nucleolar RNA. // ---	chr6_qbl_hap6	-	2797831	2797906	---	---	---	---	---	---	---	---	---	---	---	---	---	---	main	ATP6V1G2 7997bp;	DDX39B
TC6_ssto_hap7000130.hg.1	SNORD117	small nucleolar RNA, C/D box 117	noncoding	0.0053711	0.208	359.74	850.15	0.42	down	6p21.33	NR_003140	RefSeq // UCSC Genes	Homo sapiens small nucleolar RNA, C/D box 117 (SNORD117), small nucleolar RNA. // ---	chr6_ssto_hap7	-	2834956	2835031	---	---	---	---	---	---	---	---	---	---	---	---	---	---	main	ATP6V1G2 8002bp;	DDX39B
TC07001352.hg.1	SNORA5A	small nucleolar RNA, H/ACA box 5A	noncoding	0.0030085	0.175	115.85	270.04	0.43	down	7p13	NR_002919	RefSeq // ENSEMBL // UCSC Genes	Homo sapiens small nucleolar RNA, H/ACA box 5A (SNORA5A), small nucleolar RNA. // ncrna:snoRNA chromosome:GRCh37:7:45143948:45144081:-1 gene:ENSG00000206838 gene_biotype:snoRNA transcript_biotype:snoRNA // ---	chr7	-	45143948	45144081	---	---	---	---	---	---	---	---	---	---	---	---	---	---	main		TBRG4
TC14002133.hg.1	---	accn=AF238978 class=mRNAlike lncRNA name=NULL ref=H-invitational v7.5 transcriptId=HIT000074786 cpcScore=1.1415600 cnci=-0.0678661	noncoding	0.0015625	0.142	739.17	1718.16	0.43	down	---	n333054	NONCODE	accn=AF238978 class=mRNAlike lncRNA name=NULL ref=H-invitational v7.5 transcriptId=HIT000074786 cpcScore=1.1415600 cnci=-0.0678661	chr14	-	94594109	94594939	---	---	---	---	---	---	---	---	---	---	---	---	---	---	main		IFI27L2
TC0X001889.hg.1	---	accn=NR_027621 class=lncRNA name= ref=RefGeneNoncode transcriptId=NR_027621 cpcScore=2.4650300 cnci=-0.2564994 | accn=U60118 class=mRNAlike lncRNA name=NULL ref=H-invitational v7.5 transcriptId=HIT000220620 cpcScore=1.5601100 cnci=-0.0910365	noncoding	0.0005326	0.111	36.74	83.69	0.44	down	---	n407932	NONCODE // NONCODE	accn=NR_027621 class=lncRNA name= ref=RefGeneNoncode transcriptId=NR_027621 cpcScore=2.4650300 cnci=-0.2564994 // accn=U60118 class=mRNAlike lncRNA name=NULL ref=H-invitational v7.5 transcriptId=HIT000220620 cpcScore=1.5601100 cnci=-0.0910365	chrX	+	135228861	135293518	---	---	---	---	---	---	---	---	---	---	---	---	---	---	main		FHL1
TC12001454.hg.1	SNORA2A	small nucleolar RNA, H/ACA box 2A	noncoding	0.0169544	0.287	19.92	45.73	0.44	down	12q13.11	NR_002950	RefSeq // ENSEMBL // UCSC Genes	Homo sapiens small nucleolar RNA, H/ACA box 2A (SNORA2A), small nucleolar RNA. // ncrna:snoRNA chromosome:GRCh37:12:49050431:49050565:-1 gene:ENSG00000206612 gene_biotype:snoRNA transcript_biotype:snoRNA // ---	chr12	-	49050431	49050565	---	---	---	---	---	---	---	---	---	---	---	---	---	---	main		KANSL2
TC19000162.hg.1	---	ncrna:snoRNA chromosome:GRCh37:19:9930630:9930770:1 gene:ENSG00000200237 gene_biotype:snoRNA transcript_biotype:snoRNA	noncoding	6.2e-06	0.0388	82.16	187.26	0.44	down	---	ENST00000363367	ENSEMBL	ncrna:snoRNA chromosome:GRCh37:19:9930630:9930770:1 gene:ENSG00000200237 gene_biotype:snoRNA transcript_biotype:snoRNA	chr19	+	9930630	9930770	---	---	---	---	---	---	---	---	---	---	---	---	---	---	main			UBL5 7786bp;
TC01003326.hg.1	SNORA42	small nucleolar RNA, H/ACA box 42	noncoding	0.0157942	0.281	187.52	412.87	0.45	down	1q22	NR_002974	RefSeq // ENSEMBL // UCSC Genes	Homo sapiens small nucleolar RNA, H/ACA box 42 (SNORA42), small nucleolar RNA. // ncrna:snoRNA chromosome:GRCh37:1:155889700:155889836:-1 gene:ENSG00000207475 gene_biotype:snoRNA transcript_biotype:snoRNA // ---	chr1	-	155889700	155889836	---	---	---	---	---	---	---	---	---	---	---	---	---	---	main		KIAA0907	RIT1 8505bp;
TC01006223.hg.1	---	linc-ZP4-1 chr1:-:238643685-238649317	noncoding	0.0035054	0.183	21.99	49.32	0.45	down	---	TCONS_00000027-XLOC_001272	Rinn lincRNAs	linc-ZP4-1 chr1:-:238643685-238649317	chr1	-	238643686	238649317	---	---	---	---	---	---	---	---	---	---	---	---	---	---	main
TC02000880.hg.1	---	ncrna:snoRNA chromosome:GRCh37:2:135894198:135894325:1 gene:ENSG00000208308 gene_biotype:snoRNA transcript_biotype:snoRNA	noncoding	0.0027605	0.169	99.03	220.32	0.45	down	---	ENST00000385573	ENSEMBL	ncrna:snoRNA chromosome:GRCh37:2:135894198:135894325:1 gene:ENSG00000208308 gene_biotype:snoRNA transcript_biotype:snoRNA	chr2	+	135894198	135894325	---	---	---	---	---	---	---	---	---	---	---	---	---	---	main		RAB3GAP1
TC07000399.hg.1	SNORA22	small nucleolar RNA, H/ACA box 22	noncoding	0.0193593	0.297	590.67	1310.28	0.45	down	7q11.21	NR_002961	RefSeq // ENSEMBL // UCSC Genes	Homo sapiens small nucleolar RNA, H/ACA box 22 (SNORA22), small nucleolar RNA. // ncrna:snoRNA chromosome:GRCh37:7:65220513:65220646:1 gene:ENSG00000206634 gene_biotype:snoRNA transcript_biotype:snoRNA // ---	chr7	+	65220513	65220646	---	---	---	---	---	---	---	---	---	---	---	---	---	---	main
TC0X002294.hg.1	---	accn=S58359 class=mRNAlike lncRNA name=NULL ref=H-invitational v7.5 transcriptId=HIT000215871 cpcScore=0.7102960 cnci=-0.0866813	noncoding	0.0005137	0.11	682.65	1526.91	0.45	down	---	n334213	NONCODE	accn=S58359 class=mRNAlike lncRNA name=NULL ref=H-invitational v7.5 transcriptId=HIT000215871 cpcScore=0.7102960 cnci=-0.0866813	chrX	-	153764207	153775148	---	---	---	---	---	---	---	---	---	---	---	---	---	---	main		G6PD		IKBKG
TC10001565.hg.1	---	ncrna:misc_RNA chromosome:GRCh37:10:99180952:99181064:-1 gene:ENSG00000200737 gene_biotype:misc_RNA transcript_biotype:misc_RNA	noncoding	0.0015516	0.142	103.84	233.11	0.45	down	---	ENST00000363867	ENSEMBL	ncrna:misc_RNA chromosome:GRCh37:10:99180952:99181064:-1 gene:ENSG00000200737 gene_biotype:misc_RNA transcript_biotype:misc_RNA	chr10	-	99180952	99181064	---	---	---	---	---	---	---	---	---	---	---	---	---	---	main	EXOSC1 9864bp;
TC15001564.hg.1	---	ncrna:snoRNA chromosome:GRCh37:15:65577799:65577929:-1 gene:ENSG00000206903 gene_biotype:snoRNA transcript_biotype:snoRNA	noncoding	0.0007772	0.121	99.78	219.54	0.45	down	---	ENST00000384176	ENSEMBL	ncrna:snoRNA chromosome:GRCh37:15:65577799:65577929:-1 gene:ENSG00000206903 gene_biotype:snoRNA transcript_biotype:snoRNA	chr15	-	65577799	65577929	---	---	---	---	---	---	---	---	---	---	---	---	---	---	main		PARP16
TC06000725.hg.1	---	ncrna:miRNA chromosome:GRCh37:6:72294792:72294904:1 gene:ENSG00000211530 gene_biotype:miRNA transcript_biotype:miRNA	noncoding	0.0003165	0.104	193.23	419.45	0.46	down	---	ENST00000390196	ENSEMBL	ncrna:miRNA chromosome:GRCh37:6:72294792:72294904:1 gene:ENSG00000211530 gene_biotype:miRNA transcript_biotype:miRNA	chr6	+	72294792	72294904	---	---	---	---	---	---	---	---	---	---	---	---	---	---	main
TC0X000121.hg.1	SCARNA23	small Cajal body-specific RNA 23	noncoding	0.0100675	0.247	14.16	31.03	0.46	down	Xp22.11	NR_003007	RefSeq // ENSEMBL // UCSC Genes	Homo sapiens small Cajal body-specific RNA 23 (SCARNA23), guide RNA. // ncrna:snoRNA chromosome:GRCh37:X:24762558:24762687:1 gene:ENSG00000251869 gene_biotype:snoRNA transcript_biotype:snoRNA // ---	chrX	+	24762558	24762687	---	---	---	---	---	---	---	---	---	---	---	---	---	---	main		POLA1
TC16001621.hg.1	---	accn=NR_027910 class=lncRNA name= ref=RefGeneNoncode transcriptId=NR_027910 cpcScore=4.8343200 cnci=-0.1397603	noncoding	0.0013617	0.137	177.05	382.87	0.46	down	---	n408065	NONCODE	accn=NR_027910 class=lncRNA name= ref=RefGeneNoncode transcriptId=NR_027910 cpcScore=4.8343200 cnci=-0.1397603	chr16	+	71392616	71424342	---	---	---	---	---	---	---	---	---	---	---	---	---	---	main		CALB2
TC19001055.hg.1	SNORD37	small nucleolar RNA, C/D box 37	noncoding	0.0041119	0.191	36.24	79.02	0.46	down	19p13.3	NR_002602	RefSeq // ENSEMBL // UCSC Genes	Homo sapiens small nucleolar RNA, C/D box 37 (SNORD37), small nucleolar RNA. // ncrna:snoRNA chromosome:GRCh37:19:3982505:3982570:-1 gene:ENSG00000206775 gene_biotype:snoRNA transcript_biotype:snoRNA // ---	chr19	-	3982505	3982570	---	---	---	---	---	---	---	---	---	---	---	---	---	---	main		EEF2
TC20000814.hg.1	---	cdna:known chromosome:GRCh37:20:35177530:35232932:-1 gene:ENSG00000259716 gene_biotype:antisense transcript_biotype:antisense	noncoding	0.0166771	0.286	155.44	334.36	0.46	down	---	ENST00000561134	ENSEMBL	cdna:known chromosome:GRCh37:20:35177530:35232932:-1 gene:ENSG00000259716 gene_biotype:antisense transcript_biotype:antisense	chr20	-	35177530	35232932	---	---	---	---	---	---	---	---	---	---	---	---	---	---	main	SLA2 7789bp;			MYL9 TGIF2
TC01002448.hg.1	SNORD85	small nucleolar RNA, C/D box 85	noncoding	0.0013475	0.137	17.39	37	0.47	down	1p35.2	NR_003066	RefSeq // ENSEMBL // UCSC Genes	Homo sapiens small nucleolar RNA, C/D box 85 (SNORD85), small nucleolar RNA. // ncrna:snoRNA chromosome:GRCh37:1:31441011:31441083:-1 gene:ENSG00000200181 gene_biotype:snoRNA transcript_biotype:snoRNA // ---	chr1	-	31441010	31441084	---	---	---	---	---	---	---	---	---	---	---	---	---	---	main		PUM1
TC01004013.hg.1	LOC339535	uncharacterized LOC339535	noncoding	0.0019573	0.151	20.84	44.52	0.47	down	1q43	NR_015407	RefSeq // ENSEMBL // UCSC Genes // Havana transcript	Homo sapiens uncharacterized LOC339535 (LOC339535), non-coding RNA. // ensembl_havana_lincrna:lincRNA chromosome:GRCh37:1:238643684:238649323:-1 gene:ENSG00000215808 gene_biotype:lincRNA transcript_biotype:processed_transcript // --- // cdna:all chromosome:VEGA50:1:238643684:238649323:-1 Gene:OTTHUMG00000039532	chr1	-	238643684	238649323	---	---	---	---	---	---	---	---	---	---	---	---	---	---	main
TC04000299.hg.1	SNORA26	small nucleolar RNA, H/ACA box 26	noncoding	8.87e-05	0.083	68.21	146.39	0.47	down	4q12	NR_003016	RefSeq // ENSEMBL // UCSC Genes	Homo sapiens small nucleolar RNA, H/ACA box 26 (SNORA26), small nucleolar RNA. // ncrna:snoRNA chromosome:GRCh37:4:53579416:53579537:1 gene:ENSG00000212588 gene_biotype:snoRNA transcript_biotype:snoRNA // ---	chr4	+	53579416	53579537	---	---	---	---	---	---	---	---	---	---	---	---	---	---	main
TC07000339.hg.1	---	ncrna:snoRNA chromosome:GRCh37:7:56123058:56123195:1 gene:ENSG00000206603 gene_biotype:snoRNA transcript_biotype:snoRNA	noncoding	0.04314	0.369	75.78	162.83	0.47	down	---	ENST00000383876	ENSEMBL // UCSC Genes	ncrna:snoRNA chromosome:GRCh37:7:56123058:56123195:1 gene:ENSG00000206603 gene_biotype:snoRNA transcript_biotype:snoRNA // ---	chr7	+	56123058	56123195	---	---	---	---	---	---	---	---	---	---	---	---	---	---	main		CCT6A	SUMF2 8500bp;
TC0X002297.hg.1	---	linc-CLIC2-2 chrX:-:154644931-154649138	noncoding	0.0007037	0.118	8.97	19.07	0.47	down	---	TCONS_00017391-XLOC_008269	Rinn lincRNAs	linc-CLIC2-2 chrX:-:154644931-154649138	chrX	-	154644932	154649138	---	---	---	---	---	---	---	---	---	---	---	---	---	---	main
TC10001401.hg.1	---	ncrna:snoRNA chromosome:GRCh37:10:74885838:74885965:-1 gene:ENSG00000221164 gene_biotype:snoRNA transcript_biotype:snoRNA	noncoding	0.0068106	0.222	85.22	180.24	0.47	down	---	ENST00000408237	ENSEMBL // UCSC Genes	ncrna:snoRNA chromosome:GRCh37:10:74885838:74885965:-1 gene:ENSG00000221164 gene_biotype:snoRNA transcript_biotype:snoRNA // ---	chr10	-	74885838	74885965	---	---	---	---	---	---	---	---	---	---	---	---	---	---	main	ECD 3948bp; ECD 7449bp;			NUDT13
TC11001288.hg.1	SNORA54	small nucleolar RNA, H/ACA box 54	noncoding	0.0112998	0.256	94.19	198.66	0.47	down	11p15.4	NR_002982	RefSeq // ENSEMBL // UCSC Genes	Homo sapiens small nucleolar RNA, H/ACA box 54 (SNORA54), small nucleolar RNA. // ncrna:snoRNA chromosome:GRCh37:11:2985001:2985123:-1 gene:ENSG00000207008 gene_biotype:snoRNA transcript_biotype:snoRNA // ---	chr11	-	2985001	2985123	---	---	---	---	---	---	---	---	---	---	---	---	---	---	main		NAP1L4
TC12001453.hg.1	SNORA34	small nucleolar RNA, H/ACA box 34	noncoding	0.0008358	0.124	179.27	380.03	0.47	down	12q13.11	NR_002968	RefSeq // RefSeq // ENSEMBL // UCSC Genes	Homo sapiens small nucleolar RNA, H/ACA box 34 (SNORA34), small nucleolar RNA. // Homo sapiens microRNA 1291 (MIR1291), microRNA. // ncrna:snoRNA chromosome:GRCh37:12:49048165:49048301:-1 gene:ENSG00000221491 gene_biotype:snoRNA transcript_biotype:snoRNA // ---	chr12	-	49048165	49048313	---	---	---	---	---	---	---	---	---	---	---	---	---	---	main		KANSL2
TC03002520.hg.1	---	accn=X87832 class=mRNAlike lncRNA name=Human lncRNA ref=JounralRNA transcriptId=1962 cpcScore=19.2526000 cnci=-0.1192334	noncoding	0.0026417	0.167	356.8	750.86	0.48	down	---	n339521	NONCODE	accn=X87832 class=mRNAlike lncRNA name=Human lncRNA ref=JounralRNA transcriptId=1962 cpcScore=19.2526000 cnci=-0.1192334	chr3	+	126707502	126751326	---	---	---	---	---	---	---	---	---	---	---	---	---	---	main		PLXNA1
TC04000600.hg.1	SNORA24	small nucleolar RNA, H/ACA box 24	noncoding	0.0008844	0.125	682.53	1410.14	0.48	down	4q26	NR_002963	RefSeq // ENSEMBL // UCSC Genes	Homo sapiens small nucleolar RNA, H/ACA box 24 (SNORA24), small nucleolar RNA. // ncrna:snoRNA chromosome:GRCh37:4:119200345:119200475:1 gene:ENSG00000206823 gene_biotype:snoRNA transcript_biotype:snoRNA // ---	chr4	+	119200345	119200475	---	---	---	---	---	---	---	---	---	---	---	---	---	---	main
TC06002707.hg.1	---	accn=AJ223602 class=mRNAlike lncRNA name=NULL ref=H-invitational v7.5 transcriptId=HIT000244843 cpcScore=-1.3328700 cnci=-0.1659887	noncoding	0.0001242	0.0849	166.62	346.25	0.48	down	---	n334772	NONCODE	accn=AJ223602 class=mRNAlike lncRNA name=NULL ref=H-invitational v7.5 transcriptId=HIT000244843 cpcScore=-1.3328700 cnci=-0.1659887	chr6	+	31323945	31324734	---	---	---	---	---	---	---	---	---	---	---	---	---	---	main				HLA-B
TC07000389.hg.1	---	ncrna:snoRNA chromosome:GRCh37:7:64526377:64526510:1 gene:ENSG00000207344 gene_biotype:snoRNA transcript_biotype:snoRNA	noncoding	0.0261275	0.324	197.09	410.89	0.48	down	---	ENST00000384614	ENSEMBL	ncrna:snoRNA chromosome:GRCh37:7:64526377:64526510:1 gene:ENSG00000207344 gene_biotype:snoRNA transcript_biotype:snoRNA	chr7	+	64526377	64526510	---	---	---	---	---	---	---	---	---	---	---	---	---	---	main
TC07001698.hg.1	---	ncrna:snoRNA chromosome:GRCh37:7:101837356:101837444:-1 gene:ENSG00000252824 gene_biotype:snoRNA transcript_biotype:snoRNA	noncoding	0.0065518	0.219	8.15	16.99	0.48	down	---	ENST00000517015	ENSEMBL	ncrna:snoRNA chromosome:GRCh37:7:101837356:101837444:-1 gene:ENSG00000252824 gene_biotype:snoRNA transcript_biotype:snoRNA	chr7	-	101837356	101837444	---	---	---	---	---	---	---	---	---	---	---	---	---	---	main				CUX1
TC0X002292.hg.1	---	accn=NR_033237 class=lncRNA name= ref=RefGeneNoncode transcriptId=NR_033237 cpcScore=4.5312400 cnci=-0.1412856	noncoding	0.0029018	0.171	176.93	368.47	0.48	down	---	n409107	NONCODE	accn=NR_033237 class=lncRNA name= ref=RefGeneNoncode transcriptId=NR_033237 cpcScore=4.5312400 cnci=-0.1412856	chrX	-	153733327	153744566	---	---	---	---	---	---	---	---	---	---	---	---	---	---	main		FAM3A
TC11000031.hg.1	SNORA52	small nucleolar RNA, H/ACA box 52	noncoding	0.0110791	0.255	328.92	681.94	0.48	down	11p15	NR_002585	RefSeq // ENSEMBL // UCSC Genes	Homo sapiens small nucleolar RNA, H/ACA box 52 (SNORA52), small nucleolar RNA. // ncrna:snoRNA chromosome:GRCh37:11:811681:811814:1 gene:ENSG00000199785 gene_biotype:snoRNA transcript_biotype:snoRNA // ---	chr11	+	811681	811814	---	---	---	---	---	---	---	---	---	---	---	---	---	---	main		RPLP2	PNPLA2 7087bp;
TC16001574.hg.1	---	accn=Y18213 class=mRNAlike lncRNA name=NULL ref=H-invitational v7.5 transcriptId=HIT000326074 cpcScore=1.7554800 cnci=-0.0731155	noncoding	0.0052981	0.208	81.97	170.27	0.48	down	---	n336300	NONCODE	accn=Y18213 class=mRNAlike lncRNA name=NULL ref=H-invitational v7.5 transcriptId=HIT000326074 cpcScore=1.7554800 cnci=-0.0731155	chr16	+	56374758	56377888	---	---	---	---	---	---	---	---	---	---	---	---	---	---	main		GNAO1
TC17000121.hg.1	SCARNA21	small Cajal body-specific RNA 21	noncoding	0.0161936	0.282	174.38	363.2	0.48	down	17p13.1	NR_003000	RefSeq // ENSEMBL // UCSC Genes	Homo sapiens small Cajal body-specific RNA 21 (SCARNA21), guide RNA. // ncrna:snoRNA chromosome:GRCh37:17:7809440:7809578:1 gene:ENSG00000252835 gene_biotype:snoRNA transcript_biotype:snoRNA // ---	chr17	+	7809440	7809578	---	---	---	---	---	---	---	---	---	---	---	---	---	---	main		CHD3
TC19000345.hg.1	SNORA68	small nucleolar RNA, H/ACA box 68	noncoding	0.0050123	0.204	716.19	1489.4	0.48	down	19p13	NR_000012	RefSeq // ENSEMBL // UCSC Genes	Homo sapiens small nucleolar RNA, H/ACA box 68 (SNORA68), small nucleolar RNA. // ncrna:snoRNA chromosome:GRCh37:19:17973397:17973529:1 gene:ENSG00000207166 gene_biotype:snoRNA transcript_biotype:snoRNA // ---	chr19	+	17973397	17973529	---	---	---	---	---	---	---	---	---	---	---	---	---	---	main		RPL18A	SLC5A5 9253bp;
TC01001087.hg.1	---	ncrna:snRNA chromosome:GRCh37:1:145382757:145382920:1 gene:ENSG00000201558 gene_biotype:snRNA transcript_biotype:snRNA	noncoding	0.0066735	0.22	209.53	424.34	0.49	down	---	ENST00000364688	ENSEMBL	ncrna:snRNA chromosome:GRCh37:1:145382757:145382920:1 gene:ENSG00000201558 gene_biotype:snRNA transcript_biotype:snRNA	chr1	+	145382757	145382920	---	---	---	---	---	---	---	---	---	---	---	---	---	---	main
TC01004600.hg.1	---	accn=NULL class=snoRNA name=small cajal body specific RNA (scaRNA) mgU2-25/61 ref=fRNAdb v3.0 transcriptId=FR337126 cpcScore=-1.5906100 cnci=-0.2770367	noncoding	0.0112781	0.256	217.05	442.81	0.49	down	---	n203786	NONCODE	accn=NULL class=snoRNA name=small cajal body specific RNA (scaRNA) mgU2-25/61 ref=fRNAdb v3.0 transcriptId=FR337126 cpcScore=-1.5906100 cnci=-0.2770367	chr1	+	109642815	109643234	---	---	---	---	---	---	---	---	---	---	---	---	---	---	main	TMEM167B 3259bp;
TC04000019.hg.1	---	ncrna:snoRNA chromosome:GRCh37:4:1112672:1112801:1 gene:ENSG00000212458 gene_biotype:snoRNA transcript_biotype:snoRNA	noncoding	0.0016702	0.145	38.92	79.33	0.49	down	---	ENST00000391156	ENSEMBL	ncrna:snoRNA chromosome:GRCh37:4:1112672:1112801:1 gene:ENSG00000212458 gene_biotype:snoRNA transcript_biotype:snoRNA	chr4	+	1112672	1112801	---	---	---	---	---	---	---	---	---	---	---	---	---	---	main
TC05000402.hg.1	RNU5E-1	RNA, U5E small nuclear 1	noncoding	0.0001554	0.0937	281.99	570.08	0.49	down	1p36.22	NR_002754	RefSeq // RefSeq // UCSC Genes	Homo sapiens RNA, U5E small nuclear 1 (RNU5E-1), small nuclear RNA. // Homo sapiens RNA, U5D small nuclear 1 (RNU5D-1), small nuclear RNA. // ---	chr5	+	80501462	80746718	---	---	---	---	---	---	---	---	---	---	---	---	---	---	main		CKMT2 RASGRF2 ZCCHC9		ACOT12 SSBP2
TC14001911.hg.1	---	accn=X15624 class=mRNAlike lncRNA name=Human lncRNA ref=JounralRNA transcriptId=597 cpcScore=1.9922000 cnci=-0.0912219	noncoding	0.0023795	0.162	1101.32	2268.8	0.49	down	---	n338205	NONCODE	accn=X15624 class=mRNAlike lncRNA name=Human lncRNA ref=JounralRNA transcriptId=597 cpcScore=1.9922000 cnci=-0.0912219	chr14	-	20811230	20811567	---	---	---	---	---	---	---	---	---	---	---	---	---	---	main			CCNB1IP1 9773bp;
TC16001156.hg.1	SNORA50	small nucleolar RNA, H/ACA box 50	noncoding	0.0123309	0.263	163.67	335.12	0.49	down	16q21	NR_002980	RefSeq // ENSEMBL // UCSC Genes	Homo sapiens small nucleolar RNA, H/ACA box 50 (SNORA50), small nucleolar RNA. // ncrna:snoRNA chromosome:GRCh37:16:58593700:58593833:-1 gene:ENSG00000206952 gene_biotype:snoRNA transcript_biotype:snoRNA // ---	chr16	-	58593700	58593835	---	---	---	---	---	---	---	---	---	---	---	---	---	---	main		CNOT1
TC16001251.hg.1	SNORA70D	small nucleolar RNA, H/ACA box 70D	noncoding	0.0001753	0.0941	50.27	102.63	0.49	down	16q22.3	NR_033337	RefSeq // ENSEMBL // UCSC Genes	Homo sapiens small nucleolar RNA, H/ACA box 70D (SNORA70D), small nucleolar RNA. // ncrna:snoRNA chromosome:GRCh37:16:71732470:71732604:-1 gene:ENSG00000207471 gene_biotype:snoRNA transcript_biotype:snoRNA // ---	chr16	-	71732470	71732604	---	---	---	---	---	---	---	---	---	---	---	---	---	---	main		PHLPP2
TC17001729.hg.1	MIR142	microRNA 142	noncoding	0.0044538	0.196	7.19	14.69	0.49	down	17q22	NR_029683	RefSeq // ENSEMBL // UCSC Genes	Homo sapiens microRNA 142 (MIR142), microRNA. // ncrna:miRNA chromosome:GRCh37:17:56408593:56408679:-1 gene:ENSG00000207567 gene_biotype:miRNA transcript_biotype:miRNA // ---	chr17	-	56408593	56408679	---	---	---	---	---	---	---	---	---	---	---	---	---	---	main			BZRAP1 2441bp;
TC01003990.hg.1	SNORA14B	small nucleolar RNA, H/ACA box 14B	noncoding	0.0361161	0.351	158.25	313.83	0.5	down	1q42.3	NR_002956	RefSeq // ENSEMBL // UCSC Genes	Homo sapiens small nucleolar RNA, H/ACA box 14B (SNORA14B), small nucleolar RNA. // ncrna:snoRNA chromosome:GRCh37:1:235291118:235291252:-1 gene:ENSG00000207181 gene_biotype:snoRNA transcript_biotype:snoRNA // ---	chr1	-	235291118	235291252	---	---	---	---	---	---	---	---	---	---	---	---	---	---	main	RBM34 3246bp;	TOMM20
TC06002278.hg.1	SNORA20	small nucleolar RNA, H/ACA box 20	noncoding	0.0011682	0.135	188.94	377.16	0.5	down	6q25.3	NR_002960	RefSeq // ENSEMBL // UCSC Genes	Homo sapiens small nucleolar RNA, H/ACA box 20 (SNORA20), small nucleolar RNA. // ncrna:snoRNA chromosome:GRCh37:6:160201282:160201413:-1 gene:ENSG00000207392 gene_biotype:snoRNA transcript_biotype:snoRNA // ---	chr6	-	160201282	160201413	---	---	---	---	---	---	---	---	---	---	---	---	---	---	main
TC09001026.hg.1	SNORD121A	small nucleolar RNA, C/D box 121A	noncoding	0.035214	0.35	10.55	21.21	0.5	down	9p13.3	NR_003685	RefSeq // ENSEMBL // UCSC Genes	Homo sapiens small nucleolar RNA, C/D box 121A (SNORD121A), small nucleolar RNA. // ncrna:snoRNA chromosome:GRCh37:9:33952767:33952848:-1 gene:ENSG00000238886 gene_biotype:snoRNA transcript_biotype:snoRNA // ---	chr9	-	33952762	33952852	---	---	---	---	---	---	---	---	---	---	---	---	---	---	main		UBAP2
TC0X000788.hg.1	MIR1184-2	microRNA 1184-2	noncoding	0.0007252	0.118	185.45	373.04	0.5	down	---	ENST00000408676	ENSEMBL	ncrna:miRNA chromosome:GRCh37:X:154687178:154687276:1 gene:ENSG00000221603 gene_biotype:miRNA transcript_biotype:miRNA	chrX	+	154687178	154687276	---	---	---	---	---	---	---	---	---	---	---	---	---	---	main			LOC100507404 8355bp;	F8A2
TC0X001548.hg.1	MIR1184-1	microRNA 1184-1	noncoding	0.0007252	0.118	185.45	373.04	0.5	down	---	NR_036049	RefSeq // ENSEMBL // RefSeq	Homo sapiens microRNA 1184-1 (MIR1184-1), microRNA. // ncrna:miRNA chromosome:GRCh37:X:154115635:154115733:-1 gene:ENSG00000221533 gene_biotype:miRNA transcript_biotype:miRNA // Homo sapiens microRNA 1184-2 (MIR1184-2), microRNA.	chrX	-	154115635	154115733	---	---	---	---	---	---	---	---	---	---	---	---	---	---	main		F8		F8A2
TC0X001553.hg.1	MIR1184-2	microRNA 1184-2	noncoding	0.0007252	0.118	185.45	373.04	0.5	down	---	ENST00000408263	ENSEMBL	ncrna:miRNA chromosome:GRCh37:X:154612749:154612847:-1 gene:ENSG00000221190 gene_biotype:miRNA transcript_biotype:miRNA	chrX	-	154612749	154612847	---	---	---	---	---	---	---	---	---	---	---	---	---	---	main				F8A2
TC17000132.hg.1	MIR4521	microRNA 4521	noncoding	0.0015972	0.144	243.95	486.77	0.5	down	---	NR_039746	RefSeq // UCSC Genes	Homo sapiens microRNA 4521 (MIR4521), microRNA. // ---	chr17	+	8090263	8090322	---	---	---	---	---	---	---	---	---	---	---	---	---	---	main
TC02001190.hg.1	SNORD11B	small nucleolar RNA, C/D box 11B	noncoding	0.0013967	0.138	25	49.47	0.51	down	2q33.1	NR_003694	RefSeq // ENSEMBL // UCSC Genes	Homo sapiens small nucleolar RNA, C/D box 11B (SNORD11B), small nucleolar RNA. // ncrna:snoRNA chromosome:GRCh37:2:203156058:203156141:1 gene:ENSG00000238505 gene_biotype:snoRNA transcript_biotype:snoRNA // ---	chr2	+	203156040	203156151	---	---	---	---	---	---	---	---	---	---	---	---	---	---	main		NOP58
TC05001834.hg.1	SNORD63	small nucleolar RNA, C/D box 63	noncoding	0.0155772	0.28	296.62	581.22	0.51	down	5q31.2	NR_002913	RefSeq // ENSEMBL // UCSC Genes	Homo sapiens small nucleolar RNA, C/D box 63 (SNORD63), small nucleolar RNA. // ncrna:snoRNA chromosome:GRCh37:5:137896732:137896799:-1 gene:ENSG00000206989 gene_biotype:snoRNA transcript_biotype:snoRNA // ---	chr5	-	137896732	137896799	---	---	---	---	---	---	---	---	---	---	---	---	---	---	main		HSPA9
TC06000622.hg.1	---	ncrna:snRNA chromosome:GRCh37:6:45613841:45613912:1 gene:ENSG00000252738 gene_biotype:snRNA transcript_biotype:snRNA	noncoding	0.006074	0.214	45.82	90.18	0.51	down	---	ENST00000516929	ENSEMBL	ncrna:snRNA chromosome:GRCh37:6:45613841:45613912:1 gene:ENSG00000252738 gene_biotype:snRNA transcript_biotype:snRNA	chr6	+	45613841	45613912	---	---	---	---	---	---	---	---	---	---	---	---	---	---	main
TC08000260.hg.1	---	ncrna:snoRNA chromosome:GRCh37:8:33397558:33397655:1 gene:ENSG00000252505 gene_biotype:snoRNA transcript_biotype:snoRNA	noncoding	0.0053598	0.208	178.73	347.38	0.51	down	---	ENST00000516696	ENSEMBL	ncrna:snoRNA chromosome:GRCh37:8:33397558:33397655:1 gene:ENSG00000252505 gene_biotype:snoRNA transcript_biotype:snoRNA	chr8	+	33397558	33397655	---	---	---	---	---	---	---	---	---	---	---	---	---	---	main
TC08000315.hg.1	---	ncrna:snoRNA chromosome:GRCh37:8:41284174:41284246:1 gene:ENSG00000238936 gene_biotype:snoRNA transcript_biotype:snoRNA	noncoding	0.0076329	0.229	11.57	22.62	0.51	down	---	ENST00000459126	ENSEMBL	ncrna:snoRNA chromosome:GRCh37:8:41284174:41284246:1 gene:ENSG00000238936 gene_biotype:snoRNA transcript_biotype:snoRNA	chr8	+	41284174	41284246	---	---	---	---	---	---	---	---	---	---	---	---	---	---	main
TC17001438.hg.1	SNORA21	small nucleolar RNA, H/ACA box 21	noncoding	0.0007566	0.12	807.29	1570.38	0.51	down	17q12	NR_002576	RefSeq // ENSEMBL // UCSC Genes	Homo sapiens small nucleolar RNA, H/ACA box 21 (SNORA21), small nucleolar RNA. // ncrna:snoRNA chromosome:GRCh37:17:37009116:37009247:-1 gene:ENSG00000199293 gene_biotype:snoRNA transcript_biotype:snoRNA // ---	chr17	-	37009116	37009248	---	---	---	---	---	---	---	---	---	---	---	---	---	---	main		RPL23
TC17002651.hg.1	---	accn=DQ396626 class=mRNAlike lncRNA name=NULL ref=H-invitational v7.5 transcriptId=HIT000343122 cpcScore=1.2440200 cnci=-0.1370356	noncoding	1.02e-05	0.0388	214.91	422.95	0.51	down	---	n337085	NONCODE	accn=DQ396626 class=mRNAlike lncRNA name=NULL ref=H-invitational v7.5 transcriptId=HIT000343122 cpcScore=1.2440200 cnci=-0.1370356	chr17	-	41610638	41622768	---	---	---	---	---	---	---	---	---	---	---	---	---	---	main		ETV4
TC19001389.hg.1	---	ncrna:snoRNA chromosome:GRCh37:19:33099243:33099375:-1 gene:ENSG00000201388 gene_biotype:snoRNA transcript_biotype:snoRNA	noncoding	0.0142627	0.275	26.43	51.55	0.51	down	---	ENST00000364518	ENSEMBL	ncrna:snoRNA chromosome:GRCh37:19:33099243:33099375:-1 gene:ENSG00000201388 gene_biotype:snoRNA transcript_biotype:snoRNA	chr19	-	33099243	33099375	---	---	---	---	---	---	---	---	---	---	---	---	---	---	main		ANKRD27
TC20000838.hg.1	SNORA71B	small nucleolar RNA, H/ACA box 71B	noncoding	0.0053429	0.208	217.59	427.35	0.51	down	20q11.23	NR_002910	RefSeq // ENSEMBL // ENSEMBL // UCSC Genes // Havana transcript	Homo sapiens small nucleolar RNA, H/ACA box 71B (SNORA71B), small nucleolar RNA. // ncrna:snoRNA chromosome:GRCh37:20:37053846:37053979:-1 gene:ENSG00000201416 gene_biotype:snoRNA transcript_biotype:snoRNA // havana:non_coding chromosome:GRCh37:20:37053843:37053978:-1 gene:ENSG00000235408 gene_biotype:non_coding transcript_biotype:non_coding // --- // cdna:all chromosome:VEGA50:20:37053843:370539…	chr20	-	37053843	37053979	---	---	---	---	---	---	---	---	---	---	---	---	---	---	main
TC20000841.hg.1	SNORA71D	small nucleolar RNA, H/ACA box 71D	noncoding	0.0016838	0.145	398.01	775.95	0.51	down	20q11.23	NR_003018	RefSeq // ENSEMBL // UCSC Genes	Homo sapiens small nucleolar RNA, H/ACA box 71D (SNORA71D), small nucleolar RNA. // ncrna:snoRNA chromosome:GRCh37:20:37062508:37062641:-1 gene:ENSG00000200354 gene_biotype:snoRNA transcript_biotype:snoRNA // ---	chr20	-	37062505	37062642	---	---	---	---	---	---	---	---	---	---	---	---	---	---	main
TC22000805.hg.1	SNORD83A	small nucleolar RNA, C/D box 83A	noncoding	0.0078173	0.231	42.99	84.46	0.51	down	22q13	NR_000027	RefSeq // ENSEMBL	Homo sapiens small nucleolar RNA, C/D box 83A (SNORD83A), small nucleolar RNA. // ncrna:snoRNA chromosome:GRCh37:22:39711218:39711312:-1 gene:ENSG00000209482 gene_biotype:snoRNA transcript_biotype:snoRNA	chr22	-	39711218	39711312	---	---	---	---	---	---	---	---	---	GenMAPP	Ribosomal_Proteins	---	---	---	main
TC01000295.hg.1	---	ncrna:snRNA chromosome:GRCh37:1:23490446:23490546:1 gene:ENSG00000252578 gene_biotype:snRNA transcript_biotype:snRNA	noncoding	0.0014984	0.14	27.16	51.99	0.52	down	---	ENST00000516769	ENSEMBL // UCSC Genes	ncrna:snRNA chromosome:GRCh37:1:23490446:23490546:1 gene:ENSG00000252578 gene_biotype:snRNA transcript_biotype:snRNA // ---	chr1	+	23490446	23490546	---	---	---	---	---	---	---	---	---	---	---	---	---	---	main				LUZP1
TC01000938.hg.1	SCARNA2	small Cajal body-specific RNA 2	noncoding	0.0143683	0.276	196.65	378.18	0.52	down	1q13.1	NR_003023	RefSeq // ENSEMBL // UCSC Genes	Homo sapiens small Cajal body-specific RNA 2 (SCARNA2), guide RNA. // ncrna:snoRNA chromosome:GRCh37:1:109642815:109643234:1 gene:ENSG00000238881 gene_biotype:snoRNA transcript_biotype:snoRNA // ---	chr1	+	109642815	109643234	---	---	---	---	---	---	---	---	---	---	---	---	---	---	main	TMEM167B 3259bp;
TC05000734.hg.1	VTRNA1-1	vault RNA 1-1	noncoding	0.0118799	0.26	40.49	78.54	0.52	down	5q31.3	NR_026703	RefSeq // ENSEMBL // UCSC Genes	Homo sapiens vault RNA 1-1 (VTRNA1-1), vault RNA. // ncrna:misc_RNA chromosome:GRCh37:5:140090860:140090958:1 gene:ENSG00000199990 gene_biotype:misc_RNA transcript_biotype:misc_RNA // ---	chr5	+	140090860	140090958	---	---	---	---	---	---	---	---	---	---	---	---	---	---	main	ZMAT2 4594bp;
TC06002799.hg.1	---	accn=BC019867 class=mRNAlike lncRNA name=NULL ref=H-invitational v7.5 transcriptId=HIT000089980 cpcScore=-0.8090740 cnci=-1.0000000 | accn=BC011177 class=mRNAlike lncRNA name=NULL ref=H-invitational v7.5 transcriptId=HIT000087603 cpcScore=1.8911800 cnci=-0.0723185	noncoding	0.0352866	0.35	220.9	425.28	0.52	down	---	n333449	NONCODE // NONCODE	accn=BC019867 class=mRNAlike lncRNA name=NULL ref=H-invitational v7.5 transcriptId=HIT000089980 cpcScore=-0.8090740 cnci=-1.0000000 // accn=BC011177 class=mRNAlike lncRNA name=NULL ref=H-invitational v7.5 transcriptId=HIT000087603 cpcScore=1.8911800 cnci=-0.0723185	chr6	+	43737962	43739182	---	---	---	---	---	---	---	---	---	---	---	---	---	---	main		VEGFA
TC08001850.hg.1	---	accn=AY429564 class=mRNAlike lncRNA name=NULL ref=H-invitational v7.5 transcriptId=HIT000254652 cpcScore=2.3851800 cnci=-0.1431999	noncoding	0.0027147	0.168	56.91	109.45	0.52	down	---	n335188	NONCODE	accn=AY429564 class=mRNAlike lncRNA name=NULL ref=H-invitational v7.5 transcriptId=HIT000254652 cpcScore=2.3851800 cnci=-0.1431999	chr8	+	27288405	27293825	---	---	---	---	---	---	---	---	---	---	---	---	---	---	main		PTK2B
TC09001670.hg.1	---	ncrna:snoRNA chromosome:GRCh37:9:134658247:134658345:-1 gene:ENSG00000212395 gene_biotype:snoRNA transcript_biotype:snoRNA	noncoding	0.0145886	0.277	93.96	180.88	0.52	down	---	ENST00000391093	ENSEMBL	ncrna:snoRNA chromosome:GRCh37:9:134658247:134658345:-1 gene:ENSG00000212395 gene_biotype:snoRNA transcript_biotype:snoRNA	chr9	-	134658247	134658345	---	---	---	---	---	---	---	---	---	---	---	---	---	---	main
TC0X001928.hg.1	---	accn=NR_037927 class=lncRNA name= ref=RefGeneNoncode transcriptId=NR_037927 cpcScore=2.5588700 cnci=-0.0771722	noncoding	0.0012728	0.136	251.65	481.24	0.52	down	---	n410677	NONCODE	accn=NR_037927 class=lncRNA name= ref=RefGeneNoncode transcriptId=NR_037927 cpcScore=2.5588700 cnci=-0.0771722	chrX	+	153059904	153063967	---	---	---	---	---	---	---	---	---	---	---	---	---	---	main	SRPK3 8717bp;	SSR4		IDH3G
TC11000172.hg.1	SNORA23	small nucleolar RNA, H/ACA box 23	noncoding	0.0017297	0.146	1367.48	2612.58	0.52	down	11p15.4	NR_002962	RefSeq // ENSEMBL // UCSC Genes	Homo sapiens small nucleolar RNA, H/ACA box 23 (SNORA23), small nucleolar RNA. // ncrna:snoRNA chromosome:GRCh37:11:9450320:9450501:1 gene:ENSG00000201998 gene_biotype:snoRNA transcript_biotype:snoRNA // ---	chr11	+	9450313	9450501	---	---	---	---	---	---	---	---	---	---	---	---	---	---	main		IPO7
TC12000580.hg.1	---	ncrna:snRNA chromosome:GRCh37:12:65489529:65489635:1 gene:ENSG00000207099 gene_biotype:snRNA transcript_biotype:snRNA	noncoding	0.0093591	0.242	124.8	237.88	0.52	down	---	ENST00000384371	ENSEMBL	ncrna:snRNA chromosome:GRCh37:12:65489529:65489635:1 gene:ENSG00000207099 gene_biotype:snRNA transcript_biotype:snRNA	chr12	+	65489529	65489635	---	---	---	---	---	---	---	---	---	---	---	---	---	---	main				WIF1
TC12000732.hg.1	MIR492	microRNA 492	noncoding	0.0006232	0.116	43	82.26	0.52	down	12q22	NR_030171	RefSeq // RefSeq // ENSEMBL // ENSEMBL // UCSC Genes	Homo sapiens microRNA 492 (MIR492), microRNA. // Homo sapiens keratin 19 pseudogene 2 (KRT19P2), non-coding RNA. // ncrna:miRNA chromosome:GRCh37:12:95228174:95228289:1 gene:ENSG00000208038 gene_biotype:miRNA transcript_biotype:miRNA // cdna:putative chromosome:GRCh37:12:95228230:95228804:1 gene:ENSG00000216306 gene_biotype:pseudogene transcript_biotype:processed_transcript // ---	chr12	+	95228174	95228804	---	---	---	---	---	---	---	---	---	---	---	---	---	---	main
TC15001581.hg.1	SNORD16	small nucleolar RNA, C/D box 16	noncoding	0.014521	0.277	210.93	407.34	0.52	down	15q22	NR_002440	RefSeq // ENSEMBL // UCSC Genes	Homo sapiens small nucleolar RNA, C/D box 16 (SNORD16), small nucleolar RNA. // ncrna:snoRNA chromosome:GRCh37:15:66795150:66795248:-1 gene:ENSG00000199673 gene_biotype:snoRNA transcript_biotype:snoRNA // ---	chr15	-	66795149	66795248	---	---	---	---	---	---	---	---	---	---	---	---	---	---	main		RPL4	SNAPC5 5003bp;
TC17000102.hg.1	SNORD10	small nucleolar RNA, C/D box 10	noncoding	0.0060553	0.214	441.68	845.2	0.52	down	17p13.1	NR_002604	RefSeq // ENSEMBL // UCSC Genes	Homo sapiens small nucleolar RNA, C/D box 10 (SNORD10), small nucleolar RNA. // ncrna:snoRNA chromosome:GRCh37:17:7480129:7480270:1 gene:ENSG00000238917 gene_biotype:snoRNA transcript_biotype:snoRNA // ---	chr17	+	7480129	7480276	---	---	---	---	---	---	---	---	---	---	---	---	---	---	main	SENP3 4842bp;	EIF4A1	CD68 2529bp; MPDU1 6689bp;
TC18000505.hg.1	SNORD58A	small nucleolar RNA, C/D box 58A	noncoding	0.005325	0.208	321.5	612.96	0.52	down	18q21	NR_002571	RefSeq // ENSEMBL // UCSC Genes	Homo sapiens small nucleolar RNA, C/D box 58A (SNORD58A), small nuclear RNA. // ncrna:snoRNA chromosome:GRCh37:18:47017653:47017717:-1 gene:ENSG00000206602 gene_biotype:snoRNA transcript_biotype:snoRNA // ---	chr18	-	47017653	47017717	---	---	---	---	---	---	---	---	---	---	---	---	---	---	main			C18orf32 4009bp;
TC20000388.hg.1	SNORD12B	small nucleolar RNA, C/D box 12B	noncoding	0.0101679	0.248	143.73	277.12	0.52	down	20q13.13	NR_003695	RefSeq // ENSEMBL // UCSC Genes	Homo sapiens small nucleolar RNA, C/D box 12B (SNORD12B), small nucleolar RNA. // ncrna:snoRNA chromosome:GRCh37:20:47896856:47896946:1 gene:ENSG00000222365 gene_biotype:snoRNA transcript_biotype:snoRNA // ---	chr20	+	47896850	47896952	---	---	---	---	---	---	---	---	---	---	---	---	---	---	main
TC21000403.hg.1	---	ncrna:snoRNA chromosome:GRCh37:21:34214171:34214305:-1 gene:ENSG00000207098 gene_biotype:snoRNA transcript_biotype:snoRNA	noncoding	0.0008069	0.123	80.01	154.47	0.52	down	---	ENST00000384370	ENSEMBL	ncrna:snoRNA chromosome:GRCh37:21:34214171:34214305:-1 gene:ENSG00000207098 gene_biotype:snoRNA transcript_biotype:snoRNA	chr21	-	34214171	34214305	---	---	---	---	---	---	---	---	---	---	---	---	---	---	main
TC01000388.hg.1	RNU11	RNA, U11 small nuclear	noncoding	0.0090345	0.239	265.13	500.08	0.53	down	1p35	NR_004407	RefSeq // ENSEMBL // UCSC Genes	Homo sapiens RNA, U11 small nuclear (RNU11), small nuclear RNA. // ncrna:snRNA chromosome:GRCh37:1:28975112:28975245:1 gene:ENSG00000209804 gene_biotype:snRNA transcript_biotype:snRNA // ---	chr1	+	28975112	28975246	---	---	---	---	---	---	---	---	---	---	---	---	---	---	main
TC01001668.hg.1	---	ncrna:snoRNA chromosome:GRCh37:1:201947589:201947723:1 gene:ENSG00000206637 gene_biotype:snoRNA transcript_biotype:snoRNA	noncoding	6.8e-06	0.0388	77.33	146.23	0.53	down	---	ENST00000383910	ENSEMBL	ncrna:snoRNA chromosome:GRCh37:1:201947589:201947723:1 gene:ENSG00000206637 gene_biotype:snoRNA transcript_biotype:snoRNA	chr1	+	201947589	201947723	---	---	---	---	---	---	---	---	---	---	---	---	---	---	main	TIMM17A 7800bp;		RNPEP 3777bp;
TC02000188.hg.1	SNORD92	small nucleolar RNA, C/D box 92	noncoding	0.0497208	0.38	17.46	33.1	0.53	down	2p23.2	NR_003074	RefSeq // UCSC Genes	Homo sapiens small nucleolar RNA, C/D box 92 (SNORD92), small nucleolar RNA. // ---	chr2	+	29136528	29136616	---	---	---	---	---	---	---	---	---	---	---	---	---	---	main		WDR43
TC02001191.hg.1	SNORD11	small nucleolar RNA, C/D box 11	noncoding	0.0279083	0.329	37.18	70.46	0.53	down	2q33.1	NR_003031	RefSeq // ENSEMBL // UCSC Genes	Homo sapiens small nucleolar RNA, C/D box 11 (SNORD11), small nucleolar RNA. // ncrna:snoRNA chromosome:GRCh37:2:203157772:203157859:1 gene:ENSG00000238317 gene_biotype:snoRNA transcript_biotype:snoRNA // ---	chr2	+	203157772	203157859	---	---	---	---	---	---	---	---	---	---	---	---	---	---	main		NOP58
TC03000196.hg.1	---	ncrna:snRNA chromosome:GRCh37:3:39067478:39067584:1 gene:ENSG00000206708 gene_biotype:snRNA transcript_biotype:snRNA	noncoding	0.0252512	0.32	23.36	43.73	0.53	down	---	ENST00000383981	ENSEMBL	ncrna:snRNA chromosome:GRCh37:3:39067478:39067584:1 gene:ENSG00000206708 gene_biotype:snRNA transcript_biotype:snRNA	chr3	+	39067478	39067584	---	---	---	---	---	---	---	---	---	---	---	---	---	---	main
TC03001982.hg.1	TERC	telomerase RNA component	noncoding	0.0443093	0.37	342.45	649.97	0.53	down	3q26	NR_001566	RefSeq // ENSEMBL // UCSC Genes	Homo sapiens telomerase RNA component (TERC), telomerase RNA. // ncrna:misc_RNA chromosome:GRCh37:3:169482398:169482835:-1 gene:ENSG00000200182 gene_biotype:misc_RNA transcript_biotype:misc_RNA // ---	chr3	-	169482398	169482848	---	---	---	---	---	---	---	---	---	---	---	---	---	---	main	ACTRT3 1863bp;
TC05000067.hg.1	SNORD123	small nucleolar RNA, C/D box 123	noncoding	0.0118232	0.26	55.87	104.51	0.53	down	5p15.2	NR_003689	RefSeq // ENSEMBL // UCSC Genes	Homo sapiens small nucleolar RNA, C/D box 123 (SNORD123), small nucleolar RNA. // ncrna:snoRNA chromosome:GRCh37:5:9548948:9549017:1 gene:ENSG00000239112 gene_biotype:snoRNA transcript_biotype:snoRNA // ---	chr5	+	9548939	9549026	---	---	---	---	---	---	---	---	---	---	---	---	---	---	main
TC08000062.hg.1	---	ncrna:snoRNA chromosome:GRCh37:8:8819085:8819218:1 gene:ENSG00000207244 gene_biotype:snoRNA transcript_biotype:snoRNA	noncoding	0.0035242	0.183	21.14	39.56	0.53	down	---	ENST00000384515	ENSEMBL	ncrna:snoRNA chromosome:GRCh37:8:8819085:8819218:1 gene:ENSG00000207244 gene_biotype:snoRNA transcript_biotype:snoRNA	chr8	+	8819085	8819218	---	---	---	---	---	---	---	---	---	---	---	---	---	---	main
TC09001527.hg.1	SNORA70C	small nucleolar RNA, H/ACA box 70C	noncoding	0.0011438	0.134	20.37	38.24	0.53	down	9q33.1	NR_003708	RefSeq // ENSEMBL // UCSC Genes	Homo sapiens small nucleolar RNA, H/ACA box 70C (SNORA70C), small nucleolar RNA. // ncrna:snoRNA chromosome:GRCh37:9:119943345:119943479:-1 gene:ENSG00000207268 gene_biotype:snoRNA transcript_biotype:snoRNA // ---	chr9	-	119943345	119943480	---	---	---	---	---	---	---	---	---	---	---	---	---	---	main		ASTN2
TC12000289.hg.1	---	ncrna:snRNA chromosome:GRCh37:12:31519222:31519300:1 gene:ENSG00000207477 gene_biotype:snRNA transcript_biotype:snRNA	noncoding	0.0183177	0.293	42.2	79.32	0.53	down	---	ENST00000384746	ENSEMBL	ncrna:snRNA chromosome:GRCh37:12:31519222:31519300:1 gene:ENSG00000207477 gene_biotype:snRNA transcript_biotype:snRNA	chr12	+	31519222	31519300	---	---	---	---	---	---	---	---	---	---	---	---	---	---	main
TC12001252.hg.1	---	ncrna:snRNA chromosome:GRCh37:12:12442161:12442263:-1 gene:ENSG00000207010 gene_biotype:snRNA transcript_biotype:snRNA	noncoding	0.0030762	0.176	23.16	43.97	0.53	down	---	ENST00000384283	ENSEMBL	ncrna:snRNA chromosome:GRCh37:12:12442161:12442263:-1 gene:ENSG00000207010 gene_biotype:snRNA transcript_biotype:snRNA	chr12	-	12442161	12442263	---	---	---	---	---	---	---	---	---	---	---	---	---	---	main
TC12001611.hg.1	SNORD59A	small nucleolar RNA, C/D box 59A	noncoding	0.0049215	0.203	262.29	491.45	0.53	down	12p13.3	NR_002737	RefSeq // ENSEMBL // UCSC Genes	Homo sapiens small nucleolar RNA, C/D box 59A (SNORD59A), small nuclear RNA. // ncrna:snoRNA chromosome:GRCh37:12:57038811:57038885:-1 gene:ENSG00000207031 gene_biotype:snoRNA transcript_biotype:snoRNA // ---	chr12	-	57038811	57038885	---	---	---	---	---	---	---	---	---	---	---	---	---	---	main		ATP5B	BAZ2A 8648bp;
TC12001883.hg.1	---	ncrna:snRNA chromosome:GRCh37:12:102265520:102265579:-1 gene:ENSG00000252863 gene_biotype:snRNA transcript_biotype:snRNA	noncoding	0.0339947	0.346	24.6	46.77	0.53	down	---	ENST00000517054	ENSEMBL	ncrna:snRNA chromosome:GRCh37:12:102265520:102265579:-1 gene:ENSG00000252863 gene_biotype:snRNA transcript_biotype:snRNA	chr12	-	102265520	102265579	---	---	---	---	---	---	---	---	---	---	---	---	---	---	main
TC12002202.hg.1	---	accn=AF308283 class=scaRNA name=U85 ref=NONCODE v2.0 transcriptId=NULL cpcScore=-1.5906100 cnci=-0.4071142	noncoding	7.61e-05	0.0816	337.48	634.31	0.53	down	---	n1315	NONCODE	accn=AF308283 class=scaRNA name=U85 ref=NONCODE v2.0 transcriptId=NULL cpcScore=-1.5906100 cnci=-0.4071142	chr12	+	6619388	6619717	---	---	---	---	---	---	---	---	---	---	---	---	---	---	main		NCAPD2
TC14002135.hg.1	---	accn=X05827 class=mRNAlike lncRNA name=NULL ref=H-invitational v7.5 transcriptId=HIT000321150 cpcScore=-0.7809990 cnci=-0.1733302	noncoding	0.0331123	0.343	236.01	444.12	0.53	down	---	n335751	NONCODE	accn=X05827 class=mRNAlike lncRNA name=NULL ref=H-invitational v7.5 transcriptId=HIT000321150 cpcScore=-0.7809990 cnci=-0.1733302	chr14	-	94854898	94857002	---	---	---	---	---	---	---	---	---	---	---	---	---	---	main		SERPINA1
TC19001627.hg.1	MIR642B	microRNA 642b	noncoding	0.0076224	0.229	23.77	44.51	0.53	down	---	NR_037512	RefSeq // UCSC Genes	Homo sapiens microRNA 642b (MIR642B), microRNA. // ---	chr19	-	46178190	46178266	---	---	---	---	---	---	---	---	---	---	---	---	---	---	main				GIPR
TC19001992.hg.1	---	accn=NULL class=lincRNA name=Human lincRNA ref=Scripture Reconstruction LincRNAs By Luo transcriptId=linc_luo_1523 cpcScore=-1.5979500 cnci=-0.0429376	noncoding	0.0024374	0.164	332.32	623.9	0.53	down	---	n345974	NONCODE	accn=NULL class=lincRNA name=Human lincRNA ref=Scripture Reconstruction LincRNAs By Luo transcriptId=linc_luo_1523 cpcScore=-1.5979500 cnci=-0.0429376	chr19	+	12754405	12754799	---	---	---	---	---	---	---	---	---	---	---	---	---	---	main
TC6_cox_hap2000061.hg.1	HCP5	HLA complex P5 (non-protein coding)	noncoding	0.0224834	0.308	54.25	103.18	0.53	down	6p21.3	NR_040662	RefSeq // UCSC Genes // UCSC Genes // GenBank // Havana transcript // Havana transcript	Homo sapiens HLA complex P5 (non-protein coding) (HCP5), non-coding RNA. // --- // --- // Homo sapiens HLA complex P5, mRNA (cDNA clone MGC:120402 IMAGE:40024782), complete cds. // cdna:all chromosome:VEGA50:6-COX:2877113:2879747:1 Gene:OTTHUMG00000031580 // cdna:all chromosome:VEGA50:6-COX:2877123:2879747:1 Gene:OTTHUMG00000031580	chr6_cox_hap2	+	2940606	2943240	GO:0006952 // GO:0006952	defense response // defense response	traceable author statement // traceable author statement	---	---	---	---	---	---	---	---	---	---	---	main
TC02002814.hg.1	---	ncrna:snoRNA chromosome:GRCh37:2:223562615:223562719:-1 gene:ENSG00000238852 gene_biotype:snoRNA transcript_biotype:snoRNA	noncoding	0.0152301	0.278	45.81	85.35	0.54	down	---	ENST00000459212	ENSEMBL	ncrna:snoRNA chromosome:GRCh37:2:223562615:223562719:-1 gene:ENSG00000238852 gene_biotype:snoRNA transcript_biotype:snoRNA	chr2	-	223562615	223562719	---	---	---	---	---	---	---	---	---	---	---	---	---	---	main				MOGAT1
TC04000543.hg.1	---	ncrna:snRNA chromosome:GRCh37:4:106328154:106328249:1 gene:ENSG00000200917 gene_biotype:snRNA transcript_biotype:snRNA	noncoding	0.0119173	0.261	269.38	496.07	0.54	down	---	ENST00000364047	ENSEMBL	ncrna:snRNA chromosome:GRCh37:4:106328154:106328249:1 gene:ENSG00000200917 gene_biotype:snRNA transcript_biotype:snRNA	chr4	+	106328154	106328249	---	---	---	---	---	---	---	---	---	---	---	---	---	---	main				PPA2
TC06000518.hg.1	---	ncrna:snoRNA chromosome:GRCh37:6:35619595:35619722:1 gene:ENSG00000212579 gene_biotype:snoRNA transcript_biotype:snoRNA	noncoding	0.0051783	0.206	19.01	35.25	0.54	down	---	ENST00000391277	ENSEMBL	ncrna:snoRNA chromosome:GRCh37:6:35619595:35619722:1 gene:ENSG00000212579 gene_biotype:snoRNA transcript_biotype:snoRNA	chr6	+	35619595	35619722	---	---	---	---	---	---	---	---	---	---	---	---	---	---	main				FKBP5
TC07000060.hg.1	---	ncrna:snoRNA chromosome:GRCh37:7:6056508:6056642:1 gene:ENSG00000207217 gene_biotype:snoRNA transcript_biotype:snoRNA	noncoding	0.002245	0.16	60.57	111.66	0.54	down	---	ENST00000384488	ENSEMBL	ncrna:snoRNA chromosome:GRCh37:7:6056508:6056642:1 gene:ENSG00000207217 gene_biotype:snoRNA transcript_biotype:snoRNA	chr7	+	6056508	6056642	---	---	---	---	---	---	---	---	---	---	---	---	---	---	main		AIMP2
TC07001801.hg.1	---	ncrna:snRNA chromosome:GRCh37:7:119646030:119646155:-1 gene:ENSG00000194647 gene_biotype:snRNA transcript_biotype:snRNA	noncoding	0.0434712	0.369	250.32	465.29	0.54	down	---	ENST00000350695	ENSEMBL	ncrna:snRNA chromosome:GRCh37:7:119646030:119646155:-1 gene:ENSG00000194647 gene_biotype:snRNA transcript_biotype:snRNA	chr7	-	119646030	119646155	---	---	---	---	---	---	---	---	---	---	---	---	---	---	main
TC11000161.hg.1	SNORA45	small nucleolar RNA, H/ACA box 45	noncoding	0.000752	0.12	207.3	381.02	0.54	down	11p15.4	NR_002977	RefSeq // ENSEMBL // UCSC Genes	Homo sapiens small nucleolar RNA, H/ACA box 45 (SNORA45), small nucleolar RNA. // ncrna:snoRNA chromosome:GRCh37:11:8706986:8707116:1 gene:ENSG00000212607 gene_biotype:snoRNA transcript_biotype:snoRNA // ---	chr11	+	8706986	8707116	---	---	---	---	---	---	---	---	---	---	---	---	---	---	main			SNORA3 3561bp;
TC11003210.hg.1	---	accn=NR_037718 class=lncRNA name= ref=RefGeneNoncode transcriptId=NR_037718 cpcScore=3.3513200 cnci=-0.1597984	noncoding	0.0143491	0.276	163.02	303.44	0.54	down	---	n410551	NONCODE	accn=NR_037718 class=lncRNA name= ref=RefGeneNoncode transcriptId=NR_037718 cpcScore=3.3513200 cnci=-0.1597984	chr11	-	65633912	65640405	---	---	---	---	---	---	---	---	---	---	---	---	---	---	main		EFEMP2	CFL1 5020bp;	MUS81
TC14001319.hg.1	---	ncrna:snRNA chromosome:GRCh37:14:75668784:75668872:-1 gene:ENSG00000252013 gene_biotype:snRNA transcript_biotype:snRNA	noncoding	8.6e-05	0.083	75.83	140.14	0.54	down	---	ENST00000516204	ENSEMBL	ncrna:snRNA chromosome:GRCh37:14:75668784:75668872:-1 gene:ENSG00000252013 gene_biotype:snRNA transcript_biotype:snRNA	chr14	-	75668784	75668872	---	---	---	---	---	---	---	---	---	---	---	---	---	---	main
TC15001809.hg.1	---	ncrna:snoRNA chromosome:GRCh37:15:86716429:86716501:-1 gene:ENSG00000200206 gene_biotype:snoRNA transcript_biotype:snoRNA	noncoding	0.0006314	0.116	10.52	19.42	0.54	down	---	ENST00000363336	ENSEMBL	ncrna:snoRNA chromosome:GRCh37:15:86716429:86716501:-1 gene:ENSG00000200206 gene_biotype:snoRNA transcript_biotype:snoRNA	chr15	-	86716429	86716501	---	---	---	---	---	---	---	---	---	---	---	---	---	---	main				AGBL1
TC16000357.hg.1	SNORA30	small nucleolar RNA, H/ACA box 30	noncoding	0.0003009	0.104	28.08	51.76	0.54	down	16p11.2	NR_002966	RefSeq // ENSEMBL // UCSC Genes	Homo sapiens small nucleolar RNA, H/ACA box 30 (SNORA30), small nucleolar RNA. // ncrna:snoRNA chromosome:GRCh37:16:30721858:30721986:1 gene:ENSG00000206755 gene_biotype:snoRNA transcript_biotype:snoRNA // ---	chr16	+	30721858	30721986	---	---	---	---	---	---	---	---	---	---	---	---	---	---	main		SRCAP
TC6_ssto_hap7000048.hg.1	HCP5	HLA complex P5 (non-protein coding)	noncoding	0.0252399	0.32	51.18	94.37	0.54	down	6p21.3	NR_040662	RefSeq // UCSC Genes // UCSC Genes // GenBank // Havana transcript // Havana transcript	Homo sapiens HLA complex P5 (non-protein coding) (HCP5), non-coding RNA. // --- // --- // Homo sapiens HLA complex P5, mRNA (cDNA clone MGC:120402 IMAGE:40024782), complete cds. // cdna:all chromosome:VEGA50:6-SSTO:2749140:2751774:1 Gene:OTTHUMG00000037036 // cdna:all chromosome:VEGA50:6-SSTO:2749150:2751774:1 Gene:OTTHUMG00000037036	chr6_ssto_hap7	+	2761722	2764356	GO:0006952 // GO:0006952	defense response // defense response	traceable author statement // traceable author statement	---	---	---	---	---	---	---	---	---	---	---	main
TC02000343.hg.1	---	ncrna:snRNA chromosome:GRCh37:2:60611740:60611898:1 gene:ENSG00000200807 gene_biotype:snRNA transcript_biotype:snRNA	noncoding	0.0256513	0.322	216.19	390.91	0.55	down	---	ENST00000363937	ENSEMBL	ncrna:snRNA chromosome:GRCh37:2:60611740:60611898:1 gene:ENSG00000200807 gene_biotype:snRNA transcript_biotype:snRNA	chr2	+	60611740	60611898	---	---	---	---	---	---	---	---	---	---	---	---	---	---	main
TC02001167.hg.1	---	ncrna:snRNA chromosome:GRCh37:2:201694732:201694839:1 gene:ENSG00000207116 gene_biotype:snRNA transcript_biotype:snRNA	noncoding	0.0074686	0.228	520.01	939.97	0.55	down	---	ENST00000384388	ENSEMBL	ncrna:snRNA chromosome:GRCh37:2:201694732:201694839:1 gene:ENSG00000207116 gene_biotype:snRNA transcript_biotype:snRNA	chr2	+	201694732	201694839	---	---	---	---	---	---	---	---	---	---	---	---	---	---	main	BZW1 6163bp;
TC05001554.hg.1	SCARNA18	small Cajal body-specific RNA 18	noncoding	0.0103904	0.249	24.72	44.85	0.55	down	5q14.2	NR_003139	RefSeq // ENSEMBL // UCSC Genes	Homo sapiens small Cajal body-specific RNA 18 (SCARNA18), guide RNA. // ncrna:snoRNA chromosome:GRCh37:5:82360023:82360156:-1 gene:ENSG00000238835 gene_biotype:snoRNA transcript_biotype:snoRNA // ---	chr5	-	82360023	82360156	---	---	---	---	---	---	---	---	---	---	---	---	---	---	main		TMEM167A
TC06002148.hg.1	---	ncrna:snoRNA chromosome:GRCh37:6:137176836:137176969:-1 gene:ENSG00000201807 gene_biotype:snoRNA transcript_biotype:snoRNA	noncoding	0.0271747	0.327	6.39	11.57	0.55	down	---	ENST00000364937	ENSEMBL	ncrna:snoRNA chromosome:GRCh37:6:137176836:137176969:-1 gene:ENSG00000201807 gene_biotype:snoRNA transcript_biotype:snoRNA	chr6	-	137176836	137176969	---	---	---	---	---	---	---	---	---	---	---	---	---	---	main				PEX7
TC12000083.hg.1	SCARNA10	small Cajal body-specific RNA 10	noncoding	0.0005612	0.113	187.14	341.36	0.55	down	12p13.31	NR_004387	RefSeq // ENSEMBL // ENSEMBL // UCSC Genes	Homo sapiens small Cajal body-specific RNA 10 (SCARNA10), guide RNA. // ncrna:snoRNA chromosome:GRCh37:12:6619388:6619717:1 gene:ENSG00000239002 gene_biotype:snoRNA transcript_biotype:snoRNA // havana:ncrna_host chromosome:GRCh37:12:6619441:6619688:1 gene:ENSG00000256329 gene_biotype:ncrna_host transcript_biotype:ncrna_host // ---	chr12	+	6619388	6619717	---	---	---	---	---	---	---	---	---	---	---	---	---	---	main		NCAPD2
TC12000763.hg.1	SNORA53	small nucleolar RNA, H/ACA box 53	noncoding	0.0090762	0.239	39.09	71.38	0.55	down	12q23.1	NR_003015	RefSeq // ENSEMBL // UCSC Genes	Homo sapiens small nucleolar RNA, H/ACA box 53 (SNORA53), small nucleolar RNA. // ncrna:snoRNA chromosome:GRCh37:12:98993413:98993661:1 gene:ENSG00000212443 gene_biotype:snoRNA transcript_biotype:snoRNA // ---	chr12	+	98993413	98993662	---	---	---	---	---	---	---	---	---	---	---	---	---	---	main		SLC25A3
TC12002158.hg.1	---	ncrna:snRNA chromosome:GRCh37:12:133571776:133571888:-1 gene:ENSG00000252269 gene_biotype:snRNA transcript_biotype:snRNA	noncoding	0.0025444	0.166	57.64	104.73	0.55	down	---	ENST00000516460	ENSEMBL	ncrna:snRNA chromosome:GRCh37:12:133571776:133571888:-1 gene:ENSG00000252269 gene_biotype:snRNA transcript_biotype:snRNA	chr12	-	133571776	133571888	---	---	---	---	---	---	---	---	---	---	---	---	---	---	main				ZNF26
TC14001351.hg.1	---	ncrna:misc_RNA chromosome:GRCh37:14:78287373:78287485:-1 gene:ENSG00000199440 gene_biotype:misc_RNA transcript_biotype:misc_RNA	noncoding	0.0004794	0.107	34.87	63.71	0.55	down	---	ENST00000362570	ENSEMBL	ncrna:misc_RNA chromosome:GRCh37:14:78287373:78287485:-1 gene:ENSG00000199440 gene_biotype:misc_RNA transcript_biotype:misc_RNA	chr14	-	78287373	78287485	---	---	---	---	---	---	---	---	---	---	---	---	---	---	main				ADCK1
TC15001582.hg.1	SNORD18A	small nucleolar RNA, C/D box 18A	noncoding	0.0148231	0.277	106.4	191.81	0.55	down	15q22	NR_002441	RefSeq // ENSEMBL // UCSC Genes	Homo sapiens small nucleolar RNA, C/D box 18A (SNORD18A), small nucleolar RNA. // ncrna:snoRNA chromosome:GRCh37:15:66795581:66795652:-1 gene:ENSG00000200623 gene_biotype:snoRNA transcript_biotype:snoRNA // ---	chr15	-	66795581	66795652	---	---	---	---	---	---	---	---	---	---	---	---	---	---	main		RPL4	SNAPC5 5435bp;
TC16000581.hg.1	SNORD111	small nucleolar RNA, C/D box 111	noncoding	0.0083714	0.234	60.11	109.64	0.55	down	16q22.1	NR_003079	RefSeq // ENSEMBL // UCSC Genes	Homo sapiens small nucleolar RNA, C/D box 111 (SNORD111), small nucleolar RNA. // ncrna:snoRNA chromosome:GRCh37:16:70571908:70572001:1 gene:ENSG00000221066 gene_biotype:snoRNA transcript_biotype:snoRNA // ---	chr16	+	70571908	70572001	---	---	---	---	---	---	---	---	---	---	---	---	---	---	main		SF3B3		MTSS1L
TC17000776.hg.1	SNORA76	small nucleolar RNA, H/ACA box 76	noncoding	0.0271673	0.327	115.21	209.97	0.55	down	17q23.3	NR_002995	RefSeq // ENSEMBL // UCSC Genes	Homo sapiens small nucleolar RNA, H/ACA box 76 (SNORA76), small nucleolar RNA. // ncrna:snoRNA chromosome:GRCh37:17:62223697:62223831:1 gene:ENSG00000221462 gene_biotype:snoRNA transcript_biotype:snoRNA // ---	chr17	+	62223697	62223831	---	---	---	---	---	---	---	---	---	---	---	---	---	---	main
TC17000796.hg.1	SNORA38B	small nucleolar RNA, H/ACA box 38B	noncoding	0.0251738	0.32	107.76	195.44	0.55	down	17q24.2	NR_003706	RefSeq // ENSEMBL // UCSC Genes	Homo sapiens small nucleolar RNA, H/ACA box 38B (SNORA38B), small nucleolar RNA. // ncrna:snoRNA chromosome:GRCh37:17:65736785:65736915:1 gene:ENSG00000200394 gene_biotype:snoRNA transcript_biotype:snoRNA // ---	chr17	+	65736785	65736917	---	---	---	---	---	---	---	---	---	---	---	---	---	---	main		NOL11
TC20000839.hg.1	SNORA71A	small nucleolar RNA, H/ACA box 71A	noncoding	0.0007821	0.121	1390.64	2534.18	0.55	down	20q11.23	NR_002911	RefSeq // ENSEMBL // ENSEMBL // UCSC Genes // Havana transcript	Homo sapiens small nucleolar RNA, H/ACA box 71A (SNORA71A), small nucleolar RNA. // ncrna:snoRNA chromosome:GRCh37:20:37055952:37056085:-1 gene:ENSG00000201599 gene_biotype:snoRNA transcript_biotype:snoRNA // cdna:known chromosome:GRCh37:20:37055949:37056086:-1 gene:ENSG00000225091 gene_biotype:processed_transcript transcript_biotype:processed_transcript // --- // cdna:all chromosome:VEGA50:20:37…	chr20	-	37055949	37056086	---	---	---	---	---	---	---	---	---	---	---	---	---	---	main
TC20001394.hg.1	---	accn=NULL class=lincRNA name=Human lincRNA ref=Scripture Reconstruction LincRNAs By Luo transcriptId=linc_luo_1391 cpcScore=-1.6343200 cnci=-0.1336716	noncoding	0.0037763	0.186	149.34	270.71	0.55	down	---	n345842	NONCODE	accn=NULL class=lincRNA name=Human lincRNA ref=Scripture Reconstruction LincRNAs By Luo transcriptId=linc_luo_1391 cpcScore=-1.6343200 cnci=-0.1336716	chr20	-	4004382	4005250	---	---	---	---	---	---	---	---	---	---	---	---	---	---	main			RNF24 8153bp;
TC08001671.hg.1	---	ncrna:snRNA chromosome:GRCh37:8:136754586:136754738:-1 gene:ENSG00000199652 gene_biotype:snRNA transcript_biotype:snRNA	noncoding	0.0060622	0.214	152.51	269.98	0.56	down	---	ENST00000362782	ENSEMBL // UCSC Genes	ncrna:snRNA chromosome:GRCh37:8:136754586:136754738:-1 gene:ENSG00000199652 gene_biotype:snRNA transcript_biotype:snRNA // ---	chr8	-	136754586	136754738	---	---	---	---	---	---	---	---	---	---	---	---	---	---	main
TC09001332.hg.1	SNORA84	small nucleolar RNA, H/ACA box 84	noncoding	0.0136996	0.272	109.7	195.04	0.56	down	9q22.31	NR_003704	RefSeq // RefSeq // ENSEMBL // UCSC Genes	Homo sapiens small nucleolar RNA, H/ACA box 84 (SNORA84), small nucleolar RNA. // Homo sapiens microRNA 3651 (MIR3651), microRNA. // ncrna:snoRNA chromosome:GRCh37:9:95054743:95054875:-1 gene:ENSG00000239183 gene_biotype:snoRNA transcript_biotype:snoRNA // ---	chr9	-	95054740	95054875	---	---	---	---	---	---	---	---	---	---	---	---	---	---	main	NOL8 4765bp;	IARS
TC0X001939.hg.1	---	accn=X87197 class=mRNAlike lncRNA name=NULL ref=H-invitational v7.5 transcriptId=HIT000324270 cpcScore=2.6960400 cnci=-0.0198409	noncoding	0.0133368	0.269	206.67	368.18	0.56	down	---	n336095	NONCODE	accn=X87197 class=mRNAlike lncRNA name=NULL ref=H-invitational v7.5 transcriptId=HIT000324270 cpcScore=2.6960400 cnci=-0.0198409	chrX	+	153698930	153699663	---	---	---	---	---	---	---	---	---	---	---	---	---	---	main		PLXNA3
TC10000128.hg.1	---	ncrna:misc_RNA chromosome:GRCh37:10:17445507:17445619:1 gene:ENSG00000251803 gene_biotype:misc_RNA transcript_biotype:misc_RNA	noncoding	0.0070166	0.224	52.52	94.03	0.56	down	---	ENST00000515994	ENSEMBL // UCSC Genes	ncrna:misc_RNA chromosome:GRCh37:10:17445507:17445619:1 gene:ENSG00000251803 gene_biotype:misc_RNA transcript_biotype:misc_RNA // ---	chr10	+	17445507	17445619	---	---	---	---	---	---	---	---	---	---	---	---	---	---	main				ST8SIA6
TC10000680.hg.1	---	ncrna:snRNA chromosome:GRCh37:10:97872504:97872608:1 gene:ENSG00000200728 gene_biotype:snRNA transcript_biotype:snRNA	noncoding	0.01339	0.269	47.52	85.51	0.56	down	---	ENST00000363858	ENSEMBL	ncrna:snRNA chromosome:GRCh37:10:97872504:97872608:1 gene:ENSG00000200728 gene_biotype:snRNA transcript_biotype:snRNA	chr10	+	97872504	97872608	---	---	---	---	---	---	---	---	---	---	---	---	---	---	main
TC11000910.hg.1	SCARNA9	small Cajal body-specific RNA 9	noncoding	0.0006492	0.116	215.81	385.22	0.56	down	11q21	NR_002569	RefSeq // ENSEMBL // ENSEMBL // ENSEMBL // UCSC Genes	Homo sapiens small Cajal body-specific RNA 9 (SCARNA9), guide RNA. // ncrna:snoRNA chromosome:GRCh37:11:93454963:93455032:1 gene:ENSG00000199675 gene_biotype:snoRNA transcript_biotype:snoRNA // ncrna:snoRNA chromosome:GRCh37:11:93454708:93454787:1 gene:ENSG00000201199 gene_biotype:snoRNA transcript_biotype:snoRNA // cdna:known chromosome:GRCh37:11:93454679:93455031:1 gene:ENSG00000254911 gene_bio…	chr11	+	93454679	93455032	---	---	---	---	---	---	---	---	---	---	---	---	---	---	main		KIAA1731
TC12001144.hg.1	SCARNA11	small Cajal body-specific RNA 11	noncoding	0.0299449	0.335	37.06	66.03	0.56	down	12p13.31	NR_003012	RefSeq // ENSEMBL // UCSC Genes	Homo sapiens small Cajal body-specific RNA 11 (SCARNA11), guide RNA. // ncrna:snoRNA chromosome:GRCh37:12:6690640:6690775:-1 gene:ENSG00000251898 gene_biotype:snoRNA transcript_biotype:snoRNA // ---	chr12	-	6690639	6690775	---	---	---	---	---	---	---	---	---	---	---	---	---	---	main		CHD4		LOC100127974
TC15000348.hg.1	---	ncrna:snRNA chromosome:GRCh37:15:45255028:45255131:1 gene:ENSG00000252475 gene_biotype:snRNA transcript_biotype:snRNA	noncoding	0.0249456	0.319	249.3	441.74	0.56	down	---	ENST00000516666	ENSEMBL	ncrna:snRNA chromosome:GRCh37:15:45255028:45255131:1 gene:ENSG00000252475 gene_biotype:snRNA transcript_biotype:snRNA	chr15	+	45255028	45255131	---	---	---	---	---	---	---	---	---	---	---	---	---	---	main		C15orf43
TC16000580.hg.1	SNORD111B	small nucleolar RNA, C/D box 111B	noncoding	0.0012704	0.136	5.29	9.44	0.56	down	16q22.1	NR_037420	RefSeq // ENSEMBL // UCSC Genes	Homo sapiens small nucleolar RNA, C/D box 111B (SNORD111B), small nucleolar RNA. // ncrna:snoRNA chromosome:GRCh37:16:70563412:70563491:1 gene:ENSG00000221514 gene_biotype:snoRNA transcript_biotype:snoRNA // ---	chr16	+	70563402	70563502	---	---	---	---	---	---	---	---	---	---	---	---	---	---	main		SF3B3		MTSS1L
TC19001207.hg.1	SNORD41	small nucleolar RNA, C/D box 41	noncoding	0.0013866	0.138	1463.8	2598.09	0.56	down	19p13.2	NR_002751	RefSeq // ENSEMBL // UCSC Genes	Homo sapiens small nucleolar RNA, C/D box 41 (SNORD41), small nuclear RNA. // ncrna:snoRNA chromosome:GRCh37:19:12817263:12817332:-1 gene:ENSG00000209702 gene_biotype:snoRNA transcript_biotype:snoRNA // ---	chr19	-	12817263	12817332	---	---	---	---	---	---	---	---	---	---	---	---	---	---	main		TNPO2	FBXW9 9806bp;
TC20000061.hg.1	---	ncrna:snRNA chromosome:GRCh37:20:5870701:5870858:1 gene:ENSG00000202380 gene_biotype:snRNA transcript_biotype:snRNA	noncoding	0.0142232	0.275	49.83	89.18	0.56	down	---	ENST00000365510	ENSEMBL	ncrna:snRNA chromosome:GRCh37:20:5870701:5870858:1 gene:ENSG00000202380 gene_biotype:snRNA transcript_biotype:snRNA	chr20	+	5870701	5870858	---	---	---	---	---	---	---	---	---	---	---	---	---	---	main
TC20000561.hg.1	SNORD119	small nucleolar RNA, C/D box 119	noncoding	5.81e-05	0.0728	35.57	63.21	0.56	down	20p13	NR_003684	RefSeq // ENSEMBL // UCSC Genes	Homo sapiens small nucleolar RNA, C/D box 119 (SNORD119), small nucleolar RNA. // ncrna:snoRNA chromosome:GRCh37:20:2443608:2443683:-1 gene:ENSG00000251806 gene_biotype:snoRNA transcript_biotype:snoRNA // ---	chr20	-	2443598	2443693	---	---	---	---	---	---	---	---	---	---	---	---	---	---	main		SNRPB
TC01002453.hg.1	---	ncrna:snRNA chromosome:GRCh37:1:31970419:31970525:-1 gene:ENSG00000206981 gene_biotype:snRNA transcript_biotype:snRNA	noncoding	0.0208118	0.304	430.38	751.09	0.57	down	---	ENST00000384254	ENSEMBL	ncrna:snRNA chromosome:GRCh37:1:31970419:31970525:-1 gene:ENSG00000206981 gene_biotype:snRNA transcript_biotype:snRNA	chr1	-	31970419	31970525	---	---	---	---	---	---	---	---	---	---	---	---	---	---	main
TC01004000.hg.1	RNU5E-2P	RNA, U5E small nuclear 2, pseudogene	noncoding	0.0323397	0.342	71.38	125.52	0.57	down	---	ENST00000516247	ENSEMBL	ncrna:snRNA chromosome:GRCh37:1:236026688:236026737:-1 gene:ENSG00000252056 gene_biotype:snRNA transcript_biotype:snRNA	chr1	-	236026688	236026737	---	---	---	---	---	---	---	---	---	---	---	---	---	---	main		LYST
TC01005268.hg.1	---	accn=DQ426869 class=mRNAlike lncRNA name=NULL ref=H-invitational v7.5 transcriptId=HIT000391912 cpcScore=1.3090600 cnci=-0.0403522	noncoding	0.0121743	0.262	162.38	284.94	0.57	down	---	n337334	NONCODE	accn=DQ426869 class=mRNAlike lncRNA name=NULL ref=H-invitational v7.5 transcriptId=HIT000391912 cpcScore=1.3090600 cnci=-0.0403522	chr1	-	12640653	12677348	---	---	---	---	---	---	---	---	---	---	---	---	---	---	main		DHRS3
TC02001442.hg.1	---	ncrna:snRNA chromosome:GRCh37:2:238471808:238471913:1 gene:ENSG00000222449 gene_biotype:snRNA transcript_biotype:snRNA	noncoding	0.0083351	0.234	24.65	43.5	0.57	down	---	ENST00000410517	ENSEMBL	ncrna:snRNA chromosome:GRCh37:2:238471808:238471913:1 gene:ENSG00000222449 gene_biotype:snRNA transcript_biotype:snRNA	chr2	+	238471808	238471913	---	---	---	---	---	---	---	---	---	---	---	---	---	---	main	MLPH 7847bp;		PRLH 3304bp;
TC02002862.hg.1	SNORD82	small nucleolar RNA, C/D box 82	noncoding	0.0168747	0.287	415.34	725.17	0.57	down	2q37.1	NR_004398	RefSeq // ENSEMBL // UCSC Genes	Homo sapiens small nucleolar RNA, C/D box 82 (SNORD82), small nuclear RNA. // ncrna:snoRNA chromosome:GRCh37:2:232325082:232325151:-1 gene:ENSG00000202400 gene_biotype:snoRNA transcript_biotype:snoRNA // ---	chr2	-	232325079	232325153	---	---	---	---	---	---	---	---	---	---	---	---	---	---	main		NCL
TC03000980.hg.1	---	ncrna:snoRNA chromosome:GRCh37:3:183169645:183169776:1 gene:ENSG00000201229 gene_biotype:snoRNA transcript_biotype:snoRNA	noncoding	0.0449806	0.372	40.32	70.75	0.57	down	---	ENST00000364359	ENSEMBL	ncrna:snoRNA chromosome:GRCh37:3:183169645:183169776:1 gene:ENSG00000201229 gene_biotype:snoRNA transcript_biotype:snoRNA	chr3	+	183169645	183169776	---	---	---	---	---	---	---	---	---	---	---	---	---	---	main
TC03001559.hg.1	---	ncrna:snRNA chromosome:GRCh37:3:73290940:73291047:-1 gene:ENSG00000252937 gene_biotype:snRNA transcript_biotype:snRNA	noncoding	0.0044465	0.196	18.7	32.54	0.57	down	---	ENST00000517128	ENSEMBL	ncrna:snRNA chromosome:GRCh37:3:73290940:73291047:-1 gene:ENSG00000252937 gene_biotype:snRNA transcript_biotype:snRNA	chr3	-	73290940	73291047	---	---	---	---	---	---	---	---	---	---	---	---	---	---	main
TC05000736.hg.1	VTRNA1-3	vault RNA 1-3	noncoding	0.0437363	0.369	55.09	96.58	0.57	down	5q31.3	NR_026705	RefSeq // ENSEMBL // UCSC Genes	Homo sapiens vault RNA 1-3 (VTRNA1-3), vault RNA. // ncrna:misc_RNA chromosome:GRCh37:5:140105743:140105831:1 gene:ENSG00000202515 gene_biotype:misc_RNA transcript_biotype:misc_RNA // ---	chr5	+	140105743	140105831	---	---	---	---	---	---	---	---	---	---	---	---	---	---	main
TC06001084.hg.1	---	ncrna:misc_RNA chromosome:GRCh37:6:149952573:149952685:1 gene:ENSG00000207292 gene_biotype:misc_RNA transcript_biotype:misc_RNA	noncoding	0.0013055	0.136	37.01	64.57	0.57	down	---	ENST00000384562	ENSEMBL	ncrna:misc_RNA chromosome:GRCh37:6:149952573:149952685:1 gene:ENSG00000207292 gene_biotype:misc_RNA transcript_biotype:misc_RNA	chr6	+	149952573	149952685	---	---	---	---	---	---	---	---	---	---	---	---	---	---	main				KATNA1
TC06002013.hg.1	---	ncrna:snRNA chromosome:GRCh37:6:111329473:111329579:-1 gene:ENSG00000207431 gene_biotype:snRNA transcript_biotype:snRNA	noncoding	0.0095149	0.243	33.61	59.42	0.57	down	---	ENST00000384700	ENSEMBL	ncrna:snRNA chromosome:GRCh37:6:111329473:111329579:-1 gene:ENSG00000207431 gene_biotype:snRNA transcript_biotype:snRNA	chr6	-	111329473	111329579	---	---	---	---	---	---	---	---	---	---	---	---	---	---	main				RPF2
TC06002498.hg.1	---	accn=CR598210 class=mRNAlike lncRNA name=Human lncRNA ref=JounralRNA transcriptId=3284 cpcScore=3.4355300 cnci=-0.1619434	noncoding	0.0015599	0.142	21.87	38.55	0.57	down	---	n340820	NONCODE	accn=CR598210 class=mRNAlike lncRNA name=Human lncRNA ref=JounralRNA transcriptId=3284 cpcScore=3.4355300 cnci=-0.1619434	chr6	+	3751345	3754080	---	---	---	---	---	---	---	---	---	---	---	---	---	---	main				PXDC1
TC06004072.hg.1	HCP5	HLA complex P5 (non-protein coding)	noncoding	0.0210754	0.304	41.77	72.85	0.57	down	6p21.3	NR_040662	RefSeq // UCSC Genes // UCSC Genes // GenBank // Havana transcript // Havana transcript	Homo sapiens HLA complex P5 (non-protein coding) (HCP5), non-coding RNA. // --- // --- // Homo sapiens HLA complex P5, mRNA (cDNA clone MGC:120402 IMAGE:40024782), complete cds. // cdna:all chromosome:VEGA50:6:31430962:31431598:1 Gene:OTTHUMG00000031282 // cdna:all chromosome:VEGA50:6:31430962:31445283:1 Gene:OTTHUMG00000031282	chr6	+	31430957	31445283	GO:0006952 // GO:0006952	defense response // defense response	traceable author statement // traceable author statement	---	---	---	---	---	---	---	---	---	---	---	main
TC07000645.hg.1	MIR4653	microRNA 4653	noncoding	0.0003401	0.104	79.47	138.57	0.57	down	---	NR_039797	RefSeq // UCSC Genes	Homo sapiens microRNA 4653 (MIR4653), microRNA. // ---	chr7	+	100802754	100802836	---	---	---	---	---	---	---	---	---	---	---	---	---	---	main		AP1S1
TC07000879.hg.1	---	ncrna:snRNA chromosome:GRCh37:7:139941670:139941832:1 gene:ENSG00000199283 gene_biotype:snRNA transcript_biotype:snRNA	noncoding	0.0016549	0.145	38.3	66.84	0.57	down	---	ENST00000362413	ENSEMBL	ncrna:snRNA chromosome:GRCh37:7:139941670:139941832:1 gene:ENSG00000199283 gene_biotype:snRNA transcript_biotype:snRNA	chr7	+	139941670	139941832	---	---	---	---	---	---	---	---	---	---	---	---	---	---	main
TC0X000808.hg.1	---	ncrna:snoRNA chromosome:GRCh37:X:3450158:3450292:-1 gene:ENSG00000212214 gene_biotype:snoRNA transcript_biotype:snoRNA	noncoding	0.0059954	0.214	114.7	201.23	0.57	down	---	ENST00000390912	ENSEMBL	ncrna:snoRNA chromosome:GRCh37:X:3450158:3450292:-1 gene:ENSG00000212214 gene_biotype:snoRNA transcript_biotype:snoRNA	chrX	-	3450158	3450292	---	---	---	---	---	---	---	---	---	---	---	---	---	---	main
TC0X001223.hg.1	---	ncrna:snRNA chromosome:GRCh37:X:100888994:100889100:-1 gene:ENSG00000207291 gene_biotype:snRNA transcript_biotype:snRNA	noncoding	0.0081853	0.234	330.68	585.08	0.57	down	---	ENST00000384561	ENSEMBL	ncrna:snRNA chromosome:GRCh37:X:100888994:100889100:-1 gene:ENSG00000207291 gene_biotype:snRNA transcript_biotype:snRNA	chrX	-	100888994	100889100	---	---	---	---	---	---	---	---	---	---	---	---	---	---	main
TC0X002157.hg.1	---	accn=NR_033670 class=lncRNA name= ref=RefGeneNoncode transcriptId=NR_033670 cpcScore=-0.9481000 cnci=-0.1474558 | accn=NR_033669 class=lncRNA name= ref=RefGeneNoncode transcriptId=NR_033669 cpcScore=-0.8366770 cnci=-0.1646652	noncoding	0.0397915	0.362	367.08	647.38	0.57	down	---	n409316	NONCODE // NONCODE	accn=NR_033670 class=lncRNA name= ref=RefGeneNoncode transcriptId=NR_033670 cpcScore=-0.9481000 cnci=-0.1474558 // accn=NR_033669 class=lncRNA name= ref=RefGeneNoncode transcriptId=NR_033669 cpcScore=-0.8366770 cnci=-0.1646652	chrX	-	100870108	100872991	---	---	---	---	---	---	---	---	---	---	---	---	---	---	main		ARMCX6
TC10000198.hg.1	---	ncrna:snRNA chromosome:GRCh37:10:28956848:28956954:1 gene:ENSG00000207483 gene_biotype:snRNA transcript_biotype:snRNA	noncoding	0.0233848	0.312	180.42	318.19	0.57	down	---	ENST00000384752	ENSEMBL	ncrna:snRNA chromosome:GRCh37:10:28956848:28956954:1 gene:ENSG00000207483 gene_biotype:snRNA transcript_biotype:snRNA	chr10	+	28956848	28956954	---	---	---	---	---	---	---	---	---	---	---	---	---	---	main			BAMBI 9317bp;
TC11001108.hg.1	---	ncrna:snRNA chromosome:GRCh37:11:121875063:121875159:1 gene:ENSG00000252556 gene_biotype:snRNA transcript_biotype:snRNA	noncoding	0.0268161	0.326	41.72	73.44	0.57	down	---	ENST00000516747	ENSEMBL	ncrna:snRNA chromosome:GRCh37:11:121875063:121875159:1 gene:ENSG00000252556 gene_biotype:snRNA transcript_biotype:snRNA	chr11	+	121875063	121875159	---	---	---	---	---	---	---	---	---	---	---	---	---	---	main
TC11002832.hg.1	---	accn=NULL class=lncRNA name= ref=UCSCGeneNoncode transcriptId=uc001pdv.2 cpcScore=-1.2863700 cnci=-0.4409098 | accn=BK005567 class=guide_RNA name=scaRNA mgU2-19/30 ref=GENEBANK transcriptId=NULL cpcScore=-1.2521100 cnci=-0.3750231	noncoding	0.0024328	0.164	253.26	448.23	0.57	down	---	n381754	NONCODE // NONCODE	accn=NULL class=lncRNA name= ref=UCSCGeneNoncode transcriptId=uc001pdv.2 cpcScore=-1.2863700 cnci=-0.4409098 // accn=BK005567 class=guide_RNA name=scaRNA mgU2-19/30 ref=GENEBANK transcriptId=NULL cpcScore=-1.2521100 cnci=-0.3750231	chr11	+	93454680	93455031	---	---	---	---	---	---	---	---	---	---	---	---	---	---	main		KIAA1731
TC12002533.hg.1	---	accn=NULL class=H_ACA_box_snoRNA name=H/ACA box small nucleolar RNA (snoRNA) ACA53 / SNO ref=fRNAdb v3.0 transcriptId=FR122257 cpcScore=-1.5906100 cnci=-0.3729903	noncoding	0.0065693	0.219	41.45	72.56	0.57	down	---	n199030	NONCODE	accn=NULL class=H_ACA_box_snoRNA name=H/ACA box small nucleolar RNA (snoRNA) ACA53 / SNO ref=fRNAdb v3.0 transcriptId=FR122257 cpcScore=-1.5906100 cnci=-0.3729903	chr12	+	98993413	98993662	---	---	---	---	---	---	---	---	---	---	---	---	---	---	main		SLC25A3
TC13000735.hg.1	RNY1P5	RNA, Ro-associated Y1 pseudogene 5	noncoding	0.0003467	0.105	13.89	24.29	0.57	down	---	ENST00000383890	ENSEMBL	ncrna:misc_RNA chromosome:GRCh37:13:74863237:74863351:-1 gene:ENSG00000206617 gene_biotype:misc_RNA transcript_biotype:misc_RNA	chr13	-	74863237	74863351	---	---	---	---	---	---	---	---	---	---	---	---	---	---	main
TC16000446.hg.1	---	ncrna:snoRNA chromosome:GRCh37:16:53368474:53368576:1 gene:ENSG00000238645 gene_biotype:snoRNA transcript_biotype:snoRNA	noncoding	0.0003728	0.107	286.55	499.4	0.57	down	---	ENST00000459097	ENSEMBL	ncrna:snoRNA chromosome:GRCh37:16:53368474:53368576:1 gene:ENSG00000238645 gene_biotype:snoRNA transcript_biotype:snoRNA	chr16	+	53368474	53368576	---	---	---	---	---	---	---	---	---	---	---	---	---	---	main	CHD9 7060bp;		RN5S427 2789bp;
TC17002216.hg.1	---	linc-ARL4D-2 chr17:+:41393290-41393906	noncoding	0.0187535	0.295	85.39	149.5	0.57	down	---	TCONS_00025394-XLOC_012209	Rinn lincRNAs	linc-ARL4D-2 chr17:+:41393290-41393906	chr17	+	41393291	41393906	---	---	---	---	---	---	---	---	---	---	---	---	---	---	main
TC20000840.hg.1	SNORA71C	small nucleolar RNA, H/ACA box 71C	noncoding	0.0011228	0.134	940.6	1639.37	0.57	down	20q11.23	NR_003017	RefSeq // ENSEMBL // UCSC Genes	Homo sapiens small nucleolar RNA, H/ACA box 71C (SNORA71C), small nucleolar RNA. // ncrna:snoRNA chromosome:GRCh37:20:37058313:37058446:-1 gene:ENSG00000201512 gene_biotype:snoRNA transcript_biotype:snoRNA // ---	chr20	-	37058310	37058447	---	---	---	---	---	---	---	---	---	---	---	---	---	---	main
TC20001312.hg.1	---	accn=AJ308020 class=mRNAlike lncRNA name=Human lncRNA ref=JounralRNA transcriptId=2170 cpcScore=-0.9541250 cnci=-0.2289433	noncoding	0.0031742	0.179	16.91	29.53	0.57	down	---	n339725	NONCODE	accn=AJ308020 class=mRNAlike lncRNA name=Human lncRNA ref=JounralRNA transcriptId=2170 cpcScore=-0.9541250 cnci=-0.2289433	chr20	+	56224091	56224500	---	---	---	---	---	---	---	---	---	---	---	---	---	---	main				PMEPA1
TC03000750.hg.1	---	ncrna:snRNA chromosome:GRCh37:3:139107119:139107206:1 gene:ENSG00000252245 gene_biotype:snRNA transcript_biotype:snRNA	noncoding	0.0215191	0.305	163.08	279.82	0.58	down	---	ENST00000516436	ENSEMBL	ncrna:snRNA chromosome:GRCh37:3:139107119:139107206:1 gene:ENSG00000252245 gene_biotype:snRNA transcript_biotype:snRNA	chr3	+	139107119	139107206	---	---	---	---	---	---	---	---	---	---	---	---	---	---	main			LOC100507291 1451bp;	COPB2
TC03001734.hg.1	---	ncrna:snRNA chromosome:GRCh37:3:125879126:125879288:-1 gene:ENSG00000201976 gene_biotype:snRNA transcript_biotype:snRNA	noncoding	0.0186619	0.294	229.29	392.3	0.58	down	---	ENST00000365106	ENSEMBL	ncrna:snRNA chromosome:GRCh37:3:125879126:125879288:-1 gene:ENSG00000201976 gene_biotype:snRNA transcript_biotype:snRNA	chr3	-	125879126	125879288	---	---	---	---	---	---	---	---	---	---	---	---	---	---	main		ALDH1L1
TC03002212.hg.1	---	accn=NR_037807 class=lncRNA name= ref=RefGeneNoncode transcriptId=NR_037807 cpcScore=17.2840000 cnci=-0.0612485	noncoding	0.010253	0.248	114.03	195.12	0.58	down	---	n410568	NONCODE	accn=NR_037807 class=lncRNA name= ref=RefGeneNoncode transcriptId=NR_037807 cpcScore=17.2840000 cnci=-0.0612485	chr3	+	9958758	9975305	---	---	---	---	---	---	---	---	---	---	---	---	---	---	main	IL17RE 672bp;	IL17RC	CRELD1 201bp;
TC04001837.hg.1	---	ncrna:snRNA chromosome:GRCh37:4:190630693:190630868:-1 gene:ENSG00000202215 gene_biotype:snRNA transcript_biotype:snRNA	noncoding	0.004817	0.201	26.23	44.85	0.58	down	---	ENST00000365345	ENSEMBL	ncrna:snRNA chromosome:GRCh37:4:190630693:190630868:-1 gene:ENSG00000202215 gene_biotype:snRNA transcript_biotype:snRNA	chr4	-	190630693	190630868	---	---	---	---	---	---	---	---	---	---	---	---	---	---	main
TC05000941.hg.1	---	ncrna:snoRNA chromosome:GRCh37:5:170793122:170793256:1 gene:ENSG00000206909 gene_biotype:snoRNA transcript_biotype:snoRNA	noncoding	0.0006818	0.118	16.95	29.21	0.58	down	---	ENST00000384182	ENSEMBL	ncrna:snoRNA chromosome:GRCh37:5:170793122:170793256:1 gene:ENSG00000206909 gene_biotype:snoRNA transcript_biotype:snoRNA	chr5	+	170793122	170793256	---	---	---	---	---	---	---	---	---	---	---	---	---	---	main
TC0X001936.hg.1	---	accn=NR_024048 class=lncRNA name= ref=RefGeneNoncode transcriptId=NR_024048 cpcScore=5.9558500 cnci=-0.1003267	noncoding	0.0011192	0.134	66.82	114.69	0.58	down	---	n406535	NONCODE	accn=NR_024048 class=lncRNA name= ref=RefGeneNoncode transcriptId=NR_024048 cpcScore=5.9558500 cnci=-0.1003267	chrX	+	153639877	153650063	---	---	---	---	---	---	---	---	---	---	---	---	---	---	main		TAZ	ATP6AP1 6915bp;	DNASE1L1
TC0X002077.hg.1	---	accn=NR_024449 class=lncRNA name= ref=RefGeneNoncode transcriptId=NR_024449 cpcScore=2.1642500 cnci=-0.1458017	noncoding	0.0070632	0.225	65.89	113.19	0.58	down	---	n406953	NONCODE	accn=NR_024449 class=lncRNA name= ref=RefGeneNoncode transcriptId=NR_024449 cpcScore=2.1642500 cnci=-0.1458017	chrX	-	53295506	53310796	---	---	---	---	---	---	---	---	---	---	---	---	---	---	main		IQSEC2
TC10002813.hg.1	---	accn=NR_024552 class=lncRNA name= ref=RefGeneNoncode transcriptId=NR_024552 cpcScore=5.3729600 cnci=-0.1078420	noncoding	0.0028971	0.171	235.43	407.25	0.58	down	---	n407058	NONCODE	accn=NR_024552 class=lncRNA name= ref=RefGeneNoncode transcriptId=NR_024552 cpcScore=5.3729600 cnci=-0.1078420	chr10	-	105206543	105212162	---	---	---	---	---	---	---	---	---	---	---	---	---	---	main	CALHM1 982bp;	CALHM2
TC12001154.hg.1	SCARNA12	small Cajal body-specific RNA 12	noncoding	0.0248798	0.319	603.1	1046.89	0.58	down	12p13.31	NR_003010	RefSeq // ENSEMBL // UCSC Genes	Homo sapiens small Cajal body-specific RNA 12 (SCARNA12), guide RNA. // ncrna:snoRNA chromosome:GRCh37:12:7076500:7076769:-1 gene:ENSG00000238795 gene_biotype:snoRNA transcript_biotype:snoRNA // ---	chr12	-	7076500	7076769	---	---	---	---	---	---	---	---	---	---	---	---	---	---	main	LPCAT3 8578bp;	PHB2
TC12001416.hg.1	---	ncrna:misc_RNA chromosome:GRCh37:12:45274651:45274752:-1 gene:ENSG00000201788 gene_biotype:misc_RNA transcript_biotype:misc_RNA	noncoding	0.0178918	0.291	17.54	30.24	0.58	down	---	ENST00000364918	ENSEMBL	ncrna:misc_RNA chromosome:GRCh37:12:45274651:45274752:-1 gene:ENSG00000201788 gene_biotype:misc_RNA transcript_biotype:misc_RNA	chr12	-	45274651	45274752	---	---	---	---	---	---	---	---	---	---	---	---	---	---	main		NELL2
TC12002522.hg.1	---	accn=NULL class=lncRNA name= ref=UCSCGeneNoncode transcriptId=uc001tdk.2 cpcScore=3.7194800 cnci=-0.2737446 | accn=AB041269 class=mRNAlike lncRNA name=Human lncRNA ref=JounralRNA transcriptId=5408 cpcScore=3.3915400 cnci=-0.1978243	noncoding	0.0206412	0.303	41.77	71.51	0.58	down	---	n381910	NONCODE // NONCODE	accn=NULL class=lncRNA name= ref=UCSCGeneNoncode transcriptId=uc001tdk.2 cpcScore=3.7194800 cnci=-0.2737446 // accn=AB041269 class=mRNAlike lncRNA name=Human lncRNA ref=JounralRNA transcriptId=5408 cpcScore=3.3915400 cnci=-0.1978243	chr12	+	95228174	95228804	---	---	---	---	---	---	---	---	---	---	---	---	---	---	main
TC12002730.hg.1	---	accn=AY077739 class=scaRNA name=U89 ref=NONCODE v2.0 transcriptId=NULL cpcScore=-1.5906100 cnci=-0.2243785	noncoding	0.0210819	0.304	665.1	1138.43	0.58	down	---	n3893	NONCODE	accn=AY077739 class=scaRNA name=U89 ref=NONCODE v2.0 transcriptId=NULL cpcScore=-1.5906100 cnci=-0.2243785	chr12	-	7076500	7076769	---	---	---	---	---	---	---	---	---	---	---	---	---	---	main	LPCAT3 8578bp;	PHB2
TC13000334.hg.1	---	ncrna:snoRNA chromosome:GRCh37:13:95862598:95862702:1 gene:ENSG00000238463 gene_biotype:snoRNA transcript_biotype:snoRNA	noncoding	0.001744	0.146	32.43	55.65	0.58	down	---	ENST00000459449	ENSEMBL	ncrna:snoRNA chromosome:GRCh37:13:95862598:95862702:1 gene:ENSG00000238463 gene_biotype:snoRNA transcript_biotype:snoRNA	chr13	+	95862598	95862702	---	---	---	---	---	---	---	---	---	---	---	---	---	---	main				ABCC4
TC14000265.hg.1	SNORD127	small nucleolar RNA, C/D box 127	noncoding	0.0014834	0.14	6.42	10.97	0.58	down	14q21.3	NR_003691	RefSeq // ENSEMBL // UCSC Genes	Homo sapiens small nucleolar RNA, C/D box 127 (SNORD127), small nucleolar RNA. // ncrna:snoRNA chromosome:GRCh37:14:45580086:45580171:1 gene:ENSG00000239043 gene_biotype:snoRNA transcript_biotype:snoRNA // ---	chr14	+	45580078	45580176	---	---	---	---	---	---	---	---	---	---	---	---	---	---	main		PRPF39
TC15000333.hg.1	---	ncrna:snRNA chromosome:GRCh37:15:43994561:43994668:1 gene:ENSG00000201136 gene_biotype:snRNA transcript_biotype:snRNA	noncoding	0.019829	0.3	24.89	42.69	0.58	down	---	ENST00000364266	ENSEMBL	ncrna:snRNA chromosome:GRCh37:15:43994561:43994668:1 gene:ENSG00000201136 gene_biotype:snRNA transcript_biotype:snRNA	chr15	+	43994561	43994668	---	---	---	---	---	---	---	---	---	---	---	---	---	---	main	CKMT1A 3141bp;
TC15001716.hg.1	---	ncrna:snRNA chromosome:GRCh37:15:80109691:80109792:-1 gene:ENSG00000252995 gene_biotype:snRNA transcript_biotype:snRNA	noncoding	0.0102128	0.248	18.2	31.48	0.58	down	---	ENST00000517186	ENSEMBL // UCSC Genes	ncrna:snRNA chromosome:GRCh37:15:80109691:80109792:-1 gene:ENSG00000252995 gene_biotype:snRNA transcript_biotype:snRNA // ---	chr15	-	80109691	80109792	---	---	---	---	---	---	---	---	---	---	---	---	---	---	main
TC17000101.hg.1	SNORA48	small nucleolar RNA, H/ACA box 48	noncoding	0.0052319	0.207	1839.05	3179.38	0.58	down	17p13.1	NR_002918	RefSeq // ENSEMBL // UCSC Genes	Homo sapiens small nucleolar RNA, H/ACA box 48 (SNORA48), small nucleolar RNA. // ncrna:snoRNA chromosome:GRCh37:17:7478031:7478165:1 gene:ENSG00000209582 gene_biotype:snoRNA transcript_biotype:snoRNA // ---	chr17	+	7478031	7478165	---	---	---	---	---	---	---	---	---	---	---	---	---	---	main	SENP3 2744bp;	EIF4A1	CD68 4640bp; MPDU1 8800bp;
TC19002544.hg.1	---	accn=CR626325 class=mRNAlike lncRNA name=NULL ref=H-invitational v7.5 transcriptId=HIT000305520 cpcScore=1.2804800 cnci=-0.1369859	noncoding	0.0118567	0.26	546.85	946.83	0.58	down	---	n335724	NONCODE	accn=CR626325 class=mRNAlike lncRNA name=NULL ref=H-invitational v7.5 transcriptId=HIT000305520 cpcScore=1.2804800 cnci=-0.1369859	chr19	-	50138550	50139936	---	---	---	---	---	---	---	---	---	---	---	---	---	---	main		RRAS
TC20000662.hg.1	---	ncrna:misc_RNA chromosome:GRCh37:20:18094111:18094223:-1 gene:ENSG00000207282 gene_biotype:misc_RNA transcript_biotype:misc_RNA	noncoding	0.008707	0.237	63.3	109.6	0.58	down	---	ENST00000384552	ENSEMBL	ncrna:misc_RNA chromosome:GRCh37:20:18094111:18094223:-1 gene:ENSG00000207282 gene_biotype:misc_RNA transcript_biotype:misc_RNA	chr20	-	18094111	18094223	---	---	---	---	---	---	---	---	---	---	---	---	---	---	main
TC21000398.hg.1	SNORA80	small nucleolar RNA, H/ACA box 80	noncoding	0.014406	0.276	139.56	242.41	0.58	down	21q22.11	NR_002996	RefSeq // ENSEMBL // UCSC Genes	Homo sapiens small nucleolar RNA, H/ACA box 80 (SNORA80), small nucleolar RNA. // ncrna:snoRNA chromosome:GRCh37:21:33749496:33749631:-1 gene:ENSG00000200792 gene_biotype:snoRNA transcript_biotype:snoRNA // ---	chr21	-	33749496	33749631	---	---	---	---	---	---	---	---	---	---	---	---	---	---	main		URB1
TC21000768.hg.1	---	accn=NR_024108 class=lncRNA name= ref=RefGeneNoncode transcriptId=NR_024108 cpcScore=10.9022000 cnci=-0.1302922	noncoding	0.0039792	0.189	415.38	714.4	0.58	down	---	n406590	NONCODE	accn=NR_024108 class=lncRNA name= ref=RefGeneNoncode transcriptId=NR_024108 cpcScore=10.9022000 cnci=-0.1302922	chr21	+	45719925	45747261	---	---	---	---	---	---	---	---	---	---	---	---	---	---	main	AIRE 1815bp;	PFKL
TC01001689.hg.1	SNORA77	small nucleolar RNA, H/ACA box 77	noncoding	0.01209	0.262	75.62	127.29	0.59	down	1q32.1	NR_003019	RefSeq // ENSEMBL // UCSC Genes	Homo sapiens small nucleolar RNA, H/ACA box 77 (SNORA77), small nucleolar RNA. // ncrna:snoRNA chromosome:GRCh37:1:203698709:203698833:1 gene:ENSG00000221643 gene_biotype:snoRNA transcript_biotype:snoRNA // ---	chr1	+	203698709	203698833	---	---	---	---	---	---	---	---	---	---	---	---	---	---	main		ATP2B4
TC01002536.hg.1	---	ncrna:snRNA chromosome:GRCh37:1:39586612:39586715:-1 gene:ENSG00000206654 gene_biotype:snRNA transcript_biotype:snRNA	noncoding	0.0321448	0.341	208.5	351.64	0.59	down	---	ENST00000383927	ENSEMBL	ncrna:snRNA chromosome:GRCh37:1:39586612:39586715:-1 gene:ENSG00000206654 gene_biotype:snRNA transcript_biotype:snRNA	chr1	-	39586612	39586715	---	---	---	---	---	---	---	---	---	---	---	---	---	---	main				MACF1
TC01003152.hg.1	---	ncrna:snRNA chromosome:GRCh37:1:148604908:148605072:-1 gene:ENSG00000207205 gene_biotype:snRNA transcript_biotype:snRNA	noncoding	0.0209561	0.304	406.9	689.16	0.59	down	---	ENST00000384476	ENSEMBL	ncrna:snRNA chromosome:GRCh37:1:148604908:148605072:-1 gene:ENSG00000207205 gene_biotype:snRNA transcript_biotype:snRNA	chr1	-	148604908	148605072	---	---	---	---	---	---	---	---	---	---	---	---	---	---	main
TC01003154.hg.1	---	ncrna:snRNA chromosome:GRCh37:1:148766938:148767102:-1 gene:ENSG00000206968 gene_biotype:snRNA transcript_biotype:snRNA	noncoding	0.0185012	0.293	356.74	603.23	0.59	down	---	ENST00000384241	ENSEMBL	ncrna:snRNA chromosome:GRCh37:1:148766938:148767102:-1 gene:ENSG00000206968 gene_biotype:snRNA transcript_biotype:snRNA	chr1	-	148766938	148767102	---	---	---	---	---	---	---	---	---	---	---	---	---	---	main
TC02002041.hg.1	---	ncrna:misc_RNA chromosome:GRCh37:2:85687267:85687375:-1 gene:ENSG00000199936 gene_biotype:misc_RNA transcript_biotype:misc_RNA	noncoding	0.0081981	0.234	10.48	17.64	0.59	down	---	ENST00000363066	ENSEMBL	ncrna:misc_RNA chromosome:GRCh37:2:85687267:85687375:-1 gene:ENSG00000199936 gene_biotype:misc_RNA transcript_biotype:misc_RNA	chr2	-	85687267	85687375	---	---	---	---	---	---	---	---	---	---	---	---	---	---	main
TC05000058.hg.1	---	ncrna:snRNA chromosome:GRCh37:5:7980259:7980417:1 gene:ENSG00000199773 gene_biotype:snRNA transcript_biotype:snRNA	noncoding	0.0148527	0.277	22.98	38.66	0.59	down	---	ENST00000362903	ENSEMBL	ncrna:snRNA chromosome:GRCh37:5:7980259:7980417:1 gene:ENSG00000199773 gene_biotype:snRNA transcript_biotype:snRNA	chr5	+	7980259	7980417	---	---	---	---	---	---	---	---	---	---	---	---	---	---	main
TC05001337.hg.1	---	ncrna:snRNA chromosome:GRCh37:5:50351187:50351293:-1 gene:ENSG00000207060 gene_biotype:snRNA transcript_biotype:snRNA	noncoding	0.0005435	0.111	36.44	62.15	0.59	down	---	ENST00000384332	ENSEMBL	ncrna:snRNA chromosome:GRCh37:5:50351187:50351293:-1 gene:ENSG00000207060 gene_biotype:snRNA transcript_biotype:snRNA	chr5	-	50351187	50351293	---	---	---	---	---	---	---	---	---	---	---	---	---	---	main
TC05002743.hg.1	---	linc-CPEB4-7 chr5:+:172722153-172724670	noncoding	0.0043538	0.194	203.79	343.93	0.59	down	---	TCONS_00010176-XLOC_004638	Rinn lincRNAs	linc-CPEB4-7 chr5:+:172722153-172724670	chr5	+	172722154	172724670	---	---	---	---	---	---	---	---	---	---	---	---	---	---	main
TC06000320.hg.1	SNORD32B	small nucleolar RNA, C/D box 32B	noncoding	0.0072045	0.226	98.02	166.21	0.59	down	6p22.1	NR_003049	RefSeq // ENSEMBL // UCSC Genes	Homo sapiens small nucleolar RNA, C/D box 32B (SNORD32B), small nucleolar RNA. // ncrna:snoRNA chromosome:GRCh37:6:29550026:29550109:1 gene:ENSG00000201330 gene_biotype:snoRNA transcript_biotype:snoRNA // ---	chr6	+	29550026	29550109	---	---	---	---	---	---	---	---	---	---	---	---	---	---	main			OR2H2 5123bp;
TC06000662.hg.1	---	ncrna:snRNA chromosome:GRCh37:6:53084059:53084222:1 gene:ENSG00000206908 gene_biotype:snRNA transcript_biotype:snRNA	noncoding	0.030013	0.335	180.91	306.8	0.59	down	---	ENST00000384181	ENSEMBL	ncrna:snRNA chromosome:GRCh37:6:53084059:53084222:1 gene:ENSG00000206908 gene_biotype:snRNA transcript_biotype:snRNA	chr6	+	53084059	53084222	---	---	---	---	---	---	---	---	---	---	---	---	---	---	main
TC06002710.hg.1	---	accn=NR_040662_4 class=lncRNA name= ref=RefGeneNoncode transcriptId=NR_040662_4 cpcScore=1.8174100 cnci=-0.1676834	noncoding	0.0023576	0.161	75.89	129.18	0.59	down	---	n411687	NONCODE	accn=NR_040662_4 class=lncRNA name= ref=RefGeneNoncode transcriptId=NR_040662_4 cpcScore=1.8174100 cnci=-0.1676834	chr6	+	31430957	31433586	---	---	---	---	---	---	---	---	---	---	---	---	---	---	main
TC07000867.hg.1	---	ncrna:misc_RNA chromosome:GRCh37:7:138100225:138100319:1 gene:ENSG00000202072 gene_biotype:misc_RNA transcript_biotype:misc_RNA	noncoding	0.0036669	0.185	12.64	21.6	0.59	down	---	ENST00000365202	ENSEMBL	ncrna:misc_RNA chromosome:GRCh37:7:138100225:138100319:1 gene:ENSG00000202072 gene_biotype:misc_RNA transcript_biotype:misc_RNA	chr7	+	138100225	138100319	---	---	---	---	---	---	---	---	---	---	---	---	---	---	main
TC07000891.hg.1	---	ncrna:snRNA chromosome:GRCh37:7:141427784:141427948:1 gene:ENSG00000212153 gene_biotype:snRNA transcript_biotype:snRNA	noncoding	0.0105636	0.251	543.01	919.95	0.59	down	---	ENST00000390851	ENSEMBL	ncrna:snRNA chromosome:GRCh37:7:141427784:141427948:1 gene:ENSG00000212153 gene_biotype:snRNA transcript_biotype:snRNA	chr7	+	141427784	141427948	---	---	---	---	---	---	---	---	---	---	---	---	---	---	main		WEE2
TC07001636.hg.1	---	ncrna:snRNA chromosome:GRCh37:7:98392341:98392447:-1 gene:ENSG00000207204 gene_biotype:snRNA transcript_biotype:snRNA	noncoding	0.0209949	0.304	62.64	106.97	0.59	down	---	ENST00000384475	ENSEMBL	ncrna:snRNA chromosome:GRCh37:7:98392341:98392447:-1 gene:ENSG00000207204 gene_biotype:snRNA transcript_biotype:snRNA	chr7	-	98392341	98392447	---	---	---	---	---	---	---	---	---	---	---	---	---	---	main
TC08000974.hg.1	---	ncrna:snRNA chromosome:GRCh37:8:11249920:11250026:-1 gene:ENSG00000199368 gene_biotype:snRNA transcript_biotype:snRNA	noncoding	0.0147028	0.277	128.72	219.87	0.59	down	---	ENST00000362498	ENSEMBL	ncrna:snRNA chromosome:GRCh37:8:11249920:11250026:-1 gene:ENSG00000199368 gene_biotype:snRNA transcript_biotype:snRNA	chr8	-	11249920	11250026	---	---	---	---	---	---	---	---	---	---	---	---	---	---	main				C8orf12
TC09000268.hg.1	---	ncrna:misc_RNA chromosome:GRCh37:9:46362605:46362716:1 gene:ENSG00000239090 gene_biotype:misc_RNA transcript_biotype:misc_RNA	noncoding	0.0097319	0.245	49.36	82.99	0.59	down	---	ENST00000459329	ENSEMBL // UCSC Genes	ncrna:misc_RNA chromosome:GRCh37:9:46362605:46362716:1 gene:ENSG00000239090 gene_biotype:misc_RNA transcript_biotype:misc_RNA // ---	chr9	+	46362605	46362716	---	---	---	---	---	---	---	---	---	---	---	---	---	---	main
TC09002344.hg.1	---	linc-KIAA0649-2 chr9:+:138307019-138307423	noncoding	0.0276382	0.328	26.42	44.8	0.59	down	---	TCONS_00016214-XLOC_007607	Rinn lincRNAs	linc-KIAA0649-2 chr9:+:138307019-138307423	chr9	+	138307020	138307423	---	---	---	---	---	---	---	---	---	---	---	---	---	---	main
TC0X001034.hg.1	---	ncrna:snRNA chromosome:GRCh37:X:49709947:49710053:-1 gene:ENSG00000201341 gene_biotype:snRNA transcript_biotype:snRNA	noncoding	0.0020088	0.153	14.09	23.89	0.59	down	---	ENST00000364471	ENSEMBL	ncrna:snRNA chromosome:GRCh37:X:49709947:49710053:-1 gene:ENSG00000201341 gene_biotype:snRNA transcript_biotype:snRNA	chrX	-	49709947	49710053	---	---	---	---	---	---	---	---	---	---	---	---	---	---	main				CLCN5
TC12000919.hg.1	---	ncrna:snRNA chromosome:GRCh37:12:117219910:117220013:1 gene:ENSG00000201382 gene_biotype:snRNA transcript_biotype:snRNA	noncoding	0.0372956	0.355	133.68	225.3	0.59	down	---	ENST00000364512	ENSEMBL	ncrna:snRNA chromosome:GRCh37:12:117219910:117220013:1 gene:ENSG00000201382 gene_biotype:snRNA transcript_biotype:snRNA	chr12	+	117219910	117220013	---	---	---	---	---	---	---	---	---	---	---	---	---	---	main		RNFT2
TC12001610.hg.1	SNORD59B	small nucleolar RNA, C/D box 59B	noncoding	0.010231	0.248	53.17	90.68	0.59	down	12q13.3	NR_003046	RefSeq // ENSEMBL // UCSC Genes	Homo sapiens small nucleolar RNA, C/D box 59B (SNORD59B), small nucleolar RNA. // ncrna:snoRNA chromosome:GRCh37:12:57037464:57037534:-1 gene:ENSG00000199649 gene_biotype:snoRNA transcript_biotype:snoRNA // ---	chr12	-	57037464	57037538	---	---	---	---	---	---	---	---	---	---	---	---	---	---	main		ATP5B	BAZ2A 7301bp;
TC15000453.hg.1	---	ncrna:snoRNA chromosome:GRCh37:15:59682407:59682516:1 gene:ENSG00000238767 gene_biotype:snoRNA transcript_biotype:snoRNA	noncoding	0.0044647	0.196	41.44	70	0.59	down	---	ENST00000458787	ENSEMBL	ncrna:snoRNA chromosome:GRCh37:15:59682407:59682516:1 gene:ENSG00000238767 gene_biotype:snoRNA transcript_biotype:snoRNA	chr15	+	59682407	59682516	---	---	---	---	---	---	---	---	---	---	---	---	---	---	main
TC16001498.hg.1	---	accn=CR608741 class=mRNAlike lncRNA name=NULL ref=H-invitational v7.5 transcriptId=HIT000287936 cpcScore=1.2517100 cnci=-0.0341077	noncoding	0.0063469	0.217	527.74	901.27	0.59	down	---	n335645	NONCODE	accn=CR608741 class=mRNAlike lncRNA name=NULL ref=H-invitational v7.5 transcriptId=HIT000287936 cpcScore=1.2517100 cnci=-0.0341077	chr16	+	31488264	31489279	---	---	---	---	---	---	---	---	---	---	---	---	---	---	main	ARMC5 9776bp;	TGFB1I1	SLC5A2 5160bp;
TC17000637.hg.1	---	ncrna:snRNA chromosome:GRCh37:17:47113714:47113817:1 gene:ENSG00000252636 gene_biotype:snRNA transcript_biotype:snRNA	noncoding	0.0147445	0.277	49.68	84.86	0.59	down	---	ENST00000516827	ENSEMBL	ncrna:snRNA chromosome:GRCh37:17:47113714:47113817:1 gene:ENSG00000252636 gene_biotype:snRNA transcript_biotype:snRNA	chr17	+	47113714	47113817	---	---	---	---	---	---	---	---	---	---	---	---	---	---	main		IGF2BP1
TC01003721.hg.1	---	ncrna:snRNA chromosome:GRCh37:1:203288124:203288227:-1 gene:ENSG00000202300 gene_biotype:snRNA transcript_biotype:snRNA	noncoding	0.0135417	0.27	91.17	150.99	0.6	down	---	ENST00000365430	ENSEMBL	ncrna:snRNA chromosome:GRCh37:1:203288124:203288227:-1 gene:ENSG00000202300 gene_biotype:snRNA transcript_biotype:snRNA	chr1	-	203288124	203288227	---	---	---	---	---	---	---	---	---	---	---	---	---	---	main
TC02001165.hg.1	---	ncrna:snRNA chromosome:GRCh37:2:201640307:201640473:1 gene:ENSG00000201737 gene_biotype:snRNA transcript_biotype:snRNA	noncoding	0.0032628	0.181	23.16	38.85	0.6	down	---	ENST00000364867	ENSEMBL	ncrna:snRNA chromosome:GRCh37:2:201640307:201640473:1 gene:ENSG00000201737 gene_biotype:snRNA transcript_biotype:snRNA	chr2	+	201640307	201640473	---	---	---	---	---	---	---	---	---	---	---	---	---	---	main
TC02002404.hg.1	---	ncrna:misc_RNA chromosome:GRCh37:2:148229701:148229811:-1 gene:ENSG00000207161 gene_biotype:misc_RNA transcript_biotype:misc_RNA	noncoding	0.0073552	0.228	19.37	32.51	0.6	down	---	ENST00000384432	ENSEMBL	ncrna:misc_RNA chromosome:GRCh37:2:148229701:148229811:-1 gene:ENSG00000207161 gene_biotype:misc_RNA transcript_biotype:misc_RNA	chr2	-	148229701	148229811	---	---	---	---	---	---	---	---	---	---	---	---	---	---	main
TC03000138.hg.1	---	ncrna:snRNA chromosome:GRCh37:3:27555362:27555523:1 gene:ENSG00000201033 gene_biotype:snRNA transcript_biotype:snRNA	noncoding	0.0452859	0.372	24.47	40.67	0.6	down	---	ENST00000364163	ENSEMBL	ncrna:snRNA chromosome:GRCh37:3:27555362:27555523:1 gene:ENSG00000201033 gene_biotype:snRNA transcript_biotype:snRNA	chr3	+	27555362	27555523	---	---	---	---	---	---	---	---	---	---	---	---	---	---	main
TC03001758.hg.1	---	ncrna:snoRNA chromosome:GRCh37:3:128433414:128433548:-1 gene:ENSG00000207130 gene_biotype:snoRNA transcript_biotype:snoRNA	noncoding	0.0003013	0.104	44.38	74.52	0.6	down	---	ENST00000384401	ENSEMBL	ncrna:snoRNA chromosome:GRCh37:3:128433414:128433548:-1 gene:ENSG00000207130 gene_biotype:snoRNA transcript_biotype:snoRNA	chr3	-	128433414	128433548	---	---	---	---	---	---	---	---	---	---	---	---	---	---	main
TC03001853.hg.1	---	ncrna:snRNA chromosome:GRCh37:3:142139047:142139211:-1 gene:ENSG00000202125 gene_biotype:snRNA transcript_biotype:snRNA	noncoding	0.0189143	0.295	66.81	110.56	0.6	down	---	ENST00000365255	ENSEMBL	ncrna:snRNA chromosome:GRCh37:3:142139047:142139211:-1 gene:ENSG00000202125 gene_biotype:snRNA transcript_biotype:snRNA	chr3	-	142139047	142139211	---	---	---	---	---	---	---	---	---	---	---	---	---	---	main		XRN1
TC05000073.hg.1	---	ncrna:misc_RNA chromosome:GRCh37:5:10337389:10337498:1 gene:ENSG00000252671 gene_biotype:misc_RNA transcript_biotype:misc_RNA	noncoding	0.0090649	0.239	33.02	55.39	0.6	down	---	ENST00000516862	ENSEMBL	ncrna:misc_RNA chromosome:GRCh37:5:10337389:10337498:1 gene:ENSG00000252671 gene_biotype:misc_RNA transcript_biotype:misc_RNA	chr5	+	10337389	10337498	---	---	---	---	---	---	---	---	---	---	---	---	---	---	main
TC05000182.hg.1	---	ncrna:snRNA chromosome:GRCh37:5:40269660:40269821:1 gene:ENSG00000199361 gene_biotype:snRNA transcript_biotype:snRNA	noncoding	0.0132801	0.268	60.49	100.98	0.6	down	---	ENST00000362491	ENSEMBL // UCSC Genes	ncrna:snRNA chromosome:GRCh37:5:40269660:40269821:1 gene:ENSG00000199361 gene_biotype:snRNA transcript_biotype:snRNA // ---	chr5	+	40269660	40269821	---	---	---	---	---	---	---	---	---	---	---	---	---	---	main
TC06002689.hg.1	---	accn=AF436089 class=mRNAlike lncRNA name=NULL ref=H-invitational v7.5 transcriptId=HIT000079647_04 cpcScore=5.4853700 cnci=-0.0270738	noncoding	0.017299	0.289	259.97	430.49	0.6	down	---	n333187	NONCODE	accn=AF436089 class=mRNAlike lncRNA name=NULL ref=H-invitational v7.5 transcriptId=HIT000079647_04 cpcScore=5.4853700 cnci=-0.0270738	chr6	+	29795825	29796595	---	---	---	---	---	---	---	---	---	---	---	---	---	---	main		HLA-G
TC06002796.hg.1	---	accn=NULL class=mRNAlike lncRNA name=vega lncRNA ref=GENCODE transcriptId=OTTHUMT00000040563 cpcScore=-0.2348700 cnci=-0.2187957	noncoding	0.0087146	0.237	40.45	67.95	0.6	down	---	n324514	NONCODE	accn=NULL class=mRNAlike lncRNA name=vega lncRNA ref=GENCODE transcriptId=OTTHUMT00000040563 cpcScore=-0.2348700 cnci=-0.2187957	chr6	+	43016080	43019686	---	---	---	---	---	---	---	---	---	---	---	---	---	---	main		KLC4		CUL7
TC08001143.hg.1	---	ncrna:snRNA chromosome:GRCh37:8:38023530:38023636:-1 gene:ENSG00000206610 gene_biotype:snRNA transcript_biotype:snRNA | havana:sense_intronic chromosome:GRCh37:8:38023530:38023636:-1 gene:ENSG00000253739 gene_biotype:sense_intronic transcript_biotype:sense_intronic	noncoding	0.0018428	0.148	79.26	131.22	0.6	down	---	ENST00000383883	ENSEMBL // ENSEMBL	ncrna:snRNA chromosome:GRCh37:8:38023530:38023636:-1 gene:ENSG00000206610 gene_biotype:snRNA transcript_biotype:snRNA // havana:sense_intronic chromosome:GRCh37:8:38023530:38023636:-1 gene:ENSG00000253739 gene_biotype:sense_intronic transcript_biotype:sense_intronic	chr8	-	38023530	38023636	---	---	---	---	---	---	---	---	---	---	---	---	---	---	main		LSM1
TC09001698.hg.1	RNU6ATAC	RNA, U6atac small nuclear (U12-dependent splicing)	noncoding	0.0399426	0.362	169.23	284.06	0.6	down	9q34.2	NR_023344	RefSeq // ENSEMBL // UCSC Genes	Homo sapiens RNA, U6atac small nuclear (U12-dependent splicing) (RNU6ATAC), small nuclear RNA. // ncrna:snRNA chromosome:GRCh37:9:137029561:137029686:-1 gene:ENSG00000221676 gene_biotype:snRNA transcript_biotype:snRNA // ---	chr9	-	137029561	137029686	---	---	---	---	---	---	---	---	---	---	---	---	---	---	main
TC0X000127.hg.1	HMGA1P1	high mobility group AT-hook 1 pseudogene 1	noncoding	0.0024737	0.165	863.47	1450.42	0.6	down	---	ENST00000374117	ENSEMBL	cdna:known chromosome:GRCh37:X:26766146:26766469:1 gene:ENSG00000236683 gene_biotype:pseudogene transcript_biotype:retrotransposed	chrX	+	26766146	26766469	---	---	---	---	---	---	---	---	---	---	---	---	---	---	main
TC11000720.hg.1	---	ncrna:snRNA chromosome:GRCh37:11:69921469:69921575:1 gene:ENSG00000202070 gene_biotype:snRNA transcript_biotype:snRNA	noncoding	0.0227128	0.309	139	232.35	0.6	down	---	ENST00000365200	ENSEMBL	ncrna:snRNA chromosome:GRCh37:11:69921469:69921575:1 gene:ENSG00000202070 gene_biotype:snRNA transcript_biotype:snRNA	chr11	+	69921469	69921575	---	---	---	---	---	---	---	---	---	---	---	---	---	---	main			ANO1 2833bp;
TC11002290.hg.1	---	ncrna:snRNA chromosome:GRCh37:11:111903223:111903322:-1 gene:ENSG00000238444 gene_biotype:snRNA transcript_biotype:snRNA	noncoding	0.0058471	0.212	14.7	24.5	0.6	down	---	ENST00000458841	ENSEMBL	ncrna:snRNA chromosome:GRCh37:11:111903223:111903322:-1 gene:ENSG00000238444 gene_biotype:snRNA transcript_biotype:snRNA	chr11	-	111903223	111903322	---	---	---	---	---	---	---	---	---	---	---	---	---	---	main				DLAT
TC14000537.hg.1	---	ncrna:snRNA chromosome:GRCh37:14:89286641:89286776:1 gene:ENSG00000200653 gene_biotype:snRNA transcript_biotype:snRNA	noncoding	0.0258253	0.323	11.63	19.25	0.6	down	---	ENST00000363783	ENSEMBL	ncrna:snRNA chromosome:GRCh37:14:89286641:89286776:1 gene:ENSG00000200653 gene_biotype:snRNA transcript_biotype:snRNA	chr14	+	89286641	89286776	---	---	---	---	---	---	---	---	---	---	---	---	---	---	main			TTC8 3721bp;
TC14000569.hg.1	---	ncrna:snRNA chromosome:GRCh37:14:92732046:92732151:1 gene:ENSG00000201097 gene_biotype:snRNA transcript_biotype:snRNA	noncoding	0.0039427	0.189	7.87	13.14	0.6	down	---	ENST00000364227	ENSEMBL	ncrna:snRNA chromosome:GRCh37:14:92732046:92732151:1 gene:ENSG00000201097 gene_biotype:snRNA transcript_biotype:snRNA	chr14	+	92732046	92732151	---	---	---	---	---	---	---	---	---	---	---	---	---	---	main
TC15000853.hg.1	---	ncrna:snRNA chromosome:GRCh37:15:90257463:90257569:1 gene:ENSG00000206590 gene_biotype:snRNA transcript_biotype:snRNA	noncoding	0.0087738	0.237	120.87	202.87	0.6	down	---	ENST00000383863	ENSEMBL	ncrna:snRNA chromosome:GRCh37:15:90257463:90257569:1 gene:ENSG00000206590 gene_biotype:snRNA transcript_biotype:snRNA	chr15	+	90257463	90257569	---	---	---	---	---	---	---	---	---	---	---	---	---	---	main		WDR93
TC16001041.hg.1	---	ncrna:snRNA chromosome:GRCh37:16:30712658:30712756:-1 gene:ENSG00000222287 gene_biotype:snRNA transcript_biotype:snRNA	noncoding	0.0242093	0.316	17.12	28.47	0.6	down	---	ENST00000410355	ENSEMBL	ncrna:snRNA chromosome:GRCh37:16:30712658:30712756:-1 gene:ENSG00000222287 gene_biotype:snRNA transcript_biotype:snRNA	chr16	-	30712658	30712756	---	---	---	---	---	---	---	---	---	---	---	---	---	---	main				SRCAP
TC16001238.hg.1	---	ncrna:snRNA chromosome:GRCh37:16:70479196:70479302:-1 gene:ENSG00000200153 gene_biotype:snRNA transcript_biotype:snRNA	noncoding	0.0350107	0.349	189.33	315.51	0.6	down	---	ENST00000363283	ENSEMBL	ncrna:snRNA chromosome:GRCh37:16:70479196:70479302:-1 gene:ENSG00000200153 gene_biotype:snRNA transcript_biotype:snRNA	chr16	-	70479196	70479302	---	---	---	---	---	---	---	---	---	---	---	---	---	---	main		MTSS1L	ST3GAL2 6205bp;
TC17001324.hg.1	RNY4P13	RNA, Ro-associated Y4 pseudogene 13	noncoding	0.0134553	0.27	33.52	55.63	0.6	down	---	ENST00000384284	ENSEMBL	ncrna:misc_RNA chromosome:GRCh37:17:28386070:28386165:-1 gene:ENSG00000207011 gene_biotype:misc_RNA transcript_biotype:misc_RNA	chr17	-	28386070	28386165	---	---	---	---	---	---	---	---	---	---	---	---	---	---	main				EFCAB5
TC17001549.hg.1	---	ncrna:snoRNA chromosome:GRCh37:17:41092592:41092719:-1 gene:ENSG00000212149 gene_biotype:snoRNA transcript_biotype:snoRNA	noncoding	0.0007861	0.121	8.23	13.83	0.6	down	---	ENST00000390847	ENSEMBL	ncrna:snoRNA chromosome:GRCh37:17:41092592:41092719:-1 gene:ENSG00000212149 gene_biotype:snoRNA transcript_biotype:snoRNA	chr17	-	41092592	41092719	---	---	---	---	---	---	---	---	---	---	---	---	---	---	main	AARSD1 9824bp;
TC17001655.hg.1	---	ncrna:snRNA chromosome:GRCh37:17:47026723:47026882:-1 gene:ENSG00000200903 gene_biotype:snRNA transcript_biotype:snRNA	noncoding	0.0198008	0.3	575.06	952.2	0.6	down	---	ENST00000364033	ENSEMBL	ncrna:snRNA chromosome:GRCh37:17:47026723:47026882:-1 gene:ENSG00000200903 gene_biotype:snRNA transcript_biotype:snRNA	chr17	-	47026723	47026882	---	---	---	---	---	---	---	---	---	---	---	---	---	---	main	GIP 9034bp;		SNF8 4244bp;
TC18000408.hg.1	---	ncrna:snRNA chromosome:GRCh37:18:19760073:19760179:-1 gene:ENSG00000201852 gene_biotype:snRNA transcript_biotype:snRNA	noncoding	0.0251605	0.32	109.49	183.68	0.6	down	---	ENST00000364982	ENSEMBL	ncrna:snRNA chromosome:GRCh37:18:19760073:19760179:-1 gene:ENSG00000201852 gene_biotype:snRNA transcript_biotype:snRNA	chr18	-	19760073	19760179	---	---	---	---	---	---	---	---	---	---	---	---	---	---	main				GATA6
TC19002485.hg.1	---	accn=AY820829 class=mRNAlike lncRNA name=NULL ref=H-invitational v7.5 transcriptId=HIT000257852 cpcScore=1.1846100 cnci=-1.0000000	noncoding	0.0017141	0.146	355.39	591.27	0.6	down	---	n335471	NONCODE	accn=AY820829 class=mRNAlike lncRNA name=NULL ref=H-invitational v7.5 transcriptId=HIT000257852 cpcScore=1.1846100 cnci=-1.0000000	chr19	-	41848071	41850788	---	---	---	---	---	---	---	---	---	---	---	---	---	---	main	B9D2 9534bp;	TGFB1
TC6_apd_hap1000013.hg.1	SNORD32B	small nucleolar RNA, C/D box 32B	noncoding	0.0078843	0.231	76.7	128.09	0.6	down	6p22.1	NR_003049	RefSeq // UCSC Genes	Homo sapiens small nucleolar RNA, C/D box 32B (SNORD32B), small nucleolar RNA. // ---	chr6_apd_hap1	+	853540	853616	---	---	---	---	---	---	---	---	---	---	---	---	---	---	main			OR2H2 5126bp;
TC6_cox_hap2000017.hg.1	SNORD32B	small nucleolar RNA, C/D box 32B	noncoding	0.0078843	0.231	76.7	128.09	0.6	down	6p22.1	NR_003049	RefSeq // UCSC Genes	Homo sapiens small nucleolar RNA, C/D box 32B (SNORD32B), small nucleolar RNA. // ---	chr6_cox_hap2	+	1068838	1068914	---	---	---	---	---	---	---	---	---	---	---	---	---	---	main			OR2H2 5127bp;
TC6_dbb_hap3000013.hg.1	SNORD32B	small nucleolar RNA, C/D box 32B	noncoding	0.0078843	0.231	76.7	128.09	0.6	down	6p22.1	NR_003049	RefSeq // UCSC Genes	Homo sapiens small nucleolar RNA, C/D box 32B (SNORD32B), small nucleolar RNA. // ---	chr6_dbb_hap3	+	853386	853462	---	---	---	---	---	---	---	---	---	---	---	---	---	---	main			OR2H2 5127bp;
TC6_mann_hap4000014.hg.1	SNORD32B	small nucleolar RNA, C/D box 32B	noncoding	0.0078843	0.231	76.7	128.09	0.6	down	6p22.1	NR_003049	RefSeq // UCSC Genes	Homo sapiens small nucleolar RNA, C/D box 32B (SNORD32B), small nucleolar RNA. // ---	chr6_mann_hap4	+	853056	853132	---	---	---	---	---	---	---	---	---	---	---	---	---	---	main			OR2H2 5127bp;
TC6_mcf_hap5000012.hg.1	SNORD32B	small nucleolar RNA, C/D box 32B	noncoding	0.0078843	0.231	76.7	128.09	0.6	down	6p22.1	NR_003049	RefSeq // UCSC Genes	Homo sapiens small nucleolar RNA, C/D box 32B (SNORD32B), small nucleolar RNA. // ---	chr6_mcf_hap5	+	853232	853308	---	---	---	---	---	---	---	---	---	---	---	---	---	---	main			OR2H2 5127bp;
TC6_qbl_hap6000012.hg.1	SNORD32B	small nucleolar RNA, C/D box 32B	noncoding	0.0078843	0.231	76.7	128.09	0.6	down	6p22.1	NR_003049	RefSeq // UCSC Genes	Homo sapiens small nucleolar RNA, C/D box 32B (SNORD32B), small nucleolar RNA. // ---	chr6_qbl_hap6	+	853360	853436	---	---	---	---	---	---	---	---	---	---	---	---	---	---	main			OR2H2 5127bp;
TC01000371.hg.1	SCARNA1	small Cajal body-specific RNA 1	noncoding	0.0042445	0.193	12.78	21.1	0.61	down	1p35.3	NR_002997	RefSeq // ENSEMBL // UCSC Genes	Homo sapiens small Cajal body-specific RNA 1 (SCARNA1), guide RNA. // ncrna:snoRNA chromosome:GRCh37:1:28160912:28161077:1 gene:ENSG00000252947 gene_biotype:snoRNA transcript_biotype:snoRNA // ---	chr1	+	28160912	28161077	---	---	---	---	---	---	---	---	---	---	---	---	---	---	main	STX12 9949bp;	PPP1R8
TC01001139.hg.1	---	ncrna:snRNA chromosome:GRCh37:1:147994146:147994313:1 gene:ENSG00000212456 gene_biotype:snRNA transcript_biotype:snRNA	noncoding	0.0061009	0.214	425.69	696.95	0.61	down	---	ENST00000391154	ENSEMBL	ncrna:snRNA chromosome:GRCh37:1:147994146:147994313:1 gene:ENSG00000212456 gene_biotype:snRNA transcript_biotype:snRNA	chr1	+	147994146	147994313	---	---	---	---	---	---	---	---	---	---	---	---	---	---	main		LOC100132999
TC01001142.hg.1	---	ncrna:snRNA chromosome:GRCh37:1:148241465:148241628:1 gene:ENSG00000207501 gene_biotype:snRNA transcript_biotype:snRNA	noncoding	0.0223236	0.308	384.05	631.17	0.61	down	---	ENST00000384770	ENSEMBL	ncrna:snRNA chromosome:GRCh37:1:148241465:148241628:1 gene:ENSG00000207501 gene_biotype:snRNA transcript_biotype:snRNA	chr1	+	148241465	148241628	---	---	---	---	---	---	---	---	---	---	---	---	---	---	main
TC02002047.hg.1	---	ncrna:snRNA chromosome:GRCh37:2:85955317:85955460:-1 gene:ENSG00000199687 gene_biotype:snRNA transcript_biotype:snRNA	noncoding	0.0148318	0.277	337.75	555.53	0.61	down	---	ENST00000362817	ENSEMBL // UCSC Genes	ncrna:snRNA chromosome:GRCh37:2:85955317:85955460:-1 gene:ENSG00000199687 gene_biotype:snRNA transcript_biotype:snRNA // ---	chr2	-	85955317	85955460	---	---	---	---	---	---	---	---	---	---	---	---	---	---	main
TC02002849.hg.1	---	ncrna:snRNA chromosome:GRCh37:2:230802530:230802598:-1 gene:ENSG00000252333 gene_biotype:snRNA transcript_biotype:snRNA	noncoding	0.0083516	0.234	23.27	38.46	0.61	down	---	ENST00000516524	ENSEMBL	ncrna:snRNA chromosome:GRCh37:2:230802530:230802598:-1 gene:ENSG00000252333 gene_biotype:snRNA transcript_biotype:snRNA	chr2	-	230802530	230802598	---	---	---	---	---	---	---	---	---	---	---	---	---	---	main				FBXO36
TC03000426.hg.1	---	ncrna:snRNA chromosome:GRCh37:3:72625842:72626005:1 gene:ENSG00000199469 gene_biotype:snRNA transcript_biotype:snRNA	noncoding	0.0232943	0.312	30.48	50.18	0.61	down	---	ENST00000362599	ENSEMBL	ncrna:snRNA chromosome:GRCh37:3:72625842:72626005:1 gene:ENSG00000199469 gene_biotype:snRNA transcript_biotype:snRNA	chr3	+	72625842	72626005	---	---	---	---	---	---	---	---	---	---	---	---	---	---	main
TC03001883.hg.1	---	ncrna:misc_RNA chromosome:GRCh37:3:148812140:148812249:-1 gene:ENSG00000201031 gene_biotype:misc_RNA transcript_biotype:misc_RNA	noncoding	0.0019969	0.153	22.69	37.07	0.61	down	---	ENST00000364161	ENSEMBL	ncrna:misc_RNA chromosome:GRCh37:3:148812140:148812249:-1 gene:ENSG00000201031 gene_biotype:misc_RNA transcript_biotype:misc_RNA	chr3	-	148812140	148812249	---	---	---	---	---	---	---	---	---	---	---	---	---	---	main			HLTF 7799bp;
TC06001304.hg.1	---	ncrna:snRNA chromosome:GRCh37:6:18307204:18307310:-1 gene:ENSG00000200681 gene_biotype:snRNA transcript_biotype:snRNA	noncoding	0.0096695	0.244	64.66	105.29	0.61	down	---	ENST00000363811	ENSEMBL	ncrna:snRNA chromosome:GRCh37:6:18307204:18307310:-1 gene:ENSG00000200681 gene_biotype:snRNA transcript_biotype:snRNA	chr6	-	18307204	18307310	---	---	---	---	---	---	---	---	---	---	---	---	---	---	main
TC0X001302.hg.1	---	ncrna:snRNA chromosome:GRCh37:X:115984807:115984913:-1 gene:ENSG00000206752 gene_biotype:snRNA transcript_biotype:snRNA	noncoding	0.0060105	0.214	120.15	198.47	0.61	down	---	ENST00000384025	ENSEMBL	ncrna:snRNA chromosome:GRCh37:X:115984807:115984913:-1 gene:ENSG00000206752 gene_biotype:snRNA transcript_biotype:snRNA	chrX	-	115984807	115984913	---	---	---	---	---	---	---	---	---	---	---	---	---	---	main
TC10000761.hg.1	---	ncrna:snRNA chromosome:GRCh37:10:104351281:104351387:1 gene:ENSG00000207029 gene_biotype:snRNA transcript_biotype:snRNA	noncoding	0.0177553	0.291	215.78	352.88	0.61	down	---	ENST00000384302	ENSEMBL	ncrna:snRNA chromosome:GRCh37:10:104351281:104351387:1 gene:ENSG00000207029 gene_biotype:snRNA transcript_biotype:snRNA	chr10	+	104351281	104351387	---	---	---	---	---	---	---	---	---	---	---	---	---	---	main		SUFU
TC12001702.hg.1	SNORA70G	small nucleolar RNA, H/ACA box 70G	noncoding	0.0021382	0.157	67.87	111.54	0.61	down	12q14	NR_033335	RefSeq // ENSEMBL // UCSC Genes	Homo sapiens small nucleolar RNA, H/ACA box 70G (SNORA70G), small nucleolar RNA. // ncrna:snoRNA chromosome:GRCh37:12:69021014:69021155:-1 gene:ENSG00000206650 gene_biotype:snoRNA transcript_biotype:snoRNA // ---	chr12	-	69021014	69021155	---	---	---	---	---	---	---	---	---	---	---	---	---	---	main				RAP1B
TC14000506.hg.1	---	ncrna:snRNA chromosome:GRCh37:14:84216728:84216845:1 gene:ENSG00000238561 gene_biotype:snRNA transcript_biotype:snRNA	noncoding	0.047375	0.376	19.51	31.82	0.61	down	---	ENST00000459249	ENSEMBL	ncrna:snRNA chromosome:GRCh37:14:84216728:84216845:1 gene:ENSG00000238561 gene_biotype:snRNA transcript_biotype:snRNA	chr14	+	84216728	84216845	---	---	---	---	---	---	---	---	---	---	---	---	---	---	main
TC17000700.hg.1	---	ncrna:snRNA chromosome:GRCh37:17:54948531:54948637:1 gene:ENSG00000212469 gene_biotype:snRNA transcript_biotype:snRNA	noncoding	0.0009198	0.126	42.64	69.4	0.61	down	---	ENST00000391167	ENSEMBL	ncrna:snRNA chromosome:GRCh37:17:54948531:54948637:1 gene:ENSG00000212469 gene_biotype:snRNA transcript_biotype:snRNA	chr17	+	54948531	54948637	---	---	---	---	---	---	---	---	---	---	---	---	---	---	main	DGKE 2495bp;
TC17001762.hg.1	SCARNA20	small Cajal body-specific RNA 20	noncoding	0.022853	0.309	72.14	119.13	0.61	down	17q23.2	NR_002999	RefSeq // ENSEMBL // UCSC Genes	Homo sapiens small Cajal body-specific RNA 20 (SCARNA20), guide RNA. // ncrna:snoRNA chromosome:GRCh37:17:58308877:58309007:-1 gene:ENSG00000252577 gene_biotype:snoRNA transcript_biotype:snoRNA // ---	chr17	-	58308877	58309007	---	---	---	---	---	---	---	---	---	---	---	---	---	---	main		USP32
TC19001757.hg.1	SNORD88C	small nucleolar RNA, C/D box 88C	noncoding	0.0242785	0.317	74.04	120.85	0.61	down	19q13.33	NR_003069	RefSeq // ENSEMBL // UCSC Genes	Homo sapiens small nucleolar RNA, C/D box 88C (SNORD88C), small nucleolar RNA. // ncrna:snoRNA chromosome:GRCh37:19:51305585:51305675:-1 gene:ENSG00000220988 gene_biotype:snoRNA transcript_biotype:snoRNA // ---	chr19	-	51305582	51305678	---	---	---	---	---	---	---	---	---	---	---	---	---	---	main		C19orf48
TC19001852.hg.1	---	ncrna:snRNA chromosome:GRCh37:19:55380394:55380500:-1 gene:ENSG00000199308 gene_biotype:snRNA transcript_biotype:snRNA	noncoding	0.0083452	0.234	791.69	1291.7	0.61	down	---	ENST00000362438	ENSEMBL	ncrna:snRNA chromosome:GRCh37:19:55380394:55380500:-1 gene:ENSG00000199308 gene_biotype:snRNA transcript_biotype:snRNA	chr19	-	55380394	55380500	---	---	---	---	---	---	---	---	---	---	---	---	---	---	main
TC20000106.hg.1	---	ncrna:snRNA chromosome:GRCh37:20:17168155:17168261:1 gene:ENSG00000251955 gene_biotype:snRNA transcript_biotype:snRNA	noncoding	0.0094334	0.243	210.58	347.14	0.61	down	---	ENST00000516146	ENSEMBL	ncrna:snRNA chromosome:GRCh37:20:17168155:17168261:1 gene:ENSG00000251955 gene_biotype:snRNA transcript_biotype:snRNA	chr20	+	17168155	17168261	---	---	---	---	---	---	---	---	---	---	---	---	---	---	main
TC20000261.hg.1	---	ncrna:snRNA chromosome:GRCh37:20:34475581:34475723:1 gene:ENSG00000201221 gene_biotype:snRNA transcript_biotype:snRNA	noncoding	0.0031892	0.179	21.07	34.81	0.61	down	---	ENST00000364351	ENSEMBL	ncrna:snRNA chromosome:GRCh37:20:34475581:34475723:1 gene:ENSG00000201221 gene_biotype:snRNA transcript_biotype:snRNA	chr20	+	34475581	34475723	---	---	---	---	---	---	---	---	---	---	---	---	---	---	main		PHF20
TC20001363.hg.1	---	accn=AJ844627 class=mRNAlike lncRNA name=NULL ref=H-invitational v7.5 transcriptId=HIT000249431 cpcScore=1.3433800 cnci=-0.2157790	noncoding	0.0100822	0.247	143.73	236.91	0.61	down	---	n335091	NONCODE	accn=AJ844627 class=mRNAlike lncRNA name=NULL ref=H-invitational v7.5 transcriptId=HIT000249431 cpcScore=1.3433800 cnci=-0.2157790	chr20	+	62701597	62701928	---	---	---	---	---	---	---	---	---	---	---	---	---	---	main		TCEA2	OPRL1 9543bp;
TC01001127.hg.1	---	ncrna:snRNA chromosome:GRCh37:1:147735751:147735907:1 gene:ENSG00000199879 gene_biotype:snRNA transcript_biotype:snRNA	noncoding	0.0273164	0.328	9.79	15.82	0.62	down	---	ENST00000363009	ENSEMBL	ncrna:snRNA chromosome:GRCh37:1:147735751:147735907:1 gene:ENSG00000199879 gene_biotype:snRNA transcript_biotype:snRNA	chr1	+	147735751	147735907	---	---	---	---	---	---	---	---	---	---	---	---	---	---	main
TC02000354.hg.1	---	ncrna:snRNA chromosome:GRCh37:2:61832751:61832857:1 gene:ENSG00000206973 gene_biotype:snRNA transcript_biotype:snRNA	noncoding	0.005673	0.211	167.46	271.9	0.62	down	---	ENST00000384246	ENSEMBL	ncrna:snRNA chromosome:GRCh37:2:61832751:61832857:1 gene:ENSG00000206973 gene_biotype:snRNA transcript_biotype:snRNA	chr2	+	61832751	61832857	---	---	---	---	---	---	---	---	---	---	---	---	---	---	main
TC02000521.hg.1	SNORD94	small nucleolar RNA, C/D box 94	noncoding	0.0251403	0.32	169.71	272.28	0.62	down	2p11.2	NR_004378	RefSeq // ENSEMBL // UCSC Genes	Homo sapiens small nucleolar RNA, C/D box 94 (SNORD94), small nucleolar RNA. // ncrna:snoRNA chromosome:GRCh37:2:86362993:86363129:1 gene:ENSG00000208772 gene_biotype:snoRNA transcript_biotype:snoRNA // ---	chr2	+	86362993	86363129	---	---	---	---	---	---	---	---	---	---	---	---	---	---	main		PTCD3
TC03002168.hg.1	---	ncrna:snRNA chromosome:GRCh37:3:196474063:196474195:-1 gene:ENSG00000202181 gene_biotype:snRNA transcript_biotype:snRNA	noncoding	0.0012093	0.135	13.55	21.74	0.62	down	---	ENST00000365311	ENSEMBL	ncrna:snRNA chromosome:GRCh37:3:196474063:196474195:-1 gene:ENSG00000202181 gene_biotype:snRNA transcript_biotype:snRNA	chr3	-	196474063	196474195	---	---	---	---	---	---	---	---	---	---	---	---	---	---	main				PAK2
TC03002425.hg.1	---	linc-EPHA6-1 chr3:+:96336028-96336495 | linc-EPHA6-1 chr3:+:96336044-96336983 | linc-EPHA6-1 chr3:+:96336526-96337039 | linc-EPHA6-1 chr3:+:96336527-96337036 | linc-EPHA6-1 chr3:+:96336528-96337035	noncoding	0.0041499	0.192	445.98	717.68	0.62	down	---	TCONS_00006915-XLOC_002730	Rinn lincRNAs // Rinn lincRNAs // Rinn lincRNAs // Rinn lincRNAs // Rinn lincRNAs	linc-EPHA6-1 chr3:+:96336028-96336495 // linc-EPHA6-1 chr3:+:96336044-96336983 // linc-EPHA6-1 chr3:+:96336526-96337039 // linc-EPHA6-1 chr3:+:96336527-96337036 // linc-EPHA6-1 chr3:+:96336528-96337035	chr3	+	96336029	96337039	---	---	---	---	---	---	---	---	---	---	---	---	---	---	main
TC05000526.hg.1	SNORA13	small nucleolar RNA, H/ACA box 13	noncoding	0.0154552	0.279	94.34	152.71	0.62	down	5q22.2	NR_002922	RefSeq // ENSEMBL // UCSC Genes	Homo sapiens small nucleolar RNA, H/ACA box 13 (SNORA13), small nucleolar RNA. // ncrna:snoRNA chromosome:GRCh37:5:111497182:111497314:1 gene:ENSG00000238363 gene_biotype:snoRNA transcript_biotype:snoRNA // ---	chr5	+	111497182	111497314	---	---	---	---	---	---	---	---	---	---	---	---	---	---	main				EPB41L4A
TC05001372.hg.1	RNU6ATAC2P	RNA, U6atac small nuclear 2, pseudogene	noncoding	0.0349634	0.349	99.21	159.01	0.62	down	---	ENST00000387943	ENSEMBL // UCSC Genes	ncrna:snRNA chromosome:GRCh37:5:55593391:55593516:-1 gene:ENSG00000210678 gene_biotype:snRNA transcript_biotype:snRNA // ---	chr5	-	55593391	55593516	---	---	---	---	---	---	---	---	---	---	---	---	---	---	main
TC05003305.hg.1	---	accn=M28590 class=mRNAlike lncRNA name=NULL ref=H-invitational v7.5 transcriptId=HIT000195249 cpcScore=0.5421470 cnci=-0.0392233	noncoding	0.032819	0.343	114.12	184.65	0.62	down	---	n334057	NONCODE	accn=M28590 class=mRNAlike lncRNA name=NULL ref=H-invitational v7.5 transcriptId=HIT000195249 cpcScore=0.5421470 cnci=-0.0392233	chr5	-	149782674	149782885	---	---	---	---	---	---	---	---	---	---	---	---	---	---	main		CD74
TC06001677.hg.1	---	ncrna:snRNA chromosome:GRCh37:6:36607322:36607449:-1 gene:ENSG00000238554 gene_biotype:snRNA transcript_biotype:snRNA	noncoding	0.0166272	0.285	879.74	1419.72	0.62	down	---	ENST00000459274	ENSEMBL	ncrna:snRNA chromosome:GRCh37:6:36607322:36607449:-1 gene:ENSG00000238554 gene_biotype:snRNA transcript_biotype:snRNA	chr6	-	36607322	36607449	---	---	---	---	---	---	---	---	---	---	---	---	---	---	main				PI16
TC09001294.hg.1	---	ncrna:snRNA chromosome:GRCh37:9:89037853:89038043:-1 gene:ENSG00000222293 gene_biotype:snRNA transcript_biotype:snRNA	noncoding	0.0113797	0.257	18.44	29.66	0.62	down	---	ENST00000410361	ENSEMBL	ncrna:snRNA chromosome:GRCh37:9:89037853:89038043:-1 gene:ENSG00000222293 gene_biotype:snRNA transcript_biotype:snRNA	chr9	-	89037853	89038043	---	---	---	---	---	---	---	---	---	---	---	---	---	---	main
TC0X000359.hg.1	---	ncrna:misc_RNA chromosome:GRCh37:X:67580917:67581029:1 gene:ENSG00000206646 gene_biotype:misc_RNA transcript_biotype:misc_RNA	noncoding	0.0009108	0.126	31.53	50.63	0.62	down	---	ENST00000383919	ENSEMBL	ncrna:misc_RNA chromosome:GRCh37:X:67580917:67581029:1 gene:ENSG00000206646 gene_biotype:misc_RNA transcript_biotype:misc_RNA	chrX	+	67580917	67581029	---	---	---	---	---	---	---	---	---	---	---	---	---	---	main				OPHN1
TC0X001145.hg.1	---	ncrna:snRNA chromosome:GRCh37:X:71960530:71960693:-1 gene:ENSG00000201271 gene_biotype:snRNA transcript_biotype:snRNA	noncoding	0.0248903	0.319	24.26	39.3	0.62	down	---	ENST00000364401	ENSEMBL	ncrna:snRNA chromosome:GRCh37:X:71960530:71960693:-1 gene:ENSG00000201271 gene_biotype:snRNA transcript_biotype:snRNA	chrX	-	71960530	71960693	---	---	---	---	---	---	---	---	---	---	---	---	---	---	main
TC0X001375.hg.1	---	ncrna:snRNA chromosome:GRCh37:X:132372685:132372844:-1 gene:ENSG00000202199 gene_biotype:snRNA transcript_biotype:snRNA	noncoding	0.0323643	0.342	36.29	58.64	0.62	down	---	ENST00000365329	ENSEMBL	ncrna:snRNA chromosome:GRCh37:X:132372685:132372844:-1 gene:ENSG00000202199 gene_biotype:snRNA transcript_biotype:snRNA	chrX	-	132372685	132372844	---	---	---	---	---	---	---	---	---	---	---	---	---	---	main
TC0X001828.hg.1	---	accn=NULL class=lncRNA name= ref=UCSCGeneNoncode transcriptId=uc004eon.1 cpcScore=5.9213900 cnci=-0.2098643	noncoding	0.0211266	0.304	109.12	176.18	0.62	down	---	n385807	NONCODE	accn=NULL class=lncRNA name= ref=UCSCGeneNoncode transcriptId=uc004eon.1 cpcScore=5.9213900 cnci=-0.2098643	chrX	+	109418975	109421014	---	---	---	---	---	---	---	---	---	---	---	---	---	---	main		TMEM164
TC13000630.hg.1	---	ncrna:snoRNA chromosome:GRCh37:13:45910449:45910582:-1 gene:ENSG00000253051 gene_biotype:snoRNA transcript_biotype:snoRNA	noncoding	0.0102825	0.248	845.74	1357.82	0.62	down	---	ENST00000517242	ENSEMBL	ncrna:snoRNA chromosome:GRCh37:13:45910449:45910582:-1 gene:ENSG00000253051 gene_biotype:snoRNA transcript_biotype:snoRNA	chr13	-	45910449	45910582	---	---	---	---	---	---	---	---	---	---	---	---	---	---	main	SNORA31 1033bp; TPT1 426bp;
TC16000208.hg.1	---	ncrna:snRNA chromosome:GRCh37:16:19023479:19023585:1 gene:ENSG00000207167 gene_biotype:snRNA transcript_biotype:snRNA	noncoding	0.0173749	0.289	29.81	48.24	0.62	down	---	ENST00000384438	ENSEMBL	ncrna:snRNA chromosome:GRCh37:16:19023479:19023585:1 gene:ENSG00000207167 gene_biotype:snRNA transcript_biotype:snRNA	chr16	+	19023479	19023585	---	---	---	---	---	---	---	---	---	---	---	---	---	---	main		TMC7
TC17000602.hg.1	RNU6ATAC3P	RNA, U6atac small nuclear 3, pseudogene	noncoding	0.0432778	0.369	12.43	20.14	0.62	down	---	ENST00000387974	ENSEMBL	ncrna:snRNA chromosome:GRCh37:17:44998490:44998615:1 gene:ENSG00000210709 gene_biotype:snRNA transcript_biotype:snRNA	chr17	+	44998490	44998615	---	---	---	---	---	---	---	---	---	---	---	---	---	---	main			GOSR2 1871bp;
TC17001739.hg.1	---	ncrna:snRNA chromosome:GRCh37:17:56736510:56736666:-1 gene:ENSG00000202077 gene_biotype:snRNA transcript_biotype:snRNA	noncoding	0.0272853	0.328	123.14	199.93	0.62	down	---	ENST00000365207	ENSEMBL	ncrna:snRNA chromosome:GRCh37:17:56736510:56736666:-1 gene:ENSG00000202077 gene_biotype:snRNA transcript_biotype:snRNA	chr17	-	56736510	56736666	---	---	---	---	---	---	---	---	---	---	---	---	---	---	main		TEX14
TC19000183.hg.1	---	ncrna:miRNA chromosome:GRCh37:19:10778447:10778519:1 gene:ENSG00000252007 gene_biotype:miRNA transcript_biotype:miRNA	noncoding	0.027631	0.328	306.26	492.31	0.62	down	---	ENST00000516198	ENSEMBL	ncrna:miRNA chromosome:GRCh37:19:10778447:10778519:1 gene:ENSG00000252007 gene_biotype:miRNA transcript_biotype:miRNA	chr19	+	10778447	10778519	---	---	---	---	---	---	---	---	---	---	---	---	---	---	main		ILF3
TC20001718.hg.1	---	accn=BC035147 class=mRNAlike lncRNA name=Human lncRNA ref=JounralRNA transcriptId=2205 cpcScore=2.2101300 cnci=-0.1877609	noncoding	0.0006803	0.118	158.99	255.73	0.62	down	---	n339758	NONCODE	accn=BC035147 class=mRNAlike lncRNA name=Human lncRNA ref=JounralRNA transcriptId=2205 cpcScore=2.2101300 cnci=-0.1877609	chr20	-	62492568	62495646	---	---	---	---	---	---	---	---	---	---	---	---	---	---	main				ABHD16B
TC02001059.hg.1	---	ncrna:snRNA chromosome:GRCh37:2:177529404:177529494:1 gene:ENSG00000252027 gene_biotype:snRNA transcript_biotype:snRNA	noncoding	0.0435378	0.369	13.3	21.02	0.63	down	---	ENST00000516218	ENSEMBL // UCSC Genes	ncrna:snRNA chromosome:GRCh37:2:177529404:177529494:1 gene:ENSG00000252027 gene_biotype:snRNA transcript_biotype:snRNA // ---	chr2	+	177529404	177529494	---	---	---	---	---	---	---	---	---	---	---	---	---	---	main
TC02001951.hg.1	SNORA36C	small nucleolar RNA, H/ACA box 36C	noncoding	0.0150237	0.278	51.72	82.37	0.63	down	2p14	NR_003705	RefSeq // ENSEMBL // UCSC Genes	Homo sapiens small nucleolar RNA, H/ACA box 36C (SNORA36C), small nucleolar RNA. // ncrna:snoRNA chromosome:GRCh37:2:69747175:69747306:-1 gene:ENSG00000207016 gene_biotype:snoRNA transcript_biotype:snoRNA // ---	chr2	-	69747175	69747306	---	---	---	---	---	---	---	---	---	---	---	---	---	---	main		AAK1
TC02003592.hg.1	---	accn=NULL class=lincRNA name=Human lincRNA ref=Scripture Reconstruction LincRNAs By Luo transcriptId=linc_luo_1519 cpcScore=-1.3851500 cnci=-0.2633697	noncoding	0.0436599	0.369	32.81	52.11	0.63	down	---	n345970	NONCODE	accn=NULL class=lincRNA name=Human lincRNA ref=Scripture Reconstruction LincRNAs By Luo transcriptId=linc_luo_1519 cpcScore=-1.3851500 cnci=-0.2633697	chr2	+	133036673	133039086	---	---	---	---	---	---	---	---	---	---	---	---	---	---	main
TC04000276.hg.1	---	ncrna:miRNA chromosome:GRCh37:4:47978233:47978344:1 gene:ENSG00000221764 gene_biotype:miRNA transcript_biotype:miRNA	noncoding	0.015468	0.279	3.54	5.61	0.63	down	---	ENST00000408837	ENSEMBL	ncrna:miRNA chromosome:GRCh37:4:47978233:47978344:1 gene:ENSG00000221764 gene_biotype:miRNA transcript_biotype:miRNA	chr4	+	47978233	47978344	---	---	---	---	---	---	---	---	---	---	---	---	---	---	main		NIPAL1		CNGA1
TC05000142.hg.1	---	ncrna:snRNA chromosome:GRCh37:5:32309768:32309874:1 gene:ENSG00000207052 gene_biotype:snRNA transcript_biotype:snRNA	noncoding	0.0069355	0.223	22.94	36.18	0.63	down	---	ENST00000384324	ENSEMBL	ncrna:snRNA chromosome:GRCh37:5:32309768:32309874:1 gene:ENSG00000207052 gene_biotype:snRNA transcript_biotype:snRNA	chr5	+	32309768	32309874	---	---	---	---	---	---	---	---	---	---	---	---	---	---	main				MTMR12
TC08000076.hg.1	---	ncrna:snRNA chromosome:GRCh37:8:10333733:10333839:1 gene:ENSG00000207128 gene_biotype:snRNA transcript_biotype:snRNA	noncoding	0.0307442	0.338	49.28	78.63	0.63	down	---	ENST00000384399	ENSEMBL	ncrna:snRNA chromosome:GRCh37:8:10333733:10333839:1 gene:ENSG00000207128 gene_biotype:snRNA transcript_biotype:snRNA	chr8	+	10333733	10333839	---	---	---	---	---	---	---	---	---	---	---	---	---	---	main
TC08000373.hg.1	---	ncrna:snRNA chromosome:GRCh37:8:54827279:54827384:1 gene:ENSG00000200528 gene_biotype:snRNA transcript_biotype:snRNA	noncoding	0.0174205	0.289	101.66	162.48	0.63	down	---	ENST00000363658	ENSEMBL	ncrna:snRNA chromosome:GRCh37:8:54827279:54827384:1 gene:ENSG00000200528 gene_biotype:snRNA transcript_biotype:snRNA	chr8	+	54827279	54827384	---	---	---	---	---	---	---	---	---	---	---	---	---	---	main		RGS20
TC09001479.hg.1	RNY4P18	RNA, Ro-associated Y4 pseudogene 18	noncoding	0.0002458	0.0973	28.12	44.57	0.63	down	---	ENST00000391107	ENSEMBL	ncrna:misc_RNA chromosome:GRCh37:9:113859605:113859693:-1 gene:ENSG00000212409 gene_biotype:misc_RNA transcript_biotype:misc_RNA	chr9	-	113859605	113859693	---	---	---	---	---	---	---	---	---	---	---	---	---	---	main
TC0X000315.hg.1	---	ncrna:misc_RNA chromosome:GRCh37:X:53353767:53353879:1 gene:ENSG00000207408 gene_biotype:misc_RNA transcript_biotype:misc_RNA	noncoding	0.0003617	0.106	17.32	27.52	0.63	down	---	ENST00000384677	ENSEMBL	ncrna:misc_RNA chromosome:GRCh37:X:53353767:53353879:1 gene:ENSG00000207408 gene_biotype:misc_RNA transcript_biotype:misc_RNA	chrX	+	53353767	53353879	---	---	---	---	---	---	---	---	---	---	---	---	---	---	main
TC0X001003.hg.1	---	ncrna:snRNA chromosome:GRCh37:X:48013408:48013502:-1 gene:ENSG00000201517 gene_biotype:snRNA transcript_biotype:snRNA	noncoding	0.0290939	0.334	154.73	244.86	0.63	down	---	ENST00000364647	ENSEMBL	ncrna:snRNA chromosome:GRCh37:X:48013408:48013502:-1 gene:ENSG00000201517 gene_biotype:snRNA transcript_biotype:snRNA	chrX	-	48013408	48013502	---	---	---	---	---	---	---	---	---	---	---	---	---	---	main
TC0X001119.hg.1	---	ncrna:snRNA chromosome:GRCh37:X:70240125:70240288:-1 gene:ENSG00000212605 gene_biotype:snRNA transcript_biotype:snRNA	noncoding	0.0069416	0.223	111.08	176.48	0.63	down	---	ENST00000391303	ENSEMBL	ncrna:snRNA chromosome:GRCh37:X:70240125:70240288:-1 gene:ENSG00000212605 gene_biotype:snRNA transcript_biotype:snRNA	chrX	-	70240125	70240288	---	---	---	---	---	---	---	---	---	---	---	---	---	---	main		SNX12
TC0X001193.hg.1	---	ncrna:snRNA chromosome:GRCh37:X:89852234:89852339:-1 gene:ENSG00000207515 gene_biotype:snRNA transcript_biotype:snRNA	noncoding	0.0288901	0.333	7.29	11.64	0.63	down	---	ENST00000384784	ENSEMBL	ncrna:snRNA chromosome:GRCh37:X:89852234:89852339:-1 gene:ENSG00000207515 gene_biotype:snRNA transcript_biotype:snRNA	chrX	-	89852234	89852339	---	---	---	---	---	---	---	---	---	---	---	---	---	---	main
TC0X001910.hg.1	---	accn=NULL class=lncRNA name= ref=UCSCGeneNoncode transcriptId=uc004fdu.2 cpcScore=-1.1474300 cnci=-0.2525309	noncoding	0.0053464	0.208	62.68	99.85	0.63	down	---	n385839	NONCODE	accn=NULL class=lncRNA name= ref=UCSCGeneNoncode transcriptId=uc004fdu.2 cpcScore=-1.1474300 cnci=-0.2525309	chrX	+	148853853	148854483	---	---	---	---	---	---	---	---	---	---	---	---	---	---	main		MAGEA9	HSFX2 1243bp;
TC0X001940.hg.1	---	accn=DQ655958 class=mRNAlike lncRNA name=NULL ref=H-invitational v7.5 transcriptId=HIT000393071 cpcScore=-0.8301930 cnci=-0.0543029	noncoding	0.0274084	0.328	109.42	172.61	0.63	down	---	n337378	NONCODE	accn=DQ655958 class=mRNAlike lncRNA name=NULL ref=H-invitational v7.5 transcriptId=HIT000393071 cpcScore=-0.8301930 cnci=-0.0543029	chrX	+	153717055	153717142	---	---	---	---	---	---	---	---	---	---	---	---	---	---	main				SLC10A3
TC10000687.hg.1	---	ncrna:snRNA chromosome:GRCh37:10:98502924:98503030:1 gene:ENSG00000207287 gene_biotype:snRNA transcript_biotype:snRNA	noncoding	0.004245	0.193	25.07	39.77	0.63	down	---	ENST00000384557	ENSEMBL	ncrna:snRNA chromosome:GRCh37:10:98502924:98503030:1 gene:ENSG00000207287 gene_biotype:snRNA transcript_biotype:snRNA	chr10	+	98502924	98503030	---	---	---	---	---	---	---	---	---	---	---	---	---	---	main
TC11002318.hg.1	---	ncrna:snoRNA chromosome:GRCh37:11:115497800:115497903:-1 gene:ENSG00000239153 gene_biotype:snoRNA transcript_biotype:snoRNA	noncoding	0.0082915	0.234	35.49	56.68	0.63	down	---	ENST00000458951	ENSEMBL	ncrna:snoRNA chromosome:GRCh37:11:115497800:115497903:-1 gene:ENSG00000239153 gene_biotype:snoRNA transcript_biotype:snoRNA	chr11	-	115497800	115497903	---	---	---	---	---	---	---	---	---	---	---	---	---	---	main
TC11002450.hg.1	TCEB2P2	transcription elongation factor B (SIII), polypeptide 2 (18kDa, elongin B) pseudogene 2	noncoding	0.0024624	0.164	136.84	218.69	0.63	down	---	ENST00000535377	ENSEMBL	cdna:known chromosome:GRCh37:11:129902759:129903115:-1 gene:ENSG00000255262 gene_biotype:pseudogene transcript_biotype:retrotransposed	chr11	-	129902759	129903115	---	---	---	---	---	---	---	---	---	---	---	---	---	---	main
TC12000412.hg.1	---	ncrna:snRNA chromosome:GRCh37:12:52381441:52381547:1 gene:ENSG00000206992 gene_biotype:snRNA transcript_biotype:snRNA	noncoding	0.0196585	0.298	118.69	189.6	0.63	down	---	ENST00000384265	ENSEMBL	ncrna:snRNA chromosome:GRCh37:12:52381441:52381547:1 gene:ENSG00000206992 gene_biotype:snRNA transcript_biotype:snRNA	chr12	+	52381441	52381547	---	---	---	---	---	---	---	---	---	---	---	---	---	---	main		ACVR1B
TC12001315.hg.1	---	ncrna:snRNA chromosome:GRCh37:12:25557222:25557362:-1 gene:ENSG00000201439 gene_biotype:snRNA transcript_biotype:snRNA	noncoding	0.0150458	0.278	9.94	15.8	0.63	down	---	ENST00000364569	ENSEMBL	ncrna:snRNA chromosome:GRCh37:12:25557222:25557362:-1 gene:ENSG00000201439 gene_biotype:snRNA transcript_biotype:snRNA	chr12	-	25557222	25557362	---	---	---	---	---	---	---	---	---	---	---	---	---	---	main
TC12002396.hg.1	---	accn=X55077 class=mRNAlike lncRNA name=Human lncRNA ref=JounralRNA transcriptId=4413 cpcScore=5.6502500 cnci=-0.0145022	noncoding	0.0017497	0.146	145.17	229.3	0.63	down	---	n341932	NONCODE	accn=X55077 class=mRNAlike lncRNA name=Human lncRNA ref=JounralRNA transcriptId=4413 cpcScore=5.6502500 cnci=-0.0145022	chr12	+	57593141	57599461	---	---	---	---	---	---	---	---	---	---	---	---	---	---	main		LRP1
TC13000371.hg.1	RNY5P8	RNA, Ro-associated Y5 pseudogene 8	noncoding	0.0003253	0.104	38.55	61.38	0.63	down	---	ENST00000410369	ENSEMBL	ncrna:misc_RNA chromosome:GRCh37:13:103472343:103472419:1 gene:ENSG00000222301 gene_biotype:misc_RNA transcript_biotype:misc_RNA	chr13	+	103472343	103472419	---	---	---	---	---	---	---	---	---	---	---	---	---	---	main		BIVM
TC14000564.hg.1	SNORA11B	small nucleolar RNA, H/ACA box 11B	noncoding	0.022843	0.309	39.82	63.05	0.63	down	14q32.12	NR_003709	RefSeq // ENSEMBL // UCSC Genes	Homo sapiens small nucleolar RNA, H/ACA box 11B (SNORA11B), small nucleolar RNA. // ncrna:snoRNA chromosome:GRCh37:14:91592769:91592897:1 gene:ENSG00000221102 gene_biotype:snoRNA transcript_biotype:snoRNA // ---	chr14	+	91592769	91592897	---	---	---	---	---	---	---	---	---	---	---	---	---	---	main		C14orf159
TC14000882.hg.1	RPPH1	ribonuclease P RNA component H1	noncoding	0.0013129	0.136	221.51	349.73	0.63	down	14q11.2	NR_002312	RefSeq // ENSEMBL // ENSEMBL // UCSC Genes	Homo sapiens ribonuclease P RNA component H1 (RPPH1), RNase P RNA. // ncrna:misc_RNA chromosome:GRCh37:14:20811234:20811566:-1 gene:ENSG00000252678 gene_biotype:misc_RNA transcript_biotype:misc_RNA // cdna:known chromosome:GRCh37:14:20811207:20811844:-1 gene:ENSG00000259001 gene_biotype:antisense transcript_biotype:antisense // ---	chr14	-	20811207	20811844	---	---	---	---	---	---	---	---	---	---	---	---	---	---	main			CCNB1IP1 9750bp;	PARP2
TC14002183.hg.1	---	accn=AK094143 class=mRNAlike lncRNA name=Human lncRNA ref=JounralRNA transcriptId=939 cpcScore=7.3447200 cnci=-0.0493169	noncoding	0.0482121	0.378	230.24	367.23	0.63	down	---	n338537	NONCODE	accn=AK094143 class=mRNAlike lncRNA name=Human lncRNA ref=JounralRNA transcriptId=939 cpcScore=7.3447200 cnci=-0.0493169	chr14	-	105419893	105436820	---	---	---	---	---	---	---	---	---	---	---	---	---	---	main		AHNAK2
TC17000327.hg.1	SNORD42A	small nucleolar RNA, C/D box 42A	noncoding	0.0010164	0.129	13.89	21.89	0.63	down	17q11	NR_000014	RefSeq // ENSEMBL // UCSC Genes	Homo sapiens small nucleolar RNA, C/D box 42A (SNORD42A), small nuclear RNA. // ncrna:snoRNA chromosome:GRCh37:17:27050447:27050510:1 gene:ENSG00000238649 gene_biotype:snoRNA transcript_biotype:snoRNA // ---	chr17	+	27050447	27050510	---	---	---	---	---	---	---	---	---	---	---	---	---	---	main			NEK8 5288bp;
TC17002607.hg.1	---	accn=NULL class=lincRNA name=Human lincRNA ref=Scripture Reconstruction LincRNAs By Luo transcriptId=linc_luo_1398 cpcScore=-1.6705900 cnci=-0.1359676 | linc-GPR179 chr17:-:36606632-36608672 | linc-GPR179 chr17:-:36606670-36608643 | linc-GPR179 chr17:-:36606681-36608764 | linc-GPR179 chr17:-:36606947-36608579 | linc-GPR179 chr17:-:36607631-36608104 | linc-GPR179 chr17:-:36607673-36608673	noncoding	0.0089548	0.238	50.87	80.49	0.63	down	---	n345849	NONCODE // Rinn lincRNAs // Rinn lincRNAs // Rinn lincRNAs // Rinn lincRNAs // Rinn lincRNAs // Rinn lincRNAs	accn=NULL class=lincRNA name=Human lincRNA ref=Scripture Reconstruction LincRNAs By Luo transcriptId=linc_luo_1398 cpcScore=-1.6705900 cnci=-0.1359676 // linc-GPR179 chr17:-:36606632-36608672 // linc-GPR179 chr17:-:36606670-36608643 // linc-GPR179 chr17:-:36606681-36608764 // linc-GPR179 chr17:-:36606947-36608579 // linc-GPR179 chr17:-:36607631-36608104 // linc-GPR179 chr17:-:36607673-36608673	chr17	-	36606298	36609907	---	---	---	---	---	---	---	---	---	---	---	---	---	---	main				ARHGAP23
TC18000535.hg.1	---	ncrna:snRNA chromosome:GRCh37:18:54951833:54951939:-1 gene:ENSG00000202240 gene_biotype:snRNA transcript_biotype:snRNA	noncoding	0.027106	0.327	408.51	647.17	0.63	down	---	ENST00000365370	ENSEMBL	ncrna:snRNA chromosome:GRCh37:18:54951833:54951939:-1 gene:ENSG00000202240 gene_biotype:snRNA transcript_biotype:snRNA	chr18	-	54951833	54951939	---	---	---	---	---	---	---	---	---	---	---	---	---	---	main
TC19000198.hg.1	---	ncrna:misc_RNA chromosome:GRCh37:19:11519448:11519556:1 gene:ENSG00000202357 gene_biotype:misc_RNA transcript_biotype:misc_RNA	noncoding	0.0091248	0.239	58.16	92.29	0.63	down	---	ENST00000365487	ENSEMBL	ncrna:misc_RNA chromosome:GRCh37:19:11519448:11519556:1 gene:ENSG00000202357 gene_biotype:misc_RNA transcript_biotype:misc_RNA	chr19	+	11519448	11519556	---	---	---	---	---	---	---	---	---	---	---	---	---	---	main				RGL3
TC20000317.hg.1	---	ncrna:snRNA chromosome:GRCh37:20:42101653:42101759:1 gene:ENSG00000201372 gene_biotype:snRNA transcript_biotype:snRNA	noncoding	0.0145157	0.277	420.19	672.11	0.63	down	---	ENST00000364502	ENSEMBL	ncrna:snRNA chromosome:GRCh37:20:42101653:42101759:1 gene:ENSG00000201372 gene_biotype:snRNA transcript_biotype:snRNA	chr20	+	42101653	42101759	---	---	---	---	---	---	---	---	---	---	---	---	---	---	main	SRSF6 9408bp;
TC22000340.hg.1	---	ncrna:snRNA chromosome:GRCh37:22:42075715:42075821:1 gene:ENSG00000207457 gene_biotype:snRNA transcript_biotype:snRNA	noncoding	0.0373585	0.355	9.66	15.24	0.63	down	---	ENST00000384726	ENSEMBL	ncrna:snRNA chromosome:GRCh37:22:42075715:42075821:1 gene:ENSG00000207457 gene_biotype:snRNA transcript_biotype:snRNA	chr22	+	42075715	42075821	---	---	---	---	---	---	---	---	---	---	---	---	---	---	main	CSDC2 5717bp;		C22orf46 9122bp;	NHP2L1
TC01001564.hg.1	---	ncrna:snRNA chromosome:GRCh37:1:180727858:180727953:1 gene:ENSG00000206753 gene_biotype:snRNA transcript_biotype:snRNA	noncoding	0.025755	0.323	722.29	1122.87	0.64	down	---	ENST00000384026	ENSEMBL	ncrna:snRNA chromosome:GRCh37:1:180727858:180727953:1 gene:ENSG00000206753 gene_biotype:snRNA transcript_biotype:snRNA	chr1	+	180727858	180727953	---	---	---	---	---	---	---	---	---	---	---	---	---	---	main		XPR1
TC01001837.hg.1	---	ncrna:snRNA chromosome:GRCh37:1:223877753:223877816:1 gene:ENSG00000212398 gene_biotype:snRNA transcript_biotype:snRNA	noncoding	0.0184241	0.293	338.09	529.05	0.64	down	---	ENST00000391096	ENSEMBL	ncrna:snRNA chromosome:GRCh37:1:223877753:223877816:1 gene:ENSG00000212398 gene_biotype:snRNA transcript_biotype:snRNA	chr1	+	223877753	223877816	---	---	---	---	---	---	---	---	---	---	---	---	---	---	main
TC02000719.hg.1	---	ncrna:snRNA chromosome:GRCh37:2:113844382:113844488:1 gene:ENSG00000201805 gene_biotype:snRNA transcript_biotype:snRNA	noncoding	0.0082371	0.234	11.24	17.49	0.64	down	---	ENST00000364935	ENSEMBL	ncrna:snRNA chromosome:GRCh37:2:113844382:113844488:1 gene:ENSG00000201805 gene_biotype:snRNA transcript_biotype:snRNA	chr2	+	113844382	113844488	---	---	---	---	---	---	---	---	---	---	---	---	---	---	main
TC02001606.hg.1	---	ncrna:snoRNA chromosome:GRCh37:2:18221872:18221999:-1 gene:ENSG00000212455 gene_biotype:snoRNA transcript_biotype:snoRNA	noncoding	0.015106	0.278	8.12	12.65	0.64	down	---	ENST00000391153	ENSEMBL	ncrna:snoRNA chromosome:GRCh37:2:18221872:18221999:-1 gene:ENSG00000212455 gene_biotype:snoRNA transcript_biotype:snoRNA	chr2	-	18221872	18221999	---	---	---	---	---	---	---	---	---	---	---	---	---	---	main				KCNS3
TC02002409.hg.1	---	ncrna:snoRNA chromosome:GRCh37:2:149018143:149018277:-1 gene:ENSG00000212181 gene_biotype:snoRNA transcript_biotype:snoRNA	noncoding	0.0049131	0.203	44.43	69.62	0.64	down	---	ENST00000390879	ENSEMBL	ncrna:snoRNA chromosome:GRCh37:2:149018143:149018277:-1 gene:ENSG00000212181 gene_biotype:snoRNA transcript_biotype:snoRNA	chr2	-	149018143	149018277	---	---	---	---	---	---	---	---	---	---	---	---	---	---	main				MBD5
TC04001368.hg.1	---	ncrna:misc_RNA chromosome:GRCh37:4:88665104:88665205:-1 gene:ENSG00000200024 gene_biotype:misc_RNA transcript_biotype:misc_RNA	noncoding	0.0238057	0.314	44.57	69.22	0.64	down	---	ENST00000363154	ENSEMBL	ncrna:misc_RNA chromosome:GRCh37:4:88665104:88665205:-1 gene:ENSG00000200024 gene_biotype:misc_RNA transcript_biotype:misc_RNA	chr4	-	88665104	88665205	---	---	---	---	---	---	---	---	---	---	---	---	---	---	main
TC05000672.hg.1	---	ncrna:miRNA chromosome:GRCh37:5:134259743:134259812:1 gene:ENSG00000238828 gene_biotype:miRNA transcript_biotype:miRNA	noncoding	0.0012812	0.136	726.35	1133.49	0.64	down	---	ENST00000458878	ENSEMBL	ncrna:miRNA chromosome:GRCh37:5:134259743:134259812:1 gene:ENSG00000238828 gene_biotype:miRNA transcript_biotype:miRNA	chr5	+	134259743	134259812	---	---	---	---	---	---	---	---	---	---	---	---	---	---	main		PCBD2
TC05001225.hg.1	---	ncrna:snRNA chromosome:GRCh37:5:31595672:31595776:-1 gene:ENSG00000199765 gene_biotype:snRNA transcript_biotype:snRNA	noncoding	0.0309004	0.338	9.6	14.89	0.64	down	---	ENST00000362895	ENSEMBL	ncrna:snRNA chromosome:GRCh37:5:31595672:31595776:-1 gene:ENSG00000199765 gene_biotype:snRNA transcript_biotype:snRNA	chr5	-	31595672	31595776	---	---	---	---	---	---	---	---	---	---	---	---	---	---	main
TC05001929.hg.1	---	ncrna:misc_RNA chromosome:GRCh37:5:149319593:149319694:-1 gene:ENSG00000200334 gene_biotype:misc_RNA transcript_biotype:misc_RNA	noncoding	0.0017822	0.147	33.42	51.98	0.64	down	---	ENST00000363464	ENSEMBL	ncrna:misc_RNA chromosome:GRCh37:5:149319593:149319694:-1 gene:ENSG00000200334 gene_biotype:misc_RNA transcript_biotype:misc_RNA	chr5	-	149319593	149319694	---	---	---	---	---	---	---	---	---	---	---	---	---	---	main		PDE6A
TC06000946.hg.1	RNU1-18P	RNA, U1 small nuclear 18, pseudogene	noncoding	0.040273	0.363	723	1125.83	0.64	down	---	ENST00000363062	ENSEMBL	ncrna:snRNA chromosome:GRCh37:6:122532794:122532957:1 gene:ENSG00000199932 gene_biotype:snRNA transcript_biotype:snRNA	chr6	+	122532794	122532957	---	---	---	---	---	---	---	---	---	---	---	---	---	---	main
TC06001436.hg.1	TOB2P1	transducer of ERBB2, 2 pseudogene 1	noncoding	0.021025	0.304	36.1	56.46	0.64	down	6p22.1	NR_002936	RefSeq // UCSC Genes	Homo sapiens transducer of ERBB2, 2 pseudogene 1 (TOB2P1), non-coding RNA. // ---	chr6	-	28183116	28186707	---	---	---	---	---	---	---	---	---	---	---	---	---	---	main
TC08001399.hg.1	---	ncrna:snRNA chromosome:GRCh37:8:90912949:90913052:-1 gene:ENSG00000207359 gene_biotype:snRNA transcript_biotype:snRNA	noncoding	0.0338268	0.346	34.97	54.48	0.64	down	---	ENST00000384629	ENSEMBL	ncrna:snRNA chromosome:GRCh37:8:90912949:90913052:-1 gene:ENSG00000207359 gene_biotype:snRNA transcript_biotype:snRNA	chr8	-	90912949	90913052	---	---	---	---	---	---	---	---	---	---	---	---	---	---	main
TC0X000455.hg.1	---	ncrna:snRNA chromosome:GRCh37:X:91053092:91053282:1 gene:ENSG00000222440 gene_biotype:snRNA transcript_biotype:snRNA	noncoding	0.0161516	0.282	16.42	25.5	0.64	down	---	ENST00000410508	ENSEMBL	ncrna:snRNA chromosome:GRCh37:X:91053092:91053282:1 gene:ENSG00000222440 gene_biotype:snRNA transcript_biotype:snRNA	chrX	+	91053092	91053282	---	---	---	---	---	---	---	---	---	---	---	---	---	---	main		PCDH11X
TC0X001011.hg.1	---	ncrna:snoRNA chromosome:GRCh37:X:48420090:48420189:-1 gene:ENSG00000239017 gene_biotype:snoRNA transcript_biotype:snoRNA	noncoding	0.0014121	0.138	24.92	38.87	0.64	down	---	ENST00000459609	ENSEMBL	ncrna:snoRNA chromosome:GRCh37:X:48420090:48420189:-1 gene:ENSG00000239017 gene_biotype:snoRNA transcript_biotype:snoRNA	chrX	-	48420090	48420189	---	---	---	---	---	---	---	---	---	---	---	---	---	---	main				TBC1D25
TC11000618.hg.1	---	ncrna:snRNA chromosome:GRCh37:11:64915055:64915249:1 gene:ENSG00000222477 gene_biotype:snRNA transcript_biotype:snRNA	noncoding	0.0107057	0.252	23.4	36.42	0.64	down	---	ENST00000410545	ENSEMBL	ncrna:snRNA chromosome:GRCh37:11:64915055:64915249:1 gene:ENSG00000222477 gene_biotype:snRNA transcript_biotype:snRNA	chr11	+	64915055	64915249	---	---	---	---	---	---	---	---	---	---	---	---	---	---	main
TC11000665.hg.1	---	ncrna:snRNA chromosome:GRCh37:11:66160920:66161083:1 gene:ENSG00000202317 gene_biotype:snRNA transcript_biotype:snRNA	noncoding	0.0075671	0.229	69.78	109.18	0.64	down	---	ENST00000365447	ENSEMBL	ncrna:snRNA chromosome:GRCh37:11:66160920:66161083:1 gene:ENSG00000202317 gene_biotype:snRNA transcript_biotype:snRNA	chr11	+	66160920	66161083	---	---	---	---	---	---	---	---	---	---	---	---	---	---	main
TC12000715.hg.1	---	ncrna:snRNA chromosome:GRCh37:12:93346415:93346521:1 gene:ENSG00000202534 gene_biotype:snRNA transcript_biotype:snRNA	noncoding	0.0315158	0.34	236.25	370.48	0.64	down	---	ENST00000365664	ENSEMBL	ncrna:snRNA chromosome:GRCh37:12:93346415:93346521:1 gene:ENSG00000202534 gene_biotype:snRNA transcript_biotype:snRNA	chr12	+	93346415	93346521	---	---	---	---	---	---	---	---	---	---	---	---	---	---	main
TC12001421.hg.1	---	ncrna:snRNA chromosome:GRCh37:12:45948373:45948442:-1 gene:ENSG00000239178 gene_biotype:snRNA transcript_biotype:snRNA	noncoding	0.0147987	0.277	1615.03	2515.47	0.64	down	---	ENST00000458848	ENSEMBL	ncrna:snRNA chromosome:GRCh37:12:45948373:45948442:-1 gene:ENSG00000239178 gene_biotype:snRNA transcript_biotype:snRNA	chr12	-	45948373	45948442	---	---	---	---	---	---	---	---	---	---	---	---	---	---	main
TC15002275.hg.1	---	accn=AF388194 class=mRNAlike lncRNA name=NULL ref=H-invitational v7.5 transcriptId=HIT000078802 cpcScore=1.0972900 cnci=-0.1192295	noncoding	0.0033645	0.182	295.28	460.39	0.64	down	---	n333159	NONCODE	accn=AF388194 class=mRNAlike lncRNA name=NULL ref=H-invitational v7.5 transcriptId=HIT000078802 cpcScore=1.0972900 cnci=-0.1192295	chr15	+	74325510	74325718	---	---	---	---	---	---	---	---	---	---	---	---	---	---	main		PML
TC15002646.hg.1	---	accn=Y18461 class=mRNAlike lncRNA name=NULL ref=H-invitational v7.5 transcriptId=HIT000326084 cpcScore=1.1883000 cnci=-0.1773462	noncoding	0.0147321	0.277	134.59	209.75	0.64	down	---	n336302	NONCODE	accn=Y18461 class=mRNAlike lncRNA name=NULL ref=H-invitational v7.5 transcriptId=HIT000326084 cpcScore=1.1883000 cnci=-0.1773462	chr15	-	79215359	79224794	---	---	---	---	---	---	---	---	---	---	---	---	---	---	main		CTSH
TC17001766.hg.1	---	ncrna:misc_RNA chromosome:GRCh37:17:58826301:58826407:-1 gene:ENSG00000252534 gene_biotype:misc_RNA transcript_biotype:misc_RNA	noncoding	0.0076267	0.229	5.55	8.71	0.64	down	---	ENST00000516725	ENSEMBL	ncrna:misc_RNA chromosome:GRCh37:17:58826301:58826407:-1 gene:ENSG00000252534 gene_biotype:misc_RNA transcript_biotype:misc_RNA	chr17	-	58826301	58826407	---	---	---	---	---	---	---	---	---	---	---	---	---	---	main				BCAS3
TC17002659.hg.1	---	accn=BC036881 class=mRNAlike lncRNA name=Human lncRNA ref=JounralRNA transcriptId=5210 cpcScore=-0.4540120 cnci=-0.0863147	noncoding	0.0239166	0.315	88	136.85	0.64	down	---	n342708	NONCODE	accn=BC036881 class=mRNAlike lncRNA name=Human lncRNA ref=JounralRNA transcriptId=5210 cpcScore=-0.4540120 cnci=-0.0863147	chr17	-	42634926	42636766	---	---	---	---	---	---	---	---	---	---	---	---	---	---	main				FZD2
TC18000218.hg.1	---	ncrna:snRNA chromosome:GRCh37:18:59058828:59058936:1 gene:ENSG00000206769 gene_biotype:snRNA transcript_biotype:snRNA	noncoding	0.0217236	0.305	703.93	1099.44	0.64	down	---	ENST00000384042	ENSEMBL	ncrna:snRNA chromosome:GRCh37:18:59058828:59058936:1 gene:ENSG00000206769 gene_biotype:snRNA transcript_biotype:snRNA	chr18	+	59058828	59058936	---	---	---	---	---	---	---	---	---	---	---	---	---	---	main		CDH20
TC18000240.hg.1	---	ncrna:snRNA chromosome:GRCh37:18:66526171:66526277:1 gene:ENSG00000207072 gene_biotype:snRNA transcript_biotype:snRNA	noncoding	0.0094546	0.243	1040.18	1626.82	0.64	down	---	ENST00000384344	ENSEMBL	ncrna:snRNA chromosome:GRCh37:18:66526171:66526277:1 gene:ENSG00000207072 gene_biotype:snRNA transcript_biotype:snRNA	chr18	+	66526171	66526277	---	---	---	---	---	---	---	---	---	---	---	---	---	---	main		CCDC102B
TC19002278.hg.1	---	accn=EU392448 class=mRNAlike lncRNA name=NULL ref=H-invitational v7.5 transcriptId=HIT000557658 cpcScore=2.9168100 cnci=-0.0675941 | accn=EU392455 class=mRNAlike lncRNA name=NULL ref=H-invitational v7.5 transcriptId=HIT000557665 cpcScore=5.2366500 cnci=-0.1022720 | accn=EU392462 class=mRNAlike lncRNA name=NULL ref=H-invitational v7.5 transcriptId=HIT000557672 cpcScore=2.2801400 cnci=-0.1980960	noncoding	0.0172006	0.288	210.8	328.06	0.64	down	---	n332372	NONCODE // NONCODE // NONCODE	accn=EU392448 class=mRNAlike lncRNA name=NULL ref=H-invitational v7.5 transcriptId=HIT000557658 cpcScore=2.9168100 cnci=-0.0675941 // accn=EU392455 class=mRNAlike lncRNA name=NULL ref=H-invitational v7.5 transcriptId=HIT000557665 cpcScore=5.2366500 cnci=-0.1022720 // accn=EU392462 class=mRNAlike lncRNA name=NULL ref=H-invitational v7.5 transcriptId=HIT000557672 cpcScore=2.2801400 cnci=-0.1980960	chr19	-	868460	891007	---	---	---	---	---	---	---	---	---	---	---	---	---	---	main	R3HDM4 5496bp;	MED16
TC20000329.hg.1	---	ncrna:misc_RNA chromosome:GRCh37:20:42973479:42973569:1 gene:ENSG00000201363 gene_biotype:misc_RNA transcript_biotype:misc_RNA	noncoding	0.021976	0.306	14.87	23.15	0.64	down	---	ENST00000364493	ENSEMBL	ncrna:misc_RNA chromosome:GRCh37:20:42973479:42973569:1 gene:ENSG00000201363 gene_biotype:misc_RNA transcript_biotype:misc_RNA	chr20	+	42973479	42973569	---	---	---	---	---	---	---	---	---	---	---	---	---	---	main		R3HDML
TC20000529.hg.1	---	ncrna:snRNA chromosome:GRCh37:20:62540308:62540472:1 gene:ENSG00000199805 gene_biotype:snRNA transcript_biotype:snRNA	noncoding	0.0357057	0.35	738.1	1150.12	0.64	down	---	ENST00000362935	ENSEMBL	ncrna:snRNA chromosome:GRCh37:20:62540308:62540472:1 gene:ENSG00000199805 gene_biotype:snRNA transcript_biotype:snRNA	chr20	+	62540308	62540472	---	---	---	---	---	---	---	---	---	---	---	---	---	---	main		DNAJC5
TC20001202.hg.1	---	accn=D82057 class=mRNAlike lncRNA name=Human lncRNA ref=JounralRNA transcriptId=5055 cpcScore=3.9066400 cnci=-0.0796491	noncoding	0.0059936	0.214	978.75	1526.93	0.64	down	---	n342556	NONCODE	accn=D82057 class=mRNAlike lncRNA name=Human lncRNA ref=JounralRNA transcriptId=5055 cpcScore=3.9066400 cnci=-0.0796491	chr20	+	35169919	35178224	---	---	---	---	---	---	---	---	---	---	---	---	---	---	main		MYL9
TC21000045.hg.1	---	ncrna:snRNA chromosome:GRCh37:21:18091317:18091476:1 gene:ENSG00000239023 gene_biotype:snRNA transcript_biotype:snRNA	noncoding	0.0079803	0.232	56.72	88.18	0.64	down	---	ENST00000458992	ENSEMBL	ncrna:snRNA chromosome:GRCh37:21:18091317:18091476:1 gene:ENSG00000239023 gene_biotype:snRNA transcript_biotype:snRNA	chr21	+	18091317	18091476	---	---	---	---	---	---	---	---	---	---	---	---	---	---	main
TC22001121.hg.1	---	accn=AF188530 class=mRNAlike lncRNA name=Human lncRNA ref=JounralRNA transcriptId=509 cpcScore=16.6683000 cnci=-0.1357930	noncoding	0.002849	0.171	249.83	390.6	0.64	down	---	n338121	NONCODE	accn=AF188530 class=mRNAlike lncRNA name=Human lncRNA ref=JounralRNA transcriptId=509 cpcScore=16.6683000 cnci=-0.1357930	chr22	+	41697679	41751977	---	---	---	---	---	---	---	---	---	---	---	---	---	---	main		ZC3H7B		RANGAP1
TC01004948.hg.1	---	accn=NR_030775 class=lncRNA name= ref=RefGeneNoncode transcriptId=NR_030775 cpcScore=2.2385100 cnci=-0.1180596	noncoding	0.002953	0.173	152.94	235.27	0.65	down	---	n408908	NONCODE	accn=NR_030775 class=lncRNA name= ref=RefGeneNoncode transcriptId=NR_030775 cpcScore=2.2385100 cnci=-0.1180596	chr1	+	201857797	201861715	---	---	---	---	---	---	---	---	---	---	---	---	---	---	main	IPO9 4375bp;	SHISA4
TC02004590.hg.1	---	linc-MZT2A-2 chr2:-:132384449-132384816	noncoding	0.0133647	0.269	541.81	835.55	0.65	down	---	TCONS_l2_00014908-XLOC_l2_008270	Broad TUCP	linc-MZT2A-2 chr2:-:132384449-132384816	chr2	-	132384450	132384816	---	---	---	---	---	---	---	---	---	---	---	---	---	---	main
TC03001083.hg.1	---	ncrna:snRNA chromosome:GRCh37:3:194935516:194935622:1 gene:ENSG00000206600 gene_biotype:snRNA transcript_biotype:snRNA	noncoding	0.0141122	0.274	815.47	1254.96	0.65	down	---	ENST00000383873	ENSEMBL	ncrna:snRNA chromosome:GRCh37:3:194935516:194935622:1 gene:ENSG00000206600 gene_biotype:snRNA transcript_biotype:snRNA	chr3	+	194935516	194935622	---	---	---	---	---	---	---	---	---	---	---	---	---	---	main				XXYLT1
TC03002524.hg.1	---	accn=NR_033429 class=lncRNA name= ref=RefGeneNoncode transcriptId=NR_033429 cpcScore=7.8104200 cnci=-0.1312372	noncoding	0.0027658	0.169	82.73	128.13	0.65	down	---	n409261	NONCODE	accn=NR_033429 class=lncRNA name= ref=RefGeneNoncode transcriptId=NR_033429 cpcScore=7.8104200 cnci=-0.1312372	chr3	+	127391781	127399769	---	---	---	---	---	---	---	---	---	---	---	---	---	---	main	PODXL2 129bp;	ABTB1
TC04000399.hg.1	---	ncrna:snRNA chromosome:GRCh37:4:73830895:73831020:1 gene:ENSG00000252955 gene_biotype:snRNA transcript_biotype:snRNA	noncoding	0.006108	0.214	12.85	19.86	0.65	down	---	ENST00000517146	ENSEMBL	ncrna:snRNA chromosome:GRCh37:4:73830895:73831020:1 gene:ENSG00000252955 gene_biotype:snRNA transcript_biotype:snRNA	chr4	+	73830895	73831020	---	---	---	---	---	---	---	---	---	---	---	---	---	---	main
TC04000560.hg.1	---	ncrna:snRNA chromosome:GRCh37:4:109573306:109573412:1 gene:ENSG00000206601 gene_biotype:snRNA transcript_biotype:snRNA	noncoding	0.0163203	0.283	33.79	52.32	0.65	down	---	ENST00000383874	ENSEMBL	ncrna:snRNA chromosome:GRCh37:4:109573306:109573412:1 gene:ENSG00000206601 gene_biotype:snRNA transcript_biotype:snRNA	chr4	+	109573306	109573412	---	---	---	---	---	---	---	---	---	---	---	---	---	---	main		OSTC
TC04000594.hg.1	---	ncrna:snRNA chromosome:GRCh37:4:117760435:117760541:1 gene:ENSG00000201752 gene_biotype:snRNA transcript_biotype:snRNA	noncoding	0.0173927	0.289	34.74	53.23	0.65	down	---	ENST00000364882	ENSEMBL	ncrna:snRNA chromosome:GRCh37:4:117760435:117760541:1 gene:ENSG00000201752 gene_biotype:snRNA transcript_biotype:snRNA	chr4	+	117760435	117760541	---	---	---	---	---	---	---	---	---	---	---	---	---	---	main
TC05001229.hg.1	---	ncrna:snRNA chromosome:GRCh37:5:31820671:31820745:-1 gene:ENSG00000252373 gene_biotype:snRNA transcript_biotype:snRNA	noncoding	0.0184382	0.293	1158.93	1792.54	0.65	down	---	ENST00000516564	ENSEMBL	ncrna:snRNA chromosome:GRCh37:5:31820671:31820745:-1 gene:ENSG00000252373 gene_biotype:snRNA transcript_biotype:snRNA	chr5	-	31820671	31820745	---	---	---	---	---	---	---	---	---	---	---	---	---	---	main				PDZD2
TC05001662.hg.1	---	ncrna:snRNA chromosome:GRCh37:5:108350535:108350641:-1 gene:ENSG00000206593 gene_biotype:snRNA transcript_biotype:snRNA	noncoding	0.0178415	0.291	599.35	919.6	0.65	down	---	ENST00000383866	ENSEMBL	ncrna:snRNA chromosome:GRCh37:5:108350535:108350641:-1 gene:ENSG00000206593 gene_biotype:snRNA transcript_biotype:snRNA	chr5	-	108350535	108350641	---	---	---	---	---	---	---	---	---	---	---	---	---	---	main				FER
TC06000026.hg.1	---	ncrna:miRNA chromosome:GRCh37:6:3177597:3177701:1 gene:ENSG00000221243 gene_biotype:miRNA transcript_biotype:miRNA	noncoding	0.0152043	0.278	135.96	208.46	0.65	down	---	ENST00000408316	ENSEMBL	ncrna:miRNA chromosome:GRCh37:6:3177597:3177701:1 gene:ENSG00000221243 gene_biotype:miRNA transcript_biotype:miRNA	chr6	+	3177597	3177701	---	---	---	---	---	---	---	---	---	---	---	---	---	---	main
TC06001945.hg.1	---	ncrna:misc_RNA chromosome:GRCh37:6:90608002:90608111:-1 gene:ENSG00000252891 gene_biotype:misc_RNA transcript_biotype:misc_RNA	noncoding	0.0005456	0.111	7.75	11.94	0.65	down	---	ENST00000517082	ENSEMBL	ncrna:misc_RNA chromosome:GRCh37:6:90608002:90608111:-1 gene:ENSG00000252891 gene_biotype:misc_RNA transcript_biotype:misc_RNA	chr6	-	90608002	90608111	---	---	---	---	---	---	---	---	---	---	---	---	---	---	main
TC0X001016.hg.1	---	ncrna:snRNA chromosome:GRCh37:X:48635380:48635486:-1 gene:ENSG00000207367 gene_biotype:snRNA transcript_biotype:snRNA	noncoding	0.0135491	0.27	819.29	1257.09	0.65	down	---	ENST00000384637	ENSEMBL	ncrna:snRNA chromosome:GRCh37:X:48635380:48635486:-1 gene:ENSG00000207367 gene_biotype:snRNA transcript_biotype:snRNA	chrX	-	48635380	48635486	---	---	---	---	---	---	---	---	---	---	---	---	---	---	main
TC0X001022.hg.1	---	ncrna:snRNA chromosome:GRCh37:X:48816440:48816543:-1 gene:ENSG00000223309 gene_biotype:snRNA transcript_biotype:snRNA	noncoding	0.0427702	0.368	17.73	27.13	0.65	down	---	ENST00000411377	ENSEMBL // UCSC Genes	ncrna:snRNA chromosome:GRCh37:X:48816440:48816543:-1 gene:ENSG00000223309 gene_biotype:snRNA transcript_biotype:snRNA // ---	chrX	-	48816440	48816543	---	---	---	---	---	---	---	---	---	---	---	---	---	---	main	KCND1 2096bp;		OTUD5 792bp;
TC0X002234.hg.1	---	accn=CR623208 class=mRNAlike lncRNA name=Human lncRNA ref=JounralRNA transcriptId=245 cpcScore=-0.9746310 cnci=-0.1009125	noncoding	0.0017516	0.146	146.14	226.23	0.65	down	---	n337862	NONCODE	accn=CR623208 class=mRNAlike lncRNA name=Human lncRNA ref=JounralRNA transcriptId=245 cpcScore=-0.9746310 cnci=-0.1009125	chrX	-	134166392	134167544	---	---	---	---	---	---	---	---	---	---	---	---	---	---	main			FAM127C 9826bp;	FAM127A
TC0Y000068.hg.1	---	ncrna:snRNA chromosome:GRCh37:Y:20648397:20648558:1 gene:ENSG00000252209 gene_biotype:snRNA transcript_biotype:snRNA	noncoding	0.0393164	0.36	25.45	39.02	0.65	down	---	ENST00000516400	ENSEMBL	ncrna:snRNA chromosome:GRCh37:Y:20648397:20648558:1 gene:ENSG00000252209 gene_biotype:snRNA transcript_biotype:snRNA	chrY	+	20648397	20648558	---	---	---	---	---	---	---	---	---	---	---	---	---	---	main			HSFY2 5068bp;
TC0Y000180.hg.1	---	ncrna:snRNA chromosome:GRCh37:Y:20995615:20995776:-1 gene:ENSG00000251970 gene_biotype:snRNA transcript_biotype:snRNA	noncoding	0.0393164	0.36	25.45	39.02	0.65	down	---	ENST00000516161	ENSEMBL	ncrna:snRNA chromosome:GRCh37:Y:20995615:20995776:-1 gene:ENSG00000251970 gene_biotype:snRNA transcript_biotype:snRNA	chrY	-	20995615	20995776	---	---	---	---	---	---	---	---	---	---	---	---	---	---	main			HSFY2 5067bp;
TC12002395.hg.1	---	accn=EF491814 class=mRNAlike lncRNA name=NULL ref=H-invitational v7.5 transcriptId=HIT000395541 cpcScore=0.2238000 cnci=-0.1321542	noncoding	0.0010543	0.13	66.16	101.65	0.65	down	---	n337568	NONCODE	accn=EF491814 class=mRNAlike lncRNA name=NULL ref=H-invitational v7.5 transcriptId=HIT000395541 cpcScore=0.2238000 cnci=-0.1321542	chr12	+	57561969	57563083	---	---	---	---	---	---	---	---	---	---	---	---	---	---	main		LRP1
TC14000276.hg.1	---	ncrna:snRNA chromosome:GRCh37:14:50151262:50151383:1 gene:ENSG00000221114 gene_biotype:snRNA transcript_biotype:snRNA	noncoding	0.0088066	0.237	22.47	34.77	0.65	down	---	ENST00000408187	ENSEMBL	ncrna:snRNA chromosome:GRCh37:14:50151262:50151383:1 gene:ENSG00000221114 gene_biotype:snRNA transcript_biotype:snRNA	chr14	+	50151262	50151383	---	---	---	---	---	---	---	---	---	---	---	---	---	---	main			KLHDC1 8440bp;	NEMF POLE2
TC14001286.hg.1	---	ncrna:snRNA chromosome:GRCh37:14:73713526:73713588:-1 gene:ENSG00000252839 gene_biotype:snRNA transcript_biotype:snRNA	noncoding	0.0150182	0.278	110.49	170.98	0.65	down	---	ENST00000517030	ENSEMBL	ncrna:snRNA chromosome:GRCh37:14:73713526:73713588:-1 gene:ENSG00000252839 gene_biotype:snRNA transcript_biotype:snRNA	chr14	-	73713526	73713588	---	---	---	---	---	---	---	---	---	---	---	---	---	---	main			LOC100287558 839bp;	PAPLN
TC16000400.hg.1	SLC6A10P	solute carrier family 6 (neurotransmitter transporter, creatine), member 10 (pseudogene)	noncoding	0.0003222	0.104	111.23	170.84	0.65	down	16p11.2	ENST00000359871	ENSEMBL // UCSC Genes	Transporter gene:ENSG00000198555 // ---	chr16	+	33778865	33786528	GO:0006836 // GO:0015881	neurotransmitter transport // creatine transport	--- // ---	GO:0005887 // GO:0016020	integral to plasma membrane // membrane	--- // ---	GO:0005328 // GO:0005308 // GO:0005309	neurotransmitter:sodium symporter activity // creatine transporter activity // creatine:sodium symporter activity	--- // --- // ---	---	---	---	---	---	main
TC16001103.hg.1	---	ncrna:snoRNA chromosome:GRCh37:16:50185553:50185642:-1 gene:ENSG00000252526 gene_biotype:snoRNA transcript_biotype:snoRNA	noncoding	0.0338164	0.346	15.57	23.85	0.65	down	---	ENST00000516717	ENSEMBL	ncrna:snoRNA chromosome:GRCh37:16:50185553:50185642:-1 gene:ENSG00000252526 gene_biotype:snoRNA transcript_biotype:snoRNA	chr16	-	50185553	50185642	---	---	---	---	---	---	---	---	---	---	---	---	---	---	main
TC16001219.hg.1	---	ncrna:snRNA chromosome:GRCh37:16:69209574:69209680:-1 gene:ENSG00000207083 gene_biotype:snRNA transcript_biotype:snRNA	noncoding	0.0037075	0.186	73.29	112.9	0.65	down	---	ENST00000384355	ENSEMBL	ncrna:snRNA chromosome:GRCh37:16:69209574:69209680:-1 gene:ENSG00000207083 gene_biotype:snRNA transcript_biotype:snRNA	chr16	-	69209574	69209680	---	---	---	---	---	---	---	---	---	---	---	---	---	---	main
TC17000891.hg.1	---	ncrna:snRNA chromosome:GRCh37:17:75916180:75916340:1 gene:ENSG00000238898 gene_biotype:snRNA transcript_biotype:snRNA	noncoding	0.008828	0.237	68.44	105.64	0.65	down	---	ENST00000459500	ENSEMBL // UCSC Genes	ncrna:snRNA chromosome:GRCh37:17:75916180:75916340:1 gene:ENSG00000238898 gene_biotype:snRNA transcript_biotype:snRNA // ---	chr17	+	75916180	75916340	---	---	---	---	---	---	---	---	---	---	---	---	---	---	main
TC17001172.hg.1	---	ncrna:snRNA chromosome:GRCh37:17:16041082:16041186:-1 gene:ENSG00000199674 gene_biotype:snRNA transcript_biotype:snRNA	noncoding	0.0203254	0.302	33.89	52.04	0.65	down	---	ENST00000362804	ENSEMBL // UCSC Genes	ncrna:snRNA chromosome:GRCh37:17:16041082:16041186:-1 gene:ENSG00000199674 gene_biotype:snRNA transcript_biotype:snRNA // ---	chr17	-	16041082	16041186	---	---	---	---	---	---	---	---	---	---	---	---	---	---	main		NCOR1
TC17001840.hg.1	LOC100499467	uncharacterized LOC100499467	noncoding	0.00603	0.214	58.72	89.95	0.65	down	---	NR_036488	RefSeq // ENSEMBL // UCSC Genes // Havana transcript // Havana transcript	Homo sapiens uncharacterized LOC100499467 (LOC100499467), non-coding RNA. // ensembl_havana_lincrna:lincRNA chromosome:GRCh37:17:70399469:70588941:-1 gene:ENSG00000227036 gene_biotype:lincRNA transcript_biotype:processed_transcript // --- // cdna:all chromosome:VEGA50:17:70399469:70588941:-1 Gene:OTTHUMG00000132227 // cdna:all chromosome:VEGA50:17:70380443:70588943:-1 Gene:OTTHUMG00000132227	chr17	-	70380443	70588943	---	---	---	---	---	---	---	---	---	---	---	---	---	---	main
TC19000170.hg.1	SNORD105	small nucleolar RNA, C/D box 105	noncoding	0.0247857	0.319	13.79	21.14	0.65	down	19p13.2	NR_004381	RefSeq // ENSEMBL // UCSC Genes	Homo sapiens small nucleolar RNA, C/D box 105 (SNORD105), small nucleolar RNA. // ncrna:snoRNA chromosome:GRCh37:19:10218327:10218411:1 gene:ENSG00000209645 gene_biotype:snoRNA transcript_biotype:snoRNA // ---	chr19	+	10218327	10218411	---	---	---	---	---	---	---	---	---	---	---	---	---	---	main		PPAN-P2RY11
TC19001567.hg.1	---	ncrna:snoRNA chromosome:GRCh37:19:42648206:42648277:-1 gene:ENSG00000252356 gene_biotype:snoRNA transcript_biotype:snoRNA	noncoding	0.0184017	0.293	20.05	30.93	0.65	down	---	ENST00000516547	ENSEMBL	ncrna:snoRNA chromosome:GRCh37:19:42648206:42648277:-1 gene:ENSG00000252356 gene_biotype:snoRNA transcript_biotype:snoRNA	chr19	-	42648206	42648277	---	---	---	---	---	---	---	---	---	---	---	---	---	---	main
TC19002300.hg.1	---	accn=S78080 class=mRNAlike lncRNA name=NULL ref=H-invitational v7.5 transcriptId=HIT000216774 cpcScore=1.8381700 cnci=-0.0127374	noncoding	0.0397678	0.362	569.55	870.55	0.65	down	---	n334377	NONCODE	accn=S78080 class=mRNAlike lncRNA name=NULL ref=H-invitational v7.5 transcriptId=HIT000216774 cpcScore=1.8381700 cnci=-0.0127374	chr19	-	5212350	5214479	---	---	---	---	---	---	---	---	---	---	---	---	---	---	main		PTPRS
TC19002303.hg.1	---	accn=BC052640 class=mRNAlike lncRNA name=NULL ref=H-invitational v7.5 transcriptId=HIT000099545 cpcScore=2.1047200 cnci=-0.1109238	noncoding	0.0433834	0.369	237.51	362.65	0.65	down	---	n333539	NONCODE	accn=BC052640 class=mRNAlike lncRNA name=NULL ref=H-invitational v7.5 transcriptId=HIT000099545 cpcScore=2.1047200 cnci=-0.1109238	chr19	-	5678364	5680518	---	---	---	---	---	---	---	---	---	---	---	---	---	---	main		C19orf70
TC19002377.hg.1	---	accn=NR_027297 class=lncRNA name= ref=RefGeneNoncode transcriptId=NR_027297 cpcScore=6.5780900 cnci=-0.1792898	noncoding	0.00216	0.157	180.4	276.58	0.65	down	---	n407775	NONCODE	accn=NR_027297 class=lncRNA name= ref=RefGeneNoncode transcriptId=NR_027297 cpcScore=6.5780900 cnci=-0.1792898	chr19	-	19040010	19050444	---	---	---	---	---	---	---	---	---	---	---	---	---	---	main		HOMER3	COPE 9811bp;
TC20000036.hg.1	---	ncrna:snRNA chromosome:GRCh37:20:3340683:3340789:1 gene:ENSG00000201294 gene_biotype:snRNA transcript_biotype:snRNA	noncoding	0.0314395	0.339	69.72	106.8	0.65	down	---	ENST00000364424	ENSEMBL // UCSC Genes	ncrna:snRNA chromosome:GRCh37:20:3340683:3340789:1 gene:ENSG00000201294 gene_biotype:snRNA transcript_biotype:snRNA // ---	chr20	+	3340683	3340789	---	---	---	---	---	---	---	---	---	---	---	---	---	---	main				C20orf194
TC20000120.hg.1	---	ncrna:snoRNA chromosome:GRCh37:20:18327542:18327641:1 gene:ENSG00000238897 gene_biotype:snoRNA transcript_biotype:snoRNA	noncoding	0.0377438	0.356	90.34	138.1	0.65	down	---	ENST00000459280	ENSEMBL	ncrna:snoRNA chromosome:GRCh37:20:18327542:18327641:1 gene:ENSG00000238897 gene_biotype:snoRNA transcript_biotype:snoRNA	chr20	+	18327542	18327641	---	---	---	---	---	---	---	---	---	---	---	---	---	---	main
TC6_mann_hap4000217.hg.1	---	cdna:all chromosome:VEGA50:6-MANN:2450975:2451018:1 Gene:OTTHUMG00000149217	noncoding	0.0209924	0.304	90.02	138.59	0.65	down	---	OTTHUMT00000310961	Havana transcript	cdna:all chromosome:VEGA50:6-MANN:2450975:2451018:1 Gene:OTTHUMG00000149217	chr6_mann_hap4	+	2514303	2514346	---	---	---	---	---	---	---	---	---	---	---	---	---	---	main
TC01002925.hg.1	---	ncrna:snoRNA chromosome:GRCh37:1:101694220:101694321:-1 gene:ENSG00000238296 gene_biotype:snoRNA transcript_biotype:snoRNA	noncoding	0.0484452	0.378	10.63	16.13	0.66	down	---	ENST00000459166	ENSEMBL	ncrna:snoRNA chromosome:GRCh37:1:101694220:101694321:-1 gene:ENSG00000238296 gene_biotype:snoRNA transcript_biotype:snoRNA	chr1	-	101694220	101694321	---	---	---	---	---	---	---	---	---	---	---	---	---	---	main
TC01003159.hg.1	---	ncrna:snRNA chromosome:GRCh37:1:149194106:149194269:-1 gene:ENSG00000207349 gene_biotype:snRNA transcript_biotype:snRNA	noncoding	0.0182377	0.292	1417.38	2136.38	0.66	down	---	ENST00000384619	ENSEMBL	ncrna:snRNA chromosome:GRCh37:1:149194106:149194269:-1 gene:ENSG00000207349 gene_biotype:snRNA transcript_biotype:snRNA	chr1	-	149194106	149194269	---	---	---	---	---	---	---	---	---	---	---	---	---	---	main
TC01004763.hg.1	---	accn=NULL class=mRNAlike lncRNA name=vega lncRNA ref=GENCODE transcriptId=OTTHUMT00000099026 cpcScore=-0.4652470 cnci=-0.3276436	noncoding	0.011866	0.26	276.26	417.74	0.66	down	---	n326366	NONCODE	accn=NULL class=mRNAlike lncRNA name=vega lncRNA ref=GENCODE transcriptId=OTTHUMT00000099026 cpcScore=-0.4652470 cnci=-0.3276436	chr1	+	155421802	155423819	---	---	---	---	---	---	---	---	---	---	---	---	---	---	main
TC04001350.hg.1	---	ncrna:misc_RNA chromosome:GRCh37:4:84557349:84557443:-1 gene:ENSG00000201633 gene_biotype:misc_RNA transcript_biotype:misc_RNA	noncoding	0.0107769	0.252	109.54	164.79	0.66	down	---	ENST00000364763	ENSEMBL	ncrna:misc_RNA chromosome:GRCh37:4:84557349:84557443:-1 gene:ENSG00000201633 gene_biotype:misc_RNA transcript_biotype:misc_RNA	chr4	-	84557349	84557443	---	---	---	---	---	---	---	---	---	---	---	---	---	---	main
TC04001999.hg.1	---	accn=NULL class=lincRNA name=Human lincRNA ref=Scripture Reconstruction LincRNAs By Luo transcriptId=linc_luo_1831 cpcScore=-1.5339700 cnci=-0.2444383	noncoding	0.0075067	0.229	27.04	41.25	0.66	down	---	n346281	NONCODE	accn=NULL class=lincRNA name=Human lincRNA ref=Scripture Reconstruction LincRNAs By Luo transcriptId=linc_luo_1831 cpcScore=-1.5339700 cnci=-0.2444383	chr4	+	42315851	42320121	---	---	---	---	---	---	---	---	---	---	---	---	---	---	main
TC05001064.hg.1	RNU1-17P	RNA, U1 small nuclear 17, pseudogene	noncoding	0.0249705	0.319	39.25	59.07	0.66	down	---	ENST00000363022	ENSEMBL	ncrna:snRNA chromosome:GRCh37:5:180156586:180156737:1 gene:ENSG00000199892 gene_biotype:snRNA transcript_biotype:snRNA	chr5	+	180156586	180156737	---	---	---	---	---	---	---	---	---	---	---	---	---	---	main
TC05002152.hg.1	LOC100859930	uncharacterized LOC100859930	noncoding	0.0195091	0.298	58.98	89.55	0.66	down	5q35.3	NR_045680	RefSeq // UCSC Genes // Havana transcript	Homo sapiens uncharacterized LOC100859930 (LOC100859930), non-coding RNA. // --- // cdna:all chromosome:VEGA50:5:180256954:180258605:-1 Gene:OTTHUMG00000162271	chr5	-	180256954	180258618	---	---	---	---	---	---	---	---	---	---	---	---	---	---	main
TC06000027.hg.1	---	ncrna:miRNA chromosome:GRCh37:6:3225766:3225870:1 gene:ENSG00000221674 gene_biotype:miRNA transcript_biotype:miRNA	noncoding	0.0128382	0.265	109.81	165.63	0.66	down	---	ENST00000408747	ENSEMBL // UCSC Genes	ncrna:miRNA chromosome:GRCh37:6:3225766:3225870:1 gene:ENSG00000221674 gene_biotype:miRNA transcript_biotype:miRNA // ---	chr6	+	3224986	3226037	---	---	---	---	---	---	---	---	---	---	---	---	---	---	main			PSMG4 5600bp;	TUBB2B
TC07000320.hg.1	RNU1-14P	RNA, U1 small nuclear 14, pseudogene	noncoding	0.0492563	0.379	512.2	779.59	0.66	down	---	ENST00000362759	ENSEMBL	ncrna:snRNA chromosome:GRCh37:7:53433751:53433902:1 gene:ENSG00000199629 gene_biotype:snRNA transcript_biotype:snRNA	chr7	+	53433751	53433902	---	---	---	---	---	---	---	---	---	---	---	---	---	---	main
TC07001020.hg.1	PRKAG2-AS1	PRKAG2 antisense RNA 1 (non-protein coding)	noncoding	0.0231275	0.31	13.33	20.24	0.66	down	---	NR_038926	RefSeq // ENSEMBL // ENSEMBL // UCSC Genes // Havana transcript // Havana transcript	Homo sapiens PRKAG2 antisense RNA 1 (non-protein coding) (PRKAG2-AS1), non-coding RNA. // cdna:known chromosome:GRCh37:7:151574127:151575899:1 gene:ENSG00000239911 gene_biotype:antisense transcript_biotype:antisense // cdna:putative chromosome:GRCh37:7:151574550:151576299:1 gene:ENSG00000239911 gene_biotype:antisense transcript_biotype:antisense // --- // cdna:all chromosome:VEGA50:7:151574127:15…	chr7	+	151574127	151576308	---	---	---	---	---	---	---	---	---	---	---	---	---	---	main				PRKAG2
TC07002098.hg.1	---	accn=AK090593 class=mRNAlike lncRNA name=Human lncRNA ref=JounralRNA transcriptId=5298 cpcScore=-0.2842850 cnci=-0.1918305	noncoding	0.0393653	0.361	27.04	40.68	0.66	down	---	n342795	NONCODE	accn=AK090593 class=mRNAlike lncRNA name=Human lncRNA ref=JounralRNA transcriptId=5298 cpcScore=-0.2842850 cnci=-0.1918305	chr7	+	1200128	1205594	---	---	---	---	---	---	---	---	---	---	---	---	---	---	main				ZFAND2A
TC08000110.hg.1	---	ncrna:snRNA chromosome:GRCh37:8:12901859:12901965:1 gene:ENSG00000206996 gene_biotype:snRNA transcript_biotype:snRNA	noncoding	0.0382834	0.358	202.14	306.48	0.66	down	---	ENST00000384269	ENSEMBL	ncrna:snRNA chromosome:GRCh37:8:12901859:12901965:1 gene:ENSG00000206996 gene_biotype:snRNA transcript_biotype:snRNA	chr8	+	12901859	12901965	---	---	---	---	---	---	---	---	---	---	---	---	---	---	main
TC09001389.hg.1	---	ncrna:snRNA chromosome:GRCh37:9:99955205:99955307:-1 gene:ENSG00000252721 gene_biotype:snRNA transcript_biotype:snRNA	noncoding	0.0236191	0.313	28.53	43.35	0.66	down	---	ENST00000516912	ENSEMBL	ncrna:snRNA chromosome:GRCh37:9:99955205:99955307:-1 gene:ENSG00000252721 gene_biotype:snRNA transcript_biotype:snRNA	chr9	-	99955205	99955307	---	---	---	---	---	---	---	---	---	---	---	---	---	---	main
TC09002759.hg.1	---	linc-DFNB31-2 chr9:-:117428715-117434029 | linc-DFNB31-2 chr9:-:117428717-117444346	noncoding	0.0441341	0.37	22.03	33.23	0.66	down	---	TCONS_l2_00030067-XLOC_l2_015354	Broad TUCP // Broad TUCP	linc-DFNB31-2 chr9:-:117428715-117434029 // linc-DFNB31-2 chr9:-:117428717-117444346	chr9	-	117428716	117444346	---	---	---	---	---	---	---	---	---	---	---	---	---	---	main		LOC100505478
TC09002809.hg.1	---	accn=NR_028048 class=lncRNA name= ref=RefGeneNoncode transcriptId=NR_028048 cpcScore=7.2982300 cnci=-0.0620811	noncoding	0.0202235	0.301	348.9	525.41	0.66	down	---	n408115	NONCODE	accn=NR_028048 class=lncRNA name= ref=RefGeneNoncode transcriptId=NR_028048 cpcScore=7.2982300 cnci=-0.0620811	chr9	-	131857073	131873070	---	---	---	---	---	---	---	---	---	---	---	---	---	---	main		CRAT
TC0X000910.hg.1	SCARNA9L	small Cajal body-specific RNA 9-like	noncoding	0.0073544	0.228	127.4	193.44	0.66	down	Xp22.12	NR_023358	RefSeq // ENSEMBL // ENSEMBL // UCSC Genes	Homo sapiens small Cajal body-specific RNA 9-like (SCARNA9L), guide RNA. // ncrna:snoRNA chromosome:GRCh37:X:20154424:20154503:-1 gene:ENSG00000201592 gene_biotype:snoRNA transcript_biotype:snoRNA // ncrna:snoRNA chromosome:GRCh37:X:20154184:20154253:-1 gene:ENSG00000201882 gene_biotype:snoRNA transcript_biotype:snoRNA // ---	chrX	-	20154184	20154531	---	---	---	---	---	---	---	---	---	---	---	---	---	---	main		EIF1AX
TC0X001104.hg.1	---	ncrna:snRNA chromosome:GRCh37:X:67321910:67321974:-1 gene:ENSG00000252145 gene_biotype:snRNA transcript_biotype:snRNA	noncoding	0.0165313	0.285	1449.24	2183.67	0.66	down	---	ENST00000516336	ENSEMBL	ncrna:snRNA chromosome:GRCh37:X:67321910:67321974:-1 gene:ENSG00000252145 gene_biotype:snRNA transcript_biotype:snRNA	chrX	-	67321910	67321974	---	---	---	---	---	---	---	---	---	---	---	---	---	---	main		OPHN1
TC0X001524.hg.1	MIR718	microRNA 718	noncoding	0.0354197	0.35	284	428.72	0.66	down	---	NR_031757	RefSeq // RefSeq // RefSeq // RefSeq // GenBank // ENSEMBL // ENSEMBL // ENSEMBL // ENSEMBL // ENSEMBL // ENSEMBL // UCSC Genes // UCSC Genes // UCSC Genes // UCSC Genes // UCSC Genes // ENSEMBL // GenBank // Havana transcript // Havana transcript // Havana transcript // Havana transcript // Havana transcript // Havana transcript // Havana transcript // Havana transcript // Havana transcript // H…	Homo sapiens microRNA 718 (MIR718), microRNA. // Homo sapiens interleukin-1 receptor-associated kinase 1 (IRAK1), transcript variant 2, mRNA. // Homo sapiens interleukin-1 receptor-associated kinase 1 (IRAK1), transcript variant 3, mRNA. // Homo sapiens interleukin-1 receptor-associated kinase 1 (IRAK1), transcript variant 1, mRNA. // Homo sapiens interleukin-1 receptor-associated kinase 1, mRNA …	chrX	-	153275951	153285440	GO:0000187 // GO:0001959 // GO:0002224 // GO:0002755 // GO:0002756 // GO:0006468 // GO:0006916 // GO:0007165 // GO:0007178 // GO:0007250 // GO:0007254 // GO:0008063 // GO:0016567 // GO:0031663 // GO:0032088 // GO:0032494 // GO:0032496 // GO:0034130 // GO:0034134 // GO:0034134 // GO:0034138 // GO:0034142 // GO:0035666 // GO:0035872 // GO:0038061 // GO:0043123 // GO:0043507 // GO:0045087 // GO:0045…	activation of MAPK activity // regulation of cytokine-mediated signaling pathway // toll-like receptor signaling pathway // MyD88-dependent toll-like receptor signaling pathway // MyD88-independent toll-like receptor signaling pathway // protein phosphorylation // anti-apoptosis // signal transduction // transmembrane receptor protein serine/threonine kinase signaling pathway // activation of NF-…	traceable author statement // inferred from mutant phenotype // traceable author statement // traceable author statement // traceable author statement // traceable author statement // traceable author statement // non-traceable author statement // non-traceable author statement // inferred from direct assay // traceable author statement // traceable author statement // traceable author statement …	GO:0005624 // GO:0005634 // GO:0005811 // GO:0005829 // GO:0005886 // GO:0010008 // GO:0045323 // GO:0005624 // GO:0005634 // GO:0005811 // GO:0005829 // GO:0005886 // GO:0010008 // GO:0045323 // GO:0005624 // GO:0005634 // GO:0005811 // GO:0005829 // GO:0005886 // GO:0010008 // GO:0045323 // GO:0005624 // GO:0005634 // GO:0005811 // GO:0005829 // GO:0005886 // GO:0010008 // GO:0045323 // GO:0005…	membrane fraction // nucleus // lipid particle // cytosol // plasma membrane // endosome membrane // interleukin-1 receptor complex // membrane fraction // nucleus // lipid particle // cytosol // plasma membrane // endosome membrane // interleukin-1 receptor complex // membrane fraction // nucleus // lipid particle // cytosol // plasma membrane // endosome membrane // interleukin-1 receptor compl…	inferred from electronic annotation // inferred from electronic annotation // inferred from sequence or structural similarity // traceable author statement // traceable author statement // traceable author statement // non-traceable author statement // inferred from electronic annotation // inferred from electronic annotation // inferred from sequence or structural similarity // traceable author …	GO:0004672 // GO:0004672 // GO:0004674 // GO:0004674 // GO:0004704 // GO:0004842 // GO:0005149 // GO:0005515 // GO:0005524 // GO:0016301 // GO:0042803 // GO:0042803 // GO:0046982 // GO:0004672 // GO:0004672 // GO:0004674 // GO:0004674 // GO:0004704 // GO:0004842 // GO:0005149 // GO:0005515 // GO:0005524 // GO:0016301 // GO:0042803 // GO:0042803 // GO:0046982 // GO:0004672 // GO:0004672 // GO:0004…	protein kinase activity // protein kinase activity // protein serine/threonine kinase activity // protein serine/threonine kinase activity // NF-kappaB-inducing kinase activity // ubiquitin-protein ligase activity // interleukin-1 receptor binding // protein binding // ATP binding // kinase activity // protein homodimerization activity // protein homodimerization activity // protein heterodimeriz…	inferred from direct assay // traceable author statement // not recorded // non-traceable author statement // traceable author statement // traceable author statement // inferred from electronic annotation // inferred from physical interaction // inferred from electronic annotation // inferred from direct assay // inferred from physical interaction // non-traceable author statement // inferred fr…	---	---	Pfam // Pfam // Pfam // Pfam // Pfam // Pfam // Pfam // Pfam // Pfam // Pfam // Pfam // Pfam // Pfam // Pfam // Pfam	IPR000488 // IPR000719 // IPR001245 // IPR000488 // IPR000719 // IPR001245 // IPR000488 // IPR000719 // IPR001245 // IPR000488 // IPR000719 // IPR001245 // IPR000488 // IPR000719 // IPR001245	Death // Protein kinase, catalytic domain // Serine-threonine/tyrosine-protein kinase catalytic domain // Death // Protein kinase, catalytic domain // Serine-threonine/tyrosine-protein kinase catalytic domain // Death // Protein kinase, catalytic domain // Serine-threonine/tyrosine-protein kinase catalytic domain // Death // Protein kinase, catalytic domain // Serine-threonine/tyrosine-protein ki…	main	MECP2 1584bp;
TC11000750.hg.1	---	ncrna:snoRNA chromosome:GRCh37:11:71815120:71815216:1 gene:ENSG00000238768 gene_biotype:snoRNA transcript_biotype:snoRNA	noncoding	0.0266553	0.326	32	48.4	0.66	down	---	ENST00000459046	ENSEMBL	ncrna:snoRNA chromosome:GRCh37:11:71815120:71815216:1 gene:ENSG00000238768 gene_biotype:snoRNA transcript_biotype:snoRNA	chr11	+	71815120	71815216	---	---	---	---	---	---	---	---	---	---	---	---	---	---	main		LRTOMT
TC11002206.hg.1	---	ncrna:misc_RNA chromosome:GRCh37:11:95206436:95206538:-1 gene:ENSG00000201204 gene_biotype:misc_RNA transcript_biotype:misc_RNA	noncoding	0.001296	0.136	12.98	19.79	0.66	down	---	ENST00000364334	ENSEMBL	ncrna:misc_RNA chromosome:GRCh37:11:95206436:95206538:-1 gene:ENSG00000201204 gene_biotype:misc_RNA transcript_biotype:misc_RNA	chr11	-	95206436	95206538	---	---	---	---	---	---	---	---	---	---	---	---	---	---	main
TC12000518.hg.1	---	ncrna:snoRNA chromosome:GRCh37:12:57255159:57255292:1 gene:ENSG00000212383 gene_biotype:snoRNA transcript_biotype:snoRNA	noncoding	0.0065939	0.219	32.59	49.18	0.66	down	---	ENST00000391081	ENSEMBL	ncrna:snoRNA chromosome:GRCh37:12:57255159:57255292:1 gene:ENSG00000212383 gene_biotype:snoRNA transcript_biotype:snoRNA	chr12	+	57255159	57255292	---	---	---	---	---	---	---	---	---	---	---	---	---	---	main
TC12003078.hg.1	---	accn=NR_038118 class=lncRNA name= ref=RefGeneNoncode transcriptId=NR_038118 cpcScore=1.9842500 cnci=-0.1823871	noncoding	0.0352573	0.35	250.17	376.69	0.66	down	---	n410717	NONCODE	accn=NR_038118 class=lncRNA name= ref=RefGeneNoncode transcriptId=NR_038118 cpcScore=1.9842500 cnci=-0.1823871	chr12	-	109991521	110011358	---	---	---	---	---	---	---	---	---	---	---	---	---	---	main		MMAB		MVK
TC14000621.hg.1	---	ncrna:snRNA chromosome:GRCh37:14:99910643:99910749:1 gene:ENSG00000199789 gene_biotype:snRNA transcript_biotype:snRNA	noncoding	0.0043659	0.194	58.13	87.58	0.66	down	---	ENST00000362919	ENSEMBL	ncrna:snRNA chromosome:GRCh37:14:99910643:99910749:1 gene:ENSG00000199789 gene_biotype:snRNA transcript_biotype:snRNA	chr14	+	99910643	99910749	---	---	---	---	---	---	---	---	---	---	---	---	---	---	main				SETD3
TC14001233.hg.1	---	ncrna:misc_RNA chromosome:GRCh37:14:66644245:66644353:-1 gene:ENSG00000200860 gene_biotype:misc_RNA transcript_biotype:misc_RNA	noncoding	0.0270019	0.327	10.99	16.78	0.66	down	---	ENST00000363990	ENSEMBL // UCSC Genes	ncrna:misc_RNA chromosome:GRCh37:14:66644245:66644353:-1 gene:ENSG00000200860 gene_biotype:misc_RNA transcript_biotype:misc_RNA // ---	chr14	-	66644245	66644353	---	---	---	---	---	---	---	---	---	---	---	---	---	---	main
TC14001309.hg.1	---	havana:lincRNA chromosome:GRCh37:14:75081510:75083350:-1 gene:ENSG00000258976 gene_biotype:lincRNA transcript_biotype:lincRNA | havana:lincRNA chromosome:GRCh37:14:75081396:75083315:-1 gene:ENSG00000258976 gene_biotype:lincRNA transcript_biotype:lincRNA	noncoding	0.0072003	0.226	23.72	36.03	0.66	down	---	ENST00000555313	ENSEMBL // ENSEMBL	havana:lincRNA chromosome:GRCh37:14:75081510:75083350:-1 gene:ENSG00000258976 gene_biotype:lincRNA transcript_biotype:lincRNA // havana:lincRNA chromosome:GRCh37:14:75081396:75083315:-1 gene:ENSG00000258976 gene_biotype:lincRNA transcript_biotype:lincRNA	chr14	-	75081396	75083350	---	---	---	---	---	---	---	---	---	---	---	---	---	---	main			LTBP2 2362bp;
TC15001648.hg.1	MIR4513	microRNA 4513	noncoding	0.0416989	0.365	64.87	98.43	0.66	down	---	NR_039738	RefSeq // UCSC Genes	Homo sapiens microRNA 4513 (MIR4513), microRNA. // ---	chr15	-	75081013	75081098	---	---	---	---	---	---	---	---	---	---	---	---	---	---	main				CSK
TC15001790.hg.1	---	ncrna:snRNA chromosome:GRCh37:15:85481647:85481753:-1 gene:ENSG00000207037 gene_biotype:snRNA transcript_biotype:snRNA	noncoding	0.0048124	0.201	8.42	12.79	0.66	down	---	ENST00000384310	ENSEMBL	ncrna:snRNA chromosome:GRCh37:15:85481647:85481753:-1 gene:ENSG00000207037 gene_biotype:snRNA transcript_biotype:snRNA	chr15	-	85481647	85481753	---	---	---	---	---	---	---	---	---	---	---	---	---	---	main				SLC28A1
TC16000572.hg.1	---	ncrna:misc_RNA chromosome:GRCh37:16:69814940:69815031:1 gene:ENSG00000252670 gene_biotype:misc_RNA transcript_biotype:misc_RNA	noncoding	0.0390202	0.36	13.25	20.07	0.66	down	---	ENST00000516861	ENSEMBL	ncrna:misc_RNA chromosome:GRCh37:16:69814940:69815031:1 gene:ENSG00000252670 gene_biotype:misc_RNA transcript_biotype:misc_RNA	chr16	+	69814940	69815031	---	---	---	---	---	---	---	---	---	---	---	---	---	---	main		WWP2
TC16000776.hg.1	SNORD60	small nucleolar RNA, C/D box 60	noncoding	0.0225991	0.309	924.82	1404.41	0.66	down	16p13.3	NR_002736	RefSeq // ENSEMBL // UCSC Genes	Homo sapiens small nucleolar RNA, C/D box 60 (SNORD60), small nuclear RNA. // ncrna:snoRNA chromosome:GRCh37:16:2205024:2205106:-1 gene:ENSG00000206630 gene_biotype:snoRNA transcript_biotype:snoRNA // ---	chr16	-	2205024	2205106	---	---	---	---	---	---	---	---	---	---	---	---	---	---	main
TC16001854.hg.1	---	accn=NR_003083 class=lncRNA name= ref=RefGeneNoncode transcriptId=NR_003083 cpcScore=7.1593700 cnci=-0.0750099	noncoding	0.0038866	0.188	103.71	156.8	0.66	down	---	n405862	NONCODE	accn=NR_003083 class=lncRNA name= ref=RefGeneNoncode transcriptId=NR_003083 cpcScore=7.1593700 cnci=-0.0750099	chr16	-	32888797	32896463	---	---	---	---	---	---	---	---	---	---	---	---	---	---	main
TC17000494.hg.1	RNY4P8	RNA, Ro-associated Y4 pseudogene 8	noncoding	0.0229591	0.31	17.99	27.11	0.66	down	17q21.2	ENST00000363865	ENSEMBL	ncrna:misc_RNA chromosome:GRCh37:17:38399475:38399571:1 gene:ENSG00000200735 gene_biotype:misc_RNA transcript_biotype:misc_RNA	chr17	+	38399475	38399571	---	---	---	---	---	---	---	---	---	---	---	---	---	---	main		WIPF2
TC17000816.hg.1	LOC124685	myosin, light chain 6, alkali, smooth muscle and non-muscle pseudogene	noncoding	0.0029781	0.174	58.96	89.54	0.66	down	17q24.3	ENST00000545441	ENSEMBL	cdna:known chromosome:GRCh37:17:69617122:69617577:1 gene:ENSG00000228118 gene_biotype:pseudogene transcript_biotype:retrotransposed	chr17	+	69617122	69617577	---	---	---	---	---	---	---	---	---	---	---	---	---	---	main
TC17001741.hg.1	---	ncrna:snRNA chromosome:GRCh37:17:56754935:56755098:-1 gene:ENSG00000206917 gene_biotype:snRNA transcript_biotype:snRNA	noncoding	0.0240174	0.315	35.85	53.94	0.66	down	---	ENST00000384190	ENSEMBL	ncrna:snRNA chromosome:GRCh37:17:56754935:56755098:-1 gene:ENSG00000206917 gene_biotype:snRNA transcript_biotype:snRNA	chr17	-	56754935	56755098	---	---	---	---	---	---	---	---	---	---	---	---	---	---	main		TEX14
TC17002639.hg.1	---	accn=AK057023 class=mRNAlike lncRNA name=Human lncRNA ref=JounralRNA transcriptId=5205 cpcScore=1.5120100 cnci=-0.1102514	noncoding	0.0104182	0.25	154.49	232.8	0.66	down	---	n342703	NONCODE	accn=AK057023 class=mRNAlike lncRNA name=Human lncRNA ref=JounralRNA transcriptId=5205 cpcScore=1.5120100 cnci=-0.1102514	chr17	-	40704456	40706766	---	---	---	---	---	---	---	---	---	---	---	---	---	---	main				HSD17B1
TC18000176.hg.1	SCARNA17	small Cajal body-specific RNA 17	noncoding	0.008966	0.238	304.71	463.8	0.66	down	18q21.1	NR_003003	RefSeq // ENSEMBL // ENSEMBL // UCSC Genes	Homo sapiens small Cajal body-specific RNA 17 (SCARNA17), guide RNA. // ncrna:snoRNA chromosome:GRCh37:18:47340503:47340646:1 gene:ENSG00000251992 gene_biotype:snoRNA transcript_biotype:snoRNA // ncrna:snoRNA chromosome:GRCh37:18:47340731:47340813:1 gene:ENSG00000252139 gene_biotype:snoRNA transcript_biotype:snoRNA // ---	chr18	+	47340393	47340813	---	---	---	---	---	---	---	---	---	---	---	---	---	---	main
TC18000518.hg.1	---	ncrna:snRNA chromosome:GRCh37:18:48810103:48810266:-1 gene:ENSG00000207154 gene_biotype:snRNA transcript_biotype:snRNA	noncoding	0.0115779	0.259	200.67	304.98	0.66	down	---	ENST00000384425	ENSEMBL	ncrna:snRNA chromosome:GRCh37:18:48810103:48810266:-1 gene:ENSG00000207154 gene_biotype:snRNA transcript_biotype:snRNA	chr18	-	48810103	48810266	---	---	---	---	---	---	---	---	---	---	---	---	---	---	main
TC19000889.hg.1	---	ncrna:snoRNA chromosome:GRCh37:19:55678539:55678642:1 gene:ENSG00000239137 gene_biotype:snoRNA transcript_biotype:snoRNA	noncoding	0.0285563	0.332	38.89	59.28	0.66	down	---	ENST00000459370	ENSEMBL	ncrna:snoRNA chromosome:GRCh37:19:55678539:55678642:1 gene:ENSG00000239137 gene_biotype:snoRNA transcript_biotype:snoRNA	chr19	+	55678539	55678642	---	---	---	---	---	---	---	---	---	---	---	---	---	---	main
TC19002185.hg.1	---	accn=CR617899 class=mRNAlike lncRNA name=Human lncRNA ref=JounralRNA transcriptId=4899 cpcScore=1.2660000 cnci=-0.1826837	noncoding	0.0226464	0.309	104.68	158.08	0.66	down	---	n342407	NONCODE	accn=CR617899 class=mRNAlike lncRNA name=Human lncRNA ref=JounralRNA transcriptId=4899 cpcScore=1.2660000 cnci=-0.1826837	chr19	+	48281921	48287938	---	---	---	---	---	---	---	---	---	---	---	---	---	---	main	GLTSCR2 7780bp;	SEPW1
TC20000098.hg.1	---	ncrna:snRNA chromosome:GRCh37:20:14332966:14333071:1 gene:ENSG00000199570 gene_biotype:snRNA transcript_biotype:snRNA	noncoding	0.0174929	0.29	7.49	11.35	0.66	down	---	ENST00000362700	ENSEMBL	ncrna:snRNA chromosome:GRCh37:20:14332966:14333071:1 gene:ENSG00000199570 gene_biotype:snRNA transcript_biotype:snRNA	chr20	+	14332966	14333071	---	---	---	---	---	---	---	---	---	---	---	---	---	---	main		MACROD2
TC20001360.hg.1	---	accn=NR_045090 class=lncRNA name= ref=RefGeneNoncode transcriptId=NR_045090 cpcScore=3.2048300 cnci=-0.1713475	noncoding	0.0009128	0.126	496.58	748.25	0.66	down	---	n411754	NONCODE	accn=NR_045090 class=lncRNA name= ref=RefGeneNoncode transcriptId=NR_045090 cpcScore=3.2048300 cnci=-0.1713475	chr20	+	62496581	62522898	---	---	---	---	---	---	---	---	---	---	---	---	---	---	main	ABHD16B 1922bp;	TPD52L2	DNAJC5 3557bp;
TC20001679.hg.1	---	accn=Z70769 class=mRNAlike lncRNA name=Human lncRNA ref=JounralRNA transcriptId=2179 cpcScore=-0.6074890 cnci=-0.3096417	noncoding	0.0441392	0.37	214.69	325.9	0.66	down	---	n339733	NONCODE	accn=Z70769 class=mRNAlike lncRNA name=Human lncRNA ref=JounralRNA transcriptId=2179 cpcScore=-0.6074890 cnci=-0.3096417	chr20	-	57486024	57486241	---	---	---	---	---	---	---	---	---	---	---	---	---	---	main				GNAS
TC21000447.hg.1	---	ncrna:snoRNA chromosome:GRCh37:21:39559551:39559656:-1 gene:ENSG00000238581 gene_biotype:snoRNA transcript_biotype:snoRNA	noncoding	0.0024908	0.165	50.86	76.77	0.66	down	---	ENST00000459411	ENSEMBL	ncrna:snoRNA chromosome:GRCh37:21:39559551:39559656:-1 gene:ENSG00000238581 gene_biotype:snoRNA transcript_biotype:snoRNA	chr21	-	39559551	39559656	---	---	---	---	---	---	---	---	---	---	---	---	---	---	main
TC02002576.hg.1	---	ncrna:snoRNA chromosome:GRCh37:2:179887984:179888105:-1 gene:ENSG00000252000 gene_biotype:snoRNA transcript_biotype:snoRNA	noncoding	0.0482335	0.378	30.51	20.19	1.51	up	---	ENST00000516191	ENSEMBL	ncrna:snoRNA chromosome:GRCh37:2:179887984:179888105:-1 gene:ENSG00000252000 gene_biotype:snoRNA transcript_biotype:snoRNA	chr2	-	179887984	179888105	---	---	---	---	---	---	---	---	---	---	---	---	---	---	main		CCDC141
TC07001978.hg.1	OR2A9P	olfactory receptor, family 2, subfamily A, member 9 pseudogene	noncoding	0.0006469	0.116	33.98	22.43	1.51	up	7q35	NR_002157	RefSeq // RefSeq // ENSEMBL // ENSEMBL // UCSC Genes // UCSC Genes // UCSC Genes // UCSC Genes // Havana transcript // Havana transcript // Havana transcript // Havana transcript // Havana transcript // Havana transcript // Havana transcript // Havana transcript // Havana transcript // Havana transcript // Havana transcript // Havana transcript // Havana transcript // Havana transcript // Havana …	Homo sapiens olfactory receptor, family 2, subfamily A, member 9 pseudogene (OR2A9P), non-coding RNA. // Homo sapiens olfactory receptor, family 2, subfamily A, member 20 pseudogene (OR2A20P), non-coding RNA. // havana:lincRNA chromosome:GRCh37:7:143948418:144052622:-1 gene:ENSG00000244479 gene_biotype:lincRNA transcript_biotype:lincRNA // cdna:known chromosome:GRCh37:7:143947138:143950050:-1 gen…	chr7	-	143947138	144053274	---	---	---	---	---	---	---	---	---	GenMAPP // GenMAPP	GPCRDB_Other // GPCRDB_Other	---	---	---	main		CTAGE4 OR2A7 OR2A7		ARHGEF5 OR2A42
TC12002457.hg.1	---	linc-ZDHHC17-1 chr12:+:76646054-76691515 | linc-ZDHHC17-1 chr12:+:76653592-76686085 | linc-ZDHHC17-1 chr12:+:76653603-76686051 | linc-ZDHHC17-1 chr12:+:76653617-76687671 | linc-ZDHHC17-1 chr12:+:76687693-76698873 | linc-ZDHHC17-1 chr12:+:76687752-76691515	noncoding	0.0422492	0.366	64.64	42.79	1.51	up	---	TCONS_00020476-XLOC_009810	Rinn lincRNAs // Rinn lincRNAs // Rinn lincRNAs // Rinn lincRNAs // Rinn lincRNAs // Rinn lincRNAs	linc-ZDHHC17-1 chr12:+:76646054-76691515 // linc-ZDHHC17-1 chr12:+:76653592-76686085 // linc-ZDHHC17-1 chr12:+:76653603-76686051 // linc-ZDHHC17-1 chr12:+:76653617-76687671 // linc-ZDHHC17-1 chr12:+:76687693-76698873 // linc-ZDHHC17-1 chr12:+:76687752-76691515	chr12	+	76646055	76698873	---	---	---	---	---	---	---	---	---	---	---	---	---	---	main
TC19002571.hg.1	---	linc-ZNF816 chr19:-:53471432-53490059 | linc-ZNF816 chr19:-:53471504-53496784 | linc-ZNF816 chr19:-:53482072-53496812 | linc-ZNF816 chr19:-:53483701-53485913 | linc-ZNF816 chr19:-:53484141-53496744 | linc-ZNF816 chr19:-:53487858-53490127	noncoding	0.0008743	0.125	64.73	42.87	1.51	up	---	TCONS_l2_00013206-XLOC_l2_007112	Broad TUCP // Broad TUCP // Broad TUCP // Broad TUCP // Broad TUCP // Broad TUCP	linc-ZNF816 chr19:-:53471432-53490059 // linc-ZNF816 chr19:-:53471504-53496784 // linc-ZNF816 chr19:-:53482072-53496812 // linc-ZNF816 chr19:-:53483701-53485913 // linc-ZNF816 chr19:-:53484141-53496744 // linc-ZNF816 chr19:-:53487858-53490127	chr19	-	53471433	53496812	---	---	---	---	---	---	---	---	---	---	---	---	---	---	main
TC01004694.hg.1	---	accn=NULL class=mRNAlike lncRNA name=vega lncRNA ref=GENCODE transcriptId=OTTHUMT00000100088 cpcScore=-1.2355700 cnci=-0.3468063	noncoding	0.0206375	0.303	12.15	8	1.52	up	---	n326396	NONCODE	accn=NULL class=mRNAlike lncRNA name=vega lncRNA ref=GENCODE transcriptId=OTTHUMT00000100088 cpcScore=-1.2355700 cnci=-0.3468063	chr1	+	145636538	145638085	---	---	---	---	---	---	---	---	---	---	---	---	---	---	main		RNF115
TC01006043.hg.1	---	accn=AK126723 class=mRNAlike lncRNA name=Human lncRNA ref=JounralRNA transcriptId=4835 cpcScore=-0.8688660 cnci=-0.1799188	noncoding	0.0202064	0.301	98.37	64.73	1.52	up	---	n342343	NONCODE	accn=AK126723 class=mRNAlike lncRNA name=Human lncRNA ref=JounralRNA transcriptId=4835 cpcScore=-0.8688660 cnci=-0.1799188	chr1	-	202590417	202594367	---	---	---	---	---	---	---	---	---	---	---	---	---	---	main		SYT2
TC05002774.hg.1	---	accn=Z36844 class=mRNAlike lncRNA name=NULL ref=H-invitational v7.5 transcriptId=HIT000327152 cpcScore=0.7991560 cnci=-0.1541146	noncoding	0.0418742	0.365	1195.51	786.07	1.52	up	---	n336617	NONCODE	accn=Z36844 class=mRNAlike lncRNA name=NULL ref=H-invitational v7.5 transcriptId=HIT000327152 cpcScore=0.7991560 cnci=-0.1541146	chr5	+	177634134	177637709	---	---	---	---	---	---	---	---	---	---	---	---	---	---	main		HNRNPAB		AGXT2L2
TC07000147.hg.1	---	ncrna:snRNA chromosome:GRCh37:7:23490277:23490341:1 gene:ENSG00000252590 gene_biotype:snRNA transcript_biotype:snRNA	noncoding	0.0269769	0.327	27.24	17.89	1.52	up	---	ENST00000516781	ENSEMBL	ncrna:snRNA chromosome:GRCh37:7:23490277:23490341:1 gene:ENSG00000252590 gene_biotype:snRNA transcript_biotype:snRNA	chr7	+	23490277	23490341	---	---	---	---	---	---	---	---	---	---	---	---	---	---	main				IGF2BP3
TC07003218.hg.1	---	accn=NULL class=lncRNA name= ref=EnsemblNoncode transcriptId=ENST00000479887 cpcScore=5.8938100 cnci=-0.2605396 | accn=NR_002157 class=lncRNA name= ref=RefGeneNoncode transcriptId=NR_002157 cpcScore=5.8887300 cnci=-0.2179154 | accn=NULL class=lncRNA name= ref=EnsemblNoncode transcriptId=ENST00000496731 cpcScore=6.8377600 cnci=-0.0801181 | accn=NULL class=lncRNA name= ref=EnsemblNoncode transcript…	noncoding	0.0004506	0.107	31.51	20.75	1.52	up	---	n379210	NONCODE // NONCODE // NONCODE // NONCODE // NONCODE // NONCODE // NONCODE // NONCODE // NONCODE // NONCODE // NONCODE // NONCODE // NONCODE // NONCODE // NONCODE // NONCODE // NONCODE // NONCODE // NONCODE // NONCODE	accn=NULL class=lncRNA name= ref=EnsemblNoncode transcriptId=ENST00000479887 cpcScore=5.8938100 cnci=-0.2605396 // accn=NR_002157 class=lncRNA name= ref=RefGeneNoncode transcriptId=NR_002157 cpcScore=5.8887300 cnci=-0.2179154 // accn=NULL class=lncRNA name= ref=EnsemblNoncode transcriptId=ENST00000496731 cpcScore=6.8377600 cnci=-0.0801181 // accn=NULL class=lncRNA name= ref=EnsemblNoncode transcr…	chr7	-	143947138	144053274	---	---	---	---	---	---	---	---	---	---	---	---	---	---	main		CTAGE4 OR2A7 OR2A7		ARHGEF5 OR2A42
TC09001199.hg.1	LOC100507299	uncharacterized LOC100507299	noncoding	0.0367066	0.353	42.28	27.8	1.52	up	---	NR_039990	RefSeq // UCSC Genes // UCSC Genes	Homo sapiens uncharacterized LOC100507299 (LOC100507299), non-coding RNA. // --- // ---	chr9	-	72808914	72873790	---	---	---	---	---	---	---	---	---	---	---	---	---	---	main				MAMDC2
TC12001748.hg.1	---	cdna:known chromosome:GRCh37:12:75956982:76377795:-1 gene:ENSG00000258077 gene_biotype:processed_transcript transcript_biotype:processed_transcript	noncoding	0.0475107	0.376	47.71	31.43	1.52	up	---	ENST00000552856	ENSEMBL	cdna:known chromosome:GRCh37:12:75956982:76377795:-1 gene:ENSG00000258077 gene_biotype:processed_transcript transcript_biotype:processed_transcript	chr12	-	75956982	76377795	---	---	---	---	---	---	---	---	---	---	---	---	---	---	main
TC01004719.hg.1	---	accn=NULL class=lincRNA name=Human lincRNA ref=Scripture Reconstruction LincRNAs By Luo transcriptId=linc_luo_1985 cpcScore=-1.3175300 cnci=-0.1294021 | accn=NULL class=lncRNA name= ref=UCSCGeneNoncode transcriptId=uc010pbc.1 cpcScore=1.9992100 cnci=-0.2247800 | accn=NULL class=lncRNA name= ref=UCSCGeneNoncode transcriptId=uc010pbd.1 cpcScore=0.1547390 cnci=-0.2293625 | linc-PPIAL4A-4 chr1:+:1489…	noncoding	0.0365474	0.353	88.89	58.23	1.53	up	---	n346435	NONCODE // NONCODE // NONCODE // Broad TUCP // Broad TUCP // Broad TUCP // Broad TUCP // Broad TUCP // Broad TUCP // Broad TUCP // Broad TUCP	accn=NULL class=lincRNA name=Human lincRNA ref=Scripture Reconstruction LincRNAs By Luo transcriptId=linc_luo_1985 cpcScore=-1.3175300 cnci=-0.1294021 // accn=NULL class=lncRNA name= ref=UCSCGeneNoncode transcriptId=uc010pbc.1 cpcScore=1.9992100 cnci=-0.2247800 // accn=NULL class=lncRNA name= ref=UCSCGeneNoncode transcriptId=uc010pbd.1 cpcScore=0.1547390 cnci=-0.2293625 // linc-PPIAL4A-4 chr1:+:1…	chr1	+	148928062	148953054	---	---	---	---	---	---	---	---	---	---	---	---	---	---	main
TC02003488.hg.1	---	linc-SH3RF3 chr2:+:109686928-109690815	noncoding	0.0055333	0.211	19.24	12.56	1.53	up	---	TCONS_00003817-XLOC_001621	Rinn lincRNAs	linc-SH3RF3 chr2:+:109686928-109690815	chr2	+	109686929	109690815	---	---	---	---	---	---	---	---	---	---	---	---	---	---	main
TC02004216.hg.1	---	accn=AF086285 class=mRNAlike lncRNA name=NULL ref=H-invitational v7.5 transcriptId=HIT000067164 cpcScore=-1.3753000 cnci=-0.2471589	noncoding	0.0195259	0.298	40.67	26.56	1.53	up	---	n332904	NONCODE	accn=AF086285 class=mRNAlike lncRNA name=NULL ref=H-invitational v7.5 transcriptId=HIT000067164 cpcScore=-1.3753000 cnci=-0.2471589	chr2	-	46755018	46768722	---	---	---	---	---	---	---	---	---	---	---	---	---	---	main		ATP6V1E2
TC02004494.hg.1	---	accn=NULL class=lncRNA name= ref=UCSCGeneNoncode transcriptId=uc002tfa.1 cpcScore=0.1724600 cnci=-0.3736522	noncoding	0.0370487	0.354	21.84	14.27	1.53	up	---	n383698	NONCODE	accn=NULL class=lncRNA name= ref=UCSCGeneNoncode transcriptId=uc002tfa.1 cpcScore=0.1724600 cnci=-0.3736522	chr2	-	110339915	110342057	---	---	---	---	---	---	---	---	---	---	---	---	---	---	main		41527
TC02004601.hg.1	---	accn=AK094176 class=mRNAlike lncRNA name=Human lncRNA ref=JounralRNA transcriptId=1392 cpcScore=-1.0987800 cnci=-0.4679856	noncoding	0.0049258	0.203	12.72	8.32	1.53	up	---	n338964	NONCODE	accn=AK094176 class=mRNAlike lncRNA name=Human lncRNA ref=JounralRNA transcriptId=1392 cpcScore=-1.0987800 cnci=-0.4679856	chr2	-	135622097	135624192	---	---	---	---	---	---	---	---	---	---	---	---	---	---	main				ACMSD
TC03001356.hg.1	---	cdna:known chromosome:GRCh37:3:46406446:46448550:-1 gene:ENSG00000223552 gene_biotype:antisense transcript_biotype:antisense | cdna:all chromosome:VEGA50:3:46406446:46448550:-1 Gene:OTTHUMG00000156326	noncoding	0.0443736	0.37	40.4	26.44	1.53	up	---	ENST00000451485	ENSEMBL // Havana transcript	cdna:known chromosome:GRCh37:3:46406446:46448550:-1 gene:ENSG00000223552 gene_biotype:antisense transcript_biotype:antisense // cdna:all chromosome:VEGA50:3:46406446:46448550:-1 Gene:OTTHUMG00000156326	chr3	-	46406446	46448550	---	---	---	---	---	---	---	---	---	---	---	---	---	---	main				CCR5
TC03002142.hg.1	ACAP2-IT1	ACAP2 intronic transcript 1 (non-protein coding)	noncoding	0.0230141	0.31	6.61	4.31	1.53	up	---	ENST00000419899	ENSEMBL // Havana transcript	havana:sense_intronic chromosome:GRCh37:3:195001452:195003470:-1 gene:ENSG00000229325 gene_biotype:sense_intronic transcript_biotype:sense_intronic // cdna:all chromosome:VEGA50:3:195001452:195003470:-1 Gene:OTTHUMG00000155905	chr3	-	195001452	195003470	---	---	---	---	---	---	---	---	---	---	---	---	---	---	main		ACAP2	XXYLT1 9556bp;
TC03002185.hg.1	LMLN-AS1	LMLN antisense RNA 1 (non-protein coding)	noncoding	0.0151316	0.278	22.58	14.73	1.53	up	---	ENST00000423460	ENSEMBL // Havana transcript	cdna:putative chromosome:GRCh37:3:197765192:197766105:-1 gene:ENSG00000232832 gene_biotype:antisense transcript_biotype:antisense // cdna:all chromosome:VEGA50:3:197765192:197766105:-1 Gene:OTTHUMG00000155374	chr3	-	197765192	197766105	---	---	---	---	---	---	---	---	---	---	---	---	---	---	main				LMLN
TC09000003.hg.1	---	cdna:putative chromosome:GRCh37:9:72701:88826:1 gene:ENSG00000225655 gene_biotype:antisense transcript_biotype:antisense | cdna:putative chromosome:GRCh37:9:72716:75298:1 gene:ENSG00000225655 gene_biotype:antisense transcript_biotype:antisense | cdna:putative chromosome:GRCh37:9:72706:75298:1 gene:ENSG00000225655 gene_biotype:antisense transcript_biotype:antisense | cdna:all chromosome:VEGA50:9:7…	noncoding	0.0121361	0.262	57.3	37.37	1.53	up	---	ENST00000429980	ENSEMBL // ENSEMBL // ENSEMBL // UCSC Genes // Havana transcript // Havana transcript // Havana transcript	cdna:putative chromosome:GRCh37:9:72701:88826:1 gene:ENSG00000225655 gene_biotype:antisense transcript_biotype:antisense // cdna:putative chromosome:GRCh37:9:72716:75298:1 gene:ENSG00000225655 gene_biotype:antisense transcript_biotype:antisense // cdna:putative chromosome:GRCh37:9:72706:75298:1 gene:ENSG00000225655 gene_biotype:antisense transcript_biotype:antisense // --- // cdna:all chromosome:…	chr9	+	72698	88826	---	---	---	---	---	---	---	---	---	---	---	---	---	---	main
TC11002330.hg.1	SIK3-IT1	SIK3 intronic transcript 1 (non-protein coding)	noncoding	0.0437671	0.369	40.07	26.12	1.53	up	---	ENST00000454832	ENSEMBL // Havana transcript	havana:sense_intronic chromosome:GRCh37:11:116756762:116761437:-1 gene:ENSG00000231865 gene_biotype:sense_intronic transcript_biotype:sense_intronic // cdna:all chromosome:VEGA50:11:116756762:116761437:-1 Gene:OTTHUMG00000066638	chr11	-	116756762	116761437	---	---	---	---	---	---	---	---	---	---	---	---	---	---	main		SIK3
TC11002851.hg.1	---	accn=U53531 class=mRNAlike lncRNA name=Human lncRNA ref=JounralRNA transcriptId=3573 cpcScore=8.0999900 cnci=-0.4865388	noncoding	0.0363569	0.352	11.95	7.8	1.53	up	---	n341107	NONCODE	accn=U53531 class=mRNAlike lncRNA name=Human lncRNA ref=JounralRNA transcriptId=3573 cpcScore=8.0999900 cnci=-0.4865388	chr11	+	103024204	103041679	---	---	---	---	---	---	---	---	---	---	---	---	---	---	main		DYNC2H1
TC01003674.hg.1	---	ncrna:miRNA chromosome:GRCh37:1:199166208:199166312:-1 gene:ENSG00000239006 gene_biotype:miRNA transcript_biotype:miRNA	noncoding	0.0257984	0.323	24.92	16.18	1.54	up	---	ENST00000410741	ENSEMBL	ncrna:miRNA chromosome:GRCh37:1:199166208:199166312:-1 gene:ENSG00000239006 gene_biotype:miRNA transcript_biotype:miRNA	chr1	-	199166208	199166312	---	---	---	---	---	---	---	---	---	---	---	---	---	---	main
TC01005416.hg.1	---	accn=NR_037632 class=lncRNA name= ref=RefGeneNoncode transcriptId=NR_037632 cpcScore=1.6640700 cnci=-0.3728634 | accn=NR_037634 class=lncRNA name= ref=RefGeneNoncode transcriptId=NR_037634 cpcScore=5.3790800 cnci=-0.3527510 | accn=NR_037635 class=lncRNA name= ref=RefGeneNoncode transcriptId=NR_037635 cpcScore=1.5300200 cnci=-0.3763723 | accn=NR_037633 class=lncRNA name= ref=RefGeneNoncode transcr…	noncoding	0.0206058	0.303	78.3	50.92	1.54	up	---	n410490	NONCODE // NONCODE // NONCODE // NONCODE	accn=NR_037632 class=lncRNA name= ref=RefGeneNoncode transcriptId=NR_037632 cpcScore=1.6640700 cnci=-0.3728634 // accn=NR_037634 class=lncRNA name= ref=RefGeneNoncode transcriptId=NR_037634 cpcScore=5.3790800 cnci=-0.3527510 // accn=NR_037635 class=lncRNA name= ref=RefGeneNoncode transcriptId=NR_037635 cpcScore=1.5300200 cnci=-0.3763723 // accn=NR_037633 class=lncRNA name= ref=RefGeneNoncode tran…	chr1	-	39328162	39347298	---	---	---	---	---	---	---	---	---	---	---	---	---	---	main	RHBDL2 4181bp;	MYCBP	RRAGC 2667bp;
TC02003239.hg.1	---	accn=NR_002229 class=lncRNA name= ref=RefGeneNoncode transcriptId=NR_002229 cpcScore=3.0421500 cnci=-0.2341175	noncoding	0.0390592	0.36	76.03	49.53	1.54	up	---	n405467	NONCODE	accn=NR_002229 class=lncRNA name= ref=RefGeneNoncode transcriptId=NR_002229 cpcScore=3.0421500 cnci=-0.2341175	chr2	+	54756359	54756978	---	---	---	---	---	---	---	---	---	---	---	---	---	---	main		SPTBN1
TC06003100.hg.1	---	accn=AL110111 class=mRNAlike lncRNA name=Human lncRNA ref=JounralRNA transcriptId=4631 cpcScore=-1.2861700 cnci=-0.3325761	noncoding	0.0033538	0.182	24.51	15.95	1.54	up	---	n342145	NONCODE	accn=AL110111 class=mRNAlike lncRNA name=Human lncRNA ref=JounralRNA transcriptId=4631 cpcScore=-1.2861700 cnci=-0.3325761	chr6	+	142635265	142635798	---	---	---	---	---	---	---	---	---	---	---	---	---	---	main		GPR126
TC06003968.hg.1	---	linc-SLC22A2 chr6:-:160887586-160932156 | linc-SLC22A2 chr6:-:160888218-160932156 | linc-SLC22A2 chr6:-:160899537-160941163 | linc-SLC22A2 chr6:-:160899544-160901219 | linc-SLC22A2 chr6:-:160905102-160908623 | linc-SLC22A2 chr6:-:160906889-160921892 | linc-SLC22A2 chr6:-:160913713-160932156 | linc-SLC22A2 chr6:-:160921637-160922375	noncoding	0.0208382	0.304	53.61	34.83	1.54	up	---	TCONS_l2_00025528-XLOC_l2_013192	Broad TUCP // Broad TUCP // Broad TUCP // Broad TUCP // Broad TUCP // Broad TUCP // Broad TUCP // Broad TUCP	linc-SLC22A2 chr6:-:160887586-160932156 // linc-SLC22A2 chr6:-:160888218-160932156 // linc-SLC22A2 chr6:-:160899537-160941163 // linc-SLC22A2 chr6:-:160899544-160901219 // linc-SLC22A2 chr6:-:160905102-160908623 // linc-SLC22A2 chr6:-:160906889-160921892 // linc-SLC22A2 chr6:-:160913713-160932156 // linc-SLC22A2 chr6:-:160921637-160922375	chr6	-	160887587	160941163	---	---	---	---	---	---	---	---	---	---	---	---	---	---	main
TC07002375.hg.1	---	linc-ZNF92-1 chr7:+:64601602-64694599 | linc-ZNF92-1 chr7:+:64610673-64649603 | linc-ZNF92-1 chr7:+:64630590-64645850 | linc-ZNF92-1 chr7:+:64639646-64646868 | linc-ZNF92-1 chr7:+:64645609-64646832 | linc-ZNF92-1 chr7:+:64649462-64693806 | linc-ZNF92-1 chr7:+:64649466-64661332 | linc-ZNF92-1 chr7:+:64660725-64694533	noncoding	0.0289789	0.334	72.18	46.87	1.54	up	---	TCONS_l2_00027131-XLOC_l2_013458	Broad TUCP // Broad TUCP // Broad TUCP // Broad TUCP // Broad TUCP // Broad TUCP // Broad TUCP // Broad TUCP	linc-ZNF92-1 chr7:+:64601602-64694599 // linc-ZNF92-1 chr7:+:64610673-64649603 // linc-ZNF92-1 chr7:+:64630590-64645850 // linc-ZNF92-1 chr7:+:64639646-64646868 // linc-ZNF92-1 chr7:+:64645609-64646832 // linc-ZNF92-1 chr7:+:64649462-64693806 // linc-ZNF92-1 chr7:+:64649466-64661332 // linc-ZNF92-1 chr7:+:64660725-64694533	chr7	+	64601603	64694599	---	---	---	---	---	---	---	---	---	---	---	---	---	---	main
TC09001979.hg.1	---	accn=NULL class=lncRNA name= ref=EnsemblNoncode transcriptId=ENST00000416011 cpcScore=-1.3097500 cnci=-0.2015473 | linc-ANKRD20A4-4 chr9:+:68810280-68811704	noncoding	0.0020618	0.155	38.94	25.31	1.54	up	---	n377906	NONCODE // Broad TUCP	accn=NULL class=lncRNA name= ref=EnsemblNoncode transcriptId=ENST00000416011 cpcScore=-1.3097500 cnci=-0.2015473 // linc-ANKRD20A4-4 chr9:+:68810280-68811704	chr9	+	68808991	68811704	---	---	---	---	---	---	---	---	---	---	---	---	---	---	main
TC13000115.hg.1	STARD13-AS2	STARD13 antisense RNA 2 (non-protein coding)	noncoding	0.0489585	0.379	16.79	10.87	1.54	up	---	ENST00000424853	ENSEMBL // Havana transcript	cdna:known chromosome:GRCh37:13:33851690:33855471:1 gene:ENSG00000236581 gene_biotype:antisense transcript_biotype:antisense // cdna:all chromosome:VEGA50:13:33851690:33855471:1 Gene:OTTHUMG00000016710	chr13	+	33851690	33855471	---	---	---	---	---	---	---	---	---	---	---	---	---	---	main				STARD13
TC15002578.hg.1	---	accn=AK021773 class=mRNAlike lncRNA name=Human lncRNA ref=JounralRNA transcriptId=249 cpcScore=4.6941600 cnci=-0.1375447	noncoding	0.0021357	0.157	23.88	15.55	1.54	up	---	n337866	NONCODE	accn=AK021773 class=mRNAlike lncRNA name=Human lncRNA ref=JounralRNA transcriptId=249 cpcScore=4.6941600 cnci=-0.1375447	chr15	-	65244342	65248504	---	---	---	---	---	---	---	---	---	---	---	---	---	---	main	SPG21 6858bp;			ANKDD1A
TC22001043.hg.1	---	accn=AK124922 class=mRNAlike lncRNA name=Human lncRNA ref=JounralRNA transcriptId=380 cpcScore=-1.0988900 cnci=-0.3249960	noncoding	0.040709	0.364	11.73	7.62	1.54	up	---	n337994	NONCODE	accn=AK124922 class=mRNAlike lncRNA name=Human lncRNA ref=JounralRNA transcriptId=380 cpcScore=-1.0988900 cnci=-0.3249960	chr22	+	26121103	26123847	---	---	---	---	---	---	---	---	---	---	---	---	---	---	main		ADRBK2
TC01003510.hg.1	---	ncrna:miRNA chromosome:GRCh37:1:171010488:171010581:-1 gene:ENSG00000215924 gene_biotype:miRNA transcript_biotype:miRNA	noncoding	0.0450874	0.372	20.16	12.99	1.55	up	---	ENST00000401105	ENSEMBL	ncrna:miRNA chromosome:GRCh37:1:171010488:171010581:-1 gene:ENSG00000215924 gene_biotype:miRNA transcript_biotype:miRNA	chr1	-	171010488	171010581	---	---	---	---	---	---	---	---	---	---	---	---	---	---	main				C1orf129
TC17002729.hg.1	---	accn=FJ648812 class=mRNAlike lncRNA name=NULL ref=H-invitational v7.5 transcriptId=HIT000558865 cpcScore=-0.9454690 cnci=-0.1147873	noncoding	0.0109969	0.254	133.53	86.16	1.55	up	---	n332331	NONCODE	accn=FJ648812 class=mRNAlike lncRNA name=NULL ref=H-invitational v7.5 transcriptId=HIT000558865 cpcScore=-0.9454690 cnci=-0.1147873	chr17	-	57232318	57232555	---	---	---	---	---	---	---	---	---	---	---	---	---	---	main		SKA2
TC03001102.hg.1	---	cdna:putative chromosome:GRCh37:3:196640757:196641313:1 gene:ENSG00000230732 gene_biotype:antisense transcript_biotype:antisense | cdna:all chromosome:VEGA50:3:196639972:196641450:1 Gene:OTTHUMG00000155528	noncoding	0.0001959	0.0941	7.06	4.53	1.56	up	---	ENST00000432047	ENSEMBL // Havana transcript	cdna:putative chromosome:GRCh37:3:196640757:196641313:1 gene:ENSG00000230732 gene_biotype:antisense transcript_biotype:antisense // cdna:all chromosome:VEGA50:3:196639972:196641450:1 Gene:OTTHUMG00000155528	chr3	+	196640757	196641313	---	---	---	---	---	---	---	---	---	---	---	---	---	---	main		SENP5
TC10001849.hg.1	---	accn=NULL class=lincRNA name=Human lincRNA ref=Scripture Reconstruction LincRNAs By Luo transcriptId=linc_luo_1959 cpcScore=-1.1798900 cnci=-0.2037429	noncoding	0.0187857	0.295	41.62	26.68	1.56	up	---	n346409	NONCODE	accn=NULL class=lincRNA name=Human lincRNA ref=Scripture Reconstruction LincRNAs By Luo transcriptId=linc_luo_1959 cpcScore=-1.1798900 cnci=-0.2037429	chr10	+	4713568	4719099	---	---	---	---	---	---	---	---	---	---	---	---	---	---	main
TC13001338.hg.1	---	accn=NULL class=lincRNA name=Human lincRNA ref=Scripture Reconstruction LincRNAs By Luo transcriptId=linc_luo_1704 cpcScore=-1.3150500 cnci=-0.3679187	noncoding	0.0375105	0.355	11.86	7.62	1.56	up	---	n346154	NONCODE	accn=NULL class=lincRNA name=Human lincRNA ref=Scripture Reconstruction LincRNAs By Luo transcriptId=linc_luo_1704 cpcScore=-1.3150500 cnci=-0.3679187	chr13	-	20133178	20142960	---	---	---	---	---	---	---	---	---	---	---	---	---	---	main		TPTE2
TC14001195.hg.1	---	havana:lincRNA chromosome:GRCh37:14:62023038:62037371:-1 gene:ENSG00000250548 gene_biotype:lincRNA transcript_biotype:lincRNA | havana:lincRNA chromosome:GRCh37:14:62023031:62036912:-1 gene:ENSG00000250548 gene_biotype:lincRNA transcript_biotype:lincRNA	noncoding	0.0162217	0.282	17.32	11.1	1.56	up	---	ENST00000508827	ENSEMBL // ENSEMBL	havana:lincRNA chromosome:GRCh37:14:62023038:62037371:-1 gene:ENSG00000250548 gene_biotype:lincRNA transcript_biotype:lincRNA // havana:lincRNA chromosome:GRCh37:14:62023031:62036912:-1 gene:ENSG00000250548 gene_biotype:lincRNA transcript_biotype:lincRNA	chr14	-	62023031	62037371	---	---	---	---	---	---	---	---	---	---	---	---	---	---	main				PRKCH
TC17002062.hg.1	---	accn=NULL class=mRNAlike lncRNA name=vega lncRNA ref=GENCODE transcriptId=OTTHUMT00000130000 cpcScore=-0.1561370 cnci=-0.2016901	noncoding	0.0424997	0.367	25.36	16.26	1.56	up	---	n325572	NONCODE	accn=NULL class=mRNAlike lncRNA name=vega lncRNA ref=GENCODE transcriptId=OTTHUMT00000130000 cpcScore=-0.1561370 cnci=-0.2016901	chr17	+	14218181	14265068	---	---	---	---	---	---	---	---	---	---	---	---	---	---	main		HS3ST3B1
TC20000952.hg.1	---	ncrna:miRNA chromosome:GRCh37:20:51629206:51629286:-1 gene:ENSG00000221140 gene_biotype:miRNA transcript_biotype:miRNA	noncoding	0.0400393	0.362	17.96	11.5	1.56	up	---	ENST00000408213	ENSEMBL	ncrna:miRNA chromosome:GRCh37:20:51629206:51629286:-1 gene:ENSG00000221140 gene_biotype:miRNA transcript_biotype:miRNA	chr20	-	51629206	51629286	---	---	---	---	---	---	---	---	---	---	---	---	---	---	main				TSHZ2
TC01000855.hg.1	---	ncrna:snoRNA chromosome:GRCh37:1:93303575:93303627:1 gene:ENSG00000251795 gene_biotype:snoRNA transcript_biotype:snoRNA	noncoding	0.007674	0.229	134.86	85.71	1.57	up	---	ENST00000515986	ENSEMBL // UCSC Genes	ncrna:snoRNA chromosome:GRCh37:1:93303575:93303627:1 gene:ENSG00000251795 gene_biotype:snoRNA transcript_biotype:snoRNA // ---	chr1	+	93303575	93303627	---	---	---	---	---	---	---	---	---	---	---	---	---	---	main				FAM69A
TC01005451.hg.1	---	accn=NR_045030 class=lncRNA name= ref=RefGeneNoncode transcriptId=NR_045030 cpcScore=4.7978800 cnci=-0.3320956	noncoding	0.0108942	0.253	77.07	49.1	1.57	up	---	n411744	NONCODE	accn=NR_045030 class=lncRNA name= ref=RefGeneNoncode transcriptId=NR_045030 cpcScore=4.7978800 cnci=-0.3320956	chr1	-	47100711	47131550	---	---	---	---	---	---	---	---	---	---	---	---	---	---	main	KIAA0494 9281bp;	ATPAF1
TC02003327.hg.1	---	accn=NR_029403 class=lncRNA name= ref=RefGeneNoncode transcriptId=NR_029403 cpcScore=8.9296700 cnci=-0.1443359 | accn=NR_029402 class=lncRNA name= ref=RefGeneNoncode transcriptId=NR_029402 cpcScore=10.7881000 cnci=-0.1584271	noncoding	0.0048706	0.202	1679.79	1067.65	1.57	up	---	n408334	NONCODE // NONCODE	accn=NR_029403 class=lncRNA name= ref=RefGeneNoncode transcriptId=NR_029403 cpcScore=8.9296700 cnci=-0.1443359 // accn=NR_029402 class=lncRNA name= ref=RefGeneNoncode transcriptId=NR_029402 cpcScore=10.7881000 cnci=-0.1584271	chr2	+	73461364	73480150	---	---	---	---	---	---	---	---	---	---	---	---	---	---	main	SMYD5 6999bp;	CCT7
TC05002404.hg.1	---	accn=NR_003545 class=lncRNA name= ref=RefGeneNoncode transcriptId=NR_003545 cpcScore=3.8022600 cnci=-0.4614632	noncoding	0.00712	0.225	23.91	15.19	1.57	up	---	n406134	NONCODE	accn=NR_003545 class=lncRNA name= ref=RefGeneNoncode transcriptId=NR_003545 cpcScore=3.8022600 cnci=-0.4614632	chr5	+	64920558	64926532	---	---	---	---	---	---	---	---	---	---	---	---	---	---	main		C5orf44		TRIM23
TC09002496.hg.1	---	accn=NULL class=lncRNA name= ref=UCSCGeneNoncode transcriptId=uc004abd.1 cpcScore=1.9204600 cnci=-0.2513759	noncoding	0.0387659	0.359	20.63	13.17	1.57	up	---	n385519	NONCODE	accn=NULL class=lncRNA name= ref=UCSCGeneNoncode transcriptId=uc004abd.1 cpcScore=1.9204600 cnci=-0.2513759	chr9	-	38566270	38567982	---	---	---	---	---	---	---	---	---	---	---	---	---	---	main		ANKRD18A
TC11002168.hg.1	OR7E2P	olfactory receptor, family 7, subfamily E, member 2 pseudogene	noncoding	0.0083905	0.234	25.1	15.95	1.57	up	11q14.2	NR_045004	RefSeq // UCSC Genes	Homo sapiens olfactory receptor, family 7, subfamily E, member 2 pseudogene (OR7E2P), non-coding RNA. // ---	chr11	-	86567973	86568996	---	---	---	---	---	---	---	---	---	---	---	---	---	---	main				PRSS23
TC12002221.hg.1	---	accn=NULL class=lncRNA name= ref=UCSCGeneNoncode transcriptId=uc009zgg.1 cpcScore=-1.1177000 cnci=-0.3598356 | accn=NULL class=lncRNA name= ref=UCSCGeneNoncode transcriptId=uc001quy.2 cpcScore=-1.1323600 cnci=-0.3033635	noncoding	0.0470269	0.375	18.18	11.58	1.57	up	---	n386034	NONCODE // NONCODE	accn=NULL class=lncRNA name= ref=UCSCGeneNoncode transcriptId=uc009zgg.1 cpcScore=-1.1177000 cnci=-0.3598356 // accn=NULL class=lncRNA name= ref=UCSCGeneNoncode transcriptId=uc001quy.2 cpcScore=-1.1323600 cnci=-0.3033635	chr12	+	8931627	8935685	---	---	---	---	---	---	---	---	---	---	---	---	---	---	main		RIMKLB
TC19002414.hg.1	---	accn=NULL class=lincRNA name=Human lincRNA ref=Scripture Reconstruction LincRNAs By Luo transcriptId=linc_luo_1438 cpcScore=-1.3196500 cnci=-0.2875617 | accn=NULL class=lncRNA name= ref=UCSCGeneNoncode transcriptId=uc002nrf.2 cpcScore=0.1197310 cnci=-0.2635363 | accn=NULL class=lncRNA name= ref=EnsemblNoncode transcriptId=ENST00000501220 cpcScore=0.0848369 cnci=-0.2383409 | accn=NULL class=lncRNA…	noncoding	0.0305323	0.337	110.73	70.3	1.57	up	---	n345889	NONCODE // NONCODE // NONCODE // NONCODE // Broad TUCP // Broad TUCP // Broad TUCP	accn=NULL class=lincRNA name=Human lincRNA ref=Scripture Reconstruction LincRNAs By Luo transcriptId=linc_luo_1438 cpcScore=-1.3196500 cnci=-0.2875617 // accn=NULL class=lncRNA name= ref=UCSCGeneNoncode transcriptId=uc002nrf.2 cpcScore=0.1197310 cnci=-0.2635363 // accn=NULL class=lncRNA name= ref=EnsemblNoncode transcriptId=ENST00000501220 cpcScore=0.0848369 cnci=-0.2383409 // accn=NULL class=lnc…	chr19	-	23581791	23598903	---	---	---	---	---	---	---	---	---	---	---	---	---	---	main			ZNF91 3522bp;
TC20000697.hg.1	LINC00261	long intergenic non-protein coding RNA 261	noncoding	0.0207941	0.304	25.68	16.36	1.57	up	20p11.21	NR_001558	RefSeq // ENSEMBL // UCSC Genes // Havana transcript	Homo sapiens long intergenic non-protein coding RNA 261 (LINC00261), non-coding RNA. // cdna:known chromosome:GRCh37:20:22541191:22559280:-1 gene:ENSG00000225074 // --- // cdna:all chromosome:VEGA50:20:22541191:22559280:-1 Gene:OTTHUMG00000046240	chr20	-	22541191	22559280	---	---	---	---	---	---	---	---	---	---	---	---	---	---	main	FOXA2 2362bp;
TC01005391.hg.1	---	accn=AY099493 class=mRNAlike lncRNA name=NULL ref=H-invitational v7.5 transcriptId=HIT000084412 cpcScore=0.2897410 cnci=-0.3008765	noncoding	0.0224307	0.308	146.98	93.03	1.58	up	---	n333294	NONCODE	accn=AY099493 class=mRNAlike lncRNA name=NULL ref=H-invitational v7.5 transcriptId=HIT000084412 cpcScore=0.2897410 cnci=-0.3008765	chr1	-	33099646	33116185	---	---	---	---	---	---	---	---	---	---	---	---	---	---	main		ZBTB8OS
TC02003334.hg.1	---	linc-MTHFD2 chr2:+:74378364-74381319	noncoding	0.0207512	0.303	21.91	13.91	1.58	up	---	TCONS_00002935-XLOC_001532	Rinn lincRNAs	linc-MTHFD2 chr2:+:74378364-74381319	chr2	+	74378365	74381319	---	---	---	---	---	---	---	---	---	---	---	---	---	---	main				MOB1A
TC03001980.hg.1	---	havana:sense_intronic chromosome:GRCh37:3:169331298:169341739:-1 gene:ENSG00000242795 gene_biotype:sense_intronic transcript_biotype:sense_intronic | cdna:all chromosome:VEGA50:3:169331298:169341739:-1 Gene:OTTHUMG00000158688	noncoding	0.0001548	0.0937	22.23	14.06	1.58	up	---	ENST00000469794	ENSEMBL // Havana transcript	havana:sense_intronic chromosome:GRCh37:3:169331298:169341739:-1 gene:ENSG00000242795 gene_biotype:sense_intronic transcript_biotype:sense_intronic // cdna:all chromosome:VEGA50:3:169331298:169341739:-1 Gene:OTTHUMG00000158688	chr3	-	169331298	169341739	---	---	---	---	---	---	---	---	---	---	---	---	---	---	main		MECOM
TC07000323.hg.1	---	ncrna:snoRNA chromosome:GRCh37:7:54427585:54427688:1 gene:ENSG00000238354 gene_biotype:snoRNA transcript_biotype:snoRNA	noncoding	0.0229176	0.309	23.4	14.82	1.58	up	---	ENST00000459440	ENSEMBL	ncrna:snoRNA chromosome:GRCh37:7:54427585:54427688:1 gene:ENSG00000238354 gene_biotype:snoRNA transcript_biotype:snoRNA	chr7	+	54427585	54427688	---	---	---	---	---	---	---	---	---	---	---	---	---	---	main
TC08001555.hg.1	---	cdna:known chromosome:GRCh37:8:120432150:120474590:-1 gene:ENSG00000253398 gene_biotype:antisense transcript_biotype:antisense | cdna:all chromosome:VEGA50:8:120432150:120474590:-1 Gene:OTTHUMG00000164985	noncoding	0.0282313	0.331	11.57	7.32	1.58	up	---	ENST00000519786	ENSEMBL // Havana transcript	cdna:known chromosome:GRCh37:8:120432150:120474590:-1 gene:ENSG00000253398 gene_biotype:antisense transcript_biotype:antisense // cdna:all chromosome:VEGA50:8:120432150:120474590:-1 Gene:OTTHUMG00000164985	chr8	-	120432150	120474590	---	---	---	---	---	---	---	---	---	---	---	---	---	---	main				NOV
TC08002502.hg.1	---	accn=NR_037873 class=lncRNA name= ref=RefGeneNoncode transcriptId=NR_037873 cpcScore=11.7431000 cnci=-0.4152945 | accn=NR_037874 class=lncRNA name= ref=RefGeneNoncode transcriptId=NR_037874 cpcScore=-1.1268000 cnci=-0.4145711	noncoding	0.0188841	0.295	70.97	44.91	1.58	up	---	n410632	NONCODE // NONCODE	accn=NR_037873 class=lncRNA name= ref=RefGeneNoncode transcriptId=NR_037873 cpcScore=11.7431000 cnci=-0.4152945 // accn=NR_037874 class=lncRNA name= ref=RefGeneNoncode transcriptId=NR_037874 cpcScore=-1.1268000 cnci=-0.4145711	chr8	-	124260690	124287781	---	---	---	---	---	---	---	---	---	---	---	---	---	---	main		ZHX1	C8orf76 7052bp;
TC09002021.hg.1	---	accn=AY196293 class=mRNAlike lncRNA name=Human lncRNA ref=JounralRNA transcriptId=4175 cpcScore=-1.1631000 cnci=-0.3315279	noncoding	0.0374225	0.355	177.25	111.91	1.58	up	---	n341703	NONCODE	accn=AY196293 class=mRNAlike lncRNA name=Human lncRNA ref=JounralRNA transcriptId=4175 cpcScore=-1.1631000 cnci=-0.3315279	chr9	+	79056582	79117213	---	---	---	---	---	---	---	---	---	---	---	---	---	---	main		GCNT1
TC11003224.hg.1	---	accn=NULL class=lncRNA name= ref=UCSCGeneNoncode transcriptId=uc001onl.1 cpcScore=0.1819610 cnci=-0.2815529	noncoding	0.0413981	0.365	39.32	24.9	1.58	up	---	n381730	NONCODE	accn=NULL class=lncRNA name= ref=UCSCGeneNoncode transcriptId=uc001onl.1 cpcScore=0.1819610 cnci=-0.2815529	chr11	-	67826217	67828536	---	---	---	---	---	---	---	---	---	---	---	---	---	---	main		CHKA
TC02004338.hg.1	---	accn=NULL class=lincRNA name=Human lincRNA ref=Scripture Reconstruction LincRNAs By Luo transcriptId=linc_luo_1081 cpcScore=-1.6575200 cnci=-0.3205601	noncoding	0.0027342	0.168	57.62	36.24	1.59	up	---	n345532	NONCODE	accn=NULL class=lincRNA name=Human lincRNA ref=Scripture Reconstruction LincRNAs By Luo transcriptId=linc_luo_1081 cpcScore=-1.6575200 cnci=-0.3205601	chr2	-	74208236	74208568	---	---	---	---	---	---	---	---	---	---	---	---	---	---	main
TC03002312.hg.1	---	linc-C3orf77 chr3:+:44040885-44059829	noncoding	0.011091	0.255	127.26	80.29	1.59	up	---	TCONS_00006002-XLOC_002629	Rinn lincRNAs	linc-C3orf77 chr3:+:44040885-44059829	chr3	+	44040886	44059829	---	---	---	---	---	---	---	---	---	---	---	---	---	---	main
TC04001433.hg.1	---	ncrna:snoRNA chromosome:GRCh37:4:103780550:103780653:-1 gene:ENSG00000238948 gene_biotype:snoRNA transcript_biotype:snoRNA	noncoding	0.0057914	0.212	26.08	16.44	1.59	up	---	ENST00000458860	ENSEMBL	ncrna:snoRNA chromosome:GRCh37:4:103780550:103780653:-1 gene:ENSG00000238948 gene_biotype:snoRNA transcript_biotype:snoRNA	chr4	-	103780550	103780653	---	---	---	---	---	---	---	---	---	---	---	---	---	---	main		UBE2D3
TC09001920.hg.1	---	linc-FAM75A3-2 chr9:+:40308215-40322860 | linc-FAM75A3-2 chr9:+:40308742-40324812	noncoding	0.0034862	0.183	16.99	10.71	1.59	up	---	TCONS_l2_00028738-XLOC_l2_014777	Broad TUCP // Broad TUCP	linc-FAM75A3-2 chr9:+:40308215-40322860 // linc-FAM75A3-2 chr9:+:40308742-40324812	chr9	+	40308216	40324812	---	---	---	---	---	---	---	---	---	---	---	---	---	---	main
TC19001260.hg.1	---	ncrna:lincRNA chromosome:GRCh37:19:15940172:15946228:-1 gene:ENSG00000250388	noncoding	0.0042054	0.193	45.39	28.51	1.59	up	---	ENST00000509303	ENSEMBL	ncrna:lincRNA chromosome:GRCh37:19:15940172:15946228:-1 gene:ENSG00000250388	chr19	-	15940172	15946228	---	---	---	---	---	---	---	---	---	---	---	---	---	---	main
TC02003815.hg.1	---	accn=NULL class=lincRNA name=Human lincRNA ref=Scripture Reconstruction LincRNAs By Luo transcriptId=linc_luo_1117 cpcScore=-1.3257300 cnci=-0.2942127 | accn=NULL class=lncRNA name= ref=UCSCGeneNoncode transcriptId=uc002vga.1 cpcScore=-0.9840220 cnci=-0.3625708 | linc-SMARCAL1-2 chr2:+:217074539-217084905	noncoding	0.0056287	0.211	40.96	25.66	1.6	up	---	n345568	NONCODE // NONCODE // Rinn lincRNAs	accn=NULL class=lincRNA name=Human lincRNA ref=Scripture Reconstruction LincRNAs By Luo transcriptId=linc_luo_1117 cpcScore=-1.3257300 cnci=-0.2942127 // accn=NULL class=lncRNA name= ref=UCSCGeneNoncode transcriptId=uc002vga.1 cpcScore=-0.9840220 cnci=-0.3625708 // linc-SMARCAL1-2 chr2:+:217074539-217084905	chr2	+	217074540	217084905	---	---	---	---	---	---	---	---	---	---	---	---	---	---	main	XRCC5 3514bp;
TC02003794.hg.1	---	linc-MAP2 chr2:+:210045260-210045746	noncoding	0.0425207	0.367	41.62	25.8	1.61	up	---	TCONS_l2_00014214-XLOC_l2_007734	Broad TUCP	linc-MAP2 chr2:+:210045260-210045746	chr2	+	210045261	210045746	---	---	---	---	---	---	---	---	---	---	---	---	---	---	main
TC08001639.hg.1	---	ncrna:snoRNA chromosome:GRCh37:8:130880836:130880962:-1 gene:ENSG00000200075 gene_biotype:snoRNA transcript_biotype:snoRNA	noncoding	0.0390902	0.36	16.24	10.11	1.61	up	---	ENST00000363205	ENSEMBL // UCSC Genes	ncrna:snoRNA chromosome:GRCh37:8:130880836:130880962:-1 gene:ENSG00000200075 gene_biotype:snoRNA transcript_biotype:snoRNA // ---	chr8	-	130880836	130880962	---	---	---	---	---	---	---	---	---	---	---	---	---	---	main		FAM49B
TC13001589.hg.1	---	accn=BC031557 class=mRNAlike lncRNA name=Human lncRNA ref=JounralRNA transcriptId=4685 cpcScore=-0.9846520 cnci=-0.2809052	noncoding	0.0199653	0.3	16.06	9.99	1.61	up	---	n342195	NONCODE	accn=BC031557 class=mRNAlike lncRNA name=Human lncRNA ref=JounralRNA transcriptId=4685 cpcScore=-0.9846520 cnci=-0.2809052	chr13	-	79205516	79207056	---	---	---	---	---	---	---	---	---	---	---	---	---	---	main		RNF219
TC08002043.hg.1	---	accn=NR_002182 class=lncRNA name= ref=RefGeneNoncode transcriptId=NR_002182 cpcScore=3.9867900 cnci=-0.3161323	noncoding	0.0488201	0.379	123.63	76.44	1.62	up	---	n405438	NONCODE	accn=NR_002182 class=lncRNA name= ref=RefGeneNoncode transcriptId=NR_002182 cpcScore=3.9867900 cnci=-0.3161323	chr8	+	102381121	102381823	---	---	---	---	---	---	---	---	---	---	---	---	---	---	main
TC09000642.hg.1	MIR181B2	microRNA 181b-2	noncoding	0.0240093	0.315	19.13	11.81	1.62	up	9q33.3	NR_029782	RefSeq // ENSEMBL // UCSC Genes	Homo sapiens microRNA 181b-2 (MIR181B2), microRNA. // ncrna:miRNA chromosome:GRCh37:9:127455989:127456077:1 gene:ENSG00000207737 gene_biotype:miRNA transcript_biotype:miRNA // ---	chr9	+	127455989	127456077	---	---	---	---	---	---	---	---	---	---	---	---	---	---	main				NR6A1
TC09001184.hg.1	PGM5-AS1	PGM5 antisense RNA 1 (non-protein coding)	noncoding	0.0078822	0.231	61.28	37.89	1.62	up	9q13	NR_015423	RefSeq // ENSEMBL // UCSC Genes // Havana transcript // Havana transcript	Homo sapiens PGM5 antisense RNA 1 (non-protein coding) (PGM5-AS1), non-coding RNA. // ensembl_havana_lincrna:lincRNA chromosome:GRCh37:9:70970105:70972736:-1 gene:ENSG00000224958 gene_biotype:lincRNA transcript_biotype:processed_transcript // --- // cdna:all chromosome:VEGA50:9:70970105:70972736:-1 Gene:OTTHUMG00000019962 // cdna:all chromosome:VEGA50:9:70970105:70972768:-1 Gene:OTTHUMG00000019962	chr9	-	70970105	70972768	---	---	---	---	---	---	---	---	---	---	---	---	---	---	main				PGM5
TC10001746.hg.1	---	havana:lincRNA chromosome:GRCh37:10:128102438:128110448:-1 gene:ENSG00000235180 gene_biotype:lincRNA transcript_biotype:lincRNA | cdna:all chromosome:VEGA50:10:128102438:128110448:-1 Gene:OTTHUMG00000019244	noncoding	0.040095	0.362	41.58	25.68	1.62	up	---	ENST00000456514	ENSEMBL // Havana transcript	havana:lincRNA chromosome:GRCh37:10:128102438:128110448:-1 gene:ENSG00000235180 gene_biotype:lincRNA transcript_biotype:lincRNA // cdna:all chromosome:VEGA50:10:128102438:128110448:-1 Gene:OTTHUMG00000019244	chr10	-	128102438	128110448	---	---	---	---	---	---	---	---	---	---	---	---	---	---	main	C10orf90 3118bp;
TC11002669.hg.1	---	accn=NULL class=lncRNA name= ref=UCSCGeneNoncode transcriptId=uc001nhg.1 cpcScore=1.3670500 cnci=-0.3582192 | accn=NULL class=lncRNA name= ref=UCSCGeneNoncode transcriptId=uc001nhf.1 cpcScore=1.7153500 cnci=-0.3292237 | accn=NULL class=lncRNA name= ref=UCSCGeneNoncode transcriptId=uc001nhe.2 cpcScore=2.2444000 cnci=-0.2475329 | accn=NULL class=lncRNA name= ref=UCSCGeneNoncode transcriptId=uc001nh…	noncoding	0.0424266	0.367	12.75	7.87	1.62	up	---	n381691	NONCODE // NONCODE // NONCODE // NONCODE // NONCODE	accn=NULL class=lncRNA name= ref=UCSCGeneNoncode transcriptId=uc001nhg.1 cpcScore=1.3670500 cnci=-0.3582192 // accn=NULL class=lncRNA name= ref=UCSCGeneNoncode transcriptId=uc001nhf.1 cpcScore=1.7153500 cnci=-0.3292237 // accn=NULL class=lncRNA name= ref=UCSCGeneNoncode transcriptId=uc001nhe.2 cpcScore=2.2444000 cnci=-0.2475329 // accn=NULL class=lncRNA name= ref=UCSCGeneNoncode transcriptId=uc00…	chr11	+	50368318	50379803	---	---	---	---	---	---	---	---	---	---	---	---	---	---	main
TC03002180.hg.1	LOC220729	succinate dehydrogenase complex, subunit A, flavoprotein (Fp) pseudogene	noncoding	0.0094059	0.242	301.4	185.16	1.63	up	3q29	NR_003266	RefSeq // ENSEMBL // UCSC Genes // UCSC Genes // UCSC Genes	Homo sapiens succinate dehydrogenase complex, subunit A, flavoprotein (Fp) pseudogene (LOC220729), non-coding RNA. // cdna:known chromosome:GRCh37:3:197340898:197354777:-1 gene:ENSG00000214135 gene_biotype:pseudogene transcript_biotype:processed_transcript // --- // --- // ---	chr3	-	197319986	197354777	---	---	---	---	---	---	---	---	---	---	---	---	---	---	main
TC06002347.hg.1	---	accn=NULL class=mRNAlike lncRNA name=vega lncRNA ref=GENCODE transcriptId=OTTHUMT00000039619 cpcScore=3.6937200 cnci=-0.2990127	noncoding	0.039887	0.362	7.15	4.38	1.63	up	---	n324623	NONCODE	accn=NULL class=mRNAlike lncRNA name=vega lncRNA ref=GENCODE transcriptId=OTTHUMT00000039619 cpcScore=3.6937200 cnci=-0.2990127	chr6	+	100135	101639	---	---	---	---	---	---	---	---	---	---	---	---	---	---	main
TC08002328.hg.1	---	accn=CR624430 class=mRNAlike lncRNA name=Human lncRNA ref=JounralRNA transcriptId=3971 cpcScore=-0.8449390 cnci=-0.2131786	noncoding	0.0161301	0.282	60.57	37.07	1.63	up	---	n341501	NONCODE	accn=CR624430 class=mRNAlike lncRNA name=Human lncRNA ref=JounralRNA transcriptId=3971 cpcScore=-0.8449390 cnci=-0.2131786	chr8	-	54426636	54427601	---	---	---	---	---	---	---	---	---	---	---	---	---	---	main	LOC100507516 130bp;
TC19001368.hg.1	---	ncrna:lincRNA chromosome:GRCh37:19:23582041:23598873:-1 gene:ENSG00000246181 | ncrna:lincRNA chromosome:GRCh37:19:23582272:23590900:-1 gene:ENSG00000246181	noncoding	0.0484784	0.378	114.81	70.29	1.63	up	---	ENST00000499882	ENSEMBL // ENSEMBL // UCSC Genes // UCSC Genes // UCSC Genes	ncrna:lincRNA chromosome:GRCh37:19:23582041:23598873:-1 gene:ENSG00000246181 // ncrna:lincRNA chromosome:GRCh37:19:23582272:23590900:-1 gene:ENSG00000246181 // --- // --- // ---	chr19	-	23582036	23598873	---	---	---	---	---	---	---	---	---	---	---	---	---	---	main			ZNF91 3767bp;
TC03003286.hg.1	---	accn=NULL class=lncRNA name= ref=UCSCGeneNoncode transcriptId=uc011bsz.1 cpcScore=-1.0351300 cnci=-0.2207574	noncoding	0.0099624	0.246	23.93	14.59	1.64	up	---	n387297	NONCODE	accn=NULL class=lncRNA name= ref=UCSCGeneNoncode transcriptId=uc011bsz.1 cpcScore=-1.0351300 cnci=-0.2207574	chr3	-	195372409	195373178	---	---	---	---	---	---	---	---	---	---	---	---	---	---	main				MUC20
TC06002261.hg.1	SRP72P2	signal recognition particle 72kDa pseudogene 2	noncoding	0.0390105	0.36	59.95	36.47	1.64	up	---	ENST00000538672	ENSEMBL	cdna:known chromosome:GRCh37:6:158658368:158658949:-1 gene:ENSG00000188451 gene_biotype:pseudogene transcript_biotype:retrotransposed	chr6	-	158658368	158658949	---	---	---	---	---	---	---	---	---	---	---	---	---	---	main
TC07000391.hg.1	INTS4L1	integrator complex subunit 4-like 1	noncoding	0.0265542	0.326	97	59.01	1.64	up	7q11.21	NR_027393	RefSeq // UCSC Genes	Homo sapiens integrator complex subunit 4-like 1 (INTS4L1), non-coding RNA. // ---	chr7	+	64601603	64694600	---	---	---	---	---	---	GO:0005488	binding	inferred from electronic annotation	---	---	---	---	---	main
TC0X001965.hg.1	---	linc-PRKX-5 chrX:-:5224213-5225116	noncoding	0.0319846	0.34	124.75	76.02	1.64	up	---	TCONS_l2_00030436-XLOC_l2_015672	Broad TUCP	linc-PRKX-5 chrX:-:5224213-5225116	chrX	-	5224214	5225116	---	---	---	---	---	---	---	---	---	---	---	---	---	---	main
TC10002919.hg.1	---	accn=NULL class=lincRNA name=Human lincRNA ref=Scripture Reconstruction LincRNAs By Luo transcriptId=linc_luo_1386 cpcScore=-1.4896900 cnci=-0.2016896 | linc-C10orf93-1 chr10:-:134824439-134825072 | linc-C10orf93-1 chr10:-:134824448-134825220 | linc-C10orf93-1 chr10:-:134824460-134825301 | linc-C10orf93-1 chr10:-:134824705-134825301 | linc-C10orf93-1 chr10:-:134824705-134825301 | linc-C10orf93-1 …	noncoding	0.0278359	0.329	112.64	68.53	1.64	up	---	n345837	NONCODE // Rinn lincRNAs // Rinn lincRNAs // Rinn lincRNAs // Rinn lincRNAs // Rinn lincRNAs // Rinn lincRNAs // Rinn lincRNAs	accn=NULL class=lincRNA name=Human lincRNA ref=Scripture Reconstruction LincRNAs By Luo transcriptId=linc_luo_1386 cpcScore=-1.4896900 cnci=-0.2016896 // linc-C10orf93-1 chr10:-:134824439-134825072 // linc-C10orf93-1 chr10:-:134824448-134825220 // linc-C10orf93-1 chr10:-:134824460-134825301 // linc-C10orf93-1 chr10:-:134824705-134825301 // linc-C10orf93-1 chr10:-:134824705-134825301 // linc-C10or…	chr10	-	134824210	134825535	---	---	---	---	---	---	---	---	---	---	---	---	---	---	main
TC01004774.hg.1	---	accn=NULL class=lncRNA name= ref=UCSCGeneNoncode transcriptId=uc001fqs.2 cpcScore=2.1485000 cnci=-0.0959974	noncoding	0.0165671	0.285	56.65	34.44	1.65	up	---	n381262	NONCODE	accn=NULL class=lncRNA name= ref=UCSCGeneNoncode transcriptId=uc001fqs.2 cpcScore=2.1485000 cnci=-0.0959974	chr1	+	157098154	157098461	---	---	---	---	---	---	---	---	---	---	---	---	---	---	main				ETV3
TC02000182.hg.1	MIR4263	microRNA 4263	noncoding	0.0043657	0.194	29.24	17.72	1.65	up	---	NR_036230	RefSeq // UCSC Genes	Homo sapiens microRNA 4263 (MIR4263), microRNA. // ---	chr2	+	28219234	28219316	---	---	---	---	---	---	---	---	---	---	---	---	---	---	main		BRE
TC03002401.hg.1	---	accn=NULL class=lncRNA name= ref=UCSCGeneNoncode transcriptId=uc003dpu.2 cpcScore=-1.0269000 cnci=-0.2249665 | accn=NULL class=lncRNA name= ref=EnsemblNoncode transcriptId=ENST00000463183 cpcScore=1.0945400 cnci=-0.1696613 | linc-ROBO2 chr3:+:75721314-75725140 | linc-ROBO2 chr3:+:75721341-75725726 | linc-ROBO2 chr3:+:75721415-75723136 | linc-ROBO2 chr3:+:75721423-75728453 | linc-ROBO2 chr3:+:7572…	noncoding	1.15e-05	0.0388	39.33	23.65	1.66	up	---	n384275	NONCODE // NONCODE // Broad TUCP // Broad TUCP // Broad TUCP // Broad TUCP // Broad TUCP // Broad TUCP // Broad TUCP	accn=NULL class=lncRNA name= ref=UCSCGeneNoncode transcriptId=uc003dpu.2 cpcScore=-1.0269000 cnci=-0.2249665 // accn=NULL class=lncRNA name= ref=EnsemblNoncode transcriptId=ENST00000463183 cpcScore=1.0945400 cnci=-0.1696613 // linc-ROBO2 chr3:+:75721314-75725140 // linc-ROBO2 chr3:+:75721341-75725726 // linc-ROBO2 chr3:+:75721415-75723136 // linc-ROBO2 chr3:+:75721423-75728453 // linc-ROBO2 chr3:…	chr3	+	75721315	75729661	---	---	---	---	---	---	---	---	---	---	---	---	---	---	main	FRG2C 4944bp;
TC06002832.hg.1	---	accn=NULL class=lncRNA name= ref=UCSCGeneNoncode transcriptId=uc003paw.3 cpcScore=0.5399810 cnci=-0.3087655 | accn=NULL class=lincRNA name=Human lincRNA ref=Scripture Reconstruction LincRNAs By Luo transcriptId=linc_luo_1717 cpcScore=-1.7010200 cnci=-0.3001446 | linc-TMEM14A-1 chr6:+:52529198-52533951 | linc-TMEM14A-1 chr6:+:52531186-52533938	noncoding	0.0206715	0.303	69.94	42.14	1.66	up	---	n384950	NONCODE // NONCODE // Rinn lincRNAs // Rinn lincRNAs	accn=NULL class=lncRNA name= ref=UCSCGeneNoncode transcriptId=uc003paw.3 cpcScore=0.5399810 cnci=-0.3087655 // accn=NULL class=lincRNA name=Human lincRNA ref=Scripture Reconstruction LincRNAs By Luo transcriptId=linc_luo_1717 cpcScore=-1.7010200 cnci=-0.3001446 // linc-TMEM14A-1 chr6:+:52529198-52533951 // linc-TMEM14A-1 chr6:+:52531186-52533938	chr6	+	52529199	52533951	---	---	---	---	---	---	---	---	---	---	---	---	---	---	main			TMEM14A 1933bp;
TC10002263.hg.1	---	accn=NR_037644 class=lncRNA name= ref=RefGeneNoncode transcriptId=NR_037644 cpcScore=3.9243400 cnci=-0.2262030	noncoding	0.0249083	0.319	48.09	28.97	1.66	up	---	n410502	NONCODE	accn=NR_037644 class=lncRNA name= ref=RefGeneNoncode transcriptId=NR_037644 cpcScore=3.9243400 cnci=-0.2262030	chr10	+	104613967	104661655	---	---	---	---	---	---	---	---	---	---	---	---	---	---	main		AS3MT C10orf32
TC11003274.hg.1	---	accn=AL359570 class=mRNAlike lncRNA name=Human lncRNA ref=JounralRNA transcriptId=5279 cpcScore=-0.2669100 cnci=-0.3302687 | accn=NULL class=lncRNA name= ref=EnsemblNoncode transcriptId=ENST00000528524 cpcScore=-1.3149200 cnci=-0.2057930 | accn=NULL class=lncRNA name= ref=EnsemblNoncode transcriptId=ENST00000530825 cpcScore=-1.3922600 cnci=-0.3151225 | accn=NULL class=lncRNA name= ref=EnsemblNonc…	noncoding	0.0293937	0.335	47.16	28.37	1.66	up	---	n342776	NONCODE // NONCODE // NONCODE // NONCODE // NONCODE // NONCODE // NONCODE // NONCODE	accn=AL359570 class=mRNAlike lncRNA name=Human lncRNA ref=JounralRNA transcriptId=5279 cpcScore=-0.2669100 cnci=-0.3302687 // accn=NULL class=lncRNA name= ref=EnsemblNoncode transcriptId=ENST00000528524 cpcScore=-1.3149200 cnci=-0.2057930 // accn=NULL class=lncRNA name= ref=EnsemblNoncode transcriptId=ENST00000530825 cpcScore=-1.3922600 cnci=-0.3151225 // accn=NULL class=lncRNA name= ref=EnsemblN…	chr11	-	82901962	82904836	---	---	---	---	---	---	---	---	---	---	---	---	---	---	main		LOC100506282		ANKRD42
TC05002689.hg.1	---	accn=AK024346 class=mRNAlike lncRNA name=Human lncRNA ref=JounralRNA transcriptId=3144 cpcScore=-0.6294880 cnci=-0.2777255	noncoding	0.0060378	0.214	31.36	18.83	1.67	up	---	n340681	NONCODE	accn=AK024346 class=mRNAlike lncRNA name=Human lncRNA ref=JounralRNA transcriptId=3144 cpcScore=-0.6294880 cnci=-0.2777255	chr5	+	149232600	149234584	---	---	---	---	---	---	---	---	---	---	---	---	---	---	main		PPARGC1B
TC02003914.hg.1	---	linc-MLPH-4 chr2:+:238121307-238121926	noncoding	0.0419299	0.366	47.01	27.92	1.68	up	---	TCONS_00004060-XLOC_001908	Rinn lincRNAs	linc-MLPH-4 chr2:+:238121307-238121926	chr2	+	238121308	238121926	---	---	---	---	---	---	---	---	---	---	---	---	---	---	main
TC03003311.hg.1	---	accn=D86979 class=mRNAlike lncRNA name=Human lncRNA ref=JounralRNA transcriptId=2210 cpcScore=11.9829000 cnci=-0.2330352	noncoding	0.0003372	0.104	175.57	104.52	1.68	up	---	n339763	NONCODE	accn=D86979 class=mRNAlike lncRNA name=Human lncRNA ref=JounralRNA transcriptId=2210 cpcScore=11.9829000 cnci=-0.2330352	chr3	-	197398856	197476259	---	---	---	---	---	---	---	---	---	---	---	---	---	---	main				FYTTD1
TC06002311.hg.1	---	cdna:known chromosome:GRCh37:6:167383114:167412553:-1 gene:ENSG00000227598 gene_biotype:antisense transcript_biotype:antisense | cdna:all chromosome:VEGA50:6:167383114:167412553:-1 Gene:OTTHUMG00000016010	noncoding	0.0290465	0.334	143.75	85.57	1.68	up	---	ENST00000444102	ENSEMBL // Havana transcript	cdna:known chromosome:GRCh37:6:167383114:167412553:-1 gene:ENSG00000227598 gene_biotype:antisense transcript_biotype:antisense // cdna:all chromosome:VEGA50:6:167383114:167412553:-1 Gene:OTTHUMG00000016010	chr6	-	167383114	167412553	---	---	---	---	---	---	---	---	---	---	---	---	---	---	main
TC07002378.hg.1	---	linc-VKORC1L1-5 chr7:+:65112776-65183632 | linc-VKORC1L1-5 chr7:+:65121845-65174629 | linc-VKORC1L1-5 chr7:+:65121856-65154426 | linc-VKORC1L1-5 chr7:+:65121886-65150708 | linc-VKORC1L1-5 chr7:+:65121932-65167794 | linc-VKORC1L1-5 chr7:+:65124599-65183669 | linc-VKORC1L1-5 chr7:+:65156536-65160173 | linc-VKORC1L1-5 chr7:+:65162818-65173519 | linc-VKORC1L1-5 chr7:+:65171484-65173506 | linc-VKORC1L…	noncoding	0.040865	0.364	76.6	45.68	1.68	up	---	TCONS_l2_00027132-XLOC_l2_013459	Broad TUCP // Broad TUCP // Broad TUCP // Broad TUCP // Broad TUCP // Broad TUCP // Broad TUCP // Broad TUCP // Broad TUCP // Broad TUCP	linc-VKORC1L1-5 chr7:+:65112776-65183632 // linc-VKORC1L1-5 chr7:+:65121845-65174629 // linc-VKORC1L1-5 chr7:+:65121856-65154426 // linc-VKORC1L1-5 chr7:+:65121886-65150708 // linc-VKORC1L1-5 chr7:+:65121932-65167794 // linc-VKORC1L1-5 chr7:+:65124599-65183669 // linc-VKORC1L1-5 chr7:+:65156536-65160173 // linc-VKORC1L1-5 chr7:+:65162818-65173519 // linc-VKORC1L1-5 chr7:+:65171484-65173506 // lin…	chr7	+	65112777	65183782	---	---	---	---	---	---	---	---	---	---	---	---	---	---	main
TC11002613.hg.1	---	accn=AJ131606 class=mRNAlike lncRNA name=NULL ref=H-invitational v7.5 transcriptId=HIT000244640 cpcScore=-1.0811200 cnci=-0.4745260	noncoding	0.0417715	0.365	13.43	8.01	1.68	up	---	n334766	NONCODE	accn=AJ131606 class=mRNAlike lncRNA name=NULL ref=H-invitational v7.5 transcriptId=HIT000244640 cpcScore=-1.0811200 cnci=-0.4745260	chr11	+	28316817	28317147	---	---	---	---	---	---	---	---	---	---	---	---	---	---	main		METTL15
TC11002959.hg.1	---	accn=NULL class=mRNAlike lncRNA name=vega lncRNA ref=GENCODE transcriptId=OTTHUMT00000316014 cpcScore=-1.1120900 cnci=-0.0657147	noncoding	0.0103823	0.249	55.78	33.26	1.68	up	---	n325820	NONCODE	accn=NULL class=mRNAlike lncRNA name=vega lncRNA ref=GENCODE transcriptId=OTTHUMT00000316014 cpcScore=-1.1120900 cnci=-0.0657147	chr11	+	130580104	130590268	---	---	---	---	---	---	---	---	---	---	---	---	---	---	main		C11orf44
TC17002799.hg.1	---	accn=NR_040071 class=lncRNA name= ref=RefGeneNoncode transcriptId=NR_040071 cpcScore=0.4394060 cnci=-0.1600037	noncoding	0.0006626	0.117	76.01	45.11	1.68	up	---	n411602	NONCODE	accn=NR_040071 class=lncRNA name= ref=RefGeneNoncode transcriptId=NR_040071 cpcScore=0.4394060 cnci=-0.1600037	chr17	-	76103483	76107880	---	---	---	---	---	---	---	---	---	---	---	---	---	---	main	TMC6 1119bp;			TNRC6C
TC02004153.hg.1	---	accn=NULL class=lincRNA name=Human lincRNA ref=Scripture Reconstruction LincRNAs By Luo transcriptId=linc_luo_1065 cpcScore=-1.4494000 cnci=-0.4407499	noncoding	0.0266277	0.326	13.46	7.97	1.69	up	---	n345516	NONCODE	accn=NULL class=lincRNA name=Human lincRNA ref=Scripture Reconstruction LincRNAs By Luo transcriptId=linc_luo_1065 cpcScore=-1.4494000 cnci=-0.4407499	chr2	-	32070221	32092722	---	---	---	---	---	---	---	---	---	---	---	---	---	---	main	MEMO1 156bp;
TC05001686.hg.1	---	havana:lincRNA chromosome:GRCh37:5:114539713:114541943:-1 gene:ENSG00000248175 gene_biotype:lincRNA transcript_biotype:lincRNA | cdna:all chromosome:VEGA50:5:114539713:114541943:-1 Gene:OTTHUMG00000162912	noncoding	0.0332557	0.344	12.43	7.37	1.69	up	---	ENST00000507241	ENSEMBL // Havana transcript	havana:lincRNA chromosome:GRCh37:5:114539713:114541943:-1 gene:ENSG00000248175 gene_biotype:lincRNA transcript_biotype:lincRNA // cdna:all chromosome:VEGA50:5:114539713:114541943:-1 Gene:OTTHUMG00000162912	chr5	-	114539713	114541943	---	---	---	---	---	---	---	---	---	---	---	---	---	---	main	PGGT1B 4584bp;
TC01004315.hg.1	---	accn=AK125879 class=mRNAlike lncRNA name=Human lncRNA ref=JounralRNA transcriptId=246 cpcScore=-0.2585130 cnci=-0.3162182	noncoding	0.0300104	0.335	24.45	14.38	1.7	up	---	n337863	NONCODE	accn=AK125879 class=mRNAlike lncRNA name=Human lncRNA ref=JounralRNA transcriptId=246 cpcScore=-0.2585130 cnci=-0.3162182	chr1	+	36391433	36395210	---	---	---	---	---	---	---	---	---	---	---	---	---	---	main	EIF2C1 1533bp;		EIF2C3 1109bp;
TC11003270.hg.1	---	accn=AK092185 class=mRNAlike lncRNA name=Human lncRNA ref=JounralRNA transcriptId=3547 cpcScore=-0.9804740 cnci=-0.3470685	noncoding	0.0125276	0.264	14.66	8.63	1.7	up	---	n341081	NONCODE	accn=AK092185 class=mRNAlike lncRNA name=Human lncRNA ref=JounralRNA transcriptId=3547 cpcScore=-0.9804740 cnci=-0.3470685	chr11	-	82686479	82688475	---	---	---	---	---	---	---	---	---	---	---	---	---	---	main		RAB30
TC12002547.hg.1	---	accn=BC010945 class=mRNAlike lncRNA name=NULL ref=H-invitational v7.5 transcriptId=HIT000087572 cpcScore=0.4107520 cnci=-0.0520248 | accn=BC071714 class=mRNAlike lncRNA name=NULL ref=H-invitational v7.5 transcriptId=HIT000264535 cpcScore=0.6095230 cnci=-0.1269339 | accn=BC104477 class=mRNAlike lncRNA name=NULL ref=H-invitational v7.5 transcriptId=HIT000337771 cpcScore=0.4115570 cnci=-0.0946573	noncoding	0.048347	0.378	286.21	168.21	1.7	up	---	n333415	NONCODE // NONCODE // NONCODE	accn=BC010945 class=mRNAlike lncRNA name=NULL ref=H-invitational v7.5 transcriptId=HIT000087572 cpcScore=0.4107520 cnci=-0.0520248 // accn=BC071714 class=mRNAlike lncRNA name=NULL ref=H-invitational v7.5 transcriptId=HIT000264535 cpcScore=0.6095230 cnci=-0.1269339 // accn=BC104477 class=mRNAlike lncRNA name=NULL ref=H-invitational v7.5 transcriptId=HIT000337771 cpcScore=0.4115570 cnci=-0.0946573	chr12	+	104359629	104373763	---	---	---	---	---	---	---	---	---	---	---	---	---	---	main		TDG
TC13001682.hg.1	---	accn=AK000903 class=mRNAlike lncRNA name=Human lncRNA ref=JounralRNA transcriptId=3903 cpcScore=1.1171200 cnci=-0.2440895	noncoding	0.0055526	0.211	30.83	18.15	1.7	up	---	n341433	NONCODE	accn=AK000903 class=mRNAlike lncRNA name=Human lncRNA ref=JounralRNA transcriptId=3903 cpcScore=1.1171200 cnci=-0.2440895	chr13	-	110885115	110886524	---	---	---	---	---	---	---	---	---	---	---	---	---	---	main		COL4A1
TC04002943.hg.1	THAP9-AS1	THAP9 antisense RNA 1 (non-protein coding)	noncoding	0.0369598	0.354	43.43	25.39	1.71	up	---	NR_034075	RefSeq // RefSeq // RefSeq // ENSEMBL // UCSC Genes // UCSC Genes // UCSC Genes // UCSC Genes // Havana transcript // Havana transcript // Havana transcript // Havana transcript // Havana transcript // Havana transcript // Havana transcript // Havana transcript // Havana transcript // Havana transcript // Havana transcript // Havana transcript	Homo sapiens THAP9 antisense RNA 1 (non-protein coding) (THAP9-AS1), transcript variant 1, non-coding RNA. // Homo sapiens THAP9 antisense RNA 1 (non-protein coding) (THAP9-AS1), transcript variant 2, non-coding RNA. // Homo sapiens THAP9 antisense RNA 1 (non-protein coding) (THAP9-AS1), transcript variant 3, non-coding RNA. // cdna:known chromosome:GRCh37:4:83814690:83821661:-1 gene:ENSG00000251…	chr4	-	83814605	83822113	---	---	---	---	---	---	---	---	---	---	---	---	---	---	main	LIN54 9013bp;		SEC31A 2186bp;	THAP9
TC06002744.hg.1	---	linc-HMGA1-2 chr6:+:34187154-34188704	noncoding	0.0233444	0.312	44.19	25.87	1.71	up	---	TCONS_l2_00024184-XLOC_l2_012510	Broad TUCP	linc-HMGA1-2 chr6:+:34187154-34188704	chr6	+	34187155	34188704	---	---	---	---	---	---	---	---	---	---	---	---	---	---	main
TC0X002073.hg.1	---	accn=CR621898 class=mRNAlike lncRNA name=Human lncRNA ref=JounralRNA transcriptId=4707 cpcScore=-1.0817700 cnci=-0.4291540	noncoding	0.0001428	0.091	14.75	8.62	1.71	up	---	n342217	NONCODE	accn=CR621898 class=mRNAlike lncRNA name=Human lncRNA ref=JounralRNA transcriptId=4707 cpcScore=-1.0817700 cnci=-0.4291540	chrX	-	52861124	52861635	---	---	---	---	---	---	---	---	---	---	---	---	---	---	main
TC15002244.hg.1	---	accn=BC047114 class=mRNAlike lncRNA name=Human lncRNA ref=JounralRNA transcriptId=262 cpcScore=-0.8524180 cnci=-0.4397534	noncoding	0.0282495	0.331	33.59	19.63	1.71	up	---	n337879	NONCODE	accn=BC047114 class=mRNAlike lncRNA name=Human lncRNA ref=JounralRNA transcriptId=262 cpcScore=-0.8524180 cnci=-0.4397534	chr15	+	66183109	66184329	---	---	---	---	---	---	---	---	---	---	---	---	---	---	main		RAB11A
TC11002898.hg.1	---	accn=NR_033759 class=lncRNA name= ref=RefGeneNoncode transcriptId=NR_033759 cpcScore=1.8043100 cnci=-0.3303281	noncoding	0.0395319	0.361	75.12	43.75	1.72	up	---	n409377	NONCODE	accn=NR_033759 class=lncRNA name= ref=RefGeneNoncode transcriptId=NR_033759 cpcScore=1.8043100 cnci=-0.3303281	chr11	+	118272104	118280562	---	---	---	---	---	---	---	---	---	---	---	---	---	---	main	UBE4A 2178bp;	ATP5L
TC03001088.hg.1	MIR570	microRNA 570	noncoding	0.0164253	0.284	9.9	5.72	1.73	up	---	NR_030296	RefSeq // ENSEMBL // UCSC Genes	Homo sapiens microRNA 570 (MIR570), microRNA. // ncrna:miRNA chromosome:GRCh37:3:195426272:195426368:1 gene:ENSG00000207650 gene_biotype:miRNA transcript_biotype:miRNA // ---	chr3	+	195426272	195426368	---	---	---	---	---	---	---	---	---	---	---	---	---	---	main		LOC440993 MUC20
TC03003246.hg.1	---	accn=NR_024534 class=lncRNA name= ref=RefGeneNoncode transcriptId=NR_024534 cpcScore=7.1518300 cnci=-0.0494646 | accn=NR_024533 class=lncRNA name= ref=RefGeneNoncode transcriptId=NR_024533 cpcScore=6.4897800 cnci=-0.0456455	noncoding	0.0076824	0.23	568.3	328.27	1.73	up	---	n407038	NONCODE // NONCODE	accn=NR_024534 class=lncRNA name= ref=RefGeneNoncode transcriptId=NR_024534 cpcScore=7.1518300 cnci=-0.0494646 // accn=NR_024533 class=lncRNA name= ref=RefGeneNoncode transcriptId=NR_024533 cpcScore=6.4897800 cnci=-0.0456455	chr3	-	183960117	183966759	---	---	---	---	---	---	---	---	---	---	---	---	---	---	main		ALG3		EIF2B5 VWA5B2
TC06003476.hg.1	---	accn=AL831898 class=mRNAlike lncRNA name=Human lncRNA ref=JounralRNA transcriptId=3316 cpcScore=1.6994200 cnci=-0.2450249	noncoding	0.0163757	0.284	90.47	52.35	1.73	up	---	n340852	NONCODE	accn=AL831898 class=mRNAlike lncRNA name=Human lncRNA ref=JounralRNA transcriptId=3316 cpcScore=1.6994200 cnci=-0.2450249	chr6	-	13358067	13361194	---	---	---	---	---	---	---	---	---	---	---	---	---	---	main		GFOD1
TC0X002081.hg.1	---	accn=AK124653 class=mRNAlike lncRNA name=Human lncRNA ref=JounralRNA transcriptId=107 cpcScore=-1.0725200 cnci=-0.3373205	noncoding	0.026488	0.325	19.79	11.45	1.73	up	---	n337725	NONCODE	accn=AK124653 class=mRNAlike lncRNA name=Human lncRNA ref=JounralRNA transcriptId=107 cpcScore=-1.0725200 cnci=-0.3373205	chrX	-	54219296	54222521	---	---	---	---	---	---	---	---	---	---	---	---	---	---	main		WNK3	FAM120C 9582bp;
TC10002888.hg.1	---	linc-ADAM12 chr10:-:128102437-128110448	noncoding	0.0228546	0.309	46.68	26.91	1.73	up	---	TCONS_00018066-XLOC_008985	Rinn lincRNAs	linc-ADAM12 chr10:-:128102437-128110448	chr10	-	128102438	128110448	---	---	---	---	---	---	---	---	---	---	---	---	---	---	main	C10orf90 3118bp;
TC12002192.hg.1	---	linc-NTF3 chr12:+:5385994-5487065 | linc-NTF3 chr12:+:5467491-5487416	noncoding	0.0001454	0.091	52.83	30.58	1.73	up	---	TCONS_00020281-XLOC_009627	Rinn lincRNAs // Rinn lincRNAs	linc-NTF3 chr12:+:5385994-5487065 // linc-NTF3 chr12:+:5467491-5487416	chr12	+	5385995	5487416	---	---	---	---	---	---	---	---	---	---	---	---	---	---	main
TC17002426.hg.1	---	accn=AK093557 class=mRNAlike lncRNA name=Human lncRNA ref=JounralRNA transcriptId=2872 cpcScore=1.0241600 cnci=-0.2180661	noncoding	0.0035306	0.184	15.75	9.11	1.73	up	---	n340411	NONCODE	accn=AK093557 class=mRNAlike lncRNA name=Human lncRNA ref=JounralRNA transcriptId=2872 cpcScore=1.0241600 cnci=-0.2180661	chr17	-	289773	292354	---	---	---	---	---	---	---	---	---	---	---	---	---	---	main		FAM101B
TC03002693.hg.1	---	accn=AF002816 class=mRNAlike lncRNA name=NULL ref=H-invitational v7.5 transcriptId=HIT000061695 cpcScore=1.8525300 cnci=-0.0950907	noncoding	0.0042048	0.193	1103.43	635.92	1.74	up	---	n332694	NONCODE	accn=AF002816 class=mRNAlike lncRNA name=NULL ref=H-invitational v7.5 transcriptId=HIT000061695 cpcScore=1.8525300 cnci=-0.0950907	chr3	+	184033948	184038499	---	---	---	---	---	---	---	---	---	---	---	---	---	---	main	PSMD2 7106bp;	EIF2B5 EIF4G1
TC16001659.hg.1	---	accn=AK095707 class=mRNAlike lncRNA name=Human lncRNA ref=JounralRNA transcriptId=1737 cpcScore=-1.0554400 cnci=-0.3054307	noncoding	0.0294905	0.335	42.19	24.21	1.74	up	---	n339305	NONCODE	accn=AK095707 class=mRNAlike lncRNA name=Human lncRNA ref=JounralRNA transcriptId=1737 cpcScore=-1.0554400 cnci=-0.3054307	chr16	+	81421430	81424413	---	---	---	---	---	---	---	---	---	---	---	---	---	---	main	GAN 7490bp;
TC19001351.hg.1	---	ncrna:lincRNA chromosome:GRCh37:19:21634858:21646686:-1 gene:ENSG00000249756	noncoding	0.0480456	0.377	53.64	30.76	1.74	up	---	ENST00000504832	ENSEMBL // UCSC Genes	ncrna:lincRNA chromosome:GRCh37:19:21634858:21646686:-1 gene:ENSG00000249756 // ---	chr19	-	21634856	21646686	---	---	---	---	---	---	---	---	---	---	---	---	---	---	main
TC08001845.hg.1	---	accn=AF147436 class=mRNAlike lncRNA name=Human lncRNA ref=JounralRNA transcriptId=3935 cpcScore=-1.2396000 cnci=-0.3250389	noncoding	0.0354912	0.35	26.76	15.28	1.75	up	---	n341465	NONCODE	accn=AF147436 class=mRNAlike lncRNA name=Human lncRNA ref=JounralRNA transcriptId=3935 cpcScore=-1.2396000 cnci=-0.3250389	chr8	+	25361928	25362494	---	---	---	---	---	---	---	---	---	---	---	---	---	---	main		CDCA2
TC09001913.hg.1	---	accn=NULL class=lincRNA name=Human lincRNA ref=Scripture Reconstruction LincRNAs By Luo transcriptId=linc_luo_1796 cpcScore=-1.5971500 cnci=-0.2538493 | linc-FAM75A1-6 chr9:+:38433723-38462264 | linc-FAM75A1-6 chr9:+:38435115-38462264	noncoding	0.0005597	0.113	33.7	19.26	1.75	up	---	n346246	NONCODE // Broad TUCP // Broad TUCP	accn=NULL class=lincRNA name=Human lincRNA ref=Scripture Reconstruction LincRNAs By Luo transcriptId=linc_luo_1796 cpcScore=-1.5971500 cnci=-0.2538493 // linc-FAM75A1-6 chr9:+:38433723-38462264 // linc-FAM75A1-6 chr9:+:38435115-38462264	chr9	+	38433724	38504777	---	---	---	---	---	---	---	---	---	---	---	---	---	---	main
TC06001918.hg.1	---	havana:lincRNA chromosome:GRCh37:6:86096937:86099904:-1 gene:ENSG00000234155 gene_biotype:lincRNA transcript_biotype:lincRNA | cdna:all chromosome:VEGA50:6:86096937:86099904:-1 Gene:OTTHUMG00000015137	noncoding	0.0321059	0.34	23.13	13.13	1.76	up	---	ENST00000455071	ENSEMBL // UCSC Genes // Havana transcript	havana:lincRNA chromosome:GRCh37:6:86096937:86099904:-1 gene:ENSG00000234155 gene_biotype:lincRNA transcript_biotype:lincRNA // --- // cdna:all chromosome:VEGA50:6:86096937:86099904:-1 Gene:OTTHUMG00000015137	chr6	-	86096937	86099904	---	---	---	---	---	---	---	---	---	---	---	---	---	---	main
TC07002365.hg.1	---	linc-ZNF107-3 chr7:+:64072127-64074198	noncoding	0.0424241	0.367	24.43	13.9	1.76	up	---	TCONS_00013478-XLOC_006126	Rinn lincRNAs	linc-ZNF107-3 chr7:+:64072127-64074198	chr7	+	64072128	64074198	---	---	---	---	---	---	---	---	---	---	---	---	---	---	main
TC02002997.hg.1	---	accn=AK094194 class=mRNAlike lncRNA name=Human lncRNA ref=JounralRNA transcriptId=1050 cpcScore=1.0931800 cnci=-0.1963032	noncoding	0.030912	0.338	86.14	48.54	1.77	up	---	n338637	NONCODE	accn=AK094194 class=mRNAlike lncRNA name=Human lncRNA ref=JounralRNA transcriptId=1050 cpcScore=1.0931800 cnci=-0.1963032	chr2	+	3454789	3457703	---	---	---	---	---	---	---	---	---	---	---	---	---	---	main		TRAPPC12
TC09002365.hg.1	---	linc-WASH1-2 chr9:-:43948-52582	noncoding	0.0008933	0.126	37.21	21	1.77	up	---	TCONS_l2_00029157-XLOC_l2_015088	Broad TUCP	linc-WASH1-2 chr9:-:43948-52582	chr9	-	43949	52582	---	---	---	---	---	---	---	---	---	---	---	---	---	---	main
TC10002416.hg.1	---	linc-KLF6-1 chr10:-:4264062-4283144	noncoding	0.0360616	0.351	34.84	19.68	1.77	up	---	TCONS_00018874-XLOC_008701	Rinn lincRNAs	linc-KLF6-1 chr10:-:4264062-4283144	chr10	-	4264063	4283144	---	---	---	---	---	---	---	---	---	---	---	---	---	---	main		LOC100653264
TC03000442.hg.1	LOC401074	uncharacterized LOC401074	noncoding	0.0006664	0.117	64.64	36.27	1.78	up	3p12.3	NR_040004	RefSeq // RefSeq // ENSEMBL // UCSC Genes // UCSC Genes // Havana transcript // Havana transcript	Homo sapiens uncharacterized LOC401074 (LOC401074), transcript variant 1, non-coding RNA. // Homo sapiens uncharacterized LOC401074 (LOC401074), transcript variant 2, non-coding RNA. // ensembl_havana_lincrna:lincRNA chromosome:GRCh37:3:75723564:75725776:1 gene:ENSG00000242516 gene_biotype:lincRNA transcript_biotype:processed_transcript // --- // --- // cdna:all chromosome:VEGA50:3:75723564:75725…	chr3	+	75721432	75728454	---	---	---	---	---	---	---	---	---	---	---	---	---	---	main	FRG2C 5061bp;
TC06000657.hg.1	LOC730101	uncharacterized LOC730101	noncoding	0.0493258	0.379	68.89	38.76	1.78	up	6p12.2	NR_024403	RefSeq // RefSeq // UCSC Genes // UCSC Genes	Homo sapiens uncharacterized LOC730101 (LOC730101), transcript variant 1, non-coding RNA. // Homo sapiens uncharacterized LOC730101 (LOC730101), transcript variant 2, non-coding RNA. // --- // ---	chr6	+	52529199	52533951	---	---	---	---	---	---	---	---	---	---	---	---	---	---	main			TMEM14A 1933bp;
TC07002363.hg.1	---	linc-ZNF107-3 chr7:+:64035072-64078967 | linc-ZNF107-3 chr7:+:64060063-64064307 | linc-ZNF107-3 chr7:+:64063690-64065024 | linc-ZNF107-3 chr7:+:64074561-64080570	noncoding	0.0029052	0.171	31.74	17.82	1.78	up	---	TCONS_l2_00027130-XLOC_l2_013449	Broad TUCP // Broad TUCP // Broad TUCP // Broad TUCP	linc-ZNF107-3 chr7:+:64035072-64078967 // linc-ZNF107-3 chr7:+:64060063-64064307 // linc-ZNF107-3 chr7:+:64063690-64065024 // linc-ZNF107-3 chr7:+:64074561-64080570	chr7	+	64035073	64080570	---	---	---	---	---	---	---	---	---	---	---	---	---	---	main
TC04001935.hg.1	---	accn=AK125392 class=mRNAlike lncRNA name=Human lncRNA ref=JounralRNA transcriptId=2334 cpcScore=-1.1593800 cnci=-0.3197907	noncoding	0.0444246	0.371	22.96	12.84	1.79	up	---	n339886	NONCODE	accn=AK125392 class=mRNAlike lncRNA name=Human lncRNA ref=JounralRNA transcriptId=2334 cpcScore=-1.1593800 cnci=-0.3197907	chr4	+	20731428	20734177	---	---	---	---	---	---	---	---	---	---	---	---	---	---	main		PACRGL		KCNIP4
TC16000396.hg.1	---	cdna:pseudogene chromosome:GRCh37:16:33006369:33006839:1 gene:ENSG00000233732 gene_biotype:pseudogene transcript_biotype:processed_pseudogene	noncoding	0.0104577	0.25	37.05	20.7	1.79	up	---	ENST00000425181	ENSEMBL	cdna:pseudogene chromosome:GRCh37:16:33006369:33006839:1 gene:ENSG00000233732 gene_biotype:pseudogene transcript_biotype:processed_pseudogene	chr16	+	33006369	33006839	---	---	---	---	---	---	---	---	---	---	---	---	---	---	main
TC02000536.hg.1	MIR4435-1	microRNA 4435-1	noncoding	0.0457103	0.372	96.13	53.43	1.8	up	---	NR_039634	RefSeq // RefSeq // UCSC Genes	Homo sapiens microRNA 4435-1 (MIR4435-1), microRNA. // Homo sapiens microRNA 4435-2 (MIR4435-2), microRNA. // ---	chr2	+	87929274	87929353	---	---	---	---	---	---	---	---	---	---	---	---	---	---	main		RMND5A
TC03002223.hg.1	---	accn=AK027107 class=mRNAlike lncRNA name=Human lncRNA ref=JounralRNA transcriptId=1682 cpcScore=-1.0718700 cnci=-0.2886534	noncoding	0.036119	0.351	20.28	11.26	1.8	up	---	n339250	NONCODE	accn=AK027107 class=mRNAlike lncRNA name=Human lncRNA ref=JounralRNA transcriptId=1682 cpcScore=-1.0718700 cnci=-0.2886534	chr3	+	12450373	12451924	---	---	---	---	---	---	---	---	---	---	---	---	---	---	main		PPARG
TC09002160.hg.1	---	accn=BC039487 class=mRNAlike lncRNA name=Human lncRNA ref=JounralRNA transcriptId=4221 cpcScore=-1.3191600 cnci=-0.3078596 | linc-ZNF462-3 chr9:+:108870331-109173662	noncoding	0.0028365	0.171	19.6	10.84	1.81	up	---	n341748	NONCODE // Rinn lincRNAs	accn=BC039487 class=mRNAlike lncRNA name=Human lncRNA ref=JounralRNA transcriptId=4221 cpcScore=-1.3191600 cnci=-0.3078596 // linc-ZNF462-3 chr9:+:108870331-109173662	chr9	+	108870332	109173665	---	---	---	---	---	---	---	---	---	---	---	---	---	---	main
TC11002810.hg.1	---	accn=NR_024597 class=lncRNA name= ref=RefGeneNoncode transcriptId=NR_024597 cpcScore=1.8473600 cnci=-0.2967600 | accn=NR_024598 class=lncRNA name= ref=RefGeneNoncode transcriptId=NR_024598 cpcScore=1.9707800 cnci=-0.2740570 | accn=NR_024596 class=lncRNA name= ref=RefGeneNoncode transcriptId=NR_024596 cpcScore=3.9944600 cnci=-0.2946671	noncoding	0.0387772	0.359	111.14	61.48	1.81	up	---	n407096	NONCODE // NONCODE // NONCODE	accn=NR_024597 class=lncRNA name= ref=RefGeneNoncode transcriptId=NR_024597 cpcScore=1.8473600 cnci=-0.2967600 // accn=NR_024598 class=lncRNA name= ref=RefGeneNoncode transcriptId=NR_024598 cpcScore=1.9707800 cnci=-0.2740570 // accn=NR_024596 class=lncRNA name= ref=RefGeneNoncode transcriptId=NR_024596 cpcScore=3.9944600 cnci=-0.2946671	chr11	+	86013253	86056985	---	---	---	---	---	---	---	---	---	---	---	---	---	---	main		C11orf73
TC20001267.hg.1	---	accn=NULL class=lncRNA name= ref=EnsemblNoncode transcriptId=ENST00000441722 cpcScore=2.2134000 cnci=-0.1756911 | accn=NULL class=lncRNA name= ref=EnsemblNoncode transcriptId=ENST00000417721 cpcScore=2.0706300 cnci=-0.1504241 | accn=NR_003605 class=lncRNA name= ref=RefGeneNoncode transcriptId=NR_003605 cpcScore=1.7209600 cnci=-0.2211655 | accn=NR_003604 class=mRNAlike lncRNA name=Zfas1 ref=lncRNA…	noncoding	0.0475811	0.376	390.34	215.98	1.81	up	---	n378660	NONCODE // NONCODE // NONCODE // NONCODE // NONCODE // NONCODE // NONCODE // NONCODE // NONCODE // NONCODE // NONCODE	accn=NULL class=lncRNA name= ref=EnsemblNoncode transcriptId=ENST00000441722 cpcScore=2.2134000 cnci=-0.1756911 // accn=NULL class=lncRNA name= ref=EnsemblNoncode transcriptId=ENST00000417721 cpcScore=2.0706300 cnci=-0.1504241 // accn=NR_003605 class=lncRNA name= ref=RefGeneNoncode transcriptId=NR_003605 cpcScore=1.7209600 cnci=-0.2211655 // accn=NR_003604 class=mRNAlike lncRNA name=Zfas1 ref=lnc…	chr20	+	47894715	47905797	---	---	---	---	---	---	---	---	---	---	---	---	---	---	main				ZNFX1
TC07000397.hg.1	INTS4L2	integrator complex subunit 4-like 2	noncoding	0.0222395	0.307	168.64	92.61	1.82	up	7q11.21	NR_027392	RefSeq // ENSEMBL // UCSC Genes // GenBank	Homo sapiens integrator complex subunit 4-like 2 (INTS4L2), non-coding RNA. // cdna:known chromosome:GRCh37:7:65112777:65171399:1 gene:ENSG00000232270 gene_biotype:pseudogene transcript_biotype:processed_transcript // --- // Homo sapiens hypothetical protein FLJ25037, mRNA (cDNA clone MGC:133166 IMAGE:40024359), complete cds.	chr7	+	65112777	65183632	---	---	---	---	---	---	---	---	---	---	---	---	---	---	main
TC0X002295.hg.1	---	accn=NULL class=lncRNA name= ref=UCSCGeneNoncode transcriptId=uc004fmr.1 cpcScore=1.8773600 cnci=-0.2950634	noncoding	0.0476899	0.376	292.17	160.41	1.82	up	---	n385849	NONCODE	accn=NULL class=lncRNA name= ref=UCSCGeneNoncode transcriptId=uc004fmr.1 cpcScore=1.8773600 cnci=-0.2950634	chrX	-	154044612	154045787	---	---	---	---	---	---	---	---	---	---	---	---	---	---	main	CXorf68 5836bp;	MPP1
TC10000427.hg.1	CEP57L1P1	centrosomal protein 57kDa-like 1 pseudogene 1	noncoding	0.0150205	0.278	11.29	6.22	1.82	up	---	ENST00000437376	ENSEMBL	cdna:known chromosome:GRCh37:10:72149182:72149937:1 gene:ENSG00000224725 gene_biotype:pseudogene transcript_biotype:retrotransposed	chr10	+	72149182	72149937	---	---	---	---	---	---	---	---	---	---	---	---	---	---	main
TC02004559.hg.1	---	accn=NULL class=lncRNA name= ref=UCSCGeneNoncode transcriptId=uc002too.1 cpcScore=-1.0543000 cnci=-0.4869251	noncoding	0.0370333	0.354	11.26	6.16	1.83	up	---	n383730	NONCODE	accn=NULL class=lncRNA name= ref=UCSCGeneNoncode transcriptId=uc002too.1 cpcScore=-1.0543000 cnci=-0.4869251	chr2	-	128258673	128259739	---	---	---	---	---	---	---	---	---	---	---	---	---	---	main		IWS1
TC01002904.hg.1	DPYD-IT1	DPYD intronic transcript 1 (non-protein coding)	noncoding	0.042174	0.366	51.02	27.79	1.84	up	---	ENST00000424982	ENSEMBL // Havana transcript	havana:sense_intronic chromosome:GRCh37:1:97859710:97885697:-1 gene:ENSG00000232542 gene_biotype:sense_intronic transcript_biotype:sense_intronic // cdna:all chromosome:VEGA50:1:97859710:97885697:-1 Gene:OTTHUMG00000039679	chr1	-	97859710	97885697	---	---	---	---	---	---	---	---	---	---	---	---	---	---	main		DPYD
TC02004154.hg.1	---	accn=AK057760 class=mRNAlike lncRNA name=Human lncRNA ref=JounralRNA transcriptId=4898 cpcScore=2.1286800 cnci=-0.2503921	noncoding	0.024105	0.316	194.1	105.56	1.84	up	---	n342406	NONCODE	accn=AK057760 class=mRNAlike lncRNA name=Human lncRNA ref=JounralRNA transcriptId=4898 cpcScore=2.1286800 cnci=-0.2503921	chr2	-	32092896	32236385	---	---	---	---	---	---	---	---	---	---	---	---	---	---	main	DPY30 570bp;	MEMO1
TC03002877.hg.1	---	accn=BC061594 class=mRNAlike lncRNA name=Human lncRNA ref=JounralRNA transcriptId=4994 cpcScore=1.3089500 cnci=-0.3137037	noncoding	0.0422935	0.366	22.31	12.14	1.84	up	---	n342500	NONCODE	accn=BC061594 class=mRNAlike lncRNA name=Human lncRNA ref=JounralRNA transcriptId=4994 cpcScore=1.3089500 cnci=-0.3137037	chr3	-	42842342	42843311	---	---	---	---	---	---	---	---	---	---	---	---	---	---	main		HIGD1A
TC12000647.hg.1	---	cdna:known chromosome:GRCh37:12:76653685:76698911:1 gene:ENSG00000257219 gene_biotype:processed_transcript transcript_biotype:processed_transcript	noncoding	0.0018713	0.149	60.1	32.73	1.84	up	---	ENST00000553247	ENSEMBL	cdna:known chromosome:GRCh37:12:76653685:76698911:1 gene:ENSG00000257219 gene_biotype:processed_transcript transcript_biotype:processed_transcript	chr12	+	76653685	76698911	---	---	---	---	---	---	---	---	---	---	---	---	---	---	main
TC17002684.hg.1	---	accn=L39924 class=mRNAlike lncRNA name=Human lncRNA ref=JounralRNA transcriptId=5215 cpcScore=-1.0340600 cnci=-0.1178382	noncoding	0.0437114	0.369	164.84	88.98	1.85	up	---	n342713	NONCODE	accn=L39924 class=mRNAlike lncRNA name=Human lncRNA ref=JounralRNA transcriptId=5215 cpcScore=-1.0340600 cnci=-0.1178382	chr17	-	45759783	45760049	---	---	---	---	---	---	---	---	---	---	---	---	---	---	main				KPNB1
TC06002862.hg.1	---	accn=BC044916 class=mRNAlike lncRNA name=Human lncRNA ref=JounralRNA transcriptId=5403 cpcScore=-0.0188122 cnci=-0.3929114	noncoding	0.0041812	0.192	12.86	6.9	1.86	up	---	n342895	NONCODE	accn=BC044916 class=mRNAlike lncRNA name=Human lncRNA ref=JounralRNA transcriptId=5403 cpcScore=-0.0188122 cnci=-0.3929114	chr6	+	71221818	71225656	---	---	---	---	---	---	---	---	---	---	---	---	---	---	main		FAM135A
TC10002299.hg.1	---	accn=AF086181 class=mRNAlike lncRNA name=Human lncRNA ref=JounralRNA transcriptId=2605 cpcScore=-1.0082500 cnci=-0.2575023	noncoding	0.0322321	0.341	32.52	17.52	1.86	up	---	n340145	NONCODE	accn=AF086181 class=mRNAlike lncRNA name=Human lncRNA ref=JounralRNA transcriptId=2605 cpcScore=-1.0082500 cnci=-0.2575023	chr10	+	114716295	114716950	---	---	---	---	---	---	---	---	---	---	---	---	---	---	main		TCF7L2
TC15002549.hg.1	---	accn=AK022857 class=mRNAlike lncRNA name=Human lncRNA ref=JounralRNA transcriptId=151 cpcScore=-1.0428000 cnci=-0.3616125	noncoding	0.029857	0.335	20.56	11.08	1.86	up	---	n337769	NONCODE	accn=AK022857 class=mRNAlike lncRNA name=Human lncRNA ref=JounralRNA transcriptId=151 cpcScore=-1.0428000 cnci=-0.3616125	chr15	-	55903750	55906620	---	---	---	---	---	---	---	---	---	---	---	---	---	---	main		PRTG
TC20001440.hg.1	---	accn=BC062214 class=mRNAlike lncRNA name=NULL ref=H-invitational v7.5 transcriptId=HIT000260282 cpcScore=1.9429000 cnci=-0.4113902 | accn=BC104663 class=mRNAlike lncRNA name=NULL ref=H-invitational v7.5 transcriptId=HIT000337813 cpcScore=1.8474000 cnci=-0.1678356	noncoding	0.044798	0.371	114.44	61.39	1.86	up	---	n335510	NONCODE // NONCODE	accn=BC062214 class=mRNAlike lncRNA name=NULL ref=H-invitational v7.5 transcriptId=HIT000260282 cpcScore=1.9429000 cnci=-0.4113902 // accn=BC104663 class=mRNAlike lncRNA name=NULL ref=H-invitational v7.5 transcriptId=HIT000337813 cpcScore=1.8474000 cnci=-0.1678356	chr20	-	13763456	13765569	---	---	---	---	---	---	---	---	---	---	---	---	---	---	main		ESF1
TC03002732.hg.1	---	accn=BC005178 class=mRNAlike lncRNA name=NULL ref=H-invitational v7.5 transcriptId=HIT000086478 cpcScore=-1.1429900 cnci=-1.0000000	noncoding	0.0049899	0.204	43.54	23.3	1.87	up	---	n333380	NONCODE	accn=BC005178 class=mRNAlike lncRNA name=NULL ref=H-invitational v7.5 transcriptId=HIT000086478 cpcScore=-1.1429900 cnci=-1.0000000	chr3	+	193853937	193854176	---	---	---	---	---	---	---	---	---	---	---	---	---	---	main		HES1
TC05003365.hg.1	---	accn=EF077644 class=mRNAlike lncRNA name=NULL ref=H-invitational v7.5 transcriptId=HIT000394809 cpcScore=2.8824200 cnci=-0.2226371	noncoding	0.0467411	0.375	163.72	87.42	1.87	up	---	n337470	NONCODE	accn=EF077644 class=mRNAlike lncRNA name=NULL ref=H-invitational v7.5 transcriptId=HIT000394809 cpcScore=2.8824200 cnci=-0.2226371	chr5	-	176346203	176396708	---	---	---	---	---	---	---	---	---	---	---	---	---	---	main		UIMC1
TC06003678.hg.1	---	linc-DEFB112-2 chr6:-:51274334-51275340	noncoding	0.0375081	0.355	34.87	18.69	1.87	up	---	TCONS_l2_00024783-XLOC_l2_013011	Broad TUCP	linc-DEFB112-2 chr6:-:51274334-51275340	chr6	-	51274335	51275340	---	---	---	---	---	---	---	---	---	---	---	---	---	---	main
TC11002689.hg.1	---	accn=AK055468 class=mRNAlike lncRNA name=Human lncRNA ref=JounralRNA transcriptId=3502 cpcScore=-0.3182690 cnci=-0.3391661	noncoding	0.0266724	0.326	50.77	27.17	1.87	up	---	n341036	NONCODE	accn=AK055468 class=mRNAlike lncRNA name=Human lncRNA ref=JounralRNA transcriptId=3502 cpcScore=-0.3182690 cnci=-0.3391661	chr11	+	59570202	59573350	---	---	---	---	---	---	---	---	---	---	---	---	---	---	main		STX3
TC17002283.hg.1	---	accn=CR590425 class=mRNAlike lncRNA name=Human lncRNA ref=JounralRNA transcriptId=3216 cpcScore=-1.3159900 cnci=-0.3782068	noncoding	0.0268432	0.327	47.54	25.45	1.87	up	---	n340753	NONCODE	accn=CR590425 class=mRNAlike lncRNA name=Human lncRNA ref=JounralRNA transcriptId=3216 cpcScore=-1.3159900 cnci=-0.3782068	chr17	+	53239054	53241657	---	---	---	---	---	---	---	---	---	---	---	---	---	---	main		STXBP4
TC18000144.hg.1	ZNF271	zinc finger protein 271	noncoding	0.0466845	0.375	45.47	24.33	1.87	up	18q12	NR_024565	RefSeq // RefSeq // ENSEMBL // UCSC Genes // UCSC Genes // UCSC Genes	Homo sapiens zinc finger protein 271 (ZNF271), transcript variant 1, non-coding RNA. // Homo sapiens zinc finger protein 271 (ZNF271), transcript variant 2, non-coding RNA. // cdna:known chromosome:GRCh37:18:32870246:32890730:1 gene:ENSG00000257267 gene_biotype:pseudogene transcript_biotype:processed_transcript // --- // --- // ---	chr18	+	32870236	32890730	---	---	---	---	---	---	---	---	---	---	---	---	---	---	main
TC20001701.hg.1	---	linc-GATA5-3 chr20:-:61199862-61200695	noncoding	0.0032989	0.181	114.8	61.42	1.87	up	---	TCONS_00028462-XLOC_013835	Rinn lincRNAs	linc-GATA5-3 chr20:-:61199862-61200695	chr20	-	61199863	61200695	---	---	---	---	---	---	---	---	---	---	---	---	---	---	main
TC02001429.hg.1	---	ncrna:miRNA chromosome:GRCh37:2:236235002:236235095:1 gene:ENSG00000216002 gene_biotype:miRNA transcript_biotype:miRNA	noncoding	0.0463223	0.374	17.2	9.14	1.88	up	---	ENST00000401183	ENSEMBL	ncrna:miRNA chromosome:GRCh37:2:236235002:236235095:1 gene:ENSG00000216002 gene_biotype:miRNA transcript_biotype:miRNA	chr2	+	236235002	236235095	---	---	---	---	---	---	---	---	---	---	---	---	---	---	main
TC06004043.hg.1	---	accn=BC015835 class=mRNAlike lncRNA name=Human lncRNA ref=JounralRNA transcriptId=4678 cpcScore=-1.1571200 cnci=-0.3474295	noncoding	0.0446267	0.371	59.06	31.35	1.88	up	---	n342188	NONCODE	accn=BC015835 class=mRNAlike lncRNA name=Human lncRNA ref=JounralRNA transcriptId=4678 cpcScore=-1.1571200 cnci=-0.3474295	chr6	-	170884682	170886025	---	---	---	---	---	---	---	---	---	---	---	---	---	---	main		PDCD2
TC10000062.hg.1	LOC100507127	uncharacterized LOC100507127	noncoding	0.0150978	0.278	29.14	15.51	1.88	up	---	NR_038291	RefSeq // ENSEMBL // UCSC Genes // Havana transcript	Homo sapiens uncharacterized LOC100507127 (LOC100507127), non-coding RNA. // ensembl_havana_lincrna:lincRNA chromosome:GRCh37:10:6821560:6884868:1 gene:ENSG00000238266 gene_biotype:lincRNA transcript_biotype:processed_transcript // --- // cdna:all chromosome:VEGA50:10:6821560:6884868:1 Gene:OTTHUMG00000017627	chr10	+	6821560	6884868	---	---	---	---	---	---	---	---	---	---	---	---	---	---	main
TC19002491.hg.1	---	accn=M76743 class=mRNAlike lncRNA name=NULL ref=H-invitational v7.5 transcriptId=HIT000196381 cpcScore=0.2588640 cnci=-0.1440238	noncoding	0.0230012	0.31	51.62	27.47	1.88	up	---	n334140	NONCODE	accn=M76743 class=mRNAlike lncRNA name=NULL ref=H-invitational v7.5 transcriptId=HIT000196381 cpcScore=0.2588640 cnci=-0.1440238	chr19	-	43013360	43025500	---	---	---	---	---	---	---	---	---	---	---	---	---	---	main		CEACAM1
TC02003817.hg.1	---	accn=AK125369 class=mRNAlike lncRNA name=Human lncRNA ref=JounralRNA transcriptId=1559 cpcScore=4.8054700 cnci=-0.2810112	noncoding	0.0004524	0.107	68.93	36.57	1.89	up	---	n339129	NONCODE	accn=AK125369 class=mRNAlike lncRNA name=Human lncRNA ref=JounralRNA transcriptId=1559 cpcScore=4.8054700 cnci=-0.2810112	chr2	+	217081768	217084913	---	---	---	---	---	---	---	---	---	---	---	---	---	---	main
TC03002723.hg.1	---	accn=CR618967 class=mRNAlike lncRNA name=Human lncRNA ref=JounralRNA transcriptId=2187 cpcScore=-1.0771700 cnci=-0.3460740	noncoding	0.0470056	0.375	21.4	11.33	1.89	up	---	n339741	NONCODE	accn=CR618967 class=mRNAlike lncRNA name=Human lncRNA ref=JounralRNA transcriptId=2187 cpcScore=-1.0771700 cnci=-0.3460740	chr3	+	191089936	191090896	---	---	---	---	---	---	---	---	---	---	---	---	---	---	main		CCDC50
TC08001961.hg.1	---	linc-SULF1-2 chr8:+:69901719-69942176	noncoding	0.0065441	0.219	11.8	6.23	1.89	up	---	TCONS_00014746-XLOC_006830	Rinn lincRNAs	linc-SULF1-2 chr8:+:69901719-69942176	chr8	+	69901720	69942176	---	---	---	---	---	---	---	---	---	---	---	---	---	---	main
TC09002161.hg.1	---	linc-ZNF462-2 chr9:+:109040672-109367076 | linc-ZNF462-2 chr9:+:109213047-109367180 | linc-ZNF462-2 chr9:+:109213096-109367074 | linc-ZNF462-2 chr9:+:109262774-109367180	noncoding	0.0274908	0.328	25.68	13.5	1.9	up	---	TCONS_l2_00029827-XLOC_l2_014959	Broad TUCP // Broad TUCP // Broad TUCP // Broad TUCP	linc-ZNF462-2 chr9:+:109040672-109367076 // linc-ZNF462-2 chr9:+:109213047-109367180 // linc-ZNF462-2 chr9:+:109213096-109367074 // linc-ZNF462-2 chr9:+:109262774-109367180	chr9	+	109040673	109367180	---	---	---	---	---	---	---	---	---	---	---	---	---	---	main
TC02003345.hg.1	---	linc-POLE4 chr2:+:75145003-75170618 | linc-POLE4 chr2:+:75145274-75159921 | linc-POLE4 chr2:+:75145327-75165913 | linc-POLE4 chr2:+:75155365-75160151 | linc-POLE4 chr2:+:75158554-75165545 | linc-POLE4 chr2:+:75159309-75160224 | linc-POLE4 chr2:+:75159728-75165521 | linc-POLE4 chr2:+:75161162-75165558 | linc-POLE4 chr2:+:75167384-75169797	noncoding	0.0009888	0.128	26	13.56	1.92	up	---	TCONS_00003738-XLOC_001537	Rinn lincRNAs // Rinn lincRNAs // Rinn lincRNAs // Rinn lincRNAs // Rinn lincRNAs // Rinn lincRNAs // Rinn lincRNAs // Rinn lincRNAs // Rinn lincRNAs	linc-POLE4 chr2:+:75145003-75170618 // linc-POLE4 chr2:+:75145274-75159921 // linc-POLE4 chr2:+:75145327-75165913 // linc-POLE4 chr2:+:75155365-75160151 // linc-POLE4 chr2:+:75158554-75165545 // linc-POLE4 chr2:+:75159309-75160224 // linc-POLE4 chr2:+:75159728-75165521 // linc-POLE4 chr2:+:75161162-75165558 // linc-POLE4 chr2:+:75167384-75169797	chr2	+	75145004	75170618	---	---	---	---	---	---	---	---	---	---	---	---	---	---	main
TC05002418.hg.1	---	accn=AY027770 class=mRNAlike lncRNA name=NULL ref=H-invitational v7.5 transcriptId=HIT000083270 cpcScore=1.5982400 cnci=-0.3475018	noncoding	0.0459579	0.373	1170.27	605.18	1.93	up	---	n333275	NONCODE	accn=AY027770 class=mRNAlike lncRNA name=NULL ref=H-invitational v7.5 transcriptId=HIT000083270 cpcScore=1.5982400 cnci=-0.3475018	chr5	+	68470753	68471373	---	---	---	---	---	---	---	---	---	---	---	---	---	---	main		CCNB1
TC06003460.hg.1	---	linc-TFAP2A-3 chr6:-:10460124-10460788	noncoding	0.0341782	0.347	31.3	16.24	1.93	up	---	TCONS_l2_00024608-XLOC_l2_012870	Broad TUCP	linc-TFAP2A-3 chr6:-:10460124-10460788	chr6	-	10460125	10460788	---	---	---	---	---	---	---	---	---	---	---	---	---	---	main
TC10002264.hg.1	---	accn=AL137373 class=mRNAlike lncRNA name=NULL ref=H-invitational v7.5 transcriptId=HIT000025661 cpcScore=-1.2020200 cnci=-1.0000000	noncoding	0.0352762	0.35	16.97	8.8	1.93	up	---	n332616	NONCODE	accn=AL137373 class=mRNAlike lncRNA name=NULL ref=H-invitational v7.5 transcriptId=HIT000025661 cpcScore=-1.2020200 cnci=-1.0000000	chr10	+	105148626	105148836	---	---	---	---	---	---	---	---	---	---	---	---	---	---	main		TAF5	PDCD11 7569bp;
TC05002515.hg.1	---	accn=BC054885 class=mRNAlike lncRNA name=Human lncRNA ref=JounralRNA transcriptId=3012 cpcScore=6.0381600 cnci=-0.4240575	noncoding	0.0409021	0.364	42.51	21.91	1.94	up	---	n340550	NONCODE	accn=BC054885 class=mRNAlike lncRNA name=Human lncRNA ref=JounralRNA transcriptId=3012 cpcScore=6.0381600 cnci=-0.4240575	chr5	+	93954392	93989033	---	---	---	---	---	---	---	---	---	---	---	---	---	---	main		ANKRD32
TC11002699.hg.1	---	accn=NR_028473 class=lncRNA name= ref=RefGeneNoncode transcriptId=NR_028473 cpcScore=2.4325100 cnci=-0.1996683	noncoding	0.0154419	0.279	704.49	360.52	1.95	up	---	n408276	NONCODE	accn=NR_028473 class=lncRNA name= ref=RefGeneNoncode transcriptId=NR_028473 cpcScore=2.4325100 cnci=-0.1996683	chr11	+	61129473	61136975	---	---	---	---	---	---	---	---	---	---	---	---	---	---	main	DAK 8706bp;	TMEM138		CYBASC3
TC13001260.hg.1	---	accn=AK026784 class=mRNAlike lncRNA name=Human lncRNA ref=JounralRNA transcriptId=3892 cpcScore=-0.8946550 cnci=-0.4216153	noncoding	0.0019102	0.149	10.6	5.43	1.95	up	---	n341422	NONCODE	accn=AK026784 class=mRNAlike lncRNA name=Human lncRNA ref=JounralRNA transcriptId=3892 cpcScore=-0.8946550 cnci=-0.4216153	chr13	+	102371307	102373206	---	---	---	---	---	---	---	---	---	---	---	---	---	---	main		ITGBL1		FGF14
TC01004645.hg.1	---	linc-VANGL1-1 chr1:+:115724042-115765741	noncoding	0.0049453	0.203	17.42	8.89	1.96	up	---	TCONS_00001113-XLOC_000358	Rinn lincRNAs	linc-VANGL1-1 chr1:+:115724042-115765741	chr1	+	115724043	115765741	---	---	---	---	---	---	---	---	---	---	---	---	---	---	main
TC10002467.hg.1	---	accn=NULL class=lincRNA name=Human lincRNA ref=Scripture Reconstruction LincRNAs By Luo transcriptId=linc_luo_1355 cpcScore=-1.6840500 cnci=-0.2420885 | linc-KIN-6 chr10:-:10825866-10836940 | linc-KIN-6 chr10:-:10826401-10836877 | linc-KIN-6 chr10:-:10826401-10836877 | linc-KIN-6 chr10:-:10826417-10837007 | linc-KIN-6 chr10:-:10826417-10837007 | linc-KIN-6 chr10:-:10826436-10836943 | linc-KIN-6 c…	noncoding	0.0055429	0.211	72.78	37.18	1.96	up	---	n345806	NONCODE // Rinn lincRNAs // Rinn lincRNAs // Rinn lincRNAs // Rinn lincRNAs // Rinn lincRNAs // Rinn lincRNAs // Rinn lincRNAs // Rinn lincRNAs // Rinn lincRNAs	accn=NULL class=lincRNA name=Human lincRNA ref=Scripture Reconstruction LincRNAs By Luo transcriptId=linc_luo_1355 cpcScore=-1.6840500 cnci=-0.2420885 // linc-KIN-6 chr10:-:10825866-10836940 // linc-KIN-6 chr10:-:10826401-10836877 // linc-KIN-6 chr10:-:10826401-10836877 // linc-KIN-6 chr10:-:10826417-10837007 // linc-KIN-6 chr10:-:10826417-10837007 // linc-KIN-6 chr10:-:10826436-10836943 // linc-…	chr10	-	10825867	10837007	---	---	---	---	---	---	---	---	---	---	---	---	---	---	main
TC12002735.hg.1	---	accn=NULL class=lincRNA name=Human lincRNA ref=Scripture Reconstruction LincRNAs By Luo transcriptId=linc_luo_717 cpcScore=-1.2628100 cnci=-0.2951547	noncoding	0.0226765	0.309	13.89	7.09	1.96	up	---	n345168	NONCODE	accn=NULL class=lincRNA name=Human lincRNA ref=Scripture Reconstruction LincRNAs By Luo transcriptId=linc_luo_717 cpcScore=-1.2628100 cnci=-0.2951547	chr12	-	8145284	8169776	---	---	---	---	---	---	---	---	---	---	---	---	---	---	main				NECAP1
TC11001759.hg.1	---	cdna:known chromosome:GRCh37:11:49455025:49455990:-1 gene:ENSG00000226268 gene_biotype:pseudogene transcript_biotype:retrotransposed	noncoding	0.014276	0.275	68.82	34.94	1.97	up	---	ENST00000413181	ENSEMBL	cdna:known chromosome:GRCh37:11:49455025:49455990:-1 gene:ENSG00000226268 gene_biotype:pseudogene transcript_biotype:retrotransposed	chr11	-	49455025	49455990	---	---	---	---	---	---	---	---	---	---	---	---	---	---	main
TC03003201.hg.1	---	accn=AF487423 class=mRNAlike lncRNA name=NULL ref=H-invitational v7.5 transcriptId=HIT000080568 cpcScore=-1.0580000 cnci=-0.3135748	noncoding	0.0448137	0.371	25.86	13.07	1.98	up	---	n333221	NONCODE	accn=AF487423 class=mRNAlike lncRNA name=NULL ref=H-invitational v7.5 transcriptId=HIT000080568 cpcScore=-1.0580000 cnci=-0.3135748	chr3	-	168849202	168849668	---	---	---	---	---	---	---	---	---	---	---	---	---	---	main		MECOM
TC11003280.hg.1	---	accn=AK091677 class=mRNAlike lncRNA name=Human lncRNA ref=JounralRNA transcriptId=3555 cpcScore=-1.2844300 cnci=-0.3647149	noncoding	0.016613	0.285	17.42	8.79	1.98	up	---	n341089	NONCODE	accn=AK091677 class=mRNAlike lncRNA name=Human lncRNA ref=JounralRNA transcriptId=3555 cpcScore=-1.2844300 cnci=-0.3647149	chr11	-	86145966	86148324	---	---	---	---	---	---	---	---	---	---	---	---	---	---	main	ME3 3826bp;
TC07000955.hg.1	OR2A9P	olfactory receptor, family 2, subfamily A, member 9 pseudogene	noncoding	0.0002283	0.0941	33.95	17.07	1.99	up	7q35	ENST00000461471	ENSEMBL // UCSC Genes // UCSC Genes // UCSC Genes	cdna:putative chromosome:GRCh37:7:143995112:143998024:1 gene:ENSG00000228960 gene_biotype:pseudogene transcript_biotype:processed_transcript // --- // --- // ---	chr7	+	143991573	143998024	---	---	---	---	---	---	---	---	---	---	---	---	---	---	main
TC12000235.hg.1	---	cdna:known chromosome:GRCh37:12:21815247:21912966:1 gene:ENSG00000256615 gene_biotype:antisense transcript_biotype:antisense | cdna:known chromosome:GRCh37:12:21912914:21919639:1 gene:ENSG00000255644 gene_biotype:antisense transcript_biotype:antisense	noncoding	0.0472768	0.376	27.04	13.58	1.99	up	---	ENST00000541860	ENSEMBL // ENSEMBL	cdna:known chromosome:GRCh37:12:21815247:21912966:1 gene:ENSG00000256615 gene_biotype:antisense transcript_biotype:antisense // cdna:known chromosome:GRCh37:12:21912914:21919639:1 gene:ENSG00000255644 gene_biotype:antisense transcript_biotype:antisense	chr12	+	21815247	21919639	---	---	---	---	---	---	---	---	---	---	---	---	---	---	main				KCNJ8 LDHB
TC01000991.hg.1	---	ncrna:snoRNA chromosome:GRCh37:1:113195210:113195310:1 gene:ENSG00000238975 gene_biotype:snoRNA transcript_biotype:snoRNA	noncoding	0.0474551	0.376	31.91	15.98	2	up	---	ENST00000459345	ENSEMBL	ncrna:snoRNA chromosome:GRCh37:1:113195210:113195310:1 gene:ENSG00000238975 gene_biotype:snoRNA transcript_biotype:snoRNA	chr1	+	113195210	113195310	---	---	---	---	---	---	---	---	---	---	---	---	---	---	main		CAPZA1
TC09002377.hg.1	---	accn=NULL class=lincRNA name=Human lincRNA ref=Scripture Reconstruction LincRNAs By Luo transcriptId=linc_luo_587 cpcScore=-1.3242800 cnci=-0.3770076	noncoding	0.0438354	0.369	30.62	15.35	2	up	---	n345038	NONCODE	accn=NULL class=lincRNA name=Human lincRNA ref=Scripture Reconstruction LincRNAs By Luo transcriptId=linc_luo_587 cpcScore=-1.3242800 cnci=-0.3770076	chr9	-	2683510	2704737	---	---	---	---	---	---	---	---	---	---	---	---	---	---	main
TC12000182.hg.1	MIR614	microRNA 614	noncoding	0.0015468	0.142	865.69	433	2	up	12p13.1	NR_030345	RefSeq // RefSeq // ENSEMBL // ENSEMBL // ENSEMBL // UCSC Genes // UCSC Genes // GenBank	Homo sapiens microRNA 614 (MIR614), microRNA. // Homo sapiens G protein-coupled receptor, family C, group 5, member A (GPRC5A), mRNA. // cdna:known chromosome:GRCh37:12:13043716:13070871:1 gene:ENSG00000013588 gene_biotype:protein_coding transcript_biotype:protein_coding // ncrna:miRNA chromosome:GRCh37:12:13068763:13068852:1 gene:ENSG00000207817 gene_biotype:miRNA transcript_biotype:miRNA // cdn…	chr12	+	13043716	13070871	GO:0007165 // GO:0007186 // GO:0007165 // GO:0007186 // GO:0007165 // GO:0007186 // GO:0007165 // GO:0007186	signal transduction // G-protein coupled receptor signaling pathway // signal transduction // G-protein coupled receptor signaling pathway // signal transduction // G-protein coupled receptor signaling pathway // signal transduction // G-protein coupled receptor signaling pathway	traceable author statement // traceable author statement // traceable author statement // traceable author statement // traceable author statement // traceable author statement // traceable author statement // traceable author statement	GO:0005794 // GO:0005886 // GO:0005887 // GO:0030659 // GO:0005794 // GO:0005886 // GO:0005887 // GO:0030659 // GO:0005794 // GO:0005886 // GO:0005887 // GO:0030659 // GO:0005794 // GO:0005886 // GO:0005887 // GO:0030659	Golgi apparatus // plasma membrane // integral to plasma membrane // cytoplasmic vesicle membrane // Golgi apparatus // plasma membrane // integral to plasma membrane // cytoplasmic vesicle membrane // Golgi apparatus // plasma membrane // integral to plasma membrane // cytoplasmic vesicle membrane // Golgi apparatus // plasma membrane // integral to plasma membrane // cytoplasmic vesicle membrane	inferred from direct assay // inferred from direct assay // traceable author statement // inferred from electronic annotation // inferred from direct assay // inferred from direct assay // traceable author statement // inferred from electronic annotation // inferred from direct assay // inferred from direct assay // traceable author statement // inferred from electronic annotation // inferred fro…	GO:0004930 // GO:0004930 // GO:0004930 // GO:0004930	G-protein coupled receptor activity // G-protein coupled receptor activity // G-protein coupled receptor activity // G-protein coupled receptor activity	inferred from electronic annotation // inferred from electronic annotation // inferred from electronic annotation // inferred from electronic annotation	GenMAPP // GenMAPP	GPCRDB_Class_C_Metabotropic_glutamate_pheromone // GPCRDB_Class_C_Metabotropic_glutamate_pheromone	Pfam	IPR017978	GPCR, family 3, C-terminal	main
TC03003232.hg.1	---	accn=NR_033721 class=lncRNA name= ref=RefGeneNoncode transcriptId=NR_033721 cpcScore=1.1502500 cnci=-0.3804312 | accn=NR_033724 class=lncRNA name= ref=RefGeneNoncode transcriptId=NR_033724 cpcScore=0.0172577 cnci=-0.3073221 | accn=NR_033725 class=lncRNA name= ref=RefGeneNoncode transcriptId=NR_033725 cpcScore=-0.2028680 cnci=-0.3000372	noncoding	0.0071242	0.225	96.62	48.12	2.01	up	---	n409356	NONCODE // NONCODE // NONCODE	accn=NR_033721 class=lncRNA name= ref=RefGeneNoncode transcriptId=NR_033721 cpcScore=1.1502500 cnci=-0.3804312 // accn=NR_033724 class=lncRNA name= ref=RefGeneNoncode transcriptId=NR_033724 cpcScore=0.0172577 cnci=-0.3073221 // accn=NR_033725 class=lncRNA name= ref=RefGeneNoncode transcriptId=NR_033725 cpcScore=-0.2028680 cnci=-0.3000372	chr3	-	180701498	180707562	---	---	---	---	---	---	---	---	---	---	---	---	---	---	main		DNAJC19
TC08001816.hg.1	---	accn=AL512749 class=mRNAlike lncRNA name=Human lncRNA ref=JounralRNA transcriptId=3924 cpcScore=-1.2005700 cnci=-0.3602188	noncoding	0.0340169	0.346	33.04	16.24	2.03	up	---	n341454	NONCODE	accn=AL512749 class=mRNAlike lncRNA name=Human lncRNA ref=JounralRNA transcriptId=3924 cpcScore=-1.2005700 cnci=-0.3602188	chr8	+	17426649	17428025	---	---	---	---	---	---	---	---	---	---	---	---	---	---	main		SLC7A2	PDGFRL 5917bp;
TC14000003.hg.1	---	ncrna:miRNA chromosome:GRCh37:14:19233262:19233343:1 gene:ENSG00000239113 gene_biotype:miRNA transcript_biotype:miRNA	noncoding	0.0159755	0.281	50.22	24.68	2.04	up	---	ENST00000459612	ENSEMBL	ncrna:miRNA chromosome:GRCh37:14:19233262:19233343:1 gene:ENSG00000239113 gene_biotype:miRNA transcript_biotype:miRNA	chr14	+	19233262	19233343	---	---	---	---	---	---	---	---	---	---	---	---	---	---	main
TC22000459.hg.1	---	ncrna:miRNA chromosome:GRCh37:22:16590274:16590355:-1 gene:ENSG00000222851 gene_biotype:miRNA transcript_biotype:miRNA	noncoding	0.0159755	0.281	50.22	24.68	2.04	up	---	ENST00000410919	ENSEMBL	ncrna:miRNA chromosome:GRCh37:22:16590274:16590355:-1 gene:ENSG00000222851 gene_biotype:miRNA transcript_biotype:miRNA	chr22	-	16590274	16590355	---	---	---	---	---	---	---	---	---	---	---	---	---	---	main
TC04002884.hg.1	---	accn=NR_028085 class=lncRNA name= ref=RefGeneNoncode transcriptId=NR_028085 cpcScore=4.9241200 cnci=-0.2997475	noncoding	0.0495236	0.379	69.07	33.48	2.06	up	---	n408138	NONCODE	accn=NR_028085 class=lncRNA name= ref=RefGeneNoncode transcriptId=NR_028085 cpcScore=4.9241200 cnci=-0.2997475	chr4	-	186320694	186347139	---	---	---	---	---	---	---	---	---	---	---	---	---	---	main		UFSP2	LRP2BP 3641bp;	ANKRD37
TC19002364.hg.1	---	accn=NULL class=lncRNA name= ref=EnsemblNoncode transcriptId=ENST00000509303 cpcScore=-1.0323900 cnci=-0.3455541	noncoding	0.0004076	0.107	40.51	19.65	2.06	up	---	n379872	NONCODE	accn=NULL class=lncRNA name= ref=EnsemblNoncode transcriptId=ENST00000509303 cpcScore=-1.0323900 cnci=-0.3455541	chr19	-	15940172	15946228	---	---	---	---	---	---	---	---	---	---	---	---	---	---	main
TC04002393.hg.1	---	accn=NR_036692 class=lncRNA name= ref=RefGeneNoncode transcriptId=NR_036692 cpcScore=8.6233200 cnci=-0.1497104 | linc-FRG1-5 chr4:+:190394300-190396344 | linc-FRG1-5 chr4:+:190395549-190396339	noncoding	0.0439195	0.37	74.24	35.74	2.08	up	---	n410189	NONCODE // Broad TUCP // Broad TUCP	accn=NR_036692 class=lncRNA name= ref=RefGeneNoncode transcriptId=NR_036692 cpcScore=8.6233200 cnci=-0.1497104 // linc-FRG1-5 chr4:+:190394300-190396344 // linc-FRG1-5 chr4:+:190395549-190396339	chr4	+	190394299	190396344	---	---	---	---	---	---	---	---	---	---	---	---	---	---	main
TC05002845.hg.1	---	accn=NR_036553 class=lncRNA name= ref=RefGeneNoncode transcriptId=NR_036553 cpcScore=2.1292300 cnci=-0.4066224	noncoding	0.0231795	0.311	44.35	21.37	2.08	up	---	n410120	NONCODE	accn=NR_036553 class=lncRNA name= ref=RefGeneNoncode transcriptId=NR_036553 cpcScore=2.1292300 cnci=-0.4066224	chr5	-	7859272	7869150	---	---	---	---	---	---	---	---	---	---	---	---	---	---	main		FASTKD3	C5orf49 7669bp;	MTRR
TC08002509.hg.1	---	accn=NR_027427 class=lncRNA name= ref=RefGeneNoncode transcriptId=NR_027427 cpcScore=3.7918100 cnci=-0.2452057	noncoding	0.0215516	0.305	40.94	19.7	2.08	up	---	n407869	NONCODE	accn=NR_027427 class=lncRNA name= ref=RefGeneNoncode transcriptId=NR_027427 cpcScore=3.7918100 cnci=-0.2452057	chr8	-	125500735	125551329	---	---	---	---	---	---	---	---	---	---	---	---	---	---	main		TATDN1		RNF139
TC21000151.hg.1	MEMO1P1	mediator of cell motility 1 pseudogene 1	noncoding	0.0179623	0.291	66.47	31.89	2.08	up	---	ENST00000412073	ENSEMBL	cdna:known chromosome:GRCh37:21:37502669:37504208:1 gene:ENSG00000226054 gene_biotype:pseudogene transcript_biotype:retrotransposed	chr21	+	37502669	37504208	---	---	---	---	---	---	---	---	---	---	---	---	---	---	main			CBR3 3002bp;
TC01004419.hg.1	---	accn=NULL class=lincRNA name=Human lincRNA ref=Scripture Reconstruction LincRNAs By Luo transcriptId=linc_luo_992 cpcScore=-1.5428800 cnci=-0.3357158	noncoding	0.0497103	0.38	53.92	25.8	2.09	up	---	n345443	NONCODE	accn=NULL class=lincRNA name=Human lincRNA ref=Scripture Reconstruction LincRNAs By Luo transcriptId=linc_luo_992 cpcScore=-1.5428800 cnci=-0.3357158	chr1	+	59222541	59233087	---	---	---	---	---	---	---	---	---	---	---	---	---	---	main
TC01005261.hg.1	---	accn=CR617316 class=mRNAlike lncRNA name=Human lncRNA ref=JounralRNA transcriptId=93 cpcScore=-1.0548000 cnci=-0.4775887	noncoding	0.0406271	0.363	44.57	21.28	2.09	up	---	n337711	NONCODE	accn=CR617316 class=mRNAlike lncRNA name=Human lncRNA ref=JounralRNA transcriptId=93 cpcScore=-1.0548000 cnci=-0.4775887	chr1	-	9986451	9987467	---	---	---	---	---	---	---	---	---	---	---	---	---	---	main		LZIC
TC03002999.hg.1	---	accn=AB083192 class=mRNAlike lncRNA name=NULL ref=H-invitational v7.5 transcriptId=HIT000061404 cpcScore=4.4440300 cnci=-0.2448033	noncoding	0.0093027	0.241	246.58	118.26	2.09	up	---	n332686	NONCODE	accn=AB083192 class=mRNAlike lncRNA name=NULL ref=H-invitational v7.5 transcriptId=HIT000061404 cpcScore=4.4440300 cnci=-0.2448033	chr3	-	97680499	97691284	---	---	---	---	---	---	---	---	---	---	---	---	---	---	main		MINA
TC03003213.hg.1	---	accn=AF085992 class=mRNAlike lncRNA name=Human lncRNA ref=JounralRNA transcriptId=2140 cpcScore=1.4816400 cnci=-0.3016567	noncoding	0.0043797	0.194	17.32	8.26	2.1	up	---	n339695	NONCODE	accn=AF085992 class=mRNAlike lncRNA name=Human lncRNA ref=JounralRNA transcriptId=2140 cpcScore=1.4816400 cnci=-0.3016567	chr3	-	172413336	172413925	---	---	---	---	---	---	---	---	---	---	---	---	---	---	main		NCEH1
TC04002094.hg.1	---	accn=D21211 class=mRNAlike lncRNA name=Human lncRNA ref=JounralRNA transcriptId=5112 cpcScore=16.5493000 cnci=-0.1473824	noncoding	0.015011	0.278	38.3	18.25	2.1	up	---	n342611	NONCODE	accn=D21211 class=mRNAlike lncRNA name=Human lncRNA ref=JounralRNA transcriptId=5112 cpcScore=16.5493000 cnci=-0.1473824	chr4	+	87515885	87736302	---	---	---	---	---	---	---	---	---	---	---	---	---	---	main		PTPN13
TC07002535.hg.1	---	accn=NULL class=lncRNA name= ref=UCSCGeneNoncode transcriptId=uc003vhq.1 cpcScore=-0.2111600 cnci=-0.2961631	noncoding	0.0255621	0.322	32.85	15.59	2.11	up	---	n385261	NONCODE	accn=NULL class=lncRNA name= ref=UCSCGeneNoncode transcriptId=uc003vhq.1 cpcScore=-0.2111600 cnci=-0.2961631	chr7	+	115893170	115895118	---	---	---	---	---	---	---	---	---	---	---	---	---	---	main		TES
TC08002542.hg.1	---	accn=AL833303 class=mRNAlike lncRNA name=Human lncRNA ref=JounralRNA transcriptId=4088 cpcScore=-1.0298700 cnci=-0.3703548	noncoding	0.0411223	0.365	20.58	9.77	2.11	up	---	n341617	NONCODE	accn=AL833303 class=mRNAlike lncRNA name=Human lncRNA ref=JounralRNA transcriptId=4088 cpcScore=-1.0298700 cnci=-0.3703548	chr8	-	135804263	135810515	---	---	---	---	---	---	---	---	---	---	---	---	---	---	main
TC03002920.hg.1	---	accn=AK025344 class=mRNAlike lncRNA name=Human lncRNA ref=JounralRNA transcriptId=4998 cpcScore=-0.3350680 cnci=-0.2725560	noncoding	0.0359622	0.351	118.22	55.75	2.12	up	---	n342504	NONCODE	accn=AK025344 class=mRNAlike lncRNA name=Human lncRNA ref=JounralRNA transcriptId=4998 cpcScore=-0.3350680 cnci=-0.2725560	chr3	-	53317449	53319252	---	---	---	---	---	---	---	---	---	---	---	---	---	---	main		DCP1A
TC07002868.hg.1	---	accn=NR_037669 class=lncRNA name= ref=RefGeneNoncode transcriptId=NR_037669 cpcScore=1.8041100 cnci=-0.2821401	noncoding	0.0469011	0.375	171.68	81.02	2.12	up	---	n410526	NONCODE	accn=NR_037669 class=lncRNA name= ref=RefGeneNoncode transcriptId=NR_037669 cpcScore=1.8041100 cnci=-0.2821401	chr7	-	30536237	30544457	---	---	---	---	---	---	---	---	---	---	---	---	---	---	main		GGCT
TC10002834.hg.1	---	accn=NR_024141 class=lncRNA name= ref=RefGeneNoncode transcriptId=NR_024141 cpcScore=0.5127830 cnci=-0.4068858	noncoding	0.0280113	0.33	111.54	52.56	2.12	up	---	n406618	NONCODE	accn=NR_024141 class=lncRNA name= ref=RefGeneNoncode transcriptId=NR_024141 cpcScore=0.5127830 cnci=-0.4068858	chr10	-	112658488	112679124	---	---	---	---	---	---	---	---	---	---	---	---	---	---	main		BBIP1		PDCD4
TC02004177.hg.1	---	accn=NR_028102 class=lncRNA name= ref=RefGeneNoncode transcriptId=NR_028102 cpcScore=8.5184500 cnci=-0.3387643	noncoding	0.0233418	0.312	56.29	26.44	2.13	up	---	n408145	NONCODE	accn=NR_028102 class=lncRNA name= ref=RefGeneNoncode transcriptId=NR_028102 cpcScore=8.5184500 cnci=-0.3387643	chr2	-	39963200	40006416	---	---	---	---	---	---	---	---	---	---	---	---	---	---	main		THUMPD2
TC11002195.hg.1	SNORA32	small nucleolar RNA, H/ACA box 32	noncoding	0.0309917	0.338	173.19	80.8	2.14	up	11q21	NR_003032	RefSeq // RefSeq // RefSeq // RefSeq // RefSeq // RefSeq // RefSeq // RefSeq // RefSeq // RefSeq // ENSEMBL // ENSEMBL // ENSEMBL // ENSEMBL // ENSEMBL // ENSEMBL // ENSEMBL // ENSEMBL // ENSEMBL // ENSEMBL // ENSEMBL // UCSC Genes // UCSC Genes // UCSC Genes // UCSC Genes // UCSC Genes // UCSC Genes // UCSC Genes // UCSC Genes // GenBank	Homo sapiens small nucleolar RNA, H/ACA box 32 (SNORA32), small nucleolar RNA. // Homo sapiens small nucleolar RNA, H/ACA box 1 (SNORA1), small nucleolar RNA. // Homo sapiens small nucleolar RNA, H/ACA box 18 (SNORA18), small nucleolar RNA. // Homo sapiens small nucleolar RNA, H/ACA box 8 (SNORA8), small nucleolar RNA. // Homo sapiens microRNA 1304 (MIR1304), microRNA. // Homo sapiens small nucle…	chr11	-	93463438	93475111	GO:0006351 // GO:0006355 // GO:0006351 // GO:0006355 // GO:0006351 // GO:0006355 // GO:0006351 // GO:0006355	transcription, DNA-dependent // regulation of transcription, DNA-dependent // transcription, DNA-dependent // regulation of transcription, DNA-dependent // transcription, DNA-dependent // regulation of transcription, DNA-dependent // transcription, DNA-dependent // regulation of transcription, DNA-dependent	inferred from electronic annotation // inferred from electronic annotation // inferred from electronic annotation // inferred from electronic annotation // inferred from electronic annotation // inferred from electronic annotation // inferred from electronic annotation // inferred from electronic annotation	GO:0005634 // GO:0005634 // GO:0005634 // GO:0005634	nucleus // nucleus // nucleus // nucleus	inferred from electronic annotation // inferred from electronic annotation // inferred from electronic annotation // inferred from electronic annotation	GO:0003677 // GO:0005515 // GO:0003677 // GO:0005515 // GO:0003677 // GO:0005515 // GO:0003677 // GO:0005515	DNA binding // protein binding // DNA binding // protein binding // DNA binding // protein binding // DNA binding // protein binding	inferred from electronic annotation // inferred from physical interaction // inferred from electronic annotation // inferred from physical interaction // inferred from electronic annotation // inferred from physical interaction // inferred from electronic annotation // inferred from physical interaction	---	---	---	---	---	main				C11orf54 KIAA1731
TC01004221.hg.1	---	accn=NR_033757 class=lncRNA name= ref=RefGeneNoncode transcriptId=NR_033757 cpcScore=0.2305920 cnci=-0.2286451	noncoding	0.0294523	0.335	355.68	165.26	2.15	up	---	n409375	NONCODE	accn=NR_033757 class=lncRNA name= ref=RefGeneNoncode transcriptId=NR_033757 cpcScore=0.2305920 cnci=-0.2286451	chr1	+	19923471	19956315	---	---	---	---	---	---	---	---	---	---	---	---	---	---	main		MINOS1
TC09002778.hg.1	---	accn=NR_027125 class=lncRNA name= ref=RefGeneNoncode transcriptId=NR_027125 cpcScore=3.2636500 cnci=-0.3045939	noncoding	0.0288451	0.333	231.72	107.78	2.15	up	---	n407656	NONCODE	accn=NR_027125 class=lncRNA name= ref=RefGeneNoncode transcriptId=NR_027125 cpcScore=3.2636500 cnci=-0.3045939	chr9	-	125001834	125027143	---	---	---	---	---	---	---	---	---	---	---	---	---	---	main		RBM18		MRRF
TC12001366.hg.1	AK4P3	adenylate kinase 4 pseudogene 3	noncoding	0.0335137	0.345	241.7	112.27	2.15	up	---	ENST00000438686	ENSEMBL	cdna:known chromosome:GRCh37:12:31768702:31769373:-1 gene:ENSG00000233381 gene_biotype:pseudogene transcript_biotype:retrotransposed	chr12	-	31768702	31769373	---	---	---	---	---	---	---	---	---	---	---	---	---	---	main
TC03003223.hg.1	---	accn=BC036485 class=mRNAlike lncRNA name=Human lncRNA ref=JounralRNA transcriptId=2144 cpcScore=-1.1767400 cnci=-0.4075087	noncoding	0.0332963	0.344	17.96	8.31	2.16	up	---	n339699	NONCODE	accn=BC036485 class=mRNAlike lncRNA name=Human lncRNA ref=JounralRNA transcriptId=2144 cpcScore=-1.1767400 cnci=-0.4075087	chr3	-	178735011	178737876	---	---	---	---	---	---	---	---	---	---	---	---	---	---	main		ZMAT3
TC09002777.hg.1	---	accn=NULL class=lncRNA name= ref=EnsemblNoncode transcriptId=ENST00000411790 cpcScore=-0.8210780 cnci=-0.2047555	noncoding	0.0056382	0.211	76.23	35.27	2.16	up	---	n377794	NONCODE	accn=NULL class=lncRNA name= ref=EnsemblNoncode transcriptId=ENST00000411790 cpcScore=-0.8210780 cnci=-0.2047555	chr9	-	124646915	124725998	---	---	---	---	---	---	---	---	---	---	---	---	---	---	main		TTLL11
TC04001192.hg.1	---	ncrna:miRNA chromosome:GRCh37:4:49601445:49601526:-1 gene:ENSG00000223099 gene_biotype:miRNA transcript_biotype:miRNA	noncoding	0.0370072	0.354	31.73	14.58	2.18	up	---	ENST00000411167	ENSEMBL	ncrna:miRNA chromosome:GRCh37:4:49601445:49601526:-1 gene:ENSG00000223099 gene_biotype:miRNA transcript_biotype:miRNA	chr4	-	49601445	49601526	---	---	---	---	---	---	---	---	---	---	---	---	---	---	main
TC09000737.hg.1	---	ncrna:snoRNA chromosome:GRCh37:9:133325241:133325342:1 gene:ENSG00000238298 gene_biotype:snoRNA transcript_biotype:snoRNA	noncoding	0.0171524	0.288	41.34	18.95	2.18	up	---	ENST00000458976	ENSEMBL	ncrna:snoRNA chromosome:GRCh37:9:133325241:133325342:1 gene:ENSG00000238298 gene_biotype:snoRNA transcript_biotype:snoRNA	chr9	+	133325241	133325342	---	---	---	---	---	---	---	---	---	---	---	---	---	---	main		ASS1
TC14001724.hg.1	---	accn=NULL class=lncRNA name= ref=EnsemblNoncode transcriptId=ENST00000229465 cpcScore=3.9625800 cnci=-0.2370311 | accn=NR_039985 class=lncRNA name= ref=RefGeneNoncode transcriptId=NR_039985 cpcScore=1.9715200 cnci=-0.3285468 | linc-HIF1A chr14:+:62024178-62120695 | linc-HIF1A chr14:+:62037133-62124479 | linc-HIF1A chr14:+:62037257-62125394 | linc-HIF1A chr14:+:62114219-62124492 | linc-HIF1A chr14…	noncoding	0.0051015	0.205	53.96	24.79	2.18	up	---	n377638	NONCODE // NONCODE // Broad TUCP // Broad TUCP // Broad TUCP // Broad TUCP // Broad TUCP // Broad TUCP // Broad TUCP	accn=NULL class=lncRNA name= ref=EnsemblNoncode transcriptId=ENST00000229465 cpcScore=3.9625800 cnci=-0.2370311 // accn=NR_039985 class=lncRNA name= ref=RefGeneNoncode transcriptId=NR_039985 cpcScore=1.9715200 cnci=-0.3285468 // linc-HIF1A chr14:+:62024178-62120695 // linc-HIF1A chr14:+:62037133-62124479 // linc-HIF1A chr14:+:62037257-62125394 // linc-HIF1A chr14:+:62114219-62124492 // linc-HIF1A…	chr14	+	62024179	62125394	---	---	---	---	---	---	---	---	---	---	---	---	---	---	main		PRKCH
TC03002864.hg.1	---	accn=AJ310892 class=mRNAlike lncRNA name=NULL ref=H-invitational v7.5 transcriptId=HIT000247078 cpcScore=2.6795200 cnci=-0.2038910 | accn=AJ310893 class=mRNAlike lncRNA name=NULL ref=H-invitational v7.5 transcriptId=HIT000247079 cpcScore=2.3961900 cnci=-0.0783379	noncoding	0.0002464	0.0973	68.34	31.2	2.19	up	---	n334857	NONCODE // NONCODE	accn=AJ310892 class=mRNAlike lncRNA name=NULL ref=H-invitational v7.5 transcriptId=HIT000247078 cpcScore=2.6795200 cnci=-0.2038910 // accn=AJ310893 class=mRNAlike lncRNA name=NULL ref=H-invitational v7.5 transcriptId=HIT000247079 cpcScore=2.3961900 cnci=-0.0783379	chr3	-	38651252	38663933	---	---	---	---	---	---	---	---	---	---	---	---	---	---	main		SCN5A
TC03003054.hg.1	---	accn=NULL class=lncRNA name= ref=UCSCGeneNoncode transcriptId=uc010hrq.1 cpcScore=-1.1563600 cnci=-0.3114283	noncoding	0.0267686	0.326	61.11	27.95	2.19	up	---	n386343	NONCODE	accn=NULL class=lncRNA name= ref=UCSCGeneNoncode transcriptId=uc010hrq.1 cpcScore=-1.1563600 cnci=-0.3114283	chr3	-	123210404	123211680	---	---	---	---	---	---	---	---	---	---	---	---	---	---	main		PTPLB PTPLB
TC09000541.hg.1	---	havana:lincRNA chromosome:GRCh37:9:109213097:109367076:1 gene:ENSG00000234323 gene_biotype:lincRNA transcript_biotype:lincRNA | havana:lincRNA chromosome:GRCh37:9:109040673:109367076:1 gene:ENSG00000234323 gene_biotype:lincRNA transcript_biotype:lincRNA | cdna:all chromosome:VEGA50:9:109213097:109367076:1 Gene:OTTHUMG00000020433 | cdna:all chromosome:VEGA50:9:109040673:109367076:1 Gene:OTTHUMG000…	noncoding	0.0296331	0.335	49.03	22.34	2.19	up	---	ENST00000425709	ENSEMBL // ENSEMBL // UCSC Genes // Havana transcript // Havana transcript	havana:lincRNA chromosome:GRCh37:9:109213097:109367076:1 gene:ENSG00000234323 gene_biotype:lincRNA transcript_biotype:lincRNA // havana:lincRNA chromosome:GRCh37:9:109040673:109367076:1 gene:ENSG00000234323 gene_biotype:lincRNA transcript_biotype:lincRNA // --- // cdna:all chromosome:VEGA50:9:109213097:109367076:1 Gene:OTTHUMG00000020433 // cdna:all chromosome:VEGA50:9:109040673:109367076:1 Gene:…	chr9	+	109040673	109367076	---	---	---	---	---	---	---	---	---	---	---	---	---	---	main
TC09001551.hg.1	TTLL11-IT1	TTLL11 intronic transcript 1 (non-protein coding)	noncoding	0.0031688	0.179	64.34	29.43	2.19	up	9q33.2	ENST00000411790	ENSEMBL // UCSC Genes // Havana transcript	ensembl_havana_lincrna:lincRNA chromosome:GRCh37:9:124646915:124725998:-1 gene:ENSG00000237548 gene_biotype:lincRNA transcript_biotype:processed_transcript // --- // cdna:all chromosome:VEGA50:9:124646915:124725998:-1 Gene:OTTHUMG00000020596	chr9	-	124646915	124725998	---	---	---	---	---	---	---	---	---	---	---	---	---	---	main		TTLL11
TC0X001825.hg.1	---	linc-TMEM164 chrX:+:108811930-108812305	noncoding	0.0187795	0.295	33.79	15.42	2.19	up	---	TCONS_l2_00030329-XLOC_l2_015596	Broad TUCP	linc-TMEM164 chrX:+:108811930-108812305	chrX	+	108811931	108812305	---	---	---	---	---	---	---	---	---	---	---	---	---	---	main
TC02003287.hg.1	---	accn=NULL class=mRNAlike lncRNA name=vega lncRNA ref=GENCODE transcriptId=OTTHUMT00000328528 cpcScore=4.0492000 cnci=-0.2929447 | accn=NULL class=mRNAlike lncRNA name=vega lncRNA ref=GENCODE transcriptId=OTTHUMT00000328009 cpcScore=3.6437700 cnci=-0.1786139 | accn=NULL class=mRNAlike lncRNA name=vega lncRNA ref=GENCODE transcriptId=OTTHUMT00000328529 cpcScore=3.7229100 cnci=-0.1557052	noncoding	0.0125262	0.264	105.54	47.93	2.2	up	---	n325281	NONCODE // NONCODE // NONCODE	accn=NULL class=mRNAlike lncRNA name=vega lncRNA ref=GENCODE transcriptId=OTTHUMT00000328528 cpcScore=4.0492000 cnci=-0.2929447 // accn=NULL class=mRNAlike lncRNA name=vega lncRNA ref=GENCODE transcriptId=OTTHUMT00000328009 cpcScore=3.6437700 cnci=-0.1786139 // accn=NULL class=mRNAlike lncRNA name=vega lncRNA ref=GENCODE transcriptId=OTTHUMT00000328529 cpcScore=3.7229100 cnci=-0.1557052	chr2	+	66407985	66409620	---	---	---	---	---	---	---	---	---	---	---	---	---	---	main
TC19001810.hg.1	ZNF702P	zinc finger protein 702, pseudogene	noncoding	0.0026338	0.167	106.56	48.44	2.2	up	19q13.41	NR_003578	RefSeq // ENSEMBL // UCSC Genes	Homo sapiens zinc finger protein 702, pseudogene (ZNF702P), non-coding RNA. // cdna:known chromosome:GRCh37:19:53471504:53496777:-1 gene:ENSG00000242779 gene_biotype:pseudogene transcript_biotype:processed_transcript // ---	chr19	-	53471504	53496784	GO:0006351 // GO:0006355 // GO:0006351 // GO:0006355	transcription, DNA-dependent // regulation of transcription, DNA-dependent // transcription, DNA-dependent // regulation of transcription, DNA-dependent	inferred from electronic annotation // inferred from electronic annotation // inferred from electronic annotation // inferred from electronic annotation	GO:0005634 // GO:0005634	nucleus // nucleus	inferred from electronic annotation // inferred from electronic annotation	GO:0003677 // GO:0008270 // GO:0003677 // GO:0008270	DNA binding // zinc ion binding // DNA binding // zinc ion binding	inferred from electronic annotation // inferred from electronic annotation // inferred from electronic annotation // inferred from electronic annotation	---	---	---	---	---	main
TC11003091.hg.1	---	accn=AJ011602 class=mRNAlike lncRNA name=Human lncRNA ref=JounralRNA transcriptId=3467 cpcScore=-1.0091900 cnci=-0.2999909	noncoding	0.0023865	0.162	37.99	17.22	2.21	up	---	n341001	NONCODE	accn=AJ011602 class=mRNAlike lncRNA name=Human lncRNA ref=JounralRNA transcriptId=3467 cpcScore=-1.0091900 cnci=-0.2999909	chr11	-	27717859	27899195	---	---	---	---	---	---	---	---	---	---	---	---	---	---	main		BDNF
TC02003309.hg.1	---	accn=NR_037862 class=lncRNA name= ref=RefGeneNoncode transcriptId=NR_037862 cpcScore=1.2447700 cnci=-0.2409466	noncoding	0.0138639	0.273	152.52	68.6	2.22	up	---	n410624	NONCODE	accn=NR_037862 class=lncRNA name= ref=RefGeneNoncode transcriptId=NR_037862 cpcScore=1.2447700 cnci=-0.2409466	chr2	+	70121075	70132368	---	---	---	---	---	---	---	---	---	---	---	---	---	---	main		SNRNP27	MXD1 9805bp;
TC02003919.hg.1	---	accn=AF115510 class=mRNAlike lncRNA name=Human lncRNA ref=JounralRNA transcriptId=4968 cpcScore=9.1632600 cnci=-0.3185668	noncoding	0.0472642	0.376	161.13	72.47	2.22	up	---	n342474	NONCODE	accn=AF115510 class=mRNAlike lncRNA name=Human lncRNA ref=JounralRNA transcriptId=4968 cpcScore=9.1632600 cnci=-0.3185668	chr2	+	238617185	238688130	---	---	---	---	---	---	---	---	---	---	---	---	---	---	main		LRRFIP1
TC12003091.hg.1	---	accn=S71022 class=mRNAlike lncRNA name=NULL ref=H-invitational v7.5 transcriptId=HIT000216389 cpcScore=2.3227500 cnci=-0.1362313	noncoding	0.0476092	0.376	4408.01	1984.32	2.22	up	---	n334336	NONCODE	accn=S71022 class=mRNAlike lncRNA name=NULL ref=H-invitational v7.5 transcriptId=HIT000216389 cpcScore=2.3227500 cnci=-0.1362313	chr12	-	112843090	112846325	---	---	---	---	---	---	---	---	---	---	---	---	---	---	main		RPL6
TC17000179.hg.1	MEIS3P1	Meis homeobox 3 pseudogene 1	noncoding	0.0496389	0.379	63.45	28.57	2.22	up	17p12	NR_002211	RefSeq // UCSC Genes	Homo sapiens Meis homeobox 3 pseudogene 1 (MEIS3P1), non-coding RNA. // ---	chr17	+	15690164	15693019	---	---	---	GO:0005634	nucleus	inferred from electronic annotation	GO:0003700 // GO:0043565	sequence-specific DNA binding transcription factor activity // sequence-specific DNA binding	inferred from electronic annotation // inferred from electronic annotation	---	---	---	---	---	main	RN5S436 4395bp;
TC10001030.hg.1	SFTA1P	surfactant associated 1, pseudogene	noncoding	0.0028397	0.171	100.83	45.26	2.23	up	10p14	NR_027082	RefSeq // ENSEMBL // ENSEMBL // ENSEMBL // UCSC Genes // Havana transcript // Havana transcript // Havana transcript	Homo sapiens surfactant associated 1, pseudogene (SFTA1P), non-coding RNA. // havana:lincRNA chromosome:GRCh37:10:10828603:10836930:-1 gene:ENSG00000225383 gene_biotype:lincRNA transcript_biotype:lincRNA // havana:lincRNA chromosome:GRCh37:10:10828607:10836943:-1 gene:ENSG00000225383 gene_biotype:lincRNA transcript_biotype:lincRNA // havana:lincRNA chromosome:GRCh37:10:10826402:10836877:-1 gene:E…	chr10	-	10826402	10836943	---	---	---	---	---	---	---	---	---	---	---	---	---	---	main
TC11001514.hg.1	---	cdna:known chromosome:GRCh37:11:27717859:27899195:-1 gene:ENSG00000255496 gene_biotype:processed_transcript transcript_biotype:processed_transcript	noncoding	0.015586	0.28	26.99	12.08	2.23	up	---	ENST00000530663	ENSEMBL	cdna:known chromosome:GRCh37:11:27717859:27899195:-1 gene:ENSG00000255496 gene_biotype:processed_transcript transcript_biotype:processed_transcript	chr11	-	27717859	27899195	---	---	---	---	---	---	---	---	---	---	---	---	---	---	main		BDNF
TC05002605.hg.1	---	accn=AK001007 class=mRNAlike lncRNA name=Human lncRNA ref=JounralRNA transcriptId=3069 cpcScore=0.2922610 cnci=-0.2551696	noncoding	0.0304595	0.337	31.32	13.97	2.24	up	---	n340607	NONCODE	accn=AK001007 class=mRNAlike lncRNA name=Human lncRNA ref=JounralRNA transcriptId=3069 cpcScore=0.2922610 cnci=-0.2551696	chr5	+	125832580	125834296	---	---	---	---	---	---	---	---	---	---	---	---	---	---	main	GRAMD3 394bp;
TC07002932.hg.1	---	accn=AK001279 class=mRNAlike lncRNA name=Human lncRNA ref=JounralRNA transcriptId=3713 cpcScore=-0.9910420 cnci=-0.3272744	noncoding	0.0327579	0.342	52.49	23.42	2.24	up	---	n341245	NONCODE	accn=AK001279 class=mRNAlike lncRNA name=Human lncRNA ref=JounralRNA transcriptId=3713 cpcScore=-0.9910420 cnci=-0.3272744	chr7	-	47994962	47996911	---	---	---	---	---	---	---	---	---	---	---	---	---	---	main		HUS1	PKD1L1 6874bp;
TC11003264.hg.1	---	accn=NR_027479 class=lncRNA name= ref=RefGeneNoncode transcriptId=NR_027479 cpcScore=5.8158400 cnci=-0.3062904	noncoding	0.0189459	0.295	73.23	32.73	2.24	up	---	n407912	NONCODE	accn=NR_027479 class=lncRNA name= ref=RefGeneNoncode transcriptId=NR_027479 cpcScore=5.8158400 cnci=-0.3062904	chr11	-	78147016	78285909	---	---	---	---	---	---	---	---	---	---	---	---	---	---	main		NARS2		LOC100506220
TC19002060.hg.1	---	linc-ZNF726-1 chr19:+:23734518-23741642 | linc-ZNF726-1 chr19:+:23740396-23741230	noncoding	0.027541	0.328	29.73	13.26	2.24	up	---	TCONS_00026969-XLOC_013022	Rinn lincRNAs // Rinn lincRNAs	linc-ZNF726-1 chr19:+:23734518-23741642 // linc-ZNF726-1 chr19:+:23740396-23741230	chr19	+	23734519	23741642	---	---	---	---	---	---	---	---	---	---	---	---	---	---	main
TC03002360.hg.1	---	accn=CR593615 class=mRNAlike lncRNA name=Human lncRNA ref=JounralRNA transcriptId=1813 cpcScore=2.0916000 cnci=-0.1613734	noncoding	0.0373874	0.355	128.22	56.84	2.26	up	---	n339381	NONCODE	accn=CR593615 class=mRNAlike lncRNA name=Human lncRNA ref=JounralRNA transcriptId=1813 cpcScore=2.0916000 cnci=-0.1613734	chr3	+	58291999	58304211	---	---	---	---	---	---	---	---	---	---	---	---	---	---	main		RPP14
TC03002650.hg.1	---	accn=NR_033702 class=lncRNA name= ref=RefGeneNoncode transcriptId=NR_033702 cpcScore=4.2999400 cnci=-0.3888907	noncoding	0.0317548	0.34	75.1	33.24	2.26	up	---	n409342	NONCODE	accn=NR_033702 class=lncRNA name= ref=RefGeneNoncode transcriptId=NR_033702 cpcScore=4.2999400 cnci=-0.3888907	chr3	+	169490853	169507504	---	---	---	---	---	---	---	---	---	---	---	---	---	---	main		MYNN
TC08000023.hg.1	MIR4659A	microRNA 4659a	noncoding	0.0084804	0.235	19.04	8.42	2.26	up	---	NR_039803	RefSeq // UCSC Genes	Homo sapiens microRNA 4659a (MIR4659A), microRNA. // ---	chr8	+	6602685	6602765	---	---	---	---	---	---	---	---	---	---	---	---	---	---	main		AGPAT5
TC03002352.hg.1	---	accn=NR_024460 class=lncRNA name= ref=RefGeneNoncode transcriptId=NR_024460 cpcScore=15.0299000 cnci=-0.3232742	noncoding	0.0203599	0.302	67.93	29.97	2.27	up	---	n406963	NONCODE	accn=NR_024460 class=lncRNA name= ref=RefGeneNoncode transcriptId=NR_024460 cpcScore=15.0299000 cnci=-0.3232742	chr3	+	56591184	56655848	---	---	---	---	---	---	---	---	---	---	---	---	---	---	main		CCDC66		FAM208A
TC01004790.hg.1	---	linc-KLHDC9 chr1:+:160864696-160866290	noncoding	0.0378364	0.356	619.87	272.46	2.28	up	---	TCONS_l2_00000663-XLOC_l2_000477	Broad TUCP	linc-KLHDC9 chr1:+:160864696-160866290	chr1	+	160864697	160866290	---	---	---	---	---	---	---	---	---	---	---	---	---	---	main
TC02004117.hg.1	---	accn=AK094821 class=mRNAlike lncRNA name=Human lncRNA ref=JounralRNA transcriptId=1120 cpcScore=4.8799600 cnci=-0.3125198	noncoding	0.0468065	0.375	73.91	32.39	2.28	up	---	n338700	NONCODE	accn=AK094821 class=mRNAlike lncRNA name=Human lncRNA ref=JounralRNA transcriptId=1120 cpcScore=4.8799600 cnci=-0.3125198	chr2	-	24056794	24149984	---	---	---	---	---	---	---	---	---	---	---	---	---	---	main		ATAD2B
TC02004201.hg.1	---	accn=AK124213 class=mRNAlike lncRNA name=Human lncRNA ref=JounralRNA transcriptId=1234 cpcScore=-1.1043800 cnci=-0.3716969	noncoding	0.0233788	0.312	24.7	10.8	2.29	up	---	n338811	NONCODE	accn=AK124213 class=mRNAlike lncRNA name=Human lncRNA ref=JounralRNA transcriptId=1234 cpcScore=-1.1043800 cnci=-0.3716969	chr2	-	44117987	44120782	---	---	---	---	---	---	---	---	---	---	---	---	---	---	main		LRPPRC
TCUn_gl000222000002.hg.1	LOC401074	uncharacterized LOC401074	noncoding	0.000999	0.129	82.6	35.8	2.31	up	3p12.3	NR_040004	RefSeq // RefSeq // UCSC Genes // UCSC Genes	Homo sapiens uncharacterized LOC401074 (LOC401074), transcript variant 1, non-coding RNA. // Homo sapiens uncharacterized LOC401074 (LOC401074), transcript variant 2, non-coding RNA. // --- // ---	chrUn_gl000222	-	74365	81351	---	---	---	---	---	---	---	---	---	---	---	---	---	---	main	FRG2C 5072bp;
TC04002614.hg.1	---	accn=NR_034075 class=lncRNA name= ref=RefGeneNoncode transcriptId=NR_034075 cpcScore=3.4368100 cnci=-0.3033780	noncoding	0.0422277	0.366	100.33	43.12	2.33	up	---	n409674	NONCODE	accn=NR_034075 class=lncRNA name= ref=RefGeneNoncode transcriptId=NR_034075 cpcScore=3.4368100 cnci=-0.3033780	chr4	-	83814605	83822069	---	---	---	---	---	---	---	---	---	---	---	---	---	---	main	LIN54 9057bp;		SEC31A 2186bp;	THAP9
TC02000468.hg.1	---	havana:lincRNA chromosome:GRCh37:2:75155366:75160151:1 gene:ENSG00000204792 gene_biotype:lincRNA transcript_biotype:lincRNA | havana:lincRNA chromosome:GRCh37:2:75158555:75165545:1 gene:ENSG00000204792 gene_biotype:lincRNA transcript_biotype:lincRNA | havana:lincRNA chromosome:GRCh37:2:75145275:75159921:1 gene:ENSG00000204792 gene_biotype:lincRNA transcript_biotype:lincRNA | cdna:all chromosome:V…	noncoding	0.0001015	0.0846	50	20.96	2.39	up	---	ENST00000377469	ENSEMBL // ENSEMBL // ENSEMBL // UCSC Genes // Havana transcript // Havana transcript // Havana transcript	havana:lincRNA chromosome:GRCh37:2:75155366:75160151:1 gene:ENSG00000204792 gene_biotype:lincRNA transcript_biotype:lincRNA // havana:lincRNA chromosome:GRCh37:2:75158555:75165545:1 gene:ENSG00000204792 gene_biotype:lincRNA transcript_biotype:lincRNA // havana:lincRNA chromosome:GRCh37:2:75145275:75159921:1 gene:ENSG00000204792 gene_biotype:lincRNA transcript_biotype:lincRNA // --- // cdna:all ch…	chr2	+	75145275	75165545	---	---	---	---	---	---	---	---	---	---	---	---	---	---	main
TC03002794.hg.1	---	accn=AK123966 class=mRNAlike lncRNA name=Human lncRNA ref=JounralRNA transcriptId=1677 cpcScore=-0.9132660 cnci=-0.2927124	noncoding	0.0254906	0.322	154.71	64.72	2.39	up	---	n339245	NONCODE	accn=AK123966 class=mRNAlike lncRNA name=Human lncRNA ref=JounralRNA transcriptId=1677 cpcScore=-0.9132660 cnci=-0.2927124	chr3	-	8918877	8921466	---	---	---	---	---	---	---	---	---	---	---	---	---	---	main		RAD18
TC03002770.hg.1	---	accn=AK125235 class=mRNAlike lncRNA name=Human lncRNA ref=JounralRNA transcriptId=4682 cpcScore=-1.0823500 cnci=-0.3084260	noncoding	0.0262751	0.325	79.48	33.12	2.4	up	---	n342192	NONCODE	accn=AK125235 class=mRNAlike lncRNA name=Human lncRNA ref=JounralRNA transcriptId=4682 cpcScore=-1.0823500 cnci=-0.3084260	chr3	+	197613328	197615303	---	---	---	---	---	---	---	---	---	---	---	---	---	---	main		LRCH3
TC15002373.hg.1	---	linc-ST8SIA2 chr15:+:92829080-92830420	noncoding	0.0411642	0.365	54.09	22.56	2.4	up	---	TCONS_l2_00008829-XLOC_l2_004791	Broad TUCP	linc-ST8SIA2 chr15:+:92829080-92830420	chr15	+	92829081	92830420	---	---	---	---	---	---	---	---	---	---	---	---	---	---	main
TC02003816.hg.1	---	accn=AK123804 class=mRNAlike lncRNA name=Human lncRNA ref=JounralRNA transcriptId=1558 cpcScore=-1.1953500 cnci=-0.3563616	noncoding	0.0063672	0.217	71.66	29.58	2.42	up	---	n339128	NONCODE	accn=AK123804 class=mRNAlike lncRNA name=Human lncRNA ref=JounralRNA transcriptId=1558 cpcScore=-1.1953500 cnci=-0.3563616	chr2	+	217076127	217078242	---	---	---	---	---	---	---	---	---	---	---	---	---	---	main	XRCC5 5101bp;
TC01004449.hg.1	---	accn=AK000776 class=mRNAlike lncRNA name=Human lncRNA ref=JounralRNA transcriptId=368 cpcScore=-1.1257800 cnci=-0.3705974	noncoding	0.0197576	0.299	52.71	21.58	2.44	up	---	n337982	NONCODE	accn=AK000776 class=mRNAlike lncRNA name=Human lncRNA ref=JounralRNA transcriptId=368 cpcScore=-1.1257800 cnci=-0.3705974	chr1	+	64645311	64647181	---	---	---	---	---	---	---	---	---	---	---	---	---	---	main		ROR1
TC02003129.hg.1	---	accn=NR_026735 class=lncRNA name= ref=RefGeneNoncode transcriptId=NR_026735 cpcScore=5.9484100 cnci=-0.2781116	noncoding	0.0332872	0.344	410.93	168.39	2.44	up	---	n407266	NONCODE	accn=NR_026735 class=lncRNA name= ref=RefGeneNoncode transcriptId=NR_026735 cpcScore=5.9484100 cnci=-0.2781116	chr2	+	27851863	27873713	---	---	---	---	---	---	---	---	---	---	---	---	---	---	main	ZNF512 5900bp;	GPN1		CCDC121 SUPT7L
TC03002440.hg.1	---	accn=AF086243 class=mRNAlike lncRNA name=NULL ref=H-invitational v7.5 transcriptId=HIT000067122 cpcScore=2.7425100 cnci=-0.3607680 | accn=AF155111 class=mRNAlike lncRNA name=NULL ref=H-invitational v7.5 transcriptId=HIT000071921 cpcScore=2.5655400 cnci=-0.2521696	noncoding	0.0477624	0.376	94.63	38.58	2.45	up	---	n332903	NONCODE // NONCODE	accn=AF086243 class=mRNAlike lncRNA name=NULL ref=H-invitational v7.5 transcriptId=HIT000067122 cpcScore=2.7425100 cnci=-0.3607680 // accn=AF155111 class=mRNAlike lncRNA name=NULL ref=H-invitational v7.5 transcriptId=HIT000071921 cpcScore=2.5655400 cnci=-0.2521696	chr3	+	101280723	101284078	---	---	---	---	---	---	---	---	---	---	---	---	---	---	main		TRMT10C	PCNP 8861bp;
TC12002982.hg.1	---	accn=NR_033192 class=lncRNA name= ref=RefGeneNoncode transcriptId=NR_033192 cpcScore=2.8939500 cnci=-0.2565755 | accn=AK001156 class=mRNAlike lncRNA name=NULL ref=H-invitational v7.5 transcriptId=HIT000003630 cpcScore=1.0301900 cnci=-0.3220577	noncoding	0.0381643	0.357	200.01	81.6	2.45	up	---	n409088	NONCODE // NONCODE	accn=NR_033192 class=lncRNA name= ref=RefGeneNoncode transcriptId=NR_033192 cpcScore=2.8939500 cnci=-0.2565755 // accn=AK001156 class=mRNAlike lncRNA name=NULL ref=H-invitational v7.5 transcriptId=HIT000003630 cpcScore=1.0301900 cnci=-0.3220577	chr12	-	82746083	82752584	---	---	---	---	---	---	---	---	---	---	---	---	---	---	main		CCDC59		C12orf26
TC02003690.hg.1	---	accn=NR_027862 class=lncRNA name= ref=RefGeneNoncode transcriptId=NR_027862 cpcScore=4.0438700 cnci=-0.2642172	noncoding	0.0219875	0.306	849.23	345.63	2.46	up	---	n408054	NONCODE	accn=NR_027862 class=lncRNA name= ref=RefGeneNoncode transcriptId=NR_027862 cpcScore=4.0438700 cnci=-0.2642172	chr2	+	172778935	172848600	---	---	---	---	---	---	---	---	---	---	---	---	---	---	main		HAT1		SLC25A12
TC04002090.hg.1	---	linc-MRPS18C chr4:+:84009929-84010241 | linc-MRPS18C chr4:+:84010099-84010394	noncoding	0.0354853	0.35	264.12	107.32	2.46	up	---	TCONS_00008143-XLOC_003595	Rinn lincRNAs // Rinn lincRNAs	linc-MRPS18C chr4:+:84009929-84010241 // linc-MRPS18C chr4:+:84010099-84010394	chr4	+	84009930	84010394	---	---	---	---	---	---	---	---	---	---	---	---	---	---	main
TC09002494.hg.1	---	accn=NULL class=lncRNA name= ref=UCSCGeneNoncode transcriptId=uc004aaz.1 cpcScore=-1.1713000 cnci=-0.2913921	noncoding	0.0002075	0.0941	182.54	73.41	2.49	up	---	n385517	NONCODE	accn=NULL class=lncRNA name= ref=UCSCGeneNoncode transcriptId=uc004aaz.1 cpcScore=-1.1713000 cnci=-0.2913921	chr9	-	38406526	38408241	---	---	---	---	---	---	---	---	---	---	---	---	---	---	main	IGFBPL1 750bp;
TC10002069.hg.1	---	accn=BC026277 class=mRNAlike lncRNA name=Human lncRNA ref=JounralRNA transcriptId=5098 cpcScore=-0.2827700 cnci=-0.5082432	noncoding	0.0407189	0.364	69.86	27.83	2.51	up	---	n342597	NONCODE	accn=BC026277 class=mRNAlike lncRNA name=Human lncRNA ref=JounralRNA transcriptId=5098 cpcScore=-0.2827700 cnci=-0.5082432	chr10	+	51723005	51724217	---	---	---	---	---	---	---	---	---	---	---	---	---	---	main		TIMM23B		AGAP8
TC02002966.hg.1	---	accn=NR_024080 class=lncRNA name= ref=RefGeneNoncode transcriptId=NR_024080 cpcScore=1.4522900 cnci=-0.3431117	noncoding	0.0440175	0.37	403.45	160.37	2.52	up	---	n406571	NONCODE	accn=NR_024080 class=lncRNA name= ref=RefGeneNoncode transcriptId=NR_024080 cpcScore=1.4522900 cnci=-0.3431117	chr2	+	264869	278282	---	---	---	---	---	---	---	---	---	---	---	---	---	---	main		ACP1		SH3YL1
TC11001884.hg.1	SNORD27	small nucleolar RNA, C/D box 27	noncoding	0.0397076	0.362	242.74	95.92	2.53	up	11q13	NR_002563	RefSeq // RefSeq // RefSeq // RefSeq // RefSeq // RefSeq // RefSeq // RefSeq // RefSeq // ENSEMBL // ENSEMBL // ENSEMBL // ENSEMBL // ENSEMBL // ENSEMBL // ENSEMBL // ENSEMBL // ENSEMBL // ENSEMBL // ENSEMBL // ENSEMBL // ENSEMBL // ENSEMBL // ENSEMBL // ENSEMBL // ENSEMBL // ENSEMBL // ENSEMBL // ENSEMBL // ENSEMBL // ENSEMBL // ENSEMBL // ENSEMBL // ENSEMBL // ENSEMBL // ENSEMBL // ENSEMBL // E…	Homo sapiens small nucleolar RNA, C/D box 27 (SNORD27), small nucleolar RNA. // Homo sapiens small nucleolar RNA, C/D box 29 (SNORD29), small nucleolar RNA. // Homo sapiens small nucleolar RNA, C/D box 26 (SNORD26), small nucleolar RNA. // Homo sapiens small nucleolar RNA, C/D box 30 (SNORD30), small nucleolar RNA. // Homo sapiens small nucleolar RNA, C/D box 28 (SNORD28), small nucleolar RNA. //…	chr11	-	62619460	62623386	---	---	---	---	---	---	---	---	---	---	---	---	---	---	main
TC03002674.hg.1	---	accn=AK021510 class=mRNAlike lncRNA name=Human lncRNA ref=JounralRNA transcriptId=2146 cpcScore=1.2857700 cnci=-0.4677131	noncoding	0.0334978	0.345	37.05	14.56	2.54	up	---	n339701	NONCODE	accn=AK021510 class=mRNAlike lncRNA name=Human lncRNA ref=JounralRNA transcriptId=2146 cpcScore=1.2857700 cnci=-0.4677131	chr3	+	178953578	178955289	---	---	---	---	---	---	---	---	---	---	---	---	---	---	main		PIK3CA
TC10001914.hg.1	---	accn=NR_034181 class=lncRNA name= ref=RefGeneNoncode transcriptId=NR_034181 cpcScore=2.7163900 cnci=-0.3539415	noncoding	0.046281	0.374	103	40.49	2.54	up	---	n409777	NONCODE	accn=NR_034181 class=lncRNA name= ref=RefGeneNoncode transcriptId=NR_034181 cpcScore=2.7163900 cnci=-0.3539415	chr10	+	14920782	14946304	---	---	---	---	---	---	---	---	---	---	---	---	---	---	main	HSPA14 7042bp;	SUV39H2		DCLRE1C
TC02001273.hg.1	PKI55	DKFZp434H1419	noncoding	0.0295006	0.335	54.19	21.15	2.56	up	2q35	NR_037701	RefSeq // UCSC Genes	Homo sapiens DKFZp434H1419 (PKI55), non-coding RNA. // ---	chr2	+	217081612	217084915	---	---	---	---	---	---	---	---	---	---	---	---	---	---	main
TC04002625.hg.1	---	accn=DQ459608 class=mRNAlike lncRNA name=NULL ref=H-invitational v7.5 transcriptId=HIT000343439 cpcScore=0.8545510 cnci=-0.3100911	noncoding	0.0021238	0.157	45.25	17.56	2.58	up	---	n337099	NONCODE	accn=DQ459608 class=mRNAlike lncRNA name=NULL ref=H-invitational v7.5 transcriptId=HIT000343439 cpcScore=0.8545510 cnci=-0.3100911	chr4	-	89052997	89061086	---	---	---	---	---	---	---	---	---	---	---	---	---	---	main		ABCG2
TC0X000515.hg.1	---	cdna:novel chromosome:GRCh37:X:105570887:105571051:1 gene:ENSG00000256709 gene_biotype:pseudogene transcript_biotype:retrotransposed	noncoding	0.0399757	0.362	247.96	96.24	2.58	up	---	ENST00000538229	ENSEMBL	cdna:novel chromosome:GRCh37:X:105570887:105571051:1 gene:ENSG00000256709 gene_biotype:pseudogene transcript_biotype:retrotransposed	chrX	+	105570887	105571051	---	---	---	---	---	---	---	---	---	---	---	---	---	---	main
TC12002256.hg.1	---	accn=NULL class=lncRNA name= ref=UCSCGeneNoncode transcriptId=uc001rbb.3 cpcScore=-0.1942030 cnci=-0.2081681	noncoding	0.006912	0.223	1375.84	532.85	2.58	up	---	n381846	NONCODE	accn=NULL class=lncRNA name= ref=UCSCGeneNoncode transcriptId=uc001rbb.3 cpcScore=-0.1942030 cnci=-0.2081681	chr12	+	13068126	13070865	---	---	---	---	---	---	---	---	---	---	---	---	---	---	main
TCUn_gl000222000005.hg.1	---	linc-ZBTB37 chrUn_gl000222:-:74365-81359	noncoding	1.26e-05	0.0388	78.09	30.23	2.58	up	---	TCONS_00030027-XLOC_014509	Rinn lincRNAs	linc-ZBTB37 chrUn_gl000222:-:74365-81359	chrUn_gl000222	-	74366	81359	---	---	---	---	---	---	---	---	---	---	---	---	---	---	main	FRG2C 5064bp;
TC03002702.hg.1	---	accn=NULL class=lincRNA name=Human lincRNA ref=Scripture Reconstruction LincRNAs By Luo transcriptId=linc_luo_324 cpcScore=-1.3561800 cnci=-0.3444551	noncoding	0.0121627	0.262	267.27	103.38	2.59	up	---	n344775	NONCODE	accn=NULL class=lincRNA name=Human lincRNA ref=Scripture Reconstruction LincRNAs By Luo transcriptId=linc_luo_324 cpcScore=-1.3561800 cnci=-0.3444551	chr3	+	185000760	185010833	---	---	---	---	---	---	---	---	---	---	---	---	---	---	main
TC04002654.hg.1	---	accn=AY429526 class=mRNAlike lncRNA name=NULL ref=H-invitational v7.5 transcriptId=HIT000254614 cpcScore=1.0569100 cnci=-0.3333869	noncoding	0.0465746	0.374	265.3	100.63	2.64	up	---	n335183	NONCODE	accn=AY429526 class=mRNAlike lncRNA name=NULL ref=H-invitational v7.5 transcriptId=HIT000254614 cpcScore=1.0569100 cnci=-0.3333869	chr4	-	104059527	104061564	---	---	---	---	---	---	---	---	---	---	---	---	---	---	main		CENPE
TC05003354.hg.1	---	accn=AF275799 class=mRNAlike lncRNA name=Human lncRNA ref=JounralRNA transcriptId=5216 cpcScore=-1.1985100 cnci=-1.0000000	noncoding	0.0407418	0.364	1161.05	439.82	2.64	up	---	n342714	NONCODE	accn=AF275799 class=mRNAlike lncRNA name=Human lncRNA ref=JounralRNA transcriptId=5216 cpcScore=-1.1985100 cnci=-1.0000000	chr5	-	172083326	172083570	---	---	---	---	---	---	---	---	---	---	---	---	---	---	main				NEURL1B
TC12002540.hg.1	---	accn=NULL class=lincRNA name=Human lincRNA ref=Scripture Reconstruction LincRNAs By Luo transcriptId=linc_luo_740 cpcScore=-1.3176100 cnci=-0.2841983	noncoding	0.0171594	0.288	36.17	13.69	2.64	up	---	n345191	NONCODE	accn=NULL class=lincRNA name=Human lincRNA ref=Scripture Reconstruction LincRNAs By Luo transcriptId=linc_luo_740 cpcScore=-1.3176100 cnci=-0.2841983	chr12	+	102601069	102601764	---	---	---	---	---	---	---	---	---	---	---	---	---	---	main	PARPBP 9771bp;
TC04002753.hg.1	---	accn=D86322 class=mRNAlike lncRNA name=Human lncRNA ref=JounralRNA transcriptId=2697 cpcScore=8.3169100 cnci=-0.3863954	noncoding	0.0323216	0.342	58.44	22.06	2.65	up	---	n340236	NONCODE	accn=D86322 class=mRNAlike lncRNA name=Human lncRNA ref=JounralRNA transcriptId=2697 cpcScore=8.3169100 cnci=-0.3863954	chr4	-	141309607	141348782	---	---	---	---	---	---	---	---	---	---	---	---	---	---	main		CLGN
TC16000385.hg.1	---	cdna:pseudogene chromosome:GRCh37:16:31973409:31985682:1 gene:ENSG00000197476 gene_biotype:pseudogene transcript_biotype:processed_pseudogene	noncoding	0.0017493	0.146	418.04	157.46	2.65	up	---	ENST00000356559	ENSEMBL // UCSC Genes	cdna:pseudogene chromosome:GRCh37:16:31973409:31985682:1 gene:ENSG00000197476 gene_biotype:pseudogene transcript_biotype:processed_pseudogene // ---	chr16	+	31973409	31985682	---	---	---	---	---	---	---	---	---	---	---	---	---	---	main
TC11002809.hg.1	---	accn=NR_036465 class=lncRNA name= ref=RefGeneNoncode transcriptId=NR_036465 cpcScore=2.0998100 cnci=-0.3377824	noncoding	0.0365506	0.353	168.85	63.38	2.66	up	---	n410028	NONCODE	accn=NR_036465 class=lncRNA name= ref=RefGeneNoncode transcriptId=NR_036465 cpcScore=2.0998100 cnci=-0.3377824	chr11	+	85339622	85347583	---	---	---	---	---	---	---	---	---	---	---	---	---	---	main		TMEM126B
TC03002705.hg.1	---	linc-DNAJB11-5 chr3:+:185543988-185545049	noncoding	0.0138188	0.272	40.19	15.07	2.67	up	---	TCONS_00006340-XLOC_002956	Rinn lincRNAs	linc-DNAJB11-5 chr3:+:185543988-185545049	chr3	+	185543989	185545049	---	---	---	---	---	---	---	---	---	---	---	---	---	---	main
TC0X000472.hg.1	---	cdna:known chromosome:GRCh37:X:100212364:100212528:1 gene:ENSG00000182574 gene_biotype:pseudogene transcript_biotype:retrotransposed	noncoding	0.0227929	0.309	262.28	98.05	2.67	up	---	ENST00000538938	ENSEMBL	cdna:known chromosome:GRCh37:X:100212364:100212528:1 gene:ENSG00000182574 gene_biotype:pseudogene transcript_biotype:retrotransposed	chrX	+	100212364	100212528	---	---	---	---	---	---	---	---	---	---	---	---	---	---	main		ARL13A
TC18000002.hg.1	ROCK1P1	Rho-associated, coiled-coil containing protein kinase 1 pseudogene 1	noncoding	0.0489071	0.379	82.16	30.73	2.67	up	18p11.32	NR_033770	RefSeq // UCSC Genes	Homo sapiens Rho-associated, coiled-coil containing protein kinase 1 pseudogene 1 (ROCK1P1), non-coding RNA. // ---	chr18	+	109065	122222	---	---	---	---	---	---	---	---	---	---	---	---	---	---	main
TC01005829.hg.1	---	accn=M60500 class=mRNAlike lncRNA name=NULL ref=H-invitational v7.5 transcriptId=HIT000195946 cpcScore=2.0942600 cnci=-0.0506227	noncoding	0.0295533	0.335	139.11	51.63	2.69	up	---	n334116	NONCODE	accn=M60500 class=mRNAlike lncRNA name=NULL ref=H-invitational v7.5 transcriptId=HIT000195946 cpcScore=2.0942600 cnci=-0.0506227	chr1	-	152286184	152286725	---	---	---	---	---	---	---	---	---	---	---	---	---	---	main		FLG
TC03002368.hg.1	---	accn=AK023371 class=mRNAlike lncRNA name=Human lncRNA ref=JounralRNA transcriptId=1816 cpcScore=-1.0678500 cnci=-0.3191025	noncoding	0.0354462	0.35	38.61	14.28	2.7	up	---	n339384	NONCODE	accn=AK023371 class=mRNAlike lncRNA name=Human lncRNA ref=JounralRNA transcriptId=1816 cpcScore=-1.0678500 cnci=-0.3191025	chr3	+	63989698	63997824	---	---	---	---	---	---	---	---	---	---	---	---	---	---	main	ATXN7 560bp;			PSMD6
TC04002890.hg.1	---	accn=EF139845 class=mRNAlike lncRNA name=NULL ref=H-invitational v7.5 transcriptId=HIT000394904 cpcScore=1.1616700 cnci=-0.2153239	noncoding	0.0354392	0.35	285.11	105.78	2.7	up	---	n337481	NONCODE	accn=EF139845 class=mRNAlike lncRNA name=NULL ref=H-invitational v7.5 transcriptId=HIT000394904 cpcScore=1.1616700 cnci=-0.2153239	chr4	-	187510227	187516954	---	---	---	---	---	---	---	---	---	---	---	---	---	---	main		FAT1
TC09002776.hg.1	---	accn=AK123875 class=mRNAlike lncRNA name=Human lncRNA ref=JounralRNA transcriptId=4252 cpcScore=-1.0490800 cnci=-0.2159462	noncoding	0.0001469	0.091	167.22	61.85	2.7	up	---	n341775	NONCODE	accn=AK123875 class=mRNAlike lncRNA name=Human lncRNA ref=JounralRNA transcriptId=4252 cpcScore=-1.0490800 cnci=-0.2159462	chr9	-	124577954	124580767	---	---	---	---	---	---	---	---	---	---	---	---	---	---	main	TTLL11 3437bp;
TC05003121.hg.1	---	accn=BC028585 class=mRNAlike lncRNA name=Human lncRNA ref=JounralRNA transcriptId=5165 cpcScore=0.9446330 cnci=-0.4096806	noncoding	0.0360427	0.351	230.82	85.15	2.71	up	---	n342663	NONCODE	accn=BC028585 class=mRNAlike lncRNA name=Human lncRNA ref=JounralRNA transcriptId=5165 cpcScore=0.9446330 cnci=-0.4096806	chr5	-	82348665	82373191	---	---	---	---	---	---	---	---	---	---	---	---	---	---	main		TMEM167A
TC06002277.hg.1	SNORA29	small nucleolar RNA, H/ACA box 29	noncoding	0.0278036	0.329	641.39	236.29	2.71	up	6q25.3	NR_002965	RefSeq // RefSeq // RefSeq // ENSEMBL // ENSEMBL // ENSEMBL // ENSEMBL // ENSEMBL // ENSEMBL // UCSC Genes // UCSC Genes // UCSC Genes // UCSC Genes // GenBank // Havana transcript // Havana transcript	Homo sapiens small nucleolar RNA, H/ACA box 29 (SNORA29), small nucleolar RNA. // Homo sapiens t-complex 1 (TCP1), transcript variant 2, mRNA. // Homo sapiens t-complex 1 (TCP1), transcript variant 1, mRNA. // cdna:known chromosome:GRCh37:6:160199530:160210781:-1 gene:ENSG00000120438 gene_biotype:protein_coding transcript_biotype:protein_coding // ncrna:snoRNA chromosome:GRCh37:6:160206626:160206…	chr6	-	160199530	160210781	GO:0006457 // GO:0007021 // GO:0044267 // GO:0051084 // GO:0006457 // GO:0007021 // GO:0044267 // GO:0051084 // GO:0006457 // GO:0007021 // GO:0044267 // GO:0051084 // GO:0006457 // GO:0007021 // GO:0044267 // GO:0051084 // GO:0006457 // GO:0007021 // GO:0044267 // GO:0051084 // GO:0006457 // GO:0007021 // GO:0044267 // GO:0051084 // GO:0006457 // GO:0007021 // GO:0044267 // GO:0051084 // GO:0006…	protein folding // tubulin complex assembly // cellular protein metabolic process // 'de novo' posttranslational protein folding // protein folding // tubulin complex assembly // cellular protein metabolic process // 'de novo' posttranslational protein folding // protein folding // tubulin complex assembly // cellular protein metabolic process // 'de novo' posttranslational protein folding // pro…	traceable author statement // non-traceable author statement // traceable author statement // traceable author statement // traceable author statement // non-traceable author statement // traceable author statement // traceable author statement // traceable author statement // non-traceable author statement // traceable author statement // traceable author statement // traceable author statement …	GO:0000242 // GO:0005634 // GO:0005720 // GO:0005730 // GO:0005737 // GO:0005794 // GO:0005813 // GO:0005829 // GO:0005832 // GO:0005874 // GO:0005886 // GO:0030054 // GO:0000242 // GO:0005634 // GO:0005720 // GO:0005730 // GO:0005737 // GO:0005794 // GO:0005813 // GO:0005829 // GO:0005832 // GO:0005874 // GO:0005886 // GO:0030054 // GO:0000242 // GO:0005634 // GO:0005720 // GO:0005730 // GO:0005…	pericentriolar material // nucleus // nuclear heterochromatin // nucleolus // cytoplasm // Golgi apparatus // centrosome // cytosol // chaperonin-containing T-complex // microtubule // plasma membrane // cell junction // pericentriolar material // nucleus // nuclear heterochromatin // nucleolus // cytoplasm // Golgi apparatus // centrosome // cytosol // chaperonin-containing T-complex // microtub…	inferred from electronic annotation // inferred from direct assay // inferred from electronic annotation // inferred from direct assay // inferred from direct assay // inferred from direct assay // inferred from direct assay // traceable author statement // inferred from electronic annotation // inferred from direct assay // inferred from direct assay // inferred from direct assay // inferred fro…	GO:0005524 // GO:0051082 // GO:0005524 // GO:0051082 // GO:0005524 // GO:0051082 // GO:0005524 // GO:0051082 // GO:0005524 // GO:0051082 // GO:0005524 // GO:0051082 // GO:0005524 // GO:0051082 // GO:0005524 // GO:0051082	ATP binding // unfolded protein binding // ATP binding // unfolded protein binding // ATP binding // unfolded protein binding // ATP binding // unfolded protein binding // ATP binding // unfolded protein binding // ATP binding // unfolded protein binding // ATP binding // unfolded protein binding // ATP binding // unfolded protein binding	inferred from electronic annotation // inferred from electronic annotation // inferred from electronic annotation // inferred from electronic annotation // inferred from electronic annotation // inferred from electronic annotation // inferred from electronic annotation // inferred from electronic annotation // inferred from electronic annotation // inferred from electronic annotation // inferred …	---	---	Pfam // Pfam // Pfam // Pfam	IPR002423 // IPR002423 // IPR002423 // IPR002423	Chaperonin Cpn60/TCP-1 // Chaperonin Cpn60/TCP-1 // Chaperonin Cpn60/TCP-1 // Chaperonin Cpn60/TCP-1	main				ACAT2
TC05001402.hg.1	ISCA1P1	iron-sulfur cluster assembly 1 homolog (S. cerevisiae) pseudogene 1	noncoding	0.0483026	0.378	185.79	67.71	2.74	up	---	ENST00000542811	ENSEMBL	cdna:known chromosome:GRCh37:5:62072704:62072796:-1 gene:ENSG00000217416 gene_biotype:pseudogene transcript_biotype:retrotransposed	chr5	-	62072704	62072796	---	---	---	---	---	---	---	---	---	---	---	---	---	---	main
TC06002992.hg.1	---	accn=NULL class=lncRNA name= ref=UCSCGeneNoncode transcriptId=uc003pup.1 cpcScore=-0.1552930 cnci=-0.3105278	noncoding	0.012824	0.265	68.22	24.92	2.74	up	---	n384996	NONCODE	accn=NULL class=lncRNA name= ref=UCSCGeneNoncode transcriptId=uc003pup.1 cpcScore=-0.1552930 cnci=-0.3105278	chr6	+	111347328	111349465	---	---	---	---	---	---	---	---	---	---	---	---	---	---	main	RPF2 25bp;
TC04001887.hg.1	---	accn=NR_026892 class=lncRNA name= ref=RefGeneNoncode transcriptId=NR_026892 cpcScore=-0.9666250 cnci=-0.2540893 | accn=CR594181 class=mRNAlike lncRNA name=Human lncRNA ref=JounralRNA transcriptId=2292 cpcScore=-0.7853090 cnci=-0.2003959 | accn=BC004397 class=mRNAlike lncRNA name=Human lncRNA ref=JounralRNA transcriptId=2293 cpcScore=-1.0423300 cnci=-0.2073841	noncoding	0.0331984	0.344	72.47	26.32	2.75	up	---	n407435	NONCODE // NONCODE // NONCODE	accn=NR_026892 class=lncRNA name= ref=RefGeneNoncode transcriptId=NR_026892 cpcScore=-0.9666250 cnci=-0.2540893 // accn=CR594181 class=mRNAlike lncRNA name=Human lncRNA ref=JounralRNA transcriptId=2292 cpcScore=-0.7853090 cnci=-0.2003959 // accn=BC004397 class=mRNAlike lncRNA name=Human lncRNA ref=JounralRNA transcriptId=2293 cpcScore=-1.0423300 cnci=-0.2073841	chr4	+	7755817	7780655	---	---	---	---	---	---	---	---	---	---	---	---	---	---	main				AFAP1
TC02000469.hg.1	---	havana:lincRNA chromosome:GRCh37:2:75167385:75169797:1 gene:ENSG00000230836 gene_biotype:lincRNA transcript_biotype:lincRNA | cdna:all chromosome:VEGA50:2:75167385:75169797:1 Gene:OTTHUMG00000152931	noncoding	0.0017915	0.147	33.48	12.03	2.78	up	---	ENST00000453951	ENSEMBL // Havana transcript	havana:lincRNA chromosome:GRCh37:2:75167385:75169797:1 gene:ENSG00000230836 gene_biotype:lincRNA transcript_biotype:lincRNA // cdna:all chromosome:VEGA50:2:75167385:75169797:1 Gene:OTTHUMG00000152931	chr2	+	75167385	75169797	---	---	---	---	---	---	---	---	---	---	---	---	---	---	main
TC12002874.hg.1	---	accn=CR613639 class=mRNAlike lncRNA name=NULL ref=H-invitational v7.5 transcriptId=HIT000292834 cpcScore=-1.3092100 cnci=-0.4153926	noncoding	0.0413991	0.365	239.43	86.15	2.78	up	---	n335665	NONCODE	accn=CR613639 class=mRNAlike lncRNA name=NULL ref=H-invitational v7.5 transcriptId=HIT000292834 cpcScore=-1.3092100 cnci=-0.4153926	chr12	-	50569572	50570160	---	---	---	---	---	---	---	---	---	---	---	---	---	---	main		LIMA1	CERS5 8367bp;
TC13001043.hg.1	---	accn=NULL class=lincRNA name=Human lincRNA ref=Scripture Reconstruction LincRNAs By Luo transcriptId=linc_luo_771 cpcScore=-1.3919000 cnci=-0.3917353 | accn=NULL class=lncRNA name= ref=UCSCGeneNoncode transcriptId=uc001uyq.1 cpcScore=-1.1955800 cnci=-0.3985802	noncoding	0.0406452	0.363	28.88	10.31	2.8	up	---	n345222	NONCODE // NONCODE	accn=NULL class=lincRNA name=Human lincRNA ref=Scripture Reconstruction LincRNAs By Luo transcriptId=linc_luo_771 cpcScore=-1.3919000 cnci=-0.3917353 // accn=NULL class=lncRNA name= ref=UCSCGeneNoncode transcriptId=uc001uyq.1 cpcScore=-1.1955800 cnci=-0.3985802	chr13	+	42812943	42817030	---	---	---	---	---	---	---	---	---	---	---	---	---	---	main		DGKH
TC11002682.hg.1	---	accn=NR_024091 class=lncRNA name= ref=RefGeneNoncode transcriptId=NR_024091 cpcScore=3.9201700 cnci=-0.2083488	noncoding	0.0470627	0.375	433.57	154.04	2.81	up	---	n406578	NONCODE	accn=NR_024091 class=lncRNA name= ref=RefGeneNoncode transcriptId=NR_024091 cpcScore=3.9201700 cnci=-0.2083488	chr11	+	58346587	58393205	---	---	---	---	---	---	---	---	---	---	---	---	---	---	main		CNTF
TC08001876.hg.1	---	accn=BC015965 class=mRNAlike lncRNA name=NULL ref=H-invitational v7.5 transcriptId=HIT000088870 cpcScore=1.6665700 cnci=-0.4240974	noncoding	0.0424579	0.367	249.85	87.65	2.85	up	---	n333436	NONCODE	accn=BC015965 class=mRNAlike lncRNA name=NULL ref=H-invitational v7.5 transcriptId=HIT000088870 cpcScore=1.6665700 cnci=-0.4240974	chr8	+	33342701	33346646	---	---	---	---	---	---	---	---	---	---	---	---	---	---	main		MAK16		TTI2
TC09002783.hg.1	---	accn=NR_033234 class=lncRNA name= ref=RefGeneNoncode transcriptId=NR_033234 cpcScore=10.2293000 cnci=-0.3406355	noncoding	0.0306128	0.337	115.92	40.7	2.85	up	---	n409105	NONCODE	accn=NR_033234 class=lncRNA name= ref=RefGeneNoncode transcriptId=NR_033234 cpcScore=10.2293000 cnci=-0.3406355	chr9	-	125883908	126030843	---	---	---	---	---	---	---	---	---	---	---	---	---	---	main		STRBP
TC03002724.hg.1	---	accn=AK055652 class=mRNAlike lncRNA name=Human lncRNA ref=JounralRNA transcriptId=2188 cpcScore=-1.1308000 cnci=-0.3698997	noncoding	0.0488375	0.379	59.41	20.68	2.87	up	---	n339742	NONCODE	accn=AK055652 class=mRNAlike lncRNA name=Human lncRNA ref=JounralRNA transcriptId=2188 cpcScore=-1.1308000 cnci=-0.3698997	chr3	+	191113180	191116458	---	---	---	---	---	---	---	---	---	---	---	---	---	---	main		CCDC50
TC17002061.hg.1	---	accn=NULL class=lncRNA name= ref=UCSCGeneNoncode transcriptId=uc010vvv.1 cpcScore=-1.0594100 cnci=-0.2289246	noncoding	0.0002957	0.104	212.22	73.92	2.87	up	---	n386977	NONCODE	accn=NULL class=lncRNA name= ref=UCSCGeneNoncode transcriptId=uc010vvv.1 cpcScore=-1.0594100 cnci=-0.2289246	chr17	+	14207057	14209061	---	---	---	---	---	---	---	---	---	---	---	---	---	---	main		HS3ST3B1
TC02004958.hg.1	LOC100505876	uncharacterized LOC100505876	noncoding	0.0305595	0.337	132.53	45.3	2.93	up	2p22	NR_037879	RefSeq // RefSeq // ENSEMBL // ENSEMBL // ENSEMBL // ENSEMBL // UCSC Genes // UCSC Genes // Havana transcript // Havana transcript // Havana transcript // Havana transcript // Havana transcript	Homo sapiens uncharacterized LOC100505876 (LOC100505876), transcript variant 1, non-coding RNA. // Homo sapiens uncharacterized LOC100505876 (LOC100505876), transcript variant 2, non-coding RNA. // cdna:novel chromosome:GRCh37:2:37423651:37431882:1 gene:ENSG00000218739 gene_biotype:protein_coding transcript_biotype:protein_coding // cdna:novel chromosome:GRCh37:2:37423666:37429835:1 gene:ENSG0000…	chr2	+	37423631	37431886	---	---	---	---	---	---	---	---	---	---	---	---	---	---	main				CEBPZ SULT6B1
TC19002006.hg.1	---	linc-OR7C2-1 chr19:+:14903113-14903565	noncoding	0.0383685	0.358	133.83	45.7	2.93	up	---	TCONS_00026907-XLOC_012980	Rinn lincRNAs	linc-OR7C2-1 chr19:+:14903113-14903565	chr19	+	14903114	14903565	---	---	---	---	---	---	---	---	---	---	---	---	---	---	main
TC01004261.hg.1	---	linc-WDTC1-1 chr1:+:27533428-27534178 | linc-WDTC1-1 chr1:+:27533432-27535176	noncoding	0.0432662	0.369	510.28	172.98	2.95	up	---	TCONS_l2_00000179-XLOC_l2_000121	Broad TUCP // Broad TUCP	linc-WDTC1-1 chr1:+:27533428-27534178 // linc-WDTC1-1 chr1:+:27533432-27535176	chr1	+	27533429	27535176	---	---	---	---	---	---	---	---	---	---	---	---	---	---	main
TC03002422.hg.1	---	accn=NR_033427 class=lncRNA name= ref=RefGeneNoncode transcriptId=NR_033427 cpcScore=5.4405000 cnci=-0.4809144	noncoding	0.018741	0.295	199.22	66.84	2.98	up	---	n409260	NONCODE	accn=NR_033427 class=lncRNA name= ref=RefGeneNoncode transcriptId=NR_033427 cpcScore=5.4405000 cnci=-0.4809144	chr3	+	93698983	93774522	---	---	---	---	---	---	---	---	---	---	---	---	---	---	main		ARL13B	NSUN3 7238bp;	DHFRL1 STX19
TC10002105.hg.1	---	accn=BC104671 class=mRNAlike lncRNA name=NULL ref=H-invitational v7.5 transcriptId=HIT000337821 cpcScore=1.5335400 cnci=-0.4036557	noncoding	0.0383688	0.358	531.8	178.7	2.98	up	---	n336966	NONCODE	accn=BC104671 class=mRNAlike lncRNA name=NULL ref=H-invitational v7.5 transcriptId=HIT000337821 cpcScore=1.5335400 cnci=-0.4036557	chr10	+	70715881	70719722	---	---	---	---	---	---	---	---	---	---	---	---	---	---	main	DDX50 9278bp;	DDX21
TC02003588.hg.1	---	linc-C2orf27A-1 chr2:+:132440112-132443258 | linc-C2orf27A-1 chr2:+:132442469-132457434	noncoding	0.0235923	0.313	70.59	23.64	2.99	up	---	TCONS_l2_00013998-XLOC_l2_007567	Broad TUCP // Broad TUCP	linc-C2orf27A-1 chr2:+:132440112-132443258 // linc-C2orf27A-1 chr2:+:132442469-132457434	chr2	+	132440113	132457434	---	---	---	---	---	---	---	---	---	---	---	---	---	---	main
TC03002354.hg.1	---	accn=BC010911 class=mRNAlike lncRNA name=NULL ref=H-invitational v7.5 transcriptId=HIT000087563 cpcScore=1.9791200 cnci=-0.3320899	noncoding	0.0497033	0.38	225.84	75.24	3	up	---	n333414	NONCODE	accn=BC010911 class=mRNAlike lncRNA name=NULL ref=H-invitational v7.5 transcriptId=HIT000087563 cpcScore=1.9791200 cnci=-0.3320899	chr3	+	57261833	57276951	---	---	---	---	---	---	---	---	---	---	---	---	---	---	main		APPL1
TC12002644.hg.1	---	accn=CR622106 class=mRNAlike lncRNA name=Human lncRNA ref=JounralRNA transcriptId=4537 cpcScore=-1.0814500 cnci=-0.3354599	noncoding	0.018846	0.295	160.15	53.29	3.01	up	---	n342056	NONCODE	accn=CR622106 class=mRNAlike lncRNA name=Human lncRNA ref=JounralRNA transcriptId=4537 cpcScore=-1.0814500 cnci=-0.3354599	chr12	+	125514067	125515683	---	---	---	---	---	---	---	---	---	---	---	---	---	---	main		BRI3BP
TC03002676.hg.1	---	accn=BC035463 class=mRNAlike lncRNA name=NULL ref=H-invitational v7.5 transcriptId=HIT000093919 cpcScore=-1.2223000 cnci=-0.3618598	noncoding	0.0071124	0.225	18.47	6.06	3.05	up	---	n333508	NONCODE	accn=BC035463 class=mRNAlike lncRNA name=NULL ref=H-invitational v7.5 transcriptId=HIT000093919 cpcScore=-1.2223000 cnci=-0.3618598	chr3	+	179305991	179306208	---	---	---	---	---	---	---	---	---	---	---	---	---	---	main		ACTL6A		MRPL47
TC12002391.hg.1	---	linc-RBMS2 chr12:+:56904733-56906923	noncoding	0.0373205	0.355	361.19	118.18	3.06	up	---	TCONS_l2_00005705-XLOC_l2_003009	Broad TUCP	linc-RBMS2 chr12:+:56904733-56906923	chr12	+	56904734	56906923	---	---	---	---	---	---	---	---	---	---	---	---	---	---	main			RBMS2 8686bp;
TC14000372.hg.1	FLJ22447	uncharacterized LOC400221	noncoding	0.0008201	0.124	64.9	21.04	3.08	up	14q23.1	NR_039985	RefSeq // ENSEMBL // ENSEMBL // UCSC Genes	Homo sapiens uncharacterized LOC400221 (FLJ22447), non-coding RNA. // cdna:novel chromosome:GRCh37:14:62037314:62121431:1 gene:ENSG00000232774 gene_biotype:protein_coding transcript_biotype:protein_coding // cdna:putative chromosome:GRCh37:14:62114138:62120719:1 gene:ENSG00000232774 gene_biotype:protein_coding transcript_biotype:protein_coding // ---	chr14	+	62037258	62121431	---	---	---	---	---	---	---	---	---	---	---	---	---	---	main		PRKCH
TC17000166.hg.1	MGC12916	uncharacterized protein MGC12916	noncoding	4.95e-05	0.0655	250.23	81.02	3.09	up	17p12	NR_026880	RefSeq // UCSC Genes	Homo sapiens uncharacterized protein MGC12916 (MGC12916), non-coding RNA. // ---	chr17	+	14207057	14209062	---	---	---	---	---	---	---	---	---	---	---	---	---	---	main		HS3ST3B1
TC14001197.hg.1	---	havana:lincRNA chromosome:GRCh37:14:62182276:62217815:-1 gene:ENSG00000258667 gene_biotype:lincRNA transcript_biotype:lincRNA	noncoding	0.028727	0.333	81.61	26.23	3.11	up	---	ENST00000554254	ENSEMBL	havana:lincRNA chromosome:GRCh37:14:62182276:62217815:-1 gene:ENSG00000258667 gene_biotype:lincRNA transcript_biotype:lincRNA	chr14	-	62182276	62217815	---	---	---	---	---	---	---	---	---	---	---	---	---	---	main				HIF1A
TC14001573.hg.1	---	accn=NULL class=lncRNA name= ref=EnsemblNoncode transcriptId=ENST00000547220 cpcScore=-0.0230567 cnci=-0.0997570 | accn=NULL class=lncRNA name= ref=EnsemblNoncode transcriptId=ENST00000441500 cpcScore=1.3762500 cnci=-0.2655130 | accn=NULL class=lncRNA name= ref=EnsemblNoncode transcriptId=ENST00000418499 cpcScore=-0.0054188 cnci=-0.1725139 | accn=NULL class=lncRNA name= ref=EnsemblNoncode transcr…	noncoding	0.00048	0.107	68.51	21.99	3.12	up	---	n380762	NONCODE // NONCODE // NONCODE // NONCODE // NONCODE // NONCODE // NONCODE // NONCODE // NONCODE // NONCODE // NONCODE // NONCODE // NONCODE // Broad TUCP // Broad TUCP // Broad TUCP // Broad TUCP // Broad TUCP // Broad TUCP // Broad TUCP // Broad TUCP	accn=NULL class=lncRNA name= ref=EnsemblNoncode transcriptId=ENST00000547220 cpcScore=-0.0230567 cnci=-0.0997570 // accn=NULL class=lncRNA name= ref=EnsemblNoncode transcriptId=ENST00000441500 cpcScore=1.3762500 cnci=-0.2655130 // accn=NULL class=lncRNA name= ref=EnsemblNoncode transcriptId=ENST00000418499 cpcScore=-0.0054188 cnci=-0.1725139 // accn=NULL class=lncRNA name= ref=EnsemblNoncode tran…	chr14	+	19650018	19718563	---	---	---	---	---	---	---	---	---	---	---	---	---	---	main		LOC100506303 POTEG
TC22001186.hg.1	---	accn=NULL class=lincRNA name=Human lincRNA ref=Scripture Reconstruction LincRNAs By Luo transcriptId=linc_luo_1922 cpcScore=-1.3888100 cnci=-0.2742654 | linc-RABL2B-1 chr22:-:16101369-16192974 | linc-RABL2B-1 chr22:-:16124263-16193004 | linc-RABL2B-1 chr22:-:16147978-16192971 | linc-RABL2B-1 chr22:-:16150528-16193004 | linc-RABL2B-1 chr22:-:16151706-16192967 | linc-RABL2B-1 chr22:-:16151706-16192…	noncoding	0.0019885	0.153	62.7	20.05	3.13	up	---	n346372	NONCODE // Broad TUCP // Broad TUCP // Broad TUCP // Broad TUCP // Broad TUCP // Broad TUCP // Broad TUCP // Broad TUCP // Broad TUCP // Broad TUCP // Broad TUCP // Broad TUCP // Broad TUCP // Broad TUCP	accn=NULL class=lincRNA name=Human lincRNA ref=Scripture Reconstruction LincRNAs By Luo transcriptId=linc_luo_1922 cpcScore=-1.3888100 cnci=-0.2742654 // linc-RABL2B-1 chr22:-:16101369-16192974 // linc-RABL2B-1 chr22:-:16124263-16193004 // linc-RABL2B-1 chr22:-:16147978-16192971 // linc-RABL2B-1 chr22:-:16150528-16193004 // linc-RABL2B-1 chr22:-:16151706-16192967 // linc-RABL2B-1 chr22:-:16151706…	chr22	-	16101370	16193226	---	---	---	---	---	---	---	---	---	---	---	---	---	---	main
TC03002595.hg.1	---	linc-TSC22D2-4 chr3:+:149768637-149769297	noncoding	0.0031455	0.178	57.26	18.25	3.14	up	---	TCONS_l2_00018923-XLOC_l2_009939	Broad TUCP	linc-TSC22D2-4 chr3:+:149768637-149769297	chr3	+	149768638	149769297	---	---	---	---	---	---	---	---	---	---	---	---	---	---	main
TC08002334.hg.1	---	linc-RPS20 chr8:-:57014014-57014848 | linc-RPS20 chr8:-:57014015-57014813	noncoding	0.0301018	0.335	1059.59	335.35	3.16	up	---	TCONS_l2_00028203-XLOC_l2_014518	Broad TUCP // Broad TUCP	linc-RPS20 chr8:-:57014014-57014848 // linc-RPS20 chr8:-:57014015-57014813	chr8	-	57014015	57014848	---	---	---	---	---	---	---	---	---	---	---	---	---	---	main
TC14001907.hg.1	---	accn=NULL class=lncRNA name= ref=EnsemblNoncode transcriptId=ENST00000551334 cpcScore=0.6153980 cnci=-0.2132942 | accn=NULL class=lincRNA name=Human lincRNA ref=Scripture Reconstruction LincRNAs By Luo transcriptId=linc_luo_1996 cpcScore=-1.5220500 cnci=-0.4026865 | accn=NULL class=lncRNA name= ref=EnsemblNoncode transcriptId=ENST00000546382 cpcScore=0.2889160 cnci=-0.1610230 | accn=NULL class=ln…	noncoding	0.0009478	0.126	60.49	19.12	3.16	up	---	n380931	NONCODE // NONCODE // NONCODE // NONCODE // NONCODE // NONCODE // NONCODE // NONCODE // NONCODE // NONCODE // NONCODE // NONCODE // NONCODE // Broad TUCP // Broad TUCP // Broad TUCP // Broad TUCP // Broad TUCP	accn=NULL class=lncRNA name= ref=EnsemblNoncode transcriptId=ENST00000551334 cpcScore=0.6153980 cnci=-0.2132942 // accn=NULL class=lincRNA name=Human lincRNA ref=Scripture Reconstruction LincRNAs By Luo transcriptId=linc_luo_1996 cpcScore=-1.5220500 cnci=-0.4026865 // accn=NULL class=lncRNA name= ref=EnsemblNoncode transcriptId=ENST00000546382 cpcScore=0.2889160 cnci=-0.1610230 // accn=NULL class…	chr14	-	19854098	19925348	---	---	---	---	---	---	---	---	---	---	---	---	---	---	main		LOC100653149		POTEG
TC03003297.hg.1	---	accn=NULL class=lncRNA name= ref=UCSCGeneNoncode transcriptId=uc003fwf.1 cpcScore=-0.4361260 cnci=-0.2981330	noncoding	0.0179862	0.291	296.27	92.89	3.19	up	---	n384393	NONCODE	accn=NULL class=lncRNA name= ref=UCSCGeneNoncode transcriptId=uc003fwf.1 cpcScore=-0.4361260 cnci=-0.2981330	chr3	-	195961240	195964785	---	---	---	---	---	---	---	---	---	---	---	---	---	---	main		PCYT1A		OSTalpha
TC11003187.hg.1	---	accn=NULL class=lncRNA name= ref=EnsemblNoncode transcriptId=ENST00000539921 cpcScore=-1.1122100 cnci=-0.2412675 | accn=NULL class=lncRNA name= ref=EnsemblNoncode transcriptId=ENST00000537925 cpcScore=-1.1293700 cnci=-0.2746423 | accn=NULL class=lncRNA name= ref=EnsemblNoncode transcriptId=ENST00000540725 cpcScore=-1.1257000 cnci=-0.2599274 | accn=NR003098 class=mRNAlike lncRNA name=SNHG1 ref=lnc…	noncoding	0.0371962	0.355	290.4	90.62	3.2	up	---	n380540	NONCODE // NONCODE // NONCODE // NONCODE // NONCODE // NONCODE // NONCODE // NONCODE // NONCODE // NONCODE // NONCODE // NONCODE // NONCODE // NONCODE // NONCODE // NONCODE // NONCODE // NONCODE // NONCODE // NONCODE // NONCODE // NONCODE // NONCODE // NONCODE // NONCODE // NONCODE	accn=NULL class=lncRNA name= ref=EnsemblNoncode transcriptId=ENST00000539921 cpcScore=-1.1122100 cnci=-0.2412675 // accn=NULL class=lncRNA name= ref=EnsemblNoncode transcriptId=ENST00000537925 cpcScore=-1.1293700 cnci=-0.2746423 // accn=NULL class=lncRNA name= ref=EnsemblNoncode transcriptId=ENST00000540725 cpcScore=-1.1257000 cnci=-0.2599274 // accn=NR003098 class=mRNAlike lncRNA name=SNHG1 ref=…	chr11	-	62619460	62623386	---	---	---	---	---	---	---	---	---	---	---	---	---	---	main
TC03003299.hg.1	---	accn=NULL class=lncRNA name= ref=UCSCGeneNoncode transcriptId=uc010iag.1 cpcScore=-1.1948800 cnci=-0.4209976	noncoding	0.0217598	0.305	80.18	24.92	3.22	up	---	n386350	NONCODE	accn=NULL class=lncRNA name= ref=UCSCGeneNoncode transcriptId=uc010iag.1 cpcScore=-1.1948800 cnci=-0.4209976	chr3	-	196195811	196197773	---	---	---	---	---	---	---	---	---	---	---	---	---	---	main		RNF168
TC22000438.hg.1	---	cdna:known chromosome:GRCh37:22:16147979:16192971:-1 gene:ENSG00000206195 gene_biotype:pseudogene transcript_biotype:processed_transcript	noncoding	0.0012289	0.135	131.13	40.61	3.23	up	---	ENST00000447898	ENSEMBL // UCSC Genes // UCSC Genes	cdna:known chromosome:GRCh37:22:16147979:16192971:-1 gene:ENSG00000206195 gene_biotype:pseudogene transcript_biotype:processed_transcript // --- // ---	chr22	-	16147979	16193004	---	---	---	---	---	---	---	---	---	---	---	---	---	---	main
TC01005497.hg.1	---	accn=NR_033142 class=lncRNA name= ref=RefGeneNoncode transcriptId=NR_033142 cpcScore=12.0099000 cnci=-0.3793834	noncoding	0.0244641	0.317	437.92	134.16	3.26	up	---	n409072	NONCODE	accn=NR_033142 class=lncRNA name= ref=RefGeneNoncode transcriptId=NR_033142 cpcScore=12.0099000 cnci=-0.3793834	chr1	-	54231134	54304225	---	---	---	---	---	---	---	---	---	---	---	---	---	---	main		TMEM48
TC06003742.hg.1	---	accn=NULL class=lncRNA name= ref=UCSCGeneNoncode transcriptId=uc003pju.1 cpcScore=2.1575800 cnci=-0.3051229	noncoding	0.0387556	0.359	109.02	33.17	3.29	up	---	n384968	NONCODE	accn=NULL class=lncRNA name= ref=UCSCGeneNoncode transcriptId=uc003pju.1 cpcScore=2.1575800 cnci=-0.3051229	chr6	-	83874595	83877215	---	---	---	---	---	---	---	---	---	---	---	---	---	---	main		PGM3		DOPEY1
TC02003252.hg.1	---	accn=NR_036441 class=lncRNA name= ref=RefGeneNoncode transcriptId=NR_036441 cpcScore=3.9459000 cnci=-0.2601862	noncoding	0.0324236	0.342	130.92	39.44	3.32	up	---	n410013	NONCODE	accn=NR_036441 class=lncRNA name= ref=RefGeneNoncode transcriptId=NR_036441 cpcScore=3.9459000 cnci=-0.2601862	chr2	+	58273777	58387055	---	---	---	---	---	---	---	---	---	---	---	---	---	---	main		VRK2		FANCL
TC05002617.hg.1	---	accn=BC022429 class=mRNAlike lncRNA name=Human lncRNA ref=JounralRNA transcriptId=3073 cpcScore=-1.1628100 cnci=-0.3184766	noncoding	0.0382125	0.357	38.95	11.62	3.35	up	---	n340611	NONCODE	accn=BC022429 class=mRNAlike lncRNA name=Human lncRNA ref=JounralRNA transcriptId=3073 cpcScore=-1.1628100 cnci=-0.3184766	chr5	+	130540152	130541120	---	---	---	---	---	---	---	---	---	---	---	---	---	---	main		LYRM7
TC05002611.hg.1	---	accn=AF439152 class=mRNAlike lncRNA name=NULL ref=H-invitational v7.5 transcriptId=HIT000079665 cpcScore=4.0850400 cnci=-0.2476181	noncoding	0.0459995	0.373	106.49	31.62	3.37	up	---	n333193	NONCODE	accn=AF439152 class=mRNAlike lncRNA name=NULL ref=H-invitational v7.5 transcriptId=HIT000079665 cpcScore=4.0850400 cnci=-0.2476181	chr5	+	127487042	127516674	---	---	---	---	---	---	---	---	---	---	---	---	---	---	main		SLC12A2
TC06002991.hg.1	---	accn=AK024740 class=mRNAlike lncRNA name=NULL ref=H-invitational v7.5 transcriptId=HIT000008014 cpcScore=2.0600200 cnci=-0.3058082 | accn=BC005347 class=mRNAlike lncRNA name=NULL ref=H-invitational v7.5 transcriptId=HIT000086516 cpcScore=2.7821800 cnci=-0.3177110	noncoding	0.0071183	0.225	517.41	153.29	3.38	up	---	n332600	NONCODE // NONCODE	accn=AK024740 class=mRNAlike lncRNA name=NULL ref=H-invitational v7.5 transcriptId=HIT000008014 cpcScore=2.0600200 cnci=-0.3058082 // accn=BC005347 class=mRNAlike lncRNA name=NULL ref=H-invitational v7.5 transcriptId=HIT000086516 cpcScore=2.7821800 cnci=-0.3177110	chr6	+	111303243	111346793	---	---	---	---	---	---	---	---	---	---	---	---	---	---	main		RPF2
TC12002967.hg.1	---	accn=AF088017 class=mRNAlike lncRNA name=NULL ref=H-invitational v7.5 transcriptId=HIT000067565 cpcScore=-1.3922900 cnci=-0.5481020	noncoding	0.0457297	0.372	394.69	116.64	3.38	up	---	n332941	NONCODE	accn=AF088017 class=mRNAlike lncRNA name=NULL ref=H-invitational v7.5 transcriptId=HIT000067565 cpcScore=-1.3922900 cnci=-0.5481020	chr12	-	76441478	76441891	---	---	---	---	---	---	---	---	---	---	---	---	---	---	main		NAP1L1
TC06003705.hg.1	---	accn=NULL class=lncRNA name= ref=UCSCGeneNoncode transcriptId=uc003pes.1 cpcScore=2.0208500 cnci=-0.2369742 | linc-EYS-1 chr6:-:68590880-68599051 | linc-EYS-1 chr6:-:68596622-68599080	noncoding	2.65e-05	0.0577	203.55	59.87	3.4	up	---	n384958	NONCODE // Broad TUCP // Broad TUCP	accn=NULL class=lncRNA name= ref=UCSCGeneNoncode transcriptId=uc003pes.1 cpcScore=2.0208500 cnci=-0.2369742 // linc-EYS-1 chr6:-:68590880-68599051 // linc-EYS-1 chr6:-:68596622-68599080	chr6	-	68590881	68599080	---	---	---	---	---	---	---	---	---	---	---	---	---	---	main
TC12002850.hg.1	---	accn=S77359 class=mRNAlike lncRNA name=NULL ref=H-invitational v7.5 transcriptId=HIT000216720 cpcScore=-1.0924300 cnci=-0.3973430	noncoding	0.0456052	0.372	98.3	28.82	3.41	up	---	n334375	NONCODE	accn=S77359 class=mRNAlike lncRNA name=NULL ref=H-invitational v7.5 transcriptId=HIT000216720 cpcScore=-1.0924300 cnci=-0.3973430	chr12	-	46581574	46581823	---	---	---	---	---	---	---	---	---	---	---	---	---	---	main		SLC38A1
TC03002445.hg.1	---	linc-ZPLD1 chr3:+:101659702-101716770 | linc-ZPLD1 chr3:+:101679201-101716770 | linc-ZPLD1 chr3:+:101679229-101715376 | linc-ZPLD1 chr3:+:101713657-101715502	noncoding	0.001161	0.135	54.58	15.89	3.43	up	---	TCONS_00005382-XLOC_002741	Rinn lincRNAs // Rinn lincRNAs // Rinn lincRNAs // Rinn lincRNAs	linc-ZPLD1 chr3:+:101659702-101716770 // linc-ZPLD1 chr3:+:101679201-101716770 // linc-ZPLD1 chr3:+:101679229-101715376 // linc-ZPLD1 chr3:+:101713657-101715502	chr3	+	101659703	101716770	---	---	---	---	---	---	---	---	---	---	---	---	---	---	main
TC01005765.hg.1	---	accn=NULL class=lincRNA name=Human lincRNA ref=Scripture Reconstruction LincRNAs By Luo transcriptId=linc_luo_1230 cpcScore=-1.3455100 cnci=-0.1626233	noncoding	0.0433877	0.369	558.81	161.32	3.46	up	---	n345681	NONCODE	accn=NULL class=lincRNA name=Human lincRNA ref=Scripture Reconstruction LincRNAs By Luo transcriptId=linc_luo_1230 cpcScore=-1.3455100 cnci=-0.1626233	chr1	-	143906069	143912903	---	---	---	---	---	---	---	---	---	---	---	---	---	---	main		FAM72D
TC06000729.hg.1	KCNQ5-IT1	KCNQ5 intronic transcript 1 (non-protein coding)	noncoding	0.0031315	0.178	132.68	38.13	3.48	up	---	ENST00000445310	ENSEMBL // Havana transcript	havana:sense_intronic chromosome:GRCh37:6:73340223:73388282:1 gene:ENSG00000233844 gene_biotype:sense_intronic transcript_biotype:sense_intronic // cdna:all chromosome:VEGA50:6:73340223:73388282:1 Gene:OTTHUMG00000015014	chr6	+	73340223	73388282	---	---	---	---	---	---	---	---	---	---	---	---	---	---	main		KCNQ5
TC04001995.hg.1	---	accn=BC014384 class=mRNAlike lncRNA name=Human lncRNA ref=JounralRNA transcriptId=2420 cpcScore=-1.2777800 cnci=-0.4982155	noncoding	0.0375797	0.355	100.91	28.9	3.49	up	---	n339967	NONCODE	accn=BC014384 class=mRNAlike lncRNA name=Human lncRNA ref=JounralRNA transcriptId=2420 cpcScore=-1.2777800 cnci=-0.4982155	chr4	+	41961159	41962573	---	---	---	---	---	---	---	---	---	---	---	---	---	---	main		TMEM33
TC10001924.hg.1	---	accn=NULL class=lncRNA name= ref=UCSCGeneNoncode transcriptId=uc001iqe.2 cpcScore=-1.2488100 cnci=-0.4433531	noncoding	0.0326039	0.342	72.97	20.46	3.57	up	---	n381409	NONCODE	accn=NULL class=lncRNA name= ref=UCSCGeneNoncode transcriptId=uc001iqe.2 cpcScore=-1.2488100 cnci=-0.4433531	chr10	+	18967049	18970567	---	---	---	---	---	---	---	---	---	---	---	---	---	---	main		ARL5B
TC13001569.hg.1	---	accn=BC012468 class=mRNAlike lncRNA name=NULL ref=H-invitational v7.5 transcriptId=HIT000087866 cpcScore=2.6530600 cnci=-0.3103834	noncoding	0.0490944	0.379	255.94	71.51	3.58	up	---	n333420	NONCODE	accn=BC012468 class=mRNAlike lncRNA name=NULL ref=H-invitational v7.5 transcriptId=HIT000087866 cpcScore=2.6530600 cnci=-0.3103834	chr13	-	73350067	73356066	---	---	---	---	---	---	---	---	---	---	---	---	---	---	main		DIS3
TC03000526.hg.1	LOC152225	uncharacterized LOC152225	noncoding	0.0010616	0.131	59.51	16.53	3.6	up	3q12.3	NR_026934	RefSeq // ENSEMBL // ENSEMBL // ENSEMBL // UCSC Genes // Havana transcript // Havana transcript // Havana transcript	Homo sapiens uncharacterized LOC152225 (LOC152225), non-coding RNA. // ensembl_havana_transcript:lincRNA chromosome:GRCh37:3:101659703:101716770:1 gene:ENSG00000214407 gene_biotype:lincRNA transcript_biotype:lincRNA // havana:lincRNA chromosome:GRCh37:3:101679202:101716770:1 gene:ENSG00000241280 gene_biotype:lincRNA transcript_biotype:lincRNA // havana:lincRNA chromosome:GRCh37:3:101679230:101715…	chr3	+	101659703	101716770	---	---	---	---	---	---	---	---	---	---	---	---	---	---	main
TC15002245.hg.1	---	accn=NR_003105 class=lncRNA name= ref=RefGeneNoncode transcriptId=NR_003105 cpcScore=11.4764000 cnci=-0.3951601	noncoding	0.0494735	0.379	147.62	40.35	3.66	up	---	n405879	NONCODE	accn=NR_003105 class=lncRNA name= ref=RefGeneNoncode transcriptId=NR_003105 cpcScore=11.4764000 cnci=-0.3951601	chr15	+	66797431	66841822	---	---	---	---	---	---	---	---	---	---	---	---	---	---	main		ZWILCH		LCTL RPL4
TC05003345.hg.1	---	accn=AK055998 class=mRNAlike lncRNA name=Human lncRNA ref=JounralRNA transcriptId=3193 cpcScore=4.9717300 cnci=-0.2241135	noncoding	0.0036938	0.185	274.78	74.77	3.67	up	---	n340730	NONCODE	accn=AK055998 class=mRNAlike lncRNA name=Human lncRNA ref=JounralRNA transcriptId=3193 cpcScore=4.9717300 cnci=-0.2241135	chr5	-	169291313	169407744	---	---	---	---	---	---	---	---	---	---	---	---	---	---	main		FAM196B		DOCK2
TC17002479.hg.1	---	accn=BC008968 class=mRNAlike lncRNA name=NULL ref=H-invitational v7.5 transcriptId=HIT000087180 cpcScore=4.1403600 cnci=-0.2539072	noncoding	0.041795	0.365	327.18	86.78	3.77	up	---	n333400	NONCODE	accn=BC008968 class=mRNAlike lncRNA name=NULL ref=H-invitational v7.5 transcriptId=HIT000087180 cpcScore=4.1403600 cnci=-0.2539072	chr17	-	8415787	8424218	---	---	---	---	---	---	---	---	---	---	---	---	---	---	main		MYH10
TC03002771.hg.1	---	accn=NR_026786 class=lncRNA name= ref=RefGeneNoncode transcriptId=NR_026786 cpcScore=3.9947600 cnci=-0.2471336	noncoding	0.0204947	0.302	154.33	40.74	3.79	up	---	n407319	NONCODE	accn=NR_026786 class=lncRNA name= ref=RefGeneNoncode transcriptId=NR_026786 cpcScore=3.9947600 cnci=-0.2471336	chr3	+	197687071	197770591	---	---	---	---	---	---	---	---	---	---	---	---	---	---	main	RPL35A 3590bp;	LMLN
TC09002184.hg.1	---	accn=NR_036651 class=lncRNA name= ref=RefGeneNoncode transcriptId=NR_036651 cpcScore=6.3955900 cnci=-0.3595375	noncoding	0.0459419	0.373	340.42	89.81	3.79	up	---	n410169	NONCODE	accn=NR_036651 class=lncRNA name= ref=RefGeneNoncode transcriptId=NR_036651 cpcScore=6.3955900 cnci=-0.3595375	chr9	+	115142189	115234685	---	---	---	---	---	---	---	---	---	---	---	---	---	---	main		HSDL2		C9orf147
TC22000929.hg.1	---	linc-IL17RA-6 chr22:+:17053605-17055481 | linc-IL17RA-6 chr22:+:17054311-17055470	noncoding	0.0215089	0.305	67.68	17.6	3.85	up	---	TCONS_l2_00017541-XLOC_l2_009280	Broad TUCP // Broad TUCP	linc-IL17RA-6 chr22:+:17053605-17055481 // linc-IL17RA-6 chr22:+:17054311-17055470	chr22	+	17053606	17055481	---	---	---	---	---	---	---	---	---	---	---	---	---	---	main
TC14001718.hg.1	---	accn=AL833129 class=mRNAlike lncRNA name=Human lncRNA ref=JounralRNA transcriptId=719 cpcScore=-1.2066200 cnci=-0.3348852	noncoding	0.039879	0.362	149.69	38.42	3.9	up	---	n338325	NONCODE	accn=AL833129 class=mRNAlike lncRNA name=Human lncRNA ref=JounralRNA transcriptId=719 cpcScore=-1.2066200 cnci=-0.3348852	chr14	+	60606871	60610109	---	---	---	---	---	---	---	---	---	---	---	---	---	---	main		C14orf135
TC03001025.hg.1	SNORA81	small nucleolar RNA, H/ACA box 81	noncoding	0.0096673	0.244	204.46	52.09	3.93	up	3q27.3	NR_002989	RefSeq // RefSeq // RefSeq // RefSeq // RefSeq // RefSeq // ENSEMBL // ENSEMBL // ENSEMBL // ENSEMBL // ENSEMBL // ENSEMBL // ENSEMBL // UCSC Genes // UCSC Genes // UCSC Genes // UCSC Genes // UCSC Genes // UCSC Genes // UCSC Genes // UCSC Genes // UCSC Genes // GenBank // GenBank // GenBank // GenBank // Havana transcript // Havana transcript // Havana transcript // Havana transcript // Havana t…	Homo sapiens small nucleolar RNA, H/ACA box 81 (SNORA81), small nucleolar RNA. // Homo sapiens eukaryotic translation initiation factor 4A2 (EIF4A2), mRNA. // Homo sapiens small nucleolar RNA, H/ACA box 63 (SNORA63), small nucleolar RNA. // Homo sapiens small nucleolar RNA, C/D box 2 (SNORD2), small nucleolar RNA. // Homo sapiens small nucleolar RNA, H/ACA box 4 (SNORA4), small nucleolar RNA. // …	chr3	+	186500994	186507689	GO:0000288 // GO:0000289 // GO:0006412 // GO:0006413 // GO:0006446 // GO:0010467 // GO:0016070 // GO:0016071 // GO:0019221 // GO:0044267 // GO:0044419 // GO:0000288 // GO:0000289 // GO:0006412 // GO:0006413 // GO:0006446 // GO:0010467 // GO:0016070 // GO:0016071 // GO:0019221 // GO:0044267 // GO:0044419 // GO:0000288 // GO:0000289 // GO:0006412 // GO:0006413 // GO:0006446 // GO:0010467 // GO:0016…	nuclear-transcribed mRNA catabolic process, deadenylation-dependent decay // nuclear-transcribed mRNA poly(A) tail shortening // translation // translational initiation // regulation of translational initiation // gene expression // RNA metabolic process // mRNA metabolic process // cytokine-mediated signaling pathway // cellular protein metabolic process // interspecies interaction between organ…	traceable author statement // traceable author statement // traceable author statement // traceable author statement // traceable author statement // traceable author statement // traceable author statement // traceable author statement // traceable author statement // traceable author statement // inferred from electronic annotation // traceable author statement // traceable author statement // …	GO:0005829 // GO:0016281 // GO:0005829 // GO:0016281 // GO:0005829 // GO:0016281 // GO:0005829 // GO:0016281 // GO:0005829 // GO:0016281 // GO:0005829 // GO:0016281 // GO:0005829 // GO:0016281 // GO:0005829 // GO:0016281	cytosol // eukaryotic translation initiation factor 4F complex // cytosol // eukaryotic translation initiation factor 4F complex // cytosol // eukaryotic translation initiation factor 4F complex // cytosol // eukaryotic translation initiation factor 4F complex // cytosol // eukaryotic translation initiation factor 4F complex // cytosol // eukaryotic translation initiation factor 4F complex // cyt…	traceable author statement // traceable author statement // traceable author statement // traceable author statement // traceable author statement // traceable author statement // traceable author statement // traceable author statement // traceable author statement // traceable author statement // traceable author statement // traceable author statement // traceable author statement // traceable…	GO:0003743 // GO:0004386 // GO:0005515 // GO:0005524 // GO:0008026 // GO:0003743 // GO:0004386 // GO:0005515 // GO:0005524 // GO:0008026 // GO:0003743 // GO:0004386 // GO:0005515 // GO:0005524 // GO:0008026 // GO:0003743 // GO:0004386 // GO:0005515 // GO:0005524 // GO:0008026 // GO:0003743 // GO:0004386 // GO:0005515 // GO:0005524 // GO:0008026 // GO:0003743 // GO:0004386 // GO:0005515 // GO:0005…	translation initiation factor activity // helicase activity // protein binding // ATP binding // ATP-dependent helicase activity // translation initiation factor activity // helicase activity // protein binding // ATP binding // ATP-dependent helicase activity // translation initiation factor activity // helicase activity // protein binding // ATP binding // ATP-dependent helicase activity // tra…	inferred from electronic annotation // traceable author statement // inferred from physical interaction // inferred from electronic annotation // inferred from electronic annotation // inferred from electronic annotation // traceable author statement // inferred from physical interaction // inferred from electronic annotation // inferred from electronic annotation // inferred from electronic anno…	GenMAPP // GenMAPP // GenMAPP // GenMAPP // GenMAPP	Translation_Factors // Translation_Factors // Translation_Factors // Translation_Factors // Translation_Factors	Pfam // Pfam // Pfam // Pfam // Pfam // Pfam	IPR001650 // IPR011545 // IPR001650 // IPR011545 // IPR001650 // IPR011545	Helicase, C-terminal // DNA/RNA helicase, DEAD/DEAH box type, N-terminal // Helicase, C-terminal // DNA/RNA helicase, DEAD/DEAH box type, N-terminal // Helicase, C-terminal // DNA/RNA helicase, DEAD/DEAH box type, N-terminal	main				RFC4
TC09002562.hg.1	---	linc-FAM75A7-30 chr9:-:68743530-68769869	noncoding	0.0001091	0.0849	31.62	7.88	4.01	up	---	TCONS_l2_00029973-XLOC_l2_015214	Broad TUCP	linc-FAM75A7-30 chr9:-:68743530-68769869	chr9	-	68743531	68769869	---	---	---	---	---	---	---	---	---	---	---	---	---	---	main
TC03002769.hg.1	---	accn=NR_027840 class=lncRNA name= ref=RefGeneNoncode transcriptId=NR_027840 cpcScore=3.4524300 cnci=-0.3558625	noncoding	0.0171548	0.288	159.77	39.29	4.07	up	---	n408048	NONCODE	accn=NR_027840 class=lncRNA name= ref=RefGeneNoncode transcriptId=NR_027840 cpcScore=3.4524300 cnci=-0.3558625	chr3	+	197477261	197511317	---	---	---	---	---	---	---	---	---	---	---	---	---	---	main		FYTTD1	LRCH3 6780bp;
TC07003061.hg.1	---	accn=AK172791 class=mRNAlike lncRNA name=Human lncRNA ref=JounralRNA transcriptId=3742 cpcScore=-1.2043000 cnci=-0.4078466	noncoding	0.0431603	0.369	495.34	121.7	4.07	up	---	n341273	NONCODE	accn=AK172791 class=mRNAlike lncRNA name=Human lncRNA ref=JounralRNA transcriptId=3742 cpcScore=-1.2043000 cnci=-0.4078466	chr7	-	92240782	92243238	---	---	---	---	---	---	---	---	---	---	---	---	---	---	main		CDK6
TC01004452.hg.1	---	accn=AK026966 class=mRNAlike lncRNA name=Human lncRNA ref=JounralRNA transcriptId=4756 cpcScore=-1.2302400 cnci=-0.3511155	noncoding	0.0376977	0.356	188.98	45.81	4.13	up	---	n342266	NONCODE	accn=AK026966 class=mRNAlike lncRNA name=Human lncRNA ref=JounralRNA transcriptId=4756 cpcScore=-1.2302400 cnci=-0.3511155	chr1	+	65695311	65697819	---	---	---	---	---	---	---	---	---	---	---	---	---	---	main		AK4
TC11003329.hg.1	---	accn=D83243 class=mRNAlike lncRNA name=Human lncRNA ref=JounralRNA transcriptId=5287 cpcScore=17.2452000 cnci=-0.2351070	noncoding	0.0433009	0.369	171.91	41.32	4.16	up	---	n342784	NONCODE	accn=D83243 class=mRNAlike lncRNA name=Human lncRNA ref=JounralRNA transcriptId=5287 cpcScore=17.2452000 cnci=-0.2351070	chr11	-	108028120	108093329	---	---	---	---	---	---	---	---	---	---	---	---	---	---	main		NPAT
TC02004168.hg.1	---	accn=NR_024191 class=lncRNA name= ref=RefGeneNoncode transcriptId=NR_024191 cpcScore=10.0459000 cnci=-0.3442441	noncoding	0.0376657	0.356	209.23	49.95	4.19	up	---	n406658	NONCODE	accn=NR_024191 class=lncRNA name= ref=RefGeneNoncode transcriptId=NR_024191 cpcScore=10.0459000 cnci=-0.3442441	chr2	-	38522029	38604432	---	---	---	---	---	---	---	---	---	---	---	---	---	---	main		ATL2
TC11003302.hg.1	---	accn=NR_023356 class=lncRNA name= ref=RefGeneNoncode transcriptId=NR_023356 cpcScore=6.3265200 cnci=-0.3198510	noncoding	0.0287096	0.333	325.35	77.13	4.22	up	---	n406463	NONCODE	accn=NR_023356 class=lncRNA name= ref=RefGeneNoncode transcriptId=NR_023356 cpcScore=6.3265200 cnci=-0.3198510	chr11	-	95566044	95657371	---	---	---	---	---	---	---	---	---	---	---	---	---	---	main		MTMR2 RN5S345
TC09002564.hg.1	---	accn=NULL class=lincRNA name=Human lincRNA ref=Scripture Reconstruction LincRNAs By Luo transcriptId=linc_luo_1828 cpcScore=-1.3152600 cnci=-0.1454281 | linc-FAM75A7-32 chr9:-:69080244-69147854 | linc-FAM75A7-32 chr9:-:69082535-69108793 | linc-FAM75A7-32 chr9:-:69098720-69148492 | linc-FAM75A7-32 chr9:-:69112478-69148492	noncoding	4.84e-05	0.0654	82.62	19.31	4.28	up	---	n346278	NONCODE // Broad TUCP // Broad TUCP // Broad TUCP // Broad TUCP	accn=NULL class=lincRNA name=Human lincRNA ref=Scripture Reconstruction LincRNAs By Luo transcriptId=linc_luo_1828 cpcScore=-1.3152600 cnci=-0.1454281 // linc-FAM75A7-32 chr9:-:69080244-69147854 // linc-FAM75A7-32 chr9:-:69082535-69108793 // linc-FAM75A7-32 chr9:-:69098720-69148492 // linc-FAM75A7-32 chr9:-:69112478-69148492	chr9	-	69080245	69148492	---	---	---	---	---	---	---	---	---	---	---	---	---	---	main				LOC100653336
TC11002856.hg.1	---	accn=D90228 class=mRNAlike lncRNA name=Human lncRNA ref=JounralRNA transcriptId=5286 cpcScore=7.8526200 cnci=-0.2575069	noncoding	0.05	0.38	386.43	90.3	4.28	up	---	n342783	NONCODE	accn=D90228 class=mRNAlike lncRNA name=Human lncRNA ref=JounralRNA transcriptId=5286 cpcScore=7.8526200 cnci=-0.2575069	chr11	+	107992258	108018275	---	---	---	---	---	---	---	---	---	---	---	---	---	---	main		ACAT1
TC03002679.hg.1	---	accn=BC010382 class=mRNAlike lncRNA name=NULL ref=H-invitational v7.5 transcriptId=HIT000087475 cpcScore=1.0551100 cnci=-0.4450412	noncoding	0.0054543	0.209	418.1	97.39	4.29	up	---	n333411	NONCODE	accn=BC010382 class=mRNAlike lncRNA name=NULL ref=H-invitational v7.5 transcriptId=HIT000087475 cpcScore=1.0551100 cnci=-0.4450412	chr3	+	180630453	180653017	---	---	---	---	---	---	---	---	---	---	---	---	---	---	main		FXR1
TC03002720.hg.1	---	accn=BX641108 class=mRNAlike lncRNA name=Human lncRNA ref=JounralRNA transcriptId=2183 cpcScore=-1.1488800 cnci=-0.3507352	noncoding	0.0418589	0.365	270.01	62.65	4.31	up	---	n339737	NONCODE	accn=BX641108 class=mRNAlike lncRNA name=Human lncRNA ref=JounralRNA transcriptId=2183 cpcScore=-1.1488800 cnci=-0.3507352	chr3	+	188604481	188608458	---	---	---	---	---	---	---	---	---	---	---	---	---	---	main		LPP
TC02003162.hg.1	---	accn=NR_037879 class=lncRNA name= ref=RefGeneNoncode transcriptId=NR_037879 cpcScore=0.6363220 cnci=-0.3615903 | accn=NR_037880 class=lncRNA name= ref=RefGeneNoncode transcriptId=NR_037880 cpcScore=0.6418990 cnci=-0.3799928	noncoding	0.0342568	0.347	276.11	63.76	4.33	up	---	n410638	NONCODE // NONCODE	accn=NR_037879 class=lncRNA name= ref=RefGeneNoncode transcriptId=NR_037879 cpcScore=0.6363220 cnci=-0.3615903 // accn=NR_037880 class=lncRNA name= ref=RefGeneNoncode transcriptId=NR_037880 cpcScore=0.6418990 cnci=-0.3799928	chr2	+	37423635	37431886	---	---	---	---	---	---	---	---	---	---	---	---	---	---	main				CEBPZ SULT6B1
TC10002678.hg.1	---	linc-JMJD1C-3 chr10:-:65929846-65930169	noncoding	0.0252192	0.32	179.98	41.06	4.38	up	---	TCONS_l2_00003601-XLOC_l2_002002	Broad TUCP	linc-JMJD1C-3 chr10:-:65929846-65930169	chr10	-	65929847	65930169	---	---	---	---	---	---	---	---	---	---	---	---	---	---	main
TC11003149.hg.1	---	accn=BC017856 class=mRNAlike lncRNA name=NULL ref=H-invitational v7.5 transcriptId=HIT000089435 cpcScore=4.2614600 cnci=-0.2843226	noncoding	0.0302102	0.336	893.15	201.74	4.43	up	---	n333441	NONCODE	accn=BC017856 class=mRNAlike lncRNA name=NULL ref=H-invitational v7.5 transcriptId=HIT000089435 cpcScore=4.2614600 cnci=-0.2843226	chr11	-	46832553	46867829	---	---	---	---	---	---	---	---	---	---	---	---	---	---	main		CKAP5
TC02003219.hg.1	---	accn=DQ648894 class=mRNAlike lncRNA name=NULL ref=H-invitational v7.5 transcriptId=HIT000393012 cpcScore=1.5889600 cnci=-0.1889403 | accn=DQ648895 class=mRNAlike lncRNA name=NULL ref=H-invitational v7.5 transcriptId=HIT000393013 cpcScore=1.0104100 cnci=-0.2334720	noncoding	0.0455488	0.372	485.38	108.45	4.48	up	---	n337366	NONCODE // NONCODE	accn=DQ648894 class=mRNAlike lncRNA name=NULL ref=H-invitational v7.5 transcriptId=HIT000393012 cpcScore=1.5889600 cnci=-0.1889403 // accn=DQ648895 class=mRNAlike lncRNA name=NULL ref=H-invitational v7.5 transcriptId=HIT000393013 cpcScore=1.0104100 cnci=-0.2334720	chr2	+	47630345	47657022	---	---	---	---	---	---	---	---	---	---	---	---	---	---	main		MSH2
TC13000904.hg.1	---	accn=NULL class=mRNAlike lncRNA name=vega lncRNA ref=GENCODE transcriptId=OTTHUMT00000044027 cpcScore=-1.1004600 cnci=-0.2232980	noncoding	0.0332179	0.344	70.8	15.63	4.53	up	---	n325807	NONCODE	accn=NULL class=mRNAlike lncRNA name=vega lncRNA ref=GENCODE transcriptId=OTTHUMT00000044027 cpcScore=-1.1004600 cnci=-0.2232980	chr13	+	19059258	19060490	---	---	---	---	---	---	---	---	---	---	---	---	---	---	main
[truncated: 19 more rows]

## Sheet: Introduction of this file
	Header of columns
[truncated: 31 more rows]
